# Supplementary material for: Mechanism, chemoselectivity and enantioselectivity for the rhodium-catalyzed desymmetric synthesis of hydrobenzofurans: a theoretical study
Source: Royal Society of Chemistry journal article supplement (doi:10.1039/c5qo00334b), 2015-12-03
Supplement: c5qo00334b1.pdf [file c5qo00334b1.pdf]

Mechanism, Chemoselectivity and Enantioselectivity for Rhodium-  
Catalyzed Desymmetric Synthesis of Hydrobenzofurans: A  
Theoretical Study

*Supporting Information*

*Zhaoyuan Yu, Xiaotian Qi, Yingzi Li, Song Liu, Yu Lan\**

School of Chemistry and Chemical Engineering, Chongqing University, Chongqing, China. 400030

E-mail: lanyu@cqu.edu.cn

## Table of contents

1. Free energy profiles for rhodium-catalyzed desymmetric synthesis of hydrobenzofurans with **L2**, **L3**, and **L4** ligand. Page 3
2. The calculated *ee* values by B97D3 functional, M06-L functional and M11-L functional. Page 9
3. B97D3, M06-L and M11-L calculated energies of **42-ts** and **61-ts**. Page 10
4. B3LYP, MN12-L absolute calculation free energies. Page 11
5. B3LYP geometries for all the optimized compounds and transition states. Page 15

# 1. Free energy profiles for rhodium-catalyzed desymmetric synthesis of hydrobenzofurans with L2, L3, and L4 ligand.

As shown in Figure S1. After dissociation of rhodium complex **24-L2**, the complex **25-L2** undergoes transmetallation with reactant **19** via transition state **27-ts-L2** with an overall energy barrier of 14.8 kcal/mol. There are two insertion modes when intermediate **33-L2** is formed by the coordination of substrate **18**. The relative free energy of transition state **34-ts-L2** is 4.8 kcal/mol higher than **36-ts-L2**. Intermediate **37-L2** could isomerize to **41-L2** then intramolecular alkene insertion takes place in transition state **42-ts-L2** with 5.5 kcal/mol energy barrier. We also considered the competition with intermolecular alkyne insertion. When another molecule **18** coordinates with **37-L2**, the free energy increased 4.2 kcal/mol. The following alkyne insertion would take place via **39-ts-L2** with 26.4 kcal/mol energy barrier.

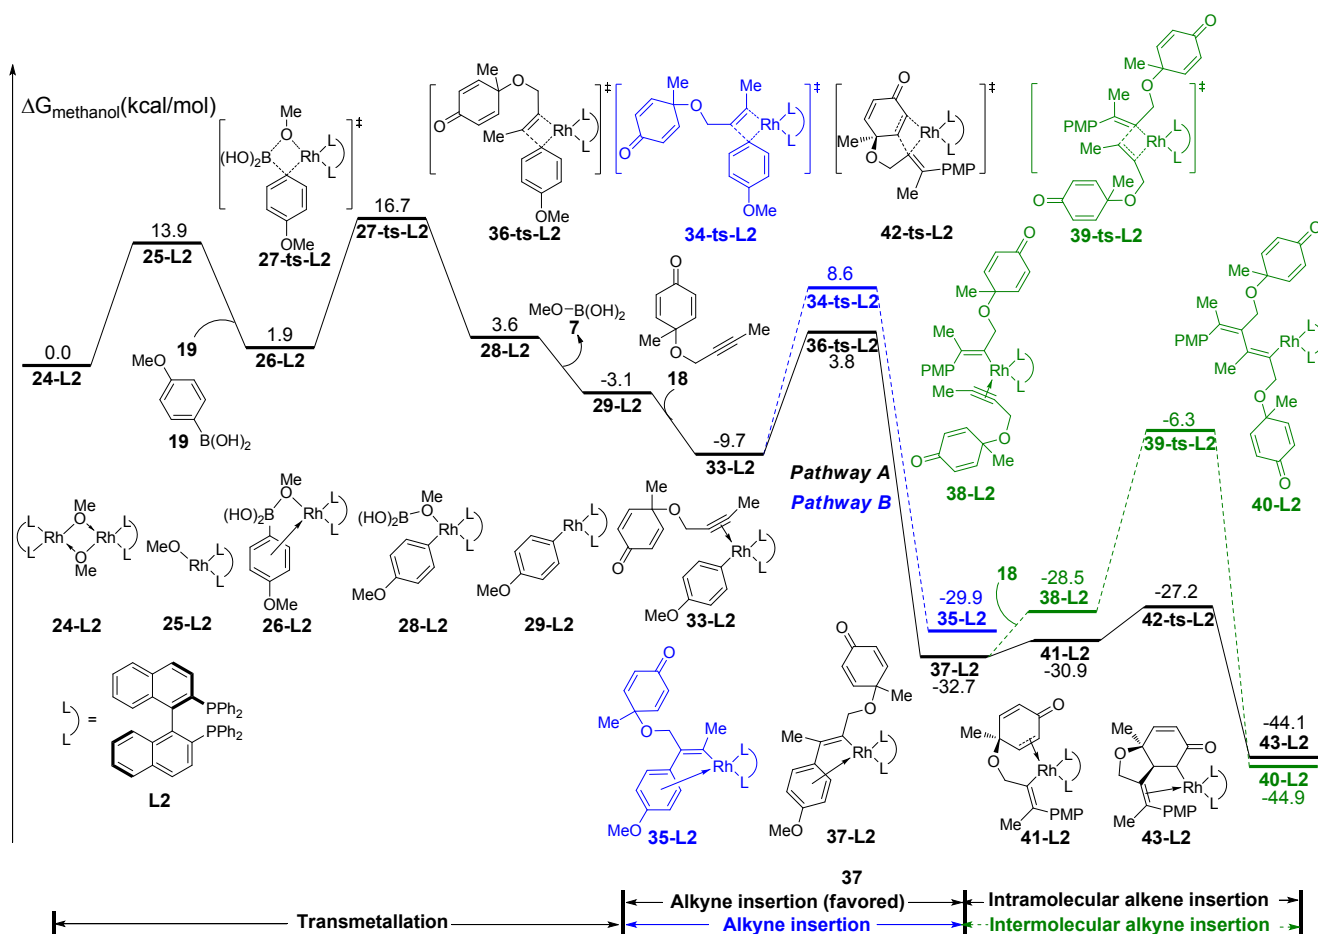

**Figure S1.** Free energy profile for rhodium-catalyzed synthesis of hydrobenzofurans with **L2** ligand.

The values given in kcal/mol are the MN12-L calculated relative free energies in methanol solvent.

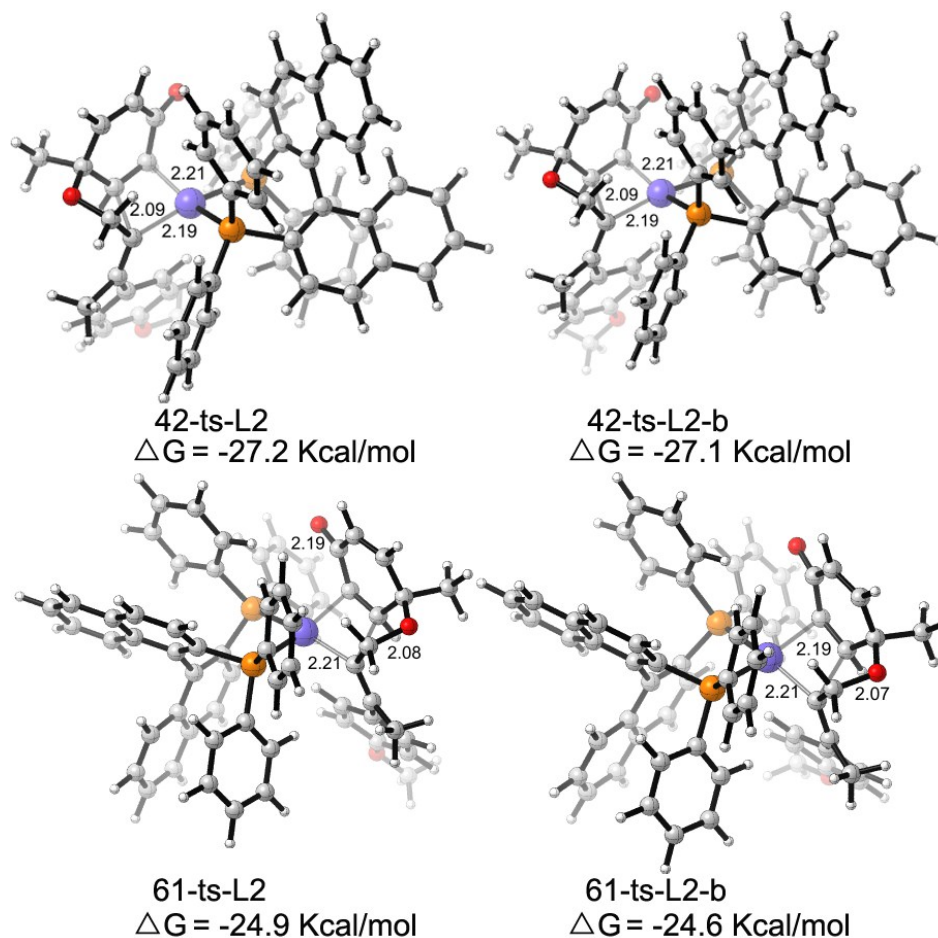

**Figure S2.** Geometries of **42-ts** and **61-ts** with **L2** ligand. The values of bond lengths are given in angstrom. The values given in kcal/mol are the MN12-L calculated relative free energies in methanol solvent.

As shown in Figure S3. After dissociation of rhodium complex **24-L3**, the complex **25-L3** undergoes transmetalation with reactant **19** via transition state **27-ts-L3** with an overall energy barrier of 14.5

kcal/mol. There are two insertion modes when intermediate **33-L3** is formed by the coordination of substrate **9**. The relative free energy of transition state **34-ts-L3** is 2.0 kcal/mol higher than **36-ts-L3**. Intermediate **37-L3** could isomerize to **41-L3** then intramolecular alkene insertion takes place in transition state **42-ts-L3** with 5.7 kcal/mol energy barrier. We also considered the competition with intermolecular alkyne insertion. When another molecule **9** coordinates with **37-L3**, the free energy decreased 1.5 kcal/mol. The following alkyne insertion would take place via **39-ts-L3** with 13.4 kcal/mol energy barrier.

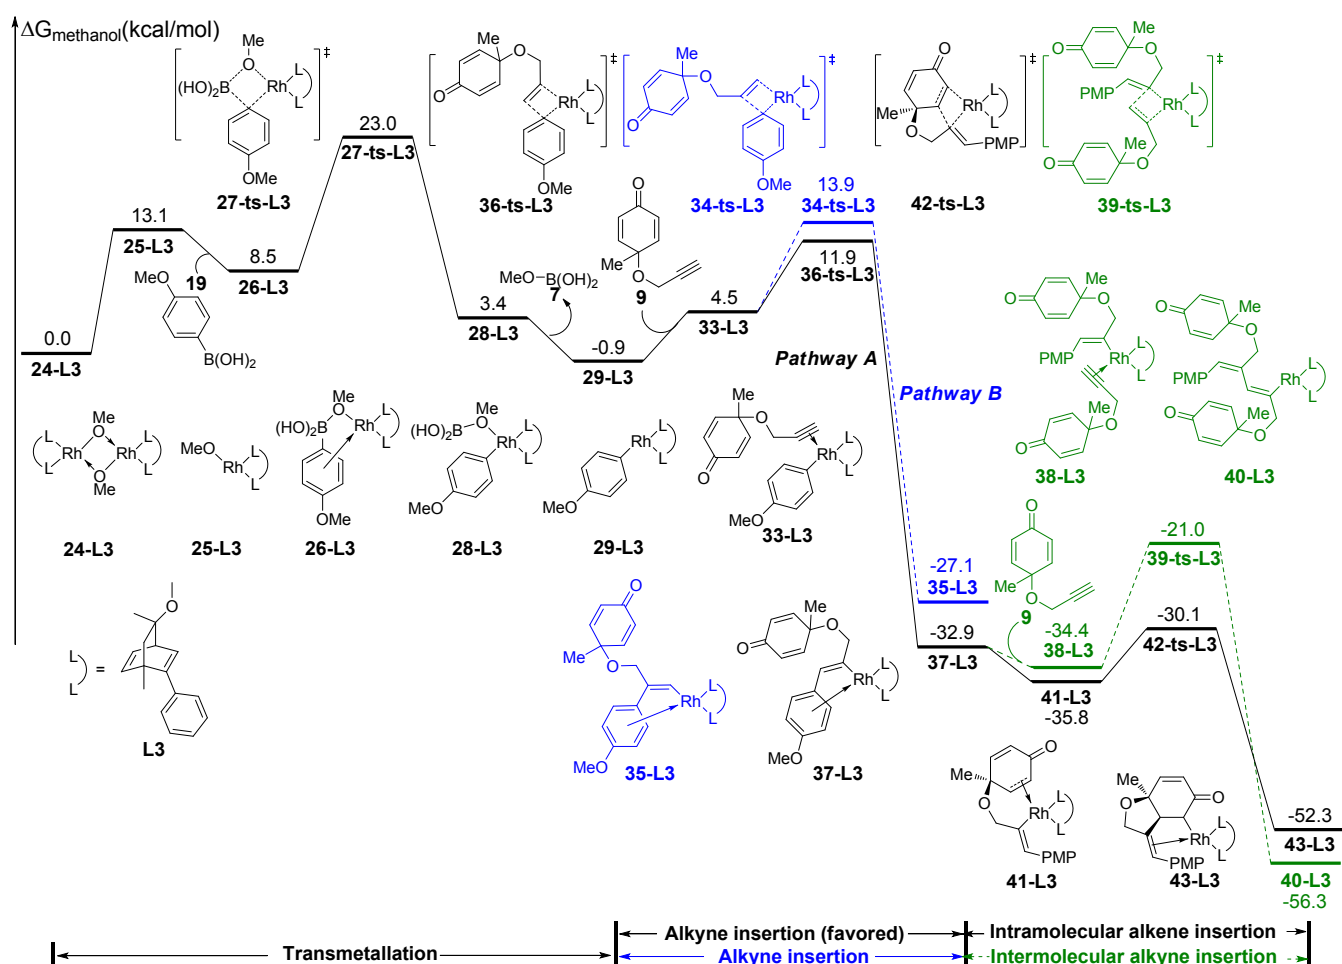

**Figure S3.** Free energy profile for rhodium-catalyzed synthesis of hydrobenzofurans with **L3** ligand.

The values given in kcal/mol are the MN12-L calculated relative free energies in methanol solvent.

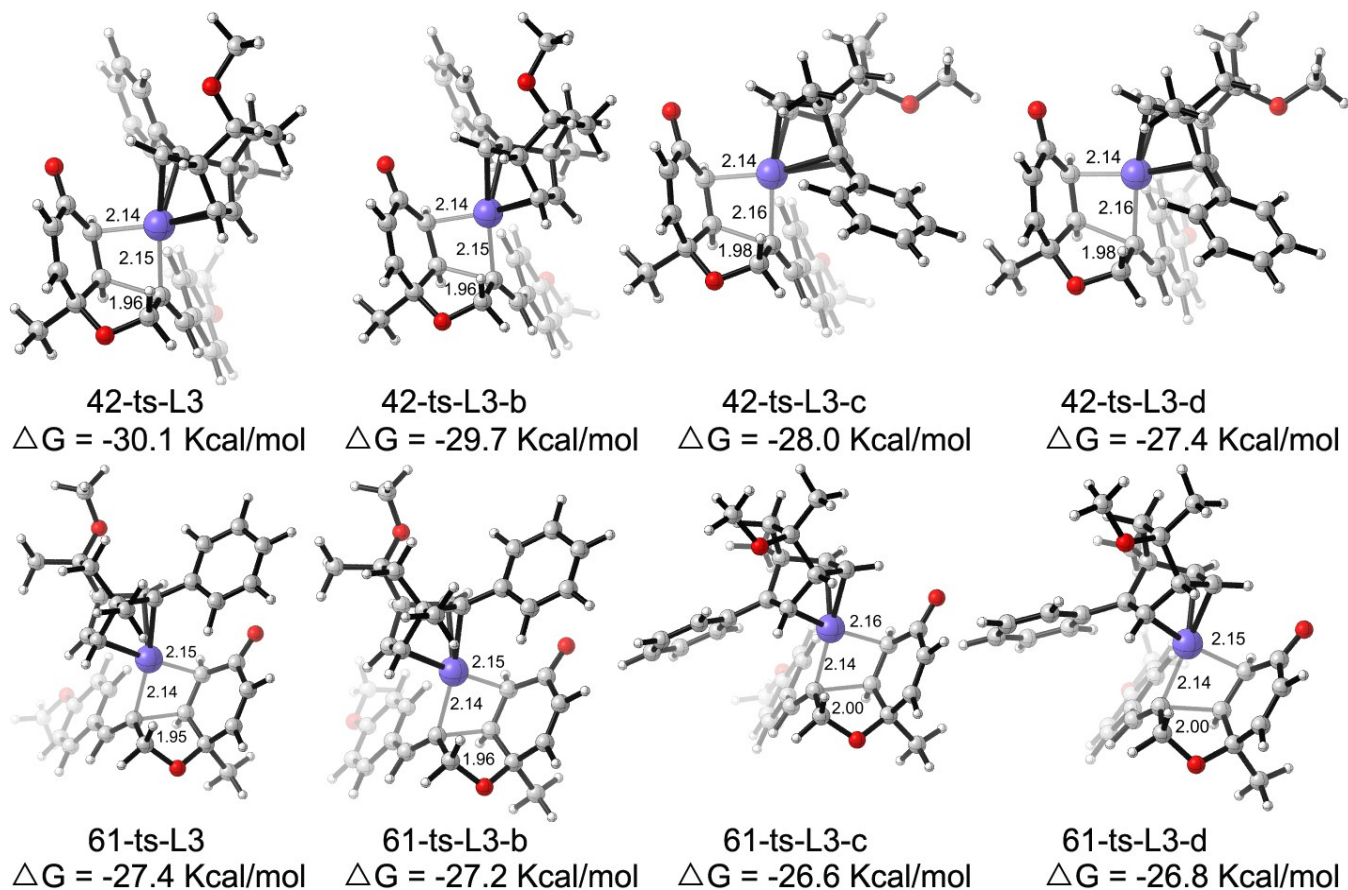

**Figure S4.** Geometries of **42-ts** and **61-ts** with **L3** ligand. The values of bond lengths are given in angstrom. The values given in kcal/mol are the MN12-L calculated relative free energies in methanol solvent.

As shown in Figure S7. After dissociation of rhodium complex **24-L4**, the complex **25-L4** undergoes transmetallation with reactant **19** via transition state **27-ts-L4** with an overall energy barrier of 15.1 kcal/mol. There are two insertion modes when intermediate **33-L4** is formed by the coordination of substrate **9**. The relative free energy of transition state **34-ts-L4** is 3.6 kcal/mol higher than **36-ts-L4**. Intermediate **37-L4** could isomerize to **41-L4** then intramolecular alkene insertion takes place in transition state **42-ts-L4** with 5.6 kcal/mol energy barrier. We also considered the competition with intermolecular alkyne insertion. When another molecule **9** coordinates with **37-L4**, the free energy decreased 0.3 kcal/mol. The following alkyne insertion would take place via **39-ts-L4** with 14.0 kcal/mol energy barrier.

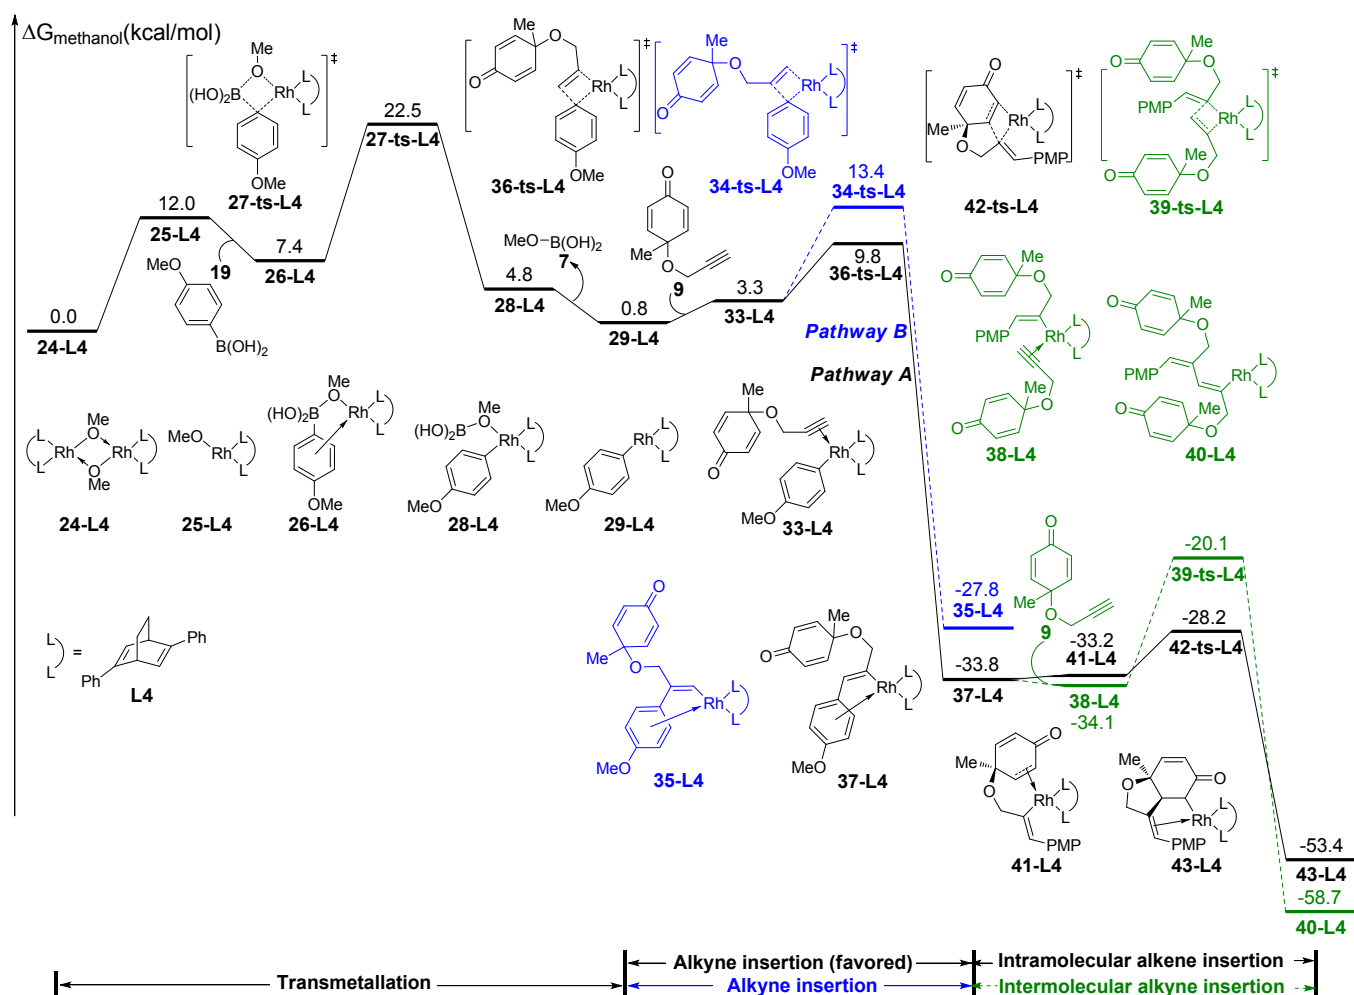

**Figure S5.** Free energy profile for rhodium-catalyzed synthesis of hydrobenzofurans with **L4** ligand.

The values given in kcal/mol are the MN12-L calculated relative free energies in methanol solvent.

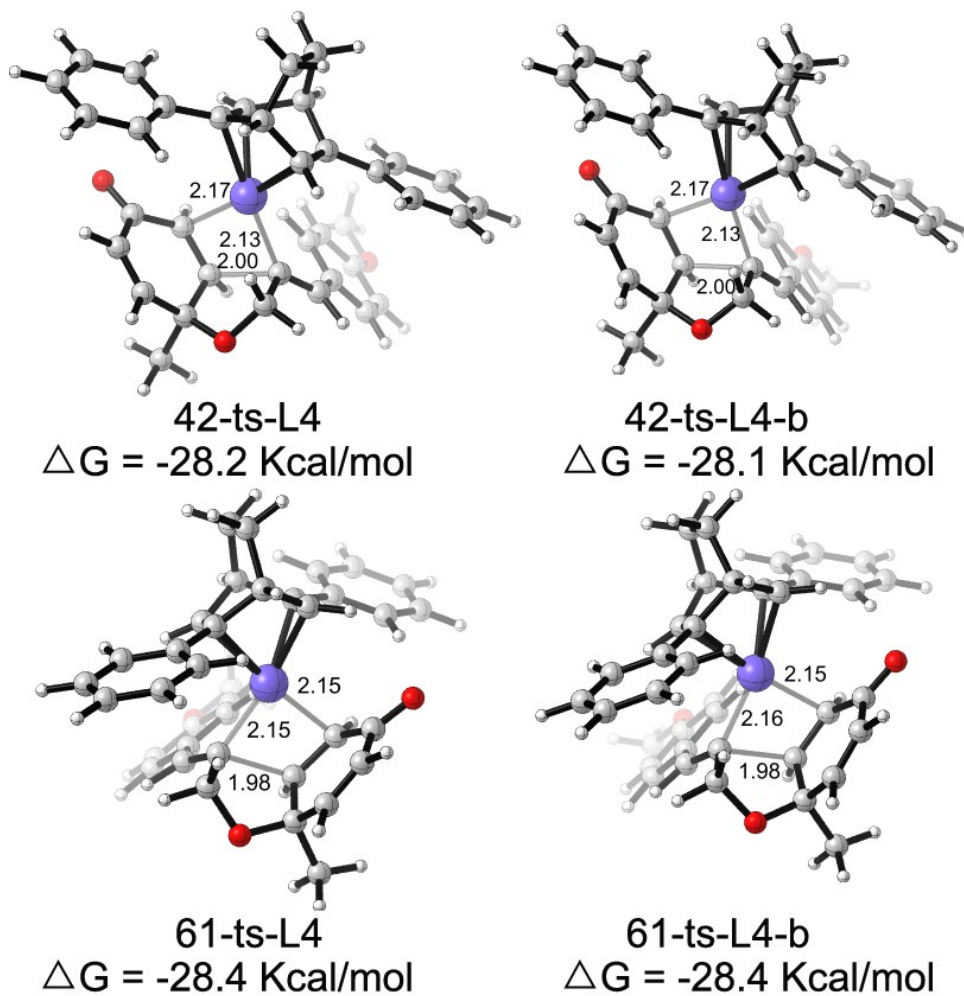

**Figure S6.** Geometries of 42-ts and 61-ts with L5 ligand. The values of bond lengths are given in angstrom. The values given in kcal/mol are the MN12-L calculated relative free energies in methanol solvent.



## 2. The calculated *ee* values by B97D3 functional, M06-L functional and M11-L functional.

Table S1. Calculated and Experimentally Observed *ee* Values with Different DFT Functional

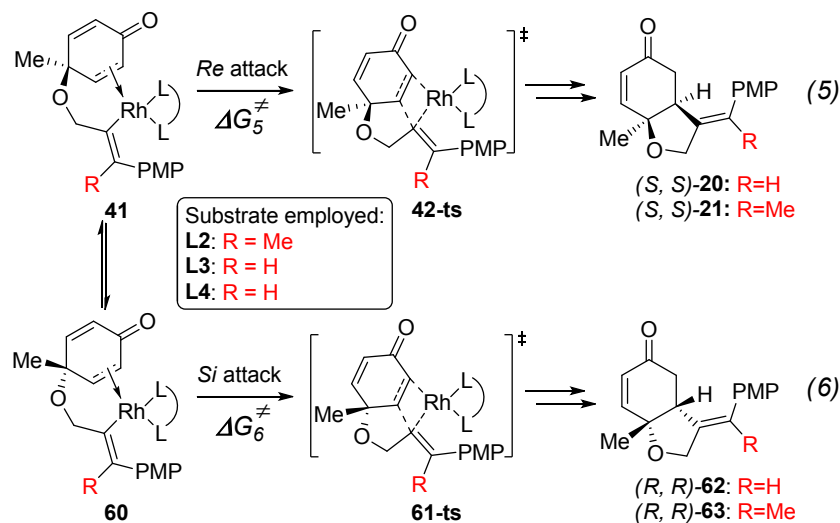

| DFT functional | ligand | $\Delta\Delta G^\ddagger = (\Delta G_5^\ddagger - \Delta G_6^\ddagger)$ | ee (calc.) | ee (exp.) |
|----------------|--------|-------------------------------------------------------------------------|------------|-----------|
| B97D3          | L2     | 0.8                                                                     | 59%        | 96%       |
| B97D3          | L3     | 1.5                                                                     | 85%        | 76%       |
| B97D3          | L4     | -0.5                                                                    | -40%       | -6%       |
| M06-L          | L2     | 1.6                                                                     | 87%        | 96%       |
| M06-L          | L3     | 2.3                                                                     | 96%        | 76%       |
| M06-L          | L4     | -0.7                                                                    | -53%       | -6%       |
| M11-L          | L2     | 0.5                                                                     | 40%        | 96%       |
| M11-L          | L3     | 2.0                                                                     | 93%        | 76%       |
| M11-L          | L4     | 0.7                                                                     | 53%        | -6%       |

## 3. B97D3, M06-L and M11-L absolute calculation free energies of 42-ts and 61-ts.

| Geometry          | $E_{B97D3(\text{Methanol})}$ | $E_{M06-L(\text{Methanol})}$ | $E_{M11-L(\text{Methanol})}$ |
|-------------------|------------------------------|------------------------------|------------------------------|
| <b>42-ts-L2</b>   | -3410.547616                 | -3411.634411                 | -3411.521496                 |
| <b>42-ts-L2-b</b> | -3410.546864                 | -3411.634167                 | -3411.521551                 |
| <b>61-ts-L2</b>   | -3410.543850                 | -3411.630019                 | -3411.518885                 |
| <b>61-ts-L2-b</b> | -3410.543836                 | -3411.629216                 | -3411.517712                 |
| <b>42-ts-L3</b>   | -1727.910248                 | -1728.515927                 | -1728.484339                 |
| <b>42-ts-L3-b</b> | -1727.910218                 | -1728.515816                 | -1728.484247                 |
| <b>42-ts-L3-c</b> | -1727.909532                 | -1728.513701                 | -1728.482576                 |
| <b>42-ts-L3-d</b> | -1727.910001                 | -1728.514287                 | -1728.483175                 |
| <b>61-ts-L3</b>   | -1727.907048                 | -1728.512945                 | -1728.481767                 |
| <b>61-ts-L3-b</b> | -1727.907093                 | -1728.512768                 | -1728.481411                 |
| <b>61-ts-L3-c</b> | -1727.908677                 | -1728.511982                 | -1728.480550                 |
| <b>61-ts-L3-d</b> | -1727.908838                 | -1728.512267                 | -1728.480786                 |
| <b>42-ts-L4</b>   | -1765.784125                 | -1766.423371                 | -1766.401089                 |
| <b>42-ts-L4-b</b> | -1765.784008                 | -1766.423333                 | -1766.401103                 |
| <b>61-ts-L4</b>   | -1765.786368                 | -1766.426032                 | -1766.401245                 |
| <b>61-ts-L4-b</b> | -1765.785559                 | -1766.425225                 | -1766.400884                 |

#### 4. B3LYP, MN12-L absolute calculation free energies.

| Geometry     | E <sub>B3LYP(elec)</sub> | E <sub>MN12-L(Methanol)</sub> | Correction of<br>H <sub>(gas phase)</sub> | Correction of<br>G <sub>(gas phase)</sub> | IF*    |
|--------------|--------------------------|-------------------------------|-------------------------------------------|-------------------------------------------|--------|
| <b>L1</b>    | -271.472318              | -271.271519                   | 0.134833                                  | 0.100910                                  | -      |
| <b>L2</b>    | -2378.638362             | -2377.514983                  | 0.660786                                  | 0.546562                                  | -      |
| <b>L3</b>    | -735.005039              | -734.469628                   | 0.345188                                  | 0.285964                                  | -      |
| <b>L4</b>    | -772.923685              | -772.380833                   | 0.337953                                  | 0.278338                                  | -      |
| <b>7</b>     | -291.765500              | -291.636595                   | 0.083734                                  | 0.046495                                  | -      |
| <b>9</b>     | -537.395200              | -537.051927                   | 0.186277                                  | 0.136075                                  | -      |
| <b>12</b>    | -115.712204              | -115.635456                   | 0.055708                                  | 0.028754                                  | -      |
| <b>18</b>    | -576.721301              | -576.337746                   | 0.216904                                  | 0.160821                                  | -      |
| <b>19</b>    | -522.773821              | -522.490962                   | 0.169162                                  | 0.121357                                  | -      |
| <b>20</b>    | -884.251081              | -883.666832                   | 0.333633                                  | 0.268545                                  | -      |
| <b>21</b>    | -923.565150              | -922.942517                   | 0.363003                                  | 0.293742                                  | -      |
| <b>22</b>    | -1421.717969             | -1420.785707                  | 0.524642                                  | 0.428957                                  | -      |
| <b>23</b>    | -1500.335733             | -1499.328606                  | 0.583819                                  | 0.480824                                  | -      |
| <b>24</b>    | -992.367464              | -990.045609                   | 0.368105                                  | 0.297583                                  | -      |
| <b>25</b>    | -496.142420              | -494.992479                   | 0.182613                                  | 0.135520                                  | -      |
| <b>26</b>    | -1018.947350             | -1017.512887                  | 0.353737                                  | 0.281566                                  | -      |
| <b>27-ts</b> | -1018.930525             | -1017.485918                  | 0.352217                                  | 0.280122                                  | -248.9 |
| <b>28</b>    | -1018.965685             | -1017.517152                  | 0.354775                                  | 0.279408                                  | -      |
| <b>29</b>    | -727.166463              | -725.866538                   | 0.268118                                  | 0.210049                                  | -      |
| <b>30</b>    | -1264.582826             | -1262.938056                  | 0.456677                                  | 0.369237                                  | -      |
| <b>31-ts</b> | -1264.551918             | -1262.902012                  | 0.455322                                  | 0.371456                                  | -278.5 |
| <b>32</b>    | -1264.606847             | -1262.957105                  | 0.457803                                  | 0.372935                                  | -      |
| <b>33</b>    | -1264.592918             | -1262.931747                  | 0.457094                                  | 0.369020                                  | -      |
| <b>34-ts</b> | -1264.578494             | -1262.914741                  | 0.455611                                  | 0.369265                                  | -297.5 |
| <b>35</b>    | -1264.643203             | -1262.983727                  | 0.458721                                  | 0.373185                                  | -      |
| <b>36-ts</b> | -1264.580950             | -1262.915387                  | 0.455697                                  | 0.368334                                  | -264.6 |
| <b>37</b>    | -1264.645579             | -1262.989320                  | 0.458635                                  | 0.372668                                  | -      |
| <b>38</b>    | -1802.056578             | -1800.065860                  | 0.646987                                  | 0.529588                                  | -      |
| <b>39-ts</b> | -1802.049049             | -1800.043384                  | 0.646272                                  | 0.528843                                  | -269.8 |
| <b>40</b>    | -1802.106902             | -1800.110221                  | 0.649854                                  | 0.535597                                  | -      |

|                 |              |              |          |          |         |
|-----------------|--------------|--------------|----------|----------|---------|
| <b>41</b>       | -1264.659833 | -1263.003971 | 0.459756 | 0.379122 | -       |
| <b>42-ts</b>    | -1264.644289 | -1262.991923 | 0.457976 | 0.377782 | -301.2  |
| <b>43</b>       | -1264.680905 | -1263.032341 | 0.460216 | 0.379823 | -       |
| <b>44</b>       | -1264.681954 | -1263.026206 | 0.460331 | 0.378696 | -       |
| <b>45</b>       | -1380.411238 | -1378.672886 | 0.518577 | 0.427259 | -       |
| <b>46-ts</b>    | -1380.400402 | -1378.648197 | 0.512930 | 0.421566 | -1228.9 |
| <b>47</b>       | -1380.418295 | -1378.672147 | 0.517985 | 0.424174 | -       |
| <b>48-ts</b>    | -1264.613349 | -1262.962652 | 0.457927 | 0.378475 | -219.1  |
| <b>49</b>       | -1264.614002 | -1262.965628 | 0.458995 | 0.378974 | -       |
| <b>50</b>       | -1802.054159 | -1800.060419 | 0.646909 | 0.528913 | -       |
| <b>51-ts</b>    | -1802.047931 | -1800.039964 | 0.646518 | 0.530763 | -294.8  |
| <b>52</b>       | -1802.112851 | -1800.112922 | 0.649958 | 0.533297 | -       |
| <b>53</b>       | -1802.124500 | -1800.120011 | 0.650721 | 0.538806 | -       |
| <b>54-ts</b>    | -1802.109153 | -1800.108340 | 0.649086 | 0.539132 | -291.6  |
| <b>55</b>       | -1802.149604 | -1800.154096 | 0.651077 | 0.540765 | -       |
| <b>56</b>       | -1802.149857 | -1800.145656 | 0.651249 | 0.540357 | -       |
| <b>57</b>       | -1917.877764 | -1915.790174 | 0.709353 | 0.589794 | -       |
| <b>58-ts</b>    | -1917.868257 | -1915.768922 | 0.703987 | 0.584951 | -1251.5 |
| <b>59</b>       | -1917.888236 | -1915.792191 | 0.709546 | 0.589932 | -       |
| <b>62</b>       | -884.251081  | -883.666831  | 0.333633 | 0.268543 | -       |
| <b>63</b>       | -923.565150  | -922.942517  | 0.363003 | 0.293742 | -       |
| <b>24-L2</b>    | -5206.685696 | -5202.561678 | 1.422942 | 1.212443 | -       |
| <b>25-L2</b>    | -2603.317540 | -2601.242062 | 0.709846 | 0.589656 | -       |
| <b>26-L2</b>    | -3126.109750 | -3123.777568 | 0.881194 | 0.736407 | -       |
| <b>27-ts-L2</b> | -3126.096927 | -3123.753310 | 0.879582 | 0.735672 | -246.4  |
| <b>28-L2</b>    | -3126.121655 | -3123.774450 | 0.881640 | 0.735950 | -       |
| <b>29-L2</b>    | -2834.341408 | -2832.120450 | 0.795045 | 0.661417 | -       |
| <b>33-L2</b>    | -3411.077802 | -3408.497181 | 1.014344 | 0.850713 | -       |
| <b>34-ts-L2</b> | -3411.065861 | -3408.467585 | 1.013106 | 0.850287 | -243.4  |
| <b>35-L2</b>    | -3411.124317 | -3408.530940 | 1.015663 | 0.852166 | -       |
| <b>36-ts-L2</b> | -3411.069029 | -3408.474594 | 1.013098 | 0.849665 | -248.7  |

|                   |              |              |          |          |        |
|-------------------|--------------|--------------|----------|----------|--------|
| <b>37-L2</b>      | -3411.124454 | -3408.536462 | 1.015555 | 0.853269 | -      |
| <b>38-L2</b>      | -3987.852734 | -3984.897499 | 1.234726 | 1.044130 | -      |
| <b>39-ts-L2</b>   | -3987.823017 | -3984.860986 | 1.233613 | 1.043004 | -219.6 |
| <b>40-L2</b>      | -3987.887874 | -3984.924657 | 1.236190 | 1.045072 | -      |
| <b>41-L2</b>      | -3411.114812 | -3408.541902 | 1.016463 | 0.861549 | -      |
| <b>42-ts-L2</b>   | -3411.109305 | -3408.536624 | 1.015071 | 0.862192 | -200.6 |
| <b>42-ts-L2-b</b> | -3411.108902 | -3408.536405 | 1.015080 | 0.862175 | -203.0 |
| <b>43-L2</b>      | -3411.137975 | -3408.563703 | 1.017431 | 0.862341 | -      |
| <b>60-L2</b>      | -3411.113676 | -3408.540183 | 1.017090 | 0.861817 | -      |
| <b>61-ts-L2</b>   | -3411.110642 | -3408.531058 | 1.015236 | 0.860385 | -233.8 |
| <b>61-ts-L2-b</b> | -3411.110794 | -3408.529943 | 1.015102 | 0.859647 | -234.6 |
| <b>24-L3</b>      | -1919.424322 | -1916.442368 | 0.788969 | 0.668189 | -      |
| <b>25 -L3</b>     | -959.671393  | -958.189213  | 0.393282 | 0.323006 | -      |
| <b>26-L3</b>      | -1482.476382 | -1480.710963 | 0.564218 | 0.467831 | -      |
| <b>27-ts-L3</b>   | -1482.460907 | -1480.685442 | 0.562772 | 0.465468 | -244.9 |
| <b>28-L3</b>      | -1482.496785 | -1480.717971 | 0.565577 | 0.466731 | -      |
| <b>29-L3</b>      | -1190.695967 | -1189.063100 | 0.478493 | 0.395073 | -      |
| <b>33-L3</b>      | -1728.122072 | -1726.130156 | 0.667595 | 0.554917 | -      |
| <b>34-ts-L3</b>   | -1728.109043 | -1726.114771 | 0.665988 | 0.554481 | -296.3 |
| <b>35-L3</b>      | -1728.171188 | -1726.183979 | 0.668917 | 0.558362 | -      |
| <b>36-ts-L3</b>   | -1728.112371 | -1726.119036 | 0.666179 | 0.555533 | -275.1 |
| <b>37-L3</b>      | -1728.175584 | -1726.193855 | 0.669016 | 0.558961 | -      |
| <b>38-L3</b>      | -2265.586016 | -2263.269696 | 0.857592 | 0.716533 | -      |
| <b>39-ts-L3</b>   | -2265.578614 | -2263.249534 | 0.857049 | 0.717829 | -284.1 |
| <b>40-L3</b>      | -2265.635383 | -2263.310182 | 0.860423 | 0.722132 | -      |
| <b>41-L3</b>      | -1728.187744 | -1726.204795 | 0.670387 | 0.565298 | -      |
| <b>42-ts-L3</b>   | -1728.172091 | -1726.194158 | 0.668539 | 0.563667 | -296.1 |
| <b>42-ts-L3-b</b> | -1728.172082 | -1726.193985 | 0.668578 | 0.564190 | -297.1 |
| <b>42-ts-L3-c</b> | -1728.173130 | -1726.190886 | 0.668726 | 0.563818 | -298.0 |
| <b>42-ts-L3-d</b> | -1728.173385 | -1726.191456 | 0.669044 | 0.565360 | -295.6 |
| <b>60-L3</b>      | -1728.180356 | -1726.198076 | 0.670323 | 0.565279 | -      |

|                   |              |              |          |          |        |
|-------------------|--------------|--------------|----------|----------|--------|
| <b>61-ts-L3</b>   | -1728.167911 | -1726.190427 | 0.668591 | 0.564311 | -295.3 |
| <b>61-ts-L3-b</b> | -1728.168045 | -1726.190020 | 0.668538 | 0.564230 | -293.1 |
| <b>61-ts-L3-c</b> | -1728.171529 | -1726.189521 | 0.668735 | 0.564623 | -281.5 |
| <b>61-ts-L3-d</b> | -1728.171659 | -1726.189836 | 0.668762 | 0.564667 | -277.3 |
| <b>24-L4</b>      | -1995.244467 | -1992.257204 | 0.773728 | 0.653676 | -      |
| <b>25-L4</b>      | -997.582774  | -996.096000  | 0.385560 | 0.313348 | -      |
| <b>26-L4</b>      | -1520.385330 | -1518.619537 | 0.556608 | 0.460038 | -      |
| <b>27-ts-L4</b>   | -1520.370379 | -1518.593618 | 0.555105 | 0.458101 | -244.6 |
| <b>28-L4</b>      | -1520.405993 | -1518.621868 | 0.557667 | 0.458121 | -      |
| <b>29-L4</b>      | -1228.607204 | -1226.967384 | 0.470956 | 0.387319 | -      |
| <b>33-L4</b>      | -1766.029832 | -1764.037381 | 0.659570 | 0.545444 | -      |
| <b>34-ts-L4</b>   | -1766.020545 | -1764.022874 | 0.658523 | 0.547124 | -299.1 |
| <b>35-L4</b>      | -1766.084093 | -1764.091482 | 0.661400 | 0.550071 | -      |
| <b>36-ts-L4</b>   | -1766.023864 | -1764.029862 | 0.658616 | 0.548361 | -272.5 |
| <b>37-L4</b>      | -1766.086953 | -1764.102750 | 0.661481 | 0.551799 | -      |
| <b>38-L4</b>      | -2303.503347 | -2301.177105 | 0.850476 | 0.709717 | -      |
| <b>39-ts-L4</b>   | -2303.490743 | -2301.157802 | 0.849863 | 0.712722 | -280.8 |
| <b>40-L4</b>      | -2303.554088 | -2301.220215 | 0.852718 | 0.713769 | -      |
| <b>41-L4</b>      | -1766.084000 | -1764.105296 | 0.662147 | 0.555229 | -      |
| <b>42-ts-L4</b>   | -1766.076626 | -1764.098379 | 0.660916 | 0.556283 | -274.3 |
| <b>42-ts-L4-b</b> | -1766.076586 | -1764.098457 | 0.660945 | 0.556516 | -275.5 |
| <b>43-L4</b>      | -1766.116254 | -1764.141667 | 0.663061 | 0.559485 | -      |
| <b>60-L4</b>      | -1766.103399 | -1764.114398 | 0.663112 | 0.558075 | -      |
| <b>61-ts-L4</b>   | -1766.088475 | -1764.100177 | 0.661623 | 0.557790 | -292.7 |
| <b>61-ts-L4-b</b> | -1766.088125 | -1764.099698 | 0.661536 | 0.557284 | -292.3 |

\* IF: The imaginary frequencies for the transition states.

## 5. B3LYP geometries for all the optimized compounds and transition states.

|           |             |            |             |          |             |             |             |
|-----------|-------------|------------|-------------|----------|-------------|-------------|-------------|
| <b>L1</b> |             |            |             | <b>C</b> | -1.24558100 | -0.66804700 | -0.52058500 |
| <b>C</b>  | -1.24551000 | 0.66814800 | -0.52059800 | <b>H</b> | -1.93682300 | -1.33862000 | -1.01905700 |
| <b>H</b>  | -1.93668900 | 1.33877500 | -1.01908700 | <b>C</b> | 0.00003800  | 1.12294600  | 0.27168300  |

|   |             |             |             |
|---|-------------|-------------|-------------|
| C | 1.24557600  | 0.66807200  | -0.52056600 |
| C | 1.24551600  | -0.66812300 | -0.52061500 |
| H | 1.93670000  | -1.33873900 | -1.01911200 |
| C | -0.00003800 | -1.12295900 | 0.27164000  |
| H | 1.93681400  | 1.33865600  | -1.01903100 |
| H | 0.00006700  | 2.16035200  | 0.61265700  |
| H | -0.00006800 | -2.16037900 | 0.61257100  |
| C | -0.00000100 | -0.00003000 | 1.35459300  |
| H | 0.89985200  | -0.00007400 | 1.97887300  |
| H | -0.89985500 | -0.00001300 | 1.97887100  |

**L2**

|   |             |             |             |
|---|-------------|-------------|-------------|
| C | 0.52727100  | -3.00883100 | -3.89851100 |
| C | -0.06114400 | -2.08075000 | -2.99819200 |
| C | 0.36836700  | -2.05573500 | -1.63043800 |
| C | 1.38163200  | -2.97329600 | -1.23063300 |
| C | 1.93276200  | -3.86102100 | -2.12770500 |
| C | 1.50271000  | -3.88256600 | -3.47593600 |
| H | 0.18999500  | -3.01420400 | -4.93246600 |
| H | 1.72290100  | -2.96631100 | -0.20161100 |
| H | 2.70603100  | -4.54977400 | -1.79860700 |
| H | 1.94539400  | -4.58846100 | -4.17359200 |
| C | -1.06587300 | -1.17255500 | -3.41781600 |
| H | -1.38870400 | -1.18740100 | -4.45649100 |
| C | -0.22633200 | -1.11731700 | -0.71799000 |
| C | -1.62304800 | -0.28447400 | -2.53092700 |
| C | -1.22311800 | -0.24883000 | -1.16476800 |
| H | -2.38001900 | 0.41247600  | -2.87590000 |
| P | -1.96009500 | 0.97979900  | 0.02424900  |
| C | -2.51029400 | 2.32244300  | -1.13081800 |
| C | -3.84997600 | 2.62742300  | -1.41316300 |
| C | -1.50500200 | 3.13843100  | -1.68288100 |
| C | -4.17581200 | 3.71312300  | -2.23154100 |
| H | -4.64446000 | 2.01704700  | -0.99529000 |
| C | -1.83136300 | 4.21267300  | -2.50892300 |
| H | -0.46020900 | 2.92506500  | -1.46633800 |
| C | -3.17014200 | 4.50609100  | -2.78422100 |
| H | -5.22004700 | 3.93458300  | -2.43827500 |
| H | -1.04010700 | 4.82653100  | -2.93181600 |
| H | -3.42557200 | 5.34905900  | -3.42101800 |
| C | -3.55787600 | 0.17551700  | 0.51181400  |
| C | -4.24963900 | -0.77202100 | -0.26044500 |
| C | -4.09474600 | 0.54478100  | 1.75606200  |
| C | -5.44656400 | -1.32640700 | 0.19674900  |
| H | -3.85055600 | -1.08147000 | -1.22180500 |
| C | -5.29655000 | -0.00153000 | 2.21013100  |
| H | -3.56061600 | 1.26081500  | 2.37603100  |
| C | -5.97448600 | -0.94062900 | 1.43115700  |
| H | -5.96810400 | -2.05999600 | -0.41310300 |
| H | -5.69640100 | 0.29841200  | 3.17530800  |
| H | -6.90613600 | -1.37405700 | 1.78556400  |
| C | 1.06586300  | -1.17213900 | 3.41795000  |
| C | 0.06119000  | -2.08041900 | 2.99839100  |
| C | -0.36826800 | -2.05557100 | 1.63061100  |
| C | 0.22643100  | -1.11724000 | 0.71808300  |
| C | 1.22317000  | -0.24867000 | 1.16480000  |
| C | 1.62303900  | -0.28413500 | 2.53097200  |
| H | 1.38864400  | -1.18681300 | 4.45664100  |

|   |             |             |             |
|---|-------------|-------------|-------------|
| H | 2.37995600  | 0.41288900  | 2.87591600  |
| C | -0.52722400 | -3.00842200 | 3.89879700  |
| H | -0.18997200 | -3.01366600 | 4.93276000  |
| C | -1.38148700 | -2.97322100 | 1.23088500  |
| H | -1.72271100 | -2.96638400 | 0.20184600  |
| C | -1.50261000 | -3.88224300 | 3.47628900  |
| C | -1.93261000 | -3.86086300 | 2.12803500  |
| H | -1.94530300 | -4.58806700 | 4.17401100  |
| H | -2.70583200 | -4.54969200 | 1.79898400  |
| P | 1.96009700  | 0.97987000  | -0.02432500 |
| C | 3.55788200  | 0.17556700  | -0.51187900 |
| C | 4.09460600  | 0.54453200  | -1.75625500 |
| C | 4.24976000  | -0.77174200 | 0.26058000  |
| C | 5.29639800  | -0.00184700 | -2.21030200 |
| H | 3.56039300  | 1.26039100  | -2.37635700 |
| C | 5.44667000  | -1.32617600 | -0.19657900 |
| H | 3.85078000  | -1.08096400 | 1.22205400  |
| C | 5.97445600  | -0.94069900 | -1.43114800 |
| H | 5.69612300  | 0.29784400  | -3.17561000 |
| H | 5.96831800  | -2.05956500 | 0.41342200  |
| H | 6.90609000  | -1.37417500 | -1.78553300 |
| C | 2.51030900  | 2.32261000  | 1.13060500  |
| C | 3.84996100  | 2.62774500  | 1.41292200  |
| C | 1.50493800  | 3.13852100  | 1.68264300  |
| C | 4.17568300  | 3.71351700  | 2.23124200  |
| H | 4.64449600  | 2.01742400  | 0.99506500  |
| C | 1.83118700  | 4.21284000  | 2.50863800  |
| H | 0.46016200  | 2.92503600  | 1.46613300  |
| C | 3.16993800  | 4.50640900  | 2.78390000  |
| H | 5.21989700  | 3.93510800  | 2.43794700  |
| H | 1.03986600  | 4.82663000  | 2.93150600  |
| H | 3.42530100  | 5.34942500  | 3.42066000  |

**L3**

|   |             |             |             |
|---|-------------|-------------|-------------|
| C | -1.85909800 | -1.79696200 | -1.20825800 |
| H | -2.48191000 | -2.40394700 | -1.85864400 |
| C | -1.12488500 | -2.26997900 | -0.19985000 |
| H | -1.06953800 | -3.31759900 | 0.08623500  |
| C | -1.78007100 | -0.28837700 | -1.36425600 |
| C | -0.31984300 | 0.11818300  | -1.41283300 |
| C | 0.44139900  | -0.35297400 | -0.41551400 |
| C | -0.36498900 | -1.20993000 | 0.59189900  |
| H | 0.04987200  | 0.78326200  | -2.18638200 |
| H | -2.35171100 | 0.09039400  | -2.21467100 |
| C | -1.47589300 | -0.22282500 | 1.13197800  |
| C | -2.34514100 | 0.34250600  | -0.03095600 |
| H | -2.09390200 | -0.75983300 | 1.86059300  |
| H | -0.98392600 | 0.59950800  | 1.66174100  |
| C | 0.42503400  | -1.79970900 | 1.76197200  |
| H | -0.25952800 | -2.28770200 | 2.46634500  |
| H | 1.14723400  | -2.55301500 | 1.43061700  |
| H | 0.97710800  | -1.02722600 | 2.30679800  |
| C | -3.83563000 | 0.02048000  | 0.14006400  |
| H | -4.23038500 | 0.41062400  | 1.08478500  |
| H | -4.41677200 | 0.45695200  | -0.68065400 |
| H | -3.99095300 | -1.06205800 | 0.14282900  |
| O | -2.14641800 | 1.75484600  | -0.21516200 |
| C | -2.64986100 | 2.61615500  | 0.78455400  |

|   |             |             |             |
|---|-------------|-------------|-------------|
| H | -2.28674000 | 2.35618100  | 1.79050000  |
| H | -2.28792600 | 3.61815600  | 0.53611100  |
| H | -3.74891400 | 2.64120400  | 0.80981800  |
| C | 1.86593800  | 0.02101900  | -0.23643900 |
| C | 2.88931200  | -0.94058100 | -0.16145800 |
| C | 2.22757300  | 1.37858400  | -0.18002700 |
| C | 4.22426000  | -0.55796000 | -0.03445700 |
| H | 2.63910800  | -1.99512700 | -0.23284000 |
| C | 3.56332500  | 1.76232800  | -0.05265400 |
| H | 1.44318600  | 2.12875700  | -0.22860700 |
| C | 4.56702600  | 0.79521300  | 0.02291800  |
| H | 4.99975200  | -1.31842100 | 0.01157400  |
| H | 3.81887600  | 2.81812000  | -0.00890800 |
| H | 5.60766600  | 1.09196700  | 0.12395500  |

**L4**

|   |             |             |             |
|---|-------------|-------------|-------------|
| C | 0.65359900  | 0.29542700  | 1.23783700  |
| C | 1.42284600  | 0.29116200  | 0.13496400  |
| C | -0.70990600 | 0.93288000  | 1.06012400  |
| C | -1.42284700 | 0.29117500  | -0.13484200 |
| C | -0.65358100 | 0.29521400  | -1.23772800 |
| C | 0.70985600  | 0.93273500  | -1.06012900 |
| H | -1.30879600 | 0.90152000  | 1.97231600  |
| C | 0.44142700  | 2.42498800  | -0.63615800 |
| C | -0.44143900 | 2.42507200  | 0.63602400  |
| H | 1.39829600  | 2.92651200  | -0.45675300 |
| H | -0.05387200 | 2.94711400  | -1.46134600 |
| H | -1.39828900 | 2.92659500  | 0.45651200  |
| H | 0.05383100  | 2.94725500  | 1.46118900  |
| H | 1.30877200  | 0.90126000  | -1.97229300 |
| H | 0.96377700  | -0.10600400 | 2.19821900  |
| H | -0.96381800 | -0.10638300 | -2.19802600 |
| C | 2.80746000  | -0.21371800 | 0.04922100  |
| C | 3.30660400  | -0.77862300 | -1.13826200 |
| C | 3.66787000  | -0.15711900 | 1.16235200  |
| C | 4.60650500  | -1.27975000 | -1.20647000 |
| H | 2.66392300  | -0.85008400 | -2.01109000 |
| C | 4.96571700  | -0.65866900 | 1.09549600  |
| H | 3.31549400  | 0.30633900  | 2.07952900  |
| C | 5.44284600  | -1.22309100 | -0.09044700 |
| H | 4.96467500  | -1.71886200 | -2.13411200 |
| H | 5.61130000  | -0.59782700 | 1.96799900  |
| H | 6.45733100  | -1.60866900 | -0.14496900 |
| C | -2.80750600 | -0.21363200 | -0.04916800 |
| C | -3.30661900 | -0.77866600 | 1.13828000  |
| C | -3.66784600 | -0.15703200 | -1.16233200 |
| C | -4.60649300 | -1.27983600 | 1.20643400  |
| H | -2.66391700 | -0.85015100 | 2.01108500  |
| C | -4.96568800 | -0.65863700 | -1.09551800 |
| H | -3.31544800 | 0.30648400  | -2.07946600 |
| C | -5.44280800 | -1.22312800 | 0.09037900  |
| H | -4.96472300 | -1.71903600 | 2.13401300  |
| H | -5.61125400 | -0.59777300 | -1.96803200 |
| H | -6.45726300 | -1.60879100 | 0.14488500  |

**7**

|   |            |             |             |
|---|------------|-------------|-------------|
| B | 0.51021000 | -0.03973400 | 0.00003700  |
| O | 0.48526800 | 1.34221500  | -0.00021800 |

|   |             |             |             |
|---|-------------|-------------|-------------|
| H | 1.35590900  | 1.75954300  | 0.00178600  |
| O | 1.65334200  | -0.80659400 | -0.00004900 |
| H | 2.47206900  | -0.29572700 | -0.00071100 |
| O | -0.66608400 | -0.72251400 | 0.00026100  |
| C | -1.90565100 | -0.03153600 | -0.00010400 |
| H | -2.01174000 | 0.60392300  | -0.88746200 |
| H | -2.69905700 | -0.78416700 | -0.00324200 |
| H | -2.01453300 | 0.59945600  | 0.89010800  |

**9**

|   |             |             |             |
|---|-------------|-------------|-------------|
| C | -0.88907200 | 1.11917500  | -0.88519400 |
| C | -1.92144100 | 0.27303700  | -1.00527300 |
| C | -2.13078300 | -0.84156900 | -0.04824600 |
| C | -1.10524900 | -0.99782900 | 1.00922300  |
| C | -0.06820900 | -0.15543500 | 1.12153400  |
| C | 0.12639500  | 1.05033700  | 0.23240400  |
| H | -0.73866800 | 1.93088900  | -1.59534300 |
| H | -2.65308800 | 0.35914700  | -1.80425700 |
| H | -1.23823700 | -1.84232600 | 1.67974100  |
| H | 0.68608700  | -0.29220900 | 1.89279900  |
| O | -3.09259800 | -1.59722100 | -0.13887600 |
| O | 1.46264500  | 1.10019700  | -0.31424900 |
| C | 0.03767800  | 2.33234000  | 1.08514700  |
| H | 0.80211800  | 2.30574300  | 1.86787900  |
| H | 0.22085800  | 3.20764100  | 0.45389900  |
| H | -0.94934900 | 2.42210000  | 1.54742000  |
| C | 1.87371700  | -0.01944400 | -1.10129900 |
| H | 1.02233800  | -0.44765700 | -1.64819600 |
| H | 2.56913600  | 0.38637500  | -1.84519700 |
| C | 2.55033600  | -1.06541500 | -0.32431400 |
| C | 3.13856500  | -1.92339400 | 0.28924000  |
| H | 3.64680400  | -2.68432500 | 0.83692800  |

**12**

|   |             |             |             |
|---|-------------|-------------|-------------|
| C | 0.66185800  | -0.01966500 | 0.00000100  |
| H | 1.07969500  | 0.99083100  | -0.00063300 |
| H | 1.03696900  | -0.54321100 | 0.89347100  |
| H | 1.03687000  | -0.54428200 | -0.89287600 |
| O | -0.74856300 | 0.12248800  | 0.00000300  |
| H | -1.13617500 | -0.76525100 | 0.00001000  |

**18**

|   |             |             |             |
|---|-------------|-------------|-------------|
| C | 1.72859200  | -0.91266700 | -0.72689200 |
| C | 2.38715600  | 0.24222200  | -0.89659100 |
| C | 2.07819000  | 1.44194200  | -0.08019000 |
| C | 0.96579000  | 1.30573200  | 0.88814200  |
| C | 0.30287300  | 0.15149600  | 1.04980100  |
| C | 0.65588300  | -1.12230000 | 0.31787500  |
| H | 1.95562800  | -1.78671600 | -1.33548600 |
| H | 3.17410600  | 0.35898800  | -1.63700400 |
| H | 0.71283400  | 2.20054700  | 1.45024600  |
| H | -0.52228100 | 0.07037600  | 1.75318500  |
| O | 2.70165400  | 2.49029100  | -0.21211800 |
| O | -0.50346700 | -1.73695300 | -0.27970800 |
| C | 1.13872500  | -2.17560200 | 1.33703400  |
| H | 0.35055800  | -2.36253300 | 2.07313000  |
| H | 1.35569200  | -3.11512700 | 0.81889000  |
| H | 2.03993100  | -1.83201300 | 1.85251700  |



|   |             |             |             |
|---|-------------|-------------|-------------|
| C | -1.22472700 | -0.95049500 | -1.23538800 |
| H | -0.53650900 | -0.31227300 | -1.80725200 |
| H | -1.65298400 | -1.67665200 | -1.93627200 |
| C | -2.29774700 | -0.14166200 | -0.64682400 |
| C | -3.20856100 | 0.50840400  | -0.18644700 |
| C | -4.30222600 | 1.30049400  | 0.37001400  |
| H | -3.95916800 | 2.29234300  | 0.68854400  |
| H | -5.09870100 | 1.44628700  | -0.36990700 |
| H | -4.74829400 | 0.80468700  | 1.24080700  |

**19**

|   |             |             |             |
|---|-------------|-------------|-------------|
| C | -0.46440400 | 1.29000200  | -0.00001500 |
| C | 0.91676800  | 1.42443100  | -0.00002600 |
| C | 1.73148800  | 0.28091100  | -0.00002500 |
| C | 1.14394600  | -0.99120700 | -0.00003100 |
| C | -0.24762000 | -1.10153700 | -0.00001600 |
| C | -1.08578300 | 0.02415600  | -0.00000900 |
| H | -1.08358500 | 2.18292400  | -0.00001600 |
| H | 1.39405200  | 2.39973900  | -0.00003100 |
| H | 1.75314300  | -1.88820200 | -0.00005100 |
| H | -0.69418100 | -2.09231100 | -0.00002400 |
| B | -2.63489700 | -0.12010500 | -0.00001900 |
| O | -3.39732700 | 1.02731000  | 0.00005600  |
| H | -4.35282800 | 0.87625500  | 0.00005200  |
| O | -3.17456400 | -1.38798200 | -0.00000400 |
| H | -4.14156700 | -1.41342000 | 0.00000800  |
| O | 3.07561700  | 0.51325200  | -0.00002200 |
| C | 3.95198300  | -0.60161600 | 0.00006600  |
| H | 3.81417900  | -1.22363800 | -0.89445200 |
| H | 4.96289800  | -0.18888000 | -0.00003800 |
| H | 3.81429900  | -1.22343600 | 0.89474100  |

**20**

|   |             |             |             |
|---|-------------|-------------|-------------|
| C | 3.83963200  | 0.70472000  | -0.36621100 |
| C | 3.16692300  | 1.77369300  | -0.81721200 |
| C | 1.78447400  | 2.07040000  | -0.38307000 |
| C | 1.22450100  | 1.19065100  | 0.72664500  |
| C | 1.72602100  | -0.26683000 | 0.69020100  |
| C | 3.27433600  | -0.37030100 | 0.54187300  |
| H | 4.86365300  | 0.52122900  | -0.69033500 |
| H | 3.61051900  | 2.47943300  | -1.51539100 |
| H | 1.45910700  | -0.75030600 | 1.63998800  |
| O | 1.15404500  | 3.00842600  | -0.84661300 |
| O | 3.48699700  | -1.63537700 | -0.10918000 |
| C | 4.02682900  | -0.41406700 | 1.87089000  |
| H | 3.68543600  | -1.27142300 | 2.46023000  |
| H | 5.10334300  | -0.52105200 | 1.70155600  |
| H | 3.85863500  | 0.50389800  | 2.44431900  |
| C | 2.44712100  | -1.79461200 | -1.07290000 |
| H | 2.72963700  | -1.32693300 | -2.03089800 |
| H | 2.31700700  | -2.86800900 | -1.24193300 |
| C | 1.22386500  | -1.12467200 | -0.46634300 |
| C | -0.01754400 | -1.34218000 | -0.93284000 |
| H | -0.08437000 | -1.96866100 | -1.82519600 |
| C | -1.32671200 | -0.87971300 | -0.44426900 |
| C | -2.38271600 | -0.73265500 | -1.35732700 |
| C | -1.61338600 | -0.63184200 | 0.91421100  |
| C | -3.65521100 | -0.32020200 | -0.96178600 |

|   |             |             |             |
|---|-------------|-------------|-------------|
| H | -2.20246300 | -0.93670200 | -2.41025400 |
| C | -2.87507500 | -0.22768500 | 1.32642700  |
| H | -0.84359700 | -0.78559400 | 1.66381900  |
| C | -3.90714100 | -0.05853400 | 0.39042000  |
| H | -4.43417500 | -0.21107800 | -1.70764900 |
| H | -3.09192800 | -0.04414300 | 2.37421100  |
| H | 0.13542800  | 1.25324100  | 0.69485200  |
| H | 1.54031300  | 1.64738700  | 1.67724300  |
| O | -5.10709100 | 0.34597900  | 0.89592500  |
| C | -6.18385900 | 0.54413000  | -0.00596800 |
| H | -5.95026100 | 1.31776800  | -0.74932800 |
| H | -7.02819400 | 0.87236500  | 0.60296300  |
| H | -6.45204200 | -0.38544300 | -0.52570200 |

**21**

|   |             |             |             |
|---|-------------|-------------|-------------|
| C | -3.59872700 | -1.04571700 | -0.38663700 |
| C | -2.80261700 | -1.83786200 | -1.12062100 |
| C | -1.36452100 | -2.00479300 | -0.81087900 |
| C | -0.88991200 | -1.37634600 | 0.49112700  |
| C | -1.59117700 | -0.04489100 | 0.81739500  |
| C | -3.13995500 | -0.16895700 | 0.76410000  |
| H | -4.65736300 | -0.95201300 | -0.62752800 |
| H | -3.17773100 | -2.39789800 | -1.97393400 |
| H | -1.31862700 | 0.24893000  | 1.84010500  |
| O | -0.62324400 | -2.65452500 | -1.53319600 |
| O | -3.59468600 | 1.16860200  | 0.49902100  |
| C | -3.78443700 | -0.60864300 | 2.07783900  |
| H | -3.52652900 | 0.10099400  | 2.87078000  |
| H | -4.87495000 | -0.63366100 | 1.98149500  |
| H | -3.44260900 | -1.60799800 | 2.36756500  |
| C | -2.67682900 | 1.76559500  | -0.41594400 |
| H | -2.99863300 | 1.59212200  | -1.45619500 |
| H | -2.69628500 | 2.84499200  | -0.23245400 |
| C | -1.32493400 | 1.12521800  | -0.13083900 |
| C | -0.15647300 | 1.56347400  | -0.63059300 |
| C | 1.17129400  | 1.00443700  | -0.23571900 |
| C | 2.02402900  | 0.41299800  | -1.17626900 |
| C | 1.62968700  | 1.09892000  | 1.09122300  |
| C | 3.27715700  | -0.08973300 | -0.81853500 |
| H | 1.69770100  | 0.31356900  | -2.20818600 |
| C | 2.87564000  | 0.60941900  | 1.46331000  |
| H | 0.99819100  | 1.57218200  | 1.83872900  |
| C | 3.70972400  | 0.00726600  | 0.50951200  |
| H | 3.89657300  | -0.55658200 | -1.57571500 |
| H | 3.22905300  | 0.68551500  | 2.48706900  |
| H | 0.19513500  | -1.27635900 | 0.45643700  |
| H | -1.11850000 | -2.09596200 | 1.29247300  |
| O | 4.91121700  | -0.44559000 | 0.97173500  |
| C | 5.78864000  | -1.07718900 | 0.05360300  |
| H | 5.33655700  | -1.97747500 | -0.38330900 |
| H | 6.67173200  | -1.36037700 | 0.62944300  |
| H | 6.08687400  | -0.39616000 | -0.75475000 |
| C | -0.09279900 | 2.71567300  | -1.61350000 |
| H | 0.44513800  | 3.56866500  | -1.17819400 |
| H | 0.46522700  | 2.42572300  | -2.51297700 |
| H | -1.07999600 | 3.06067300  | -1.93277900 |

**22**

|   |             |             |             |           |             |             |             |
|---|-------------|-------------|-------------|-----------|-------------|-------------|-------------|
| C | -3.23190600 | -2.98060200 | -1.48659500 | H         | -4.07013600 | 7.15874000  | 0.86526600  |
| C | -4.52833800 | -3.14019000 | -1.18757300 | H         | -4.74683700 | 5.51148500  | 0.99744700  |
| C | -4.99227800 | -3.30956000 | 0.21105800  |           |             |             |             |
| C | -3.94793200 | -3.24408000 | 1.26198200  | <b>23</b> |             |             |             |
| C | -2.65238800 | -3.08204400 | 0.95909400  | C         | -4.07796700 | -2.61660600 | -0.04112100 |
| C | -2.12571200 | -3.00768300 | -0.45682300 | C         | -5.33558300 | -2.43352900 | -0.46658000 |
| H | -2.90395500 | -2.84631100 | -2.51638400 | C         | -6.12090500 | -1.23394300 | -0.08700900 |
| H | -5.30298400 | -3.14635100 | -1.94962200 | C         | -5.41992800 | -0.22741800 | 0.74541400  |
| H | -4.29795200 | -3.32719500 | 2.28742400  | C         | -4.16039300 | -0.41314900 | 1.16503900  |
| H | -1.89353900 | -3.02043400 | 1.73769500  | C         | -3.35833200 | -1.66362600 | 0.88485400  |
| O | -6.17606700 | -3.47792700 | 0.48397000  | H         | -3.50976500 | -3.49935000 | -0.33192900 |
| O | -1.25233100 | -1.87551100 | -0.61192000 | H         | -5.84062100 | -3.14809900 | -1.11108100 |
| C | -1.21320600 | -4.22329300 | -0.72134700 | H         | -5.98416200 | 0.67024100  | 0.98369800  |
| H | -0.38729100 | -4.22616000 | -0.00285500 | H         | -3.64510100 | 0.34078700  | 1.75796300  |
| H | -0.79428100 | -4.15542300 | -1.73047100 | O         | -7.28053600 | -1.07757400 | -0.45579700 |
| H | -1.77384900 | -5.15744900 | -0.62694800 | O         | -2.05811800 | -1.32490000 | 0.36699900  |
| C | -1.85437500 | -0.59610300 | -0.46403100 | C         | -3.05088200 | -2.37911800 | 2.21689200  |
| H | -2.48808800 | -0.57384800 | 0.43650300  | H         | -2.48426800 | -1.70794300 | 2.86982200  |
| H | -2.52409400 | -0.38488300 | -1.31347400 | H         | -2.44063200 | -3.26740900 | 2.02421600  |
| C | -0.80133800 | 0.48787000  | -0.37108800 | H         | -3.97420900 | -2.67950100 | 2.72033600  |
| C | 0.51500200  | 0.18410200  | -0.44615400 | C         | -2.03960300 | -0.65910600 | -0.90759000 |
| C | -1.35025400 | 1.86299600  | -0.22673800 | H         | -2.78775500 | 0.14177800  | -0.92283600 |
| C | -1.02314500 | 2.87729400  | -1.14909200 | H         | -2.30000100 | -1.36744500 | -1.70451600 |
| C | -2.24891000 | 2.18972100  | 0.79911200  | C         | -0.65409300 | -0.06577900 | -1.09152400 |
| C | -1.55621300 | 4.15441700  | -1.04124900 | C         | 0.39802100  | -0.83275600 | -1.46493800 |
| H | -0.35065000 | 2.64733700  | -1.97049300 | C         | -0.55929400 | 1.38844000  | -0.75709300 |
| C | -2.79234900 | 3.47040000  | 0.92311000  | C         | -1.23224000 | 2.34541000  | -1.54384800 |
| H | -2.51891100 | 1.44040000  | 1.53853600  | C         | 0.12727100  | 1.84431400  | 0.37286300  |
| C | -2.44643200 | 4.46303000  | -0.00138300 | C         | -1.19201000 | 3.69763900  | -1.23199300 |
| H | -1.30586500 | 4.93122000  | -1.75716300 | H         | -1.78394100 | 2.02371400  | -2.42459200 |
| H | -3.47376900 | 3.67972800  | 1.73973100  | C         | 0.16986600  | 3.20249700  | 0.70513600  |
| C | 3.62457800  | -0.50955900 | -0.63738000 | H         | 0.60787700  | 1.13565300  | 1.03722700  |
| C | 3.28322300  | -1.68801900 | 0.29956400  | C         | -0.48563800 | 4.13798800  | -0.10129300 |
| C | 3.82190900  | -1.54299600 | 1.71549800  | H         | -1.70128300 | 4.43393100  | -1.84618300 |
| C | 5.13351600  | -0.87377700 | 1.84227500  | H         | 0.70720300  | 3.50521900  | 1.59674300  |
| C | 5.73249400  | -0.28552900 | 0.79580600  | C         | 3.09557700  | -1.72544900 | -0.04888300 |
| C | 5.13610700  | -0.12609200 | -0.59009600 | C         | 2.25558100  | -1.52441300 | 1.22728700  |
| H | 3.38739000  | -0.81738100 | -1.66525900 | C         | 2.70014700  | -0.35279000 | 2.09151700  |
| H | 5.58959300  | -0.89352000 | 2.82912000  | C         | 4.14329800  | -0.04256700 | 2.09740900  |
| H | 6.70771600  | 0.18560000  | 0.91530300  | C         | 5.00406900  | -0.65520100 | 1.27132100  |
| O | 3.23745400  | -2.00912800 | 2.68205600  | C         | 4.62804600  | -1.67445100 | 0.21531000  |
| O | 5.16476700  | 1.27992400  | -0.89754700 | H         | 2.87726500  | -2.72656700 | -0.44343000 |
| C | 5.99223400  | -0.83457400 | -1.63851700 | H         | 4.46533600  | 0.71646000  | 2.80614200  |
| H | 7.03231800  | -0.49717800 | -1.57985100 | H         | 6.06477300  | -0.40747500 | 1.29774300  |
| H | 5.61289300  | -0.60524200 | -2.63962700 | O         | 1.91205400  | 0.27504800  | 2.78753100  |
| H | 5.97370000  | -1.91968100 | -1.48934000 | O         | 5.19187800  | -1.23806400 | -1.03076600 |
| C | 4.02402700  | 1.87111900  | -0.27366800 | C         | 5.24967400  | -3.03412800 | 0.53738600  |
| C | 2.93363400  | 0.82229100  | -0.36189100 | H         | 6.33245700  | -2.94058500 | 0.67110100  |
| C | 1.61992900  | 1.11461000  | -0.29908200 | H         | 5.06535100  | -3.72758100 | -0.28965900 |
| H | 0.75440600  | -0.85932700 | -0.61343500 | H         | 4.82479300  | -3.45199500 | 1.45654500  |
| H | 4.24997400  | 2.13722900  | 0.77273800  | C         | 4.30009100  | -0.28335400 | -1.60588400 |
| H | 3.78961000  | 2.79223500  | -0.81614500 | C         | 2.90249700  | -0.70510000 | -1.17238800 |
| H | 1.35329600  | 2.15515800  | -0.11999000 | C         | 1.76613700  | -0.27626300 | -1.75510400 |
| H | 2.21000200  | -1.87343200 | 0.36402600  | H         | 4.54517800  | 0.73481200  | -1.26032200 |
| H | 3.73653600  | -2.60258600 | -0.11324900 | H         | 4.45383700  | -0.31960200 | -2.68835300 |
| O | -2.91596300 | 5.74296800  | 0.01830700  | H         | 1.19120400  | -1.41300200 | 1.00512700  |
| C | -3.82693600 | 6.10950700  | 1.04233400  | H         | 2.35166000  | -2.42247200 | 1.85731800  |
| H | -3.37776700 | 6.00513700  | 2.03885300  | O         | -0.50854800 | 5.48439900  | 0.12497800  |

|   |             |             |             |
|---|-------------|-------------|-------------|
| C | 0.17474200  | 5.98231700  | 1.26338200  |
| H | 1.24979300  | 5.76251800  | 1.21832000  |
| H | 0.02723500  | 7.06398500  | 1.25263000  |
| H | -0.23624500 | 5.56948400  | 2.19428000  |
| C | 1.80732300  | 0.71724800  | -2.90239900 |
| H | 1.45916500  | 0.24269900  | -3.83072500 |
| H | 1.14087300  | 1.56310000  | -2.71079100 |
| H | 2.80823100  | 1.11668700  | -3.08393900 |
| C | 0.25599000  | -2.31274100 | -1.76598700 |
| H | 0.95045500  | -2.90855500 | -1.16458300 |
| H | -0.74438100 | -2.69700400 | -1.56471100 |
| H | 0.50706300  | -2.51396500 | -2.81617300 |

**24**

|    |             |             |             |
|----|-------------|-------------|-------------|
| C  | -2.88808800 | 1.18113500  | 0.93570300  |
| H  | -2.40344600 | 1.99864400  | 1.45840700  |
| C  | -3.34402400 | 1.18224100  | -0.39730900 |
| H  | -3.28034900 | 1.99867000  | -1.10868400 |
| C  | -3.60098200 | -0.00033000 | 1.63299700  |
| C  | -2.88804100 | -1.18155800 | 0.93528700  |
| C  | -3.34397200 | -1.18213900 | -0.39771000 |
| H  | -3.28017800 | -1.99826600 | -1.10942400 |
| C  | -4.33383900 | 0.00002400  | -0.51327900 |
| H  | -2.40328900 | -1.99919800 | 1.45767800  |
| H  | -3.59729000 | -0.00051500 | 2.72381300  |
| H  | -4.99854600 | 0.00015100  | -1.37817100 |
| C  | -4.97013400 | -0.00021000 | 0.90230700  |
| H  | -5.56496600 | -0.89933300 | 1.10519500  |
| H  | -5.56497500 | 0.89884300  | 1.10549200  |
| Rh | -1.55897500 | 0.00007800  | -0.25898600 |
| O  | 0.00008600  | -1.29492700 | -0.78884800 |
| C  | 0.00004000  | -2.67974500 | -0.55910800 |
| H  | -0.00100700 | -2.93918300 | 0.51272000  |
| H  | -0.88683600 | -3.14179900 | -1.01849200 |
| H  | 0.88798100  | -3.14159000 | -1.01664600 |
| C  | 2.88781900  | -1.18144100 | 0.93533500  |
| H  | 2.40297800  | -1.99903800 | 1.45771300  |
| C  | 3.34399300  | -1.18218500 | -0.39760200 |
| H  | 3.28039900  | -1.99841200 | -1.10921800 |
| C  | 3.60071300  | -0.00021700 | 1.63308600  |
| C  | 2.88800800  | 1.18126200  | 0.93557500  |
| C  | 3.34417800  | 1.18219900  | -0.39733700 |
| H  | 3.28054000  | 1.99850800  | -1.10885400 |
| C  | 4.33394200  | -0.00005400 | -0.51306000 |
| H  | 2.40324700  | 1.99881200  | 1.45810200  |
| H  | 3.59683100  | -0.00033000 | 2.72390100  |
| H  | 4.99881100  | -0.00000500 | -1.37782700 |
| C  | 4.96999000  | -0.00026300 | 0.90263900  |
| H  | 5.56487200  | 0.89875000  | 1.10587200  |
| H  | 5.56470800  | -0.89942900 | 1.10568500  |
| Rh | 1.55902600  | 0.00006800  | -0.25918400 |
| O  | -0.00008300 | 1.29520600  | -0.78857100 |
| C  | 0.00004400  | 2.68002100  | -0.55891800 |
| H  | -0.00111000 | 2.93953500  | 0.51289500  |
| H  | 0.88811000  | 3.14169900  | -1.01638100 |
| H  | -0.88669800 | 3.14221800  | -1.01843000 |

**25**

|    |             |             |             |
|----|-------------|-------------|-------------|
| C  | -1.44864500 | -1.02295400 | -0.68594900 |
| H  | -1.49072000 | -1.89227800 | -1.33333000 |
| C  | -1.44186600 | -1.00717200 | 0.71455500  |
| H  | -1.47842800 | -1.86145000 | 1.38198800  |
| C  | -1.79747000 | 0.41481100  | -1.13553300 |
| C  | -0.48993800 | 1.12503800  | -0.72935300 |
| C  | -0.48321300 | 1.14204600  | 0.70086200  |
| H  | 0.08540400  | 1.81977200  | 1.32968700  |
| C  | -1.78650800 | 0.44043600  | 1.13512700  |
| H  | 0.07453000  | 1.78592800  | -1.37953700 |
| H  | -2.12332100 | 0.54042600  | -2.16859300 |
| H  | -2.10259100 | 0.58925300  | 2.16814500  |
| C  | -2.75669800 | 0.86328100  | -0.00052200 |
| H  | -2.96320100 | 1.94055100  | -0.01165600 |
| H  | -3.69822700 | 0.30155900  | 0.01030000  |
| Rh | 0.57379000  | -0.53062400 | 0.00050900  |
| O  | 2.47124900  | -0.16971300 | -0.00990500 |
| C  | 3.18520100  | 1.02940900  | 0.00628600  |
| H  | 2.90665000  | 1.70026300  | -0.82556800 |
| H  | 3.05394900  | 1.58833600  | 0.94958200  |
| H  | 4.26023000  | 0.81403100  | -0.09752400 |

**26**

|    |             |             |             |
|----|-------------|-------------|-------------|
| C  | -0.08921500 | -2.11392400 | -0.56246600 |
| H  | 0.81208100  | -2.08488300 | -1.16374400 |
| C  | -0.17650000 | -1.97305500 | 0.83085700  |
| H  | 0.64547800  | -1.82254900 | 1.52092100  |
| C  | -1.43931600 | -2.70949400 | -1.02395800 |
| C  | -2.36043400 | -1.49592100 | -0.77540200 |
| C  | -2.44841200 | -1.35141400 | 0.62701700  |
| H  | -3.19916900 | -0.79531100 | 1.17797700  |
| C  | -1.58191200 | -2.47950700 | 1.22914500  |
| H  | -3.02498000 | -1.06661400 | -1.51759500 |
| H  | -1.46574700 | -3.14812700 | -2.02183200 |
| H  | -1.74007000 | -2.70720700 | 2.28359800  |
| C  | -1.79707200 | -3.61089100 | 0.18819500  |
| H  | -2.83032100 | -3.97799800 | 0.16076700  |
| H  | -1.10281400 | -4.45000000 | 0.31741800  |
| Rh | -0.84119800 | -0.14390900 | -0.09672200 |
| O  | -1.63059500 | 1.75969800  | -0.35996300 |
| C  | -2.94857500 | 2.20550300  | -0.10410900 |
| H  | -3.11128000 | 3.15903500  | -0.61994300 |
| H  | -3.66093600 | 1.46802500  | -0.49049800 |
| H  | -3.11481300 | 2.34420800  | 0.97216100  |
| C  | 1.29176100  | 1.13973700  | -1.26753600 |
| C  | 0.80937200  | 1.53751700  | 0.01129300  |
| C  | 1.55882800  | 1.08176800  | 1.12159100  |
| C  | 2.71599600  | 0.30998600  | 0.98804400  |
| C  | 3.16370900  | -0.04642600 | -0.29382600 |
| C  | 2.44241700  | 0.36953100  | -1.42360100 |
| H  | 0.77451700  | 1.50261500  | -2.15260500 |
| H  | 1.23102100  | 1.38337300  | 2.11262300  |
| H  | 3.26483900  | 0.00644700  | 1.87330600  |
| H  | 2.81493700  | 0.09405100  | -2.40622700 |
| B  | -0.43617400 | 2.61748000  | 0.16174200  |
| O  | -0.60487600 | 2.95387300  | 1.55836200  |
| H  | -1.05262100 | 3.81039500  | 1.60466400  |
| O  | -0.38685700 | 3.74977100  | -0.73849200 |

|   |            |             |             |
|---|------------|-------------|-------------|
| H | 0.35115400 | 4.32015100  | -0.48125800 |
| O | 4.28116500 | -0.78652300 | -0.54552200 |
| C | 5.07424700 | -1.20913800 | 0.55243300  |
| H | 5.91094200 | -1.76227600 | 0.12159600  |
| H | 5.45983400 | -0.35534500 | 1.12464100  |
| H | 4.51269100 | -1.86963400 | 1.22665700  |

**27-ts**

|    |             |             |             |
|----|-------------|-------------|-------------|
| C  | -1.05120900 | -1.99531100 | -0.55057500 |
| H  | -0.18593200 | -2.29894900 | -1.12877500 |
| C  | -1.10593100 | -1.81289300 | 0.84477400  |
| H  | -0.29222900 | -1.95602100 | 1.54623500  |
| C  | -2.51578500 | -2.15081400 | -1.02053700 |
| C  | -3.04709100 | -0.71775600 | -0.78850800 |
| C  | -3.10181800 | -0.53709300 | 0.59323600  |
| H  | -3.62293900 | 0.24518100  | 1.13413900  |
| C  | -2.60347000 | -1.85748600 | 1.22523400  |
| H  | -3.51143800 | -0.10154000 | -1.55066500 |
| H  | -2.66906300 | -2.57165100 | -2.01506800 |
| H  | -2.83628400 | -2.01036100 | 2.27977700  |
| C  | -3.13861500 | -2.89030900 | 0.19527600  |
| H  | -4.23424500 | -2.93227900 | 0.15806400  |
| H  | -2.72751000 | -3.89632800 | 0.34272500  |
| Rh | -1.11458800 | 0.09921800  | -0.10943500 |
| O  | -1.12755000 | 2.19959100  | -0.35165200 |
| C  | -2.16008800 | 3.08299800  | 0.08378900  |
| H  | -2.02546000 | 4.05810100  | -0.39814000 |
| H  | -3.11801700 | 2.65781700  | -0.22731600 |
| H  | -2.13751400 | 3.20566500  | 1.17036700  |
| C  | 1.65958500  | 0.24300400  | -1.33100000 |
| C  | 1.03108100  | 0.49282700  | -0.08220800 |
| C  | 1.78191000  | 0.13731800  | 1.05646500  |
| C  | 3.05850400  | -0.42979800 | 0.98495900  |
| C  | 3.63212700  | -0.67076300 | -0.27028100 |
| C  | 2.92297900  | -0.32555100 | -1.43350800 |
| H  | 1.14568400  | 0.52313500  | -2.24816300 |
| H  | 1.36218700  | 0.33436700  | 2.04027600  |
| H  | 3.59255000  | -0.67173900 | 1.89809400  |
| H  | 3.39145900  | -0.50789200 | -2.39687300 |
| B  | 0.23925400  | 2.40806500  | 0.11424100  |
| O  | 0.29950800  | 2.69953900  | 1.49239700  |
| H  | 1.07744600  | 3.23994700  | 1.68352800  |
| O  | 1.00806900  | 3.13534700  | -0.81243600 |
| H  | 1.95401000  | 2.98397200  | -0.68542100 |
| O  | 4.86702600  | -1.21698200 | -0.46967500 |
| C  | 5.62313000  | -1.60369200 | 0.66538100  |
| H  | 5.10071100  | -2.36561500 | 1.25917000  |
| H  | 6.55323600  | -2.02391700 | 0.27761400  |
| H  | 5.85526500  | -0.74505600 | 1.30973800  |

**28**

|   |             |             |             |
|---|-------------|-------------|-------------|
| C | -1.21261500 | -2.20034700 | -0.31405500 |
| H | -0.37375000 | -2.77124300 | -0.69700100 |
| C | -1.40268700 | -1.79033400 | 1.03285500  |
| H | -0.73365600 | -1.98178600 | 1.86493700  |
| C | -2.62932500 | -2.22832800 | -0.94051000 |
| C | -2.99805800 | -0.72723300 | -0.96943000 |
| C | -3.18250100 | -0.33689600 | 0.33978500  |

|    |             |             |             |
|----|-------------|-------------|-------------|
| H  | -3.58796800 | 0.60015100  | 0.70367700  |
| C  | -2.92524000 | -1.58555900 | 1.21046400  |
| H  | -3.23802900 | -0.16849300 | -1.86715100 |
| H  | -2.73389500 | -2.76966400 | -1.88194500 |
| H  | -3.29312600 | -1.54470700 | 2.23677000  |
| C  | -3.47593700 | -2.69909200 | 0.27539700  |
| H  | -4.55695700 | -2.62333000 | 0.10525200  |
| H  | -3.21737000 | -3.71018100 | 0.61229300  |
| Rh | -0.93158900 | -0.12307200 | -0.16698500 |
| O  | -0.88597900 | 2.18672800  | -0.40534200 |
| C  | -1.74173900 | 2.80405700  | -1.37727200 |
| H  | -1.59361500 | 3.88546600  | -1.37848200 |
| H  | -1.48756300 | 2.38942700  | -2.35546500 |
| H  | -2.78842400 | 2.58055400  | -1.14708200 |
| C  | 1.87493500  | -1.11582400 | 0.67539100  |
| C  | 1.11592600  | -0.19774100 | -0.07320100 |
| C  | 1.85953800  | 0.64842900  | -0.93277000 |
| C  | 3.24456100  | 0.57211200  | -1.04843400 |
| C  | 3.96291100  | -0.35492200 | -0.28126200 |
| C  | 3.27075900  | -1.20075200 | 0.59138500  |
| H  | 1.37926600  | -1.80586400 | 1.35590400  |
| H  | 1.34121200  | 1.39407300  | -1.53282200 |
| H  | 3.79415100  | 1.22511600  | -1.72118300 |
| H  | 3.79847700  | -1.92635000 | 1.20197700  |
| B  | -0.45475000 | 2.90217000  | 0.71409500  |
| O  | -0.89295900 | 4.19064900  | 0.86565000  |
| H  | -0.50135600 | 4.58121700  | 1.66026100  |
| O  | 0.36821900  | 2.32197600  | 1.62024400  |
| H  | 0.64351500  | 1.42403000  | 1.33687600  |
| O  | 5.32188700  | -0.35016800 | -0.45440400 |
| C  | 6.09232100  | -1.26357400 | 0.30409100  |
| H  | 7.13260200  | -1.08994000 | 0.02032500  |
| H  | 5.97918900  | -1.09279400 | 1.38362400  |
| H  | 5.82611400  | -2.30575200 | 0.07930800  |

**29**

|    |             |             |             |
|----|-------------|-------------|-------------|
| C  | -3.20872200 | -0.77730000 | -0.68756500 |
| H  | -3.35107500 | -1.62196000 | -1.35222100 |
| C  | -3.20870600 | -0.77724400 | 0.68769400  |
| H  | -3.35102700 | -1.62184900 | 1.35242400  |
| C  | -3.18914100 | 0.70182400  | -1.13344400 |
| C  | -1.76717400 | 1.14655500  | -0.71711000 |
| C  | -1.76715500 | 1.14659900  | 0.71704400  |
| H  | -1.12296900 | 1.74693200  | 1.35171000  |
| C  | -3.18910800 | 0.70191500  | 1.13345000  |
| H  | -1.12300800 | 1.74686400  | -1.35182200 |
| H  | -3.47603800 | 0.89897500  | -2.16731400 |
| H  | -3.47597300 | 0.89915000  | 2.16731100  |
| C  | -4.03769600 | 1.34604600  | -0.00001300 |
| H  | -3.99484300 | 2.44173200  | -0.00006100 |
| H  | -5.08193400 | 1.01111700  | 0.00001200  |
| Rh | -0.98007200 | -0.64569500 | 0.00000400  |
| C  | 0.97636700  | -0.23768800 | -0.00008600 |
| C  | 1.65175600  | 0.99093500  | -0.00004200 |
| C  | 1.77369700  | -1.40217400 | -0.00007000 |
| C  | 3.04905900  | 1.07097500  | 0.00002000  |
| H  | 1.08759400  | 1.92268100  | -0.00007100 |
| C  | 3.16518700  | -1.34868500 | -0.00000500 |

|   |            |             |             |
|---|------------|-------------|-------------|
| H | 1.30195900 | -2.38962700 | -0.00009800 |
| C | 3.81108300 | -0.10441200 | 0.00002900  |
| H | 3.52904500 | 2.04416800  | 0.00009900  |
| H | 3.77186100 | -2.24994600 | 0.00001400  |
| O | 5.18051900 | -0.14661100 | 0.00012300  |
| C | 5.88623200 | 1.08023700  | -0.00004300 |
| H | 6.94648900 | 0.81828000  | -0.00006300 |
| H | 5.66241800 | 1.67847100  | -0.89414900 |
| H | 5.66251000 | 1.67869200  | 0.89393300  |

**30**

|    |             |             |             |
|----|-------------|-------------|-------------|
| C  | 0.85926300  | 3.07309600  | 0.73570500  |
| H  | 1.24692700  | 3.00286400  | 1.74543300  |
| C  | 1.45271600  | 2.63394300  | -0.41470300 |
| H  | 2.41213500  | 2.14483900  | -0.51750100 |
| C  | -0.41222600 | 3.84542300  | 0.31179500  |
| C  | -1.34527700 | 2.74332400  | -0.25304200 |
| C  | -0.72887900 | 2.28165700  | -1.42536900 |
| H  | -1.21061400 | 1.74686100  | -2.23566300 |
| C  | 0.56843100  | 3.10809700  | -1.58575500 |
| H  | -2.39263600 | 2.64214500  | 0.00645200  |
| H  | -0.84771200 | 4.50320900  | 1.06473800  |
| H  | 1.02899800  | 3.09435100  | -2.57473000 |
| C  | 0.09225200  | 4.47787800  | -1.01752000 |
| H  | -0.71133600 | 4.93419700  | -1.60713000 |
| H  | 0.91117300  | 5.19318200  | -0.87566100 |
| Rh | -0.20158200 | 0.98591400  | 0.26729000  |
| C  | -1.86853700 | -0.17289100 | 0.21572400  |
| C  | -2.44229600 | -0.73633000 | -0.93101600 |
| C  | -2.54786000 | -0.37719400 | 1.43390400  |
| C  | -3.63824000 | -1.46853300 | -0.88538700 |
| H  | -1.95650500 | -0.61993600 | -1.89807000 |
| C  | -3.73935900 | -1.09775100 | 1.49869900  |
| H  | -2.15195900 | 0.03994800  | 2.35962300  |
| C  | -4.29392700 | -1.64933500 | 0.33590700  |
| H  | -4.03953000 | -1.88688400 | -1.80270800 |
| H  | -4.25767000 | -1.24592200 | 2.44216300  |
| C  | 0.92651400  | -1.08208000 | 0.02889900  |
| C  | 1.07435300  | -0.53623200 | 1.29595100  |
| C  | 2.36337100  | 0.05138600  | 1.73603100  |
| C  | 3.48826900  | -0.03147500 | 0.77100000  |
| C  | 3.36626500  | -0.61632300 | -0.43032100 |
| C  | 2.08545900  | -1.23269500 | -0.94467700 |
| H  | 0.08406000  | -1.72800700 | -0.19286900 |
| H  | 0.35500400  | -0.74567300 | 2.08841700  |
| H  | 4.43081000  | 0.39053300  | 1.11054300  |
| H  | 4.22040500  | -0.68987800 | -1.10037500 |
| O  | 2.50963600  | 0.56366900  | 2.84298500  |
| O  | 2.27552600  | -2.65426600 | -1.18927900 |
| C  | 1.75016700  | -0.69388800 | -2.34248400 |
| H  | 2.56999100  | -0.92492700 | -3.03058400 |
| H  | 0.84092700  | -1.17834300 | -2.71108200 |
| H  | 1.58700300  | 0.38537200  | -2.31502100 |
| C  | 2.75574000  | -3.45558400 | -0.10879300 |
| H  | 2.41401200  | -3.06624200 | 0.85937300  |
| H  | 2.28948500  | -4.43847600 | -0.24421300 |
| C  | 4.21634600  | -3.60731400 | -0.10395100 |
| C  | 5.41285300  | -3.77171000 | -0.10137000 |

|   |             |             |             |
|---|-------------|-------------|-------------|
| H | 6.47067900  | -3.90617500 | -0.09513300 |
| O | -5.46660800 | -2.34109900 | 0.50213500  |
| C | -6.06883600 | -2.91106700 | -0.64406700 |
| H | -6.97918900 | -3.40297400 | -0.29468800 |
| H | -6.33480300 | -2.14641800 | -1.38741000 |
| H | -5.41625100 | -3.65661900 | -1.11965000 |

**31-ts**

|    |             |             |             |
|----|-------------|-------------|-------------|
| C  | -2.10226300 | -2.81329900 | -0.64439700 |
| H  | -1.54936100 | -3.47858900 | -1.29799000 |
| C  | -1.96396600 | -2.69196800 | 0.73615500  |
| H  | -1.25185800 | -3.21654700 | 1.36348200  |
| C  | -3.45033200 | -2.14826200 | -1.00888000 |
| C  | -3.17239500 | -0.65381700 | -0.72053400 |
| C  | -3.04293700 | -0.53856100 | 0.65825500  |
| H  | -3.05305900 | 0.37491100  | 1.24052100  |
| C  | -3.23271700 | -1.95940000 | 1.23603300  |
| H  | -3.31783100 | 0.15129600  | -1.43110100 |
| H  | -3.85860200 | -2.38473600 | -1.99255400 |
| H  | -3.44030700 | -2.02527500 | 2.30488200  |
| C  | -4.29124900 | -2.52314500 | 0.24534100  |
| H  | -5.25171700 | -1.99575300 | 0.29349000  |
| H  | -4.44683500 | -3.60355400 | 0.35151600  |
| Rh | -1.02076800 | -0.93694900 | -0.20996500 |
| C  | -0.37782000 | 1.09209000  | -0.38305700 |
| C  | -0.33464700 | 1.71508500  | 0.87775400  |
| C  | -0.70296500 | 1.90299500  | -1.49030000 |
| C  | -0.66366500 | 3.06499400  | 1.04826300  |
| H  | -0.04973000 | 1.13969600  | 1.75494100  |
| C  | -1.01369000 | 3.24941900  | -1.34279400 |
| H  | -0.72364800 | 1.47058200  | -2.48880700 |
| C  | -1.00296600 | 3.84079200  | -0.06853700 |
| H  | -0.63995100 | 3.49786600  | 2.04278500  |
| H  | -1.26906600 | 3.86915000  | -2.19765100 |
| C  | 1.24969300  | -0.22096900 | -0.93163400 |
| C  | 1.01039700  | -1.56955000 | -0.50791000 |
| C  | 1.50201300  | -2.02398700 | 0.80641300  |
| C  | 2.23833500  | -1.01313400 | 1.61887800  |
| C  | 2.71969100  | 0.11979800  | 1.08397600  |
| C  | 2.48756800  | 0.50350100  | -0.36062000 |
| H  | 1.14307200  | -0.02801800 | -1.99549800 |
| H  | 0.84774800  | -2.34736100 | -1.25310400 |
| H  | 2.44909200  | -1.29477300 | 2.64761800  |
| H  | 3.34037400  | 0.79066100  | 1.67366500  |
| O  | 1.36367900  | -3.17635900 | 1.22287700  |
| O  | 3.56513000  | 0.04056400  | -1.24870200 |
| C  | 2.55665500  | 2.01703100  | -0.57276000 |
| H  | 3.57398200  | 2.34370100  | -0.33565400 |
| H  | 2.35862300  | 2.25604400  | -1.62144500 |
| H  | 1.85064800  | 2.56292700  | 0.05094500  |
| C  | 4.29215200  | -1.14894500 | -0.96390800 |
| H  | 3.64414800  | -1.95433300 | -0.59897900 |
| H  | 4.68561200  | -1.47209000 | -1.93507300 |
| C  | 5.41067900  | -0.93851700 | -0.03448500 |
| C  | 6.35326500  | -0.77151300 | 0.70211200  |
| H  | 7.17840200  | -0.62597400 | 1.36160800  |
| O  | -1.32546300 | 5.16641200  | -0.02728000 |
| C  | -1.32326200 | 5.81971100  | 1.23109600  |

|           |             |             |             |
|-----------|-------------|-------------|-------------|
| H         | -1.60413100 | 6.85561900  | 1.03192500  |
| H         | -2.05243000 | 5.37307300  | 1.92034500  |
| H         | -0.32881500 | 5.79714200  | 1.69665100  |
| <b>32</b> |             |             |             |
| C         | 2.66596000  | -0.39712500 | 0.16722800  |
| H         | 2.44283900  | 0.65525300  | 0.04152800  |
| C         | 2.53203800  | -1.15050300 | 1.34389700  |
| H         | 2.20436300  | -0.78651600 | 2.31129200  |
| C         | 3.58706900  | -1.21479900 | -0.76678200 |
| C         | 2.65795600  | -2.39829100 | -1.11896000 |
| C         | 2.52368800  | -3.15273900 | 0.05347700  |
| H         | 2.14717800  | -4.16639800 | 0.13623900  |
| C         | 3.36884600  | -2.43422000 | 1.13107200  |
| H         | 2.40725400  | -2.71197900 | -2.12625600 |
| H         | 4.03274700  | -0.67825200 | -1.60544900 |
| H         | 3.61492900  | -3.01216200 | 2.02275400  |
| C         | 4.53556900  | -1.88351000 | 0.26585300  |
| H         | 5.15758100  | -2.67486200 | -0.17025500 |
| H         | 5.16405300  | -1.16183100 | 0.80162200  |
| Rh        | 0.93003100  | -1.67792500 | -0.00290600 |
| C         | -0.51269100 | 1.73515200  | 0.56391200  |
| C         | 0.04709100  | 1.91151200  | -0.70732300 |
| C         | -0.06261700 | 2.58212800  | 1.58841100  |
| C         | 1.00555800  | 2.89699600  | -0.96052000 |
| H         | -0.26907500 | 1.27291900  | -1.52682300 |
| C         | 0.90106300  | 3.56015000  | 1.36148000  |
| H         | -0.47595700 | 2.47414000  | 2.58896100  |
| C         | 1.44026100  | 3.72962300  | 0.07976600  |
| H         | 1.40212200  | 3.00366800  | -1.96416300 |
| H         | 1.24577100  | 4.20865000  | 2.16109100  |
| C         | -1.58024900 | 0.68054300  | 0.85829500  |
| C         | -1.07581200 | -0.74805500 | 0.64627700  |
| C         | -1.38001300 | -1.43658100 | -0.54530700 |
| C         | -2.26467700 | -0.82104800 | -1.54933300 |
| C         | -3.01579800 | 0.24525600  | -1.23065700 |
| C         | -2.95178100 | 0.93419000  | 0.12020800  |
| H         | -1.83788400 | 0.79335900  | 1.91699200  |
| H         | -0.89813200 | -1.35953500 | 1.53417600  |
| H         | -2.33961200 | -1.31498700 | -2.51464400 |
| H         | -3.73907500 | 0.63870500  | -1.94170700 |
| O         | -0.80915400 | -2.57962300 | -0.77932600 |
| O         | -4.03547600 | 0.49830500  | 0.99038900  |
| C         | -3.25435800 | 2.42991900  | -0.04322900 |
| H         | -4.26450300 | 2.54258400  | -0.44927300 |
| H         | -3.21859400 | 2.93035100  | 0.92938700  |
| H         | -2.54226700 | 2.91965000  | -0.71115800 |
| C         | -4.46639600 | -0.85903800 | 0.98794200  |
| H         | -3.63379900 | -1.55453300 | 0.83513300  |
| H         | -4.85298200 | -1.03671500 | 1.99902900  |
| C         | -5.53399400 | -1.12899400 | 0.01378100  |
| C         | -6.43202100 | -1.35832800 | -0.76096300 |
| H         | -7.21733800 | -1.55928700 | -1.45355400 |
| O         | 2.37113300  | 4.72110200  | -0.05217800 |
| C         | 2.94572400  | 4.93517400  | -1.32987000 |
| H         | 3.65070300  | 5.75977200  | -1.20796400 |
| H         | 3.48605600  | 4.04717900  | -1.68525500 |
| H         | 2.18769000  | 5.21467600  | -2.07393000 |

**33**

|    |             |             |             |
|----|-------------|-------------|-------------|
| C  | 4.41887100  | -0.00013700 | -0.27442900 |
| C  | 4.62185200  | 0.01966300  | 1.05021400  |
| C  | 4.18101900  | -1.09607200 | 1.92217400  |
| C  | 3.45452800  | -2.20170400 | 1.25386400  |
| C  | 3.25031100  | -2.21645100 | -0.07102800 |
| C  | 3.77174100  | -1.15266700 | -1.00863800 |
| H  | 4.73469900  | 0.82892800  | -0.90567000 |
| H  | 5.11137200  | 0.85123600  | 1.54984600  |
| H  | 3.09499400  | -2.99519600 | 1.90339800  |
| H  | 2.70945900  | -3.03117700 | -0.54693200 |
| O  | 4.39598800  | -1.09796700 | 3.12981400  |
| O  | 2.73667200  | -0.66442800 | -1.88665500 |
| C  | 4.79818900  | -1.78278400 | -1.97265500 |
| H  | 4.32295800  | -2.59023500 | -2.53860100 |
| H  | 5.14845000  | -1.02570400 | -2.68133800 |
| H  | 5.65361100  | -2.18340000 | -1.42141300 |
| C  | 1.60559200  | -0.04663600 | -1.26657400 |
| H  | 1.86762900  | 0.39881700  | -0.30045400 |
| H  | 1.30134700  | 0.77614500  | -1.92030500 |
| C  | 0.46965500  | -0.98106900 | -1.10828200 |
| C  | -0.18693300 | -2.03853200 | -1.21458900 |
| H  | -0.35244800 | -3.06520700 | -1.48211300 |
| C  | -3.28592900 | -2.25091000 | -0.73674300 |
| H  | -3.10119300 | -2.72488900 | -1.69288300 |
| C  | -2.76336600 | -2.59598500 | 0.49187500  |
| H  | -2.07598900 | -3.40197800 | 0.71738300  |
| C  | -4.39907800 | -1.21507000 | -0.46795400 |
| C  | -3.59645000 | 0.01384700  | 0.01377200  |
| C  | -3.06210400 | -0.33799200 | 1.26457900  |
| H  | -2.69939600 | 0.34323700  | 2.02420700  |
| C  | -3.54068300 | -1.77902900 | 1.54657000  |
| H  | -3.72458400 | 1.01631100  | -0.37434100 |
| H  | -5.10525900 | -1.04584400 | -1.28163700 |
| H  | -3.46011400 | -2.12435800 | 2.57781600  |
| C  | -4.94785400 | -1.74662900 | 0.88641100  |
| H  | -5.63481900 | -1.04588100 | 1.37533600  |
| H  | -5.41110900 | -2.73796800 | 0.80614200  |
| Rh | -1.58030800 | -0.75570300 | -0.27166000 |
| C  | -0.86163600 | 1.18596700  | -0.07121300 |
| C  | -0.25319600 | 1.63208200  | 1.11786800  |
| C  | -1.07553200 | 2.14689100  | -1.06809200 |
| C  | 0.10974700  | 2.96561000  | 1.30424600  |
| H  | -0.05410200 | 0.92816700  | 1.92370400  |
| C  | -0.71881200 | 3.49433300  | -0.90010400 |
| H  | -1.53389500 | 1.85717200  | -2.01216000 |
| C  | -0.12257500 | 3.90861500  | 0.29439500  |
| H  | 0.57667900  | 3.29826400  | 2.22741000  |
| H  | -0.91067800 | 4.19830300  | -1.70352100 |
| O  | 0.27018100  | 5.19385600  | 0.57196200  |
| C  | 0.04265100  | 6.18345400  | -0.41259800 |
| H  | 0.41729000  | 7.11980000  | 0.00679000  |
| H  | 0.58306100  | 5.96444300  | -1.34441200 |
| H  | -1.02686800 | 6.29321600  | -0.64094700 |

**34-ts**

|   |             |             |            |
|---|-------------|-------------|------------|
| C | -3.99438900 | -1.28987400 | 1.28641200 |
|---|-------------|-------------|------------|

|    |             |             |             |
|----|-------------|-------------|-------------|
| C  | -4.83392300 | -0.33156300 | 1.70229600  |
| C  | -5.54202200 | 0.55454000  | 0.74688500  |
| C  | -5.23451900 | 0.35047000  | -0.68914400 |
| C  | -4.39288200 | -0.60814800 | -1.10044100 |
| C  | -3.72572500 | -1.59542300 | -0.16965200 |
| H  | -3.47070800 | -1.92771200 | 1.99712500  |
| H  | -5.03259200 | -0.15109700 | 2.75536800  |
| H  | -5.72386600 | 1.02943400  | -1.38224000 |
| H  | -4.16225500 | -0.74007700 | -2.15656200 |
| O  | -6.32665700 | 1.41817400  | 1.12557400  |
| O  | -2.31161500 | -1.66490000 | -0.42591800 |
| C  | -4.22979000 | -3.01791200 | -0.49141500 |
| H  | -3.99926800 | -3.26120600 | -1.53338600 |
| H  | -3.71949000 | -3.74166600 | 0.15191800  |
| H  | -5.30942200 | -3.09335300 | -0.33370900 |
| C  | -1.58541700 | -0.45720400 | -0.19305200 |
| H  | -2.00538800 | 0.37180600  | -0.77908500 |
| H  | -1.63953000 | -0.16222000 | 0.86403300  |
| C  | -0.17055300 | -0.70781200 | -0.58541800 |
| C  | 0.61483900  | -1.54841700 | -1.14793300 |
| H  | 0.59525600  | -2.50463200 | -1.64746400 |
| C  | 3.79298000  | 0.90467500  | 0.17860100  |
| H  | 3.65685600  | 1.91964100  | -0.17353700 |
| C  | 3.35780800  | 0.36530500  | 1.38525400  |
| H  | 2.81657900  | 0.87845200  | 2.17087700  |
| C  | 4.82993000  | -0.09162900 | -0.39174300 |
| C  | 3.95155200  | -1.31379900 | -0.74914000 |
| C  | 3.51878800  | -1.84920300 | 0.45978700  |
| H  | 3.07812200  | -2.82546300 | 0.62386700  |
| C  | 4.12474000  | -0.96258600 | 1.57182800  |
| H  | 3.92482600  | -1.78916400 | -1.72239100 |
| H  | 5.47832000  | 0.28461800  | -1.18422700 |
| H  | 4.12833500  | -1.38496600 | 2.57778900  |
| C  | 5.48986800  | -0.59627400 | 0.92237300  |
| H  | 6.14380400  | -1.46386900 | 0.77036400  |
| H  | 6.02590400  | 0.19138900  | 1.46540500  |
| Rh | 2.00677900  | -0.36534000 | -0.24201500 |
| C  | 0.58816000  | 1.21254000  | -0.24685000 |
| C  | 0.16707700  | 1.87512900  | 0.91930600  |
| C  | 0.48397300  | 1.91878600  | -1.46346900 |
| C  | -0.29142100 | 3.19473800  | 0.89234800  |
| H  | 0.20890700  | 1.36284800  | 1.87777800  |
| C  | 0.04678000  | 3.23990100  | -1.50418300 |
| H  | 0.74966000  | 1.42310200  | -2.39331100 |
| C  | -0.34709500 | 3.88830100  | -0.32534400 |
| H  | -0.59588800 | 3.67044000  | 1.81843400  |
| H  | -0.01768200 | 3.78420700  | -2.44197100 |
| O  | -0.77854700 | 5.17632700  | -0.46798000 |
| C  | -1.22327600 | 5.86791200  | 0.68687000  |
| H  | -0.42118800 | 5.97339700  | 1.42990100  |
| H  | -1.52821000 | 6.85867500  | 0.34449400  |
| H  | -2.08156700 | 5.36641400  | 1.15376100  |

**35**

|   |             |             |             |
|---|-------------|-------------|-------------|
| C | -4.90806200 | 1.02092200  | -0.46166300 |
| C | -5.51143800 | -0.17259500 | -0.55068100 |
| C | -5.00948600 | -1.35599100 | 0.18923900  |
| C | -3.76904300 | -1.15817000 | 0.97234800  |

|    |             |             |             |
|----|-------------|-------------|-------------|
| C  | -3.15725000 | 0.03333900  | 1.04653600  |
| C  | -3.70964700 | 1.29262000  | 0.41941000  |
| H  | -5.27782700 | 1.88370300  | -1.01363100 |
| H  | -6.39129500 | -0.33399000 | -1.16791500 |
| H  | -3.37451400 | -2.04104300 | 1.46842500  |
| H  | -2.23501700 | 0.15826600  | 1.60869300  |
| O  | -5.58307700 | -2.44019600 | 0.13968700  |
| O  | -2.71208400 | 2.02593100  | -0.30855000 |
| C  | -4.12954900 | 2.26339900  | 1.54629600  |
| H  | -3.26460700 | 2.48969000  | 2.17819500  |
| H  | -4.49066400 | 3.19896700  | 1.10738800  |
| H  | -4.91947300 | 1.82535300  | 2.16282800  |
| C  | -2.06714300 | 1.35388400  | -1.41744900 |
| H  | -2.72748600 | 0.57961400  | -1.82500500 |
| H  | -1.95286000 | 2.13803900  | -2.17663600 |
| C  | -0.72447600 | 0.75338200  | -1.06906500 |
| C  | -0.46824400 | -0.57709500 | -1.03543300 |
| H  | -1.26984200 | -1.28335900 | -1.27000200 |
| C  | 0.41772000  | 1.64696700  | -0.74278700 |
| C  | 1.73075300  | 1.25537700  | -1.11728500 |
| C  | 0.29173700  | 2.84400300  | -0.01849800 |
| C  | 2.85254700  | 1.99693600  | -0.74003600 |
| H  | 1.85535100  | 0.45494100  | -1.86310800 |
| C  | 1.40695700  | 3.60049800  | 0.34410200  |
| H  | -0.69685400 | 3.17247900  | 0.28364800  |
| C  | 2.69903600  | 3.17277700  | 0.00154000  |
| H  | 3.85046300  | 1.69736400  | -1.04526200 |
| H  | 1.25965600  | 4.51695000  | 0.90525500  |
| C  | 0.83058600  | -2.84726600 | 0.66263100  |
| H  | -0.18957700 | -2.91773400 | 1.02584500  |
| C  | 1.26770400  | -3.16546800 | -0.65431800 |
| H  | 0.63918400  | -3.51477800 | -1.46709000 |
| C  | 2.06787800  | -3.03880100 | 1.57395400  |
| C  | 2.99534600  | -1.88792000 | 1.12555800  |
| C  | 3.41650300  | -2.19132400 | -0.14333000 |
| H  | 4.16180900  | -1.67414400 | -0.73621700 |
| C  | 2.76408700  | -3.53958800 | -0.52111400 |
| H  | 3.32666300  | -1.07143500 | 1.75660100  |
| H  | 1.87493400  | -3.11330000 | 2.64519100  |
| H  | 3.20790200  | -4.07069300 | -1.36445900 |
| C  | 2.76020800  | -4.23962400 | 0.86837400  |
| H  | 3.76746600  | -4.44429800 | 1.25138000  |
| H  | 2.15686600  | -5.15496000 | 0.88692100  |
| Rh | 1.33891700  | -1.08131600 | -0.35894800 |
| O  | 3.85071300  | 3.83565900  | 0.31985400  |
| C  | 3.74760500  | 5.05242000  | 1.04005900  |
| H  | 3.28323400  | 4.90287400  | 2.02417000  |
| H  | 4.77073200  | 5.40790200  | 1.17614100  |
| H  | 3.17410100  | 5.80556100  | 0.48306300  |

**36-ts**

|   |            |             |             |
|---|------------|-------------|-------------|
| C | 4.49070100 | -0.00643900 | -1.12118600 |
| C | 5.31864000 | 0.82892300  | -0.47814400 |
| C | 5.73330400 | 0.58979700  | 0.92550200  |
| C | 5.14473700 | -0.59791000 | 1.59014500  |
| C | 4.31584600 | -1.42938300 | 0.94313500  |
| C | 3.94254900 | -1.27779300 | -0.51417500 |
| H | 4.18487600 | 0.18462000  | -2.14892800 |

|           |             |             |             |           |             |             |             |
|-----------|-------------|-------------|-------------|-----------|-------------|-------------|-------------|
| H         | 5.72171500  | 1.72227700  | -0.94769500 | O         | 6.89663900  | 0.87816800  | -0.61972800 |
| H         | 5.42042200  | -0.74653900 | 2.63079700  | O         | 2.43445200  | -1.82615800 | 0.32155700  |
| H         | 3.87881500  | -2.29187600 | 1.44436900  | C         | 4.20859700  | -3.33497000 | 0.62538300  |
| O         | 6.50778600  | 1.34139800  | 1.50877900  | H         | 3.82065300  | -3.56298600 | 1.62325100  |
| O         | 2.51669200  | -1.35703200 | -0.68652500 | H         | 3.73192500  | -4.01123300 | -0.09141000 |
| C         | 4.47972900  | -2.48993700 | -1.30389500 | H         | 5.28988100  | -3.49904400 | 0.61200300  |
| H         | 4.05187900  | -3.41118400 | -0.89603000 | C         | 1.83092700  | -0.55528000 | 0.04002500  |
| H         | 4.17889100  | -2.40630500 | -2.35297900 | H         | 2.10889100  | 0.16682600  | 0.82361100  |
| H         | 5.57063600  | -2.54149000 | -1.24433400 | H         | 2.23289600  | -0.15461000 | -0.90474700 |
| C         | 1.75647200  | -0.31941500 | -0.05410000 | C         | 0.34154600  | -0.66764600 | -0.05920700 |
| H         | 2.01595400  | -0.25600300 | 1.01409700  | C         | -0.31047100 | -1.84909900 | 0.02545500  |
| H         | 1.99910200  | 0.65901700  | -0.49458200 | H         | 0.19466700  | -2.79329000 | 0.23100700  |
| C         | 0.31477300  | -0.59358500 | -0.20023600 | C         | -1.77638300 | -1.85305800 | -0.11122100 |
| C         | -0.53153500 | -1.46454800 | -0.61001500 | C         | -2.40946100 | -0.92505700 | -0.97857900 |
| H         | -0.66588500 | -2.41804100 | -1.08985700 | C         | -2.61223500 | -2.70785900 | 0.62731600  |
| C         | -3.14458600 | 1.71427800  | -0.88627500 | C         | -3.80176900 | -0.82151400 | -1.04958700 |
| H         | -3.80422200 | 1.15806400  | -1.54103100 | H         | -1.79905200 | -0.40452400 | -1.73115400 |
| C         | -3.16252800 | 1.72671000  | 0.50569300  | C         | -4.00108800 | -2.62580200 | 0.54718400  |
| H         | -3.83420000 | 1.18250900  | 1.15766500  | H         | -2.16344200 | -3.43861500 | 1.29552700  |
| C         | -2.29029500 | 2.92534200  | -1.32115200 | C         | -4.60760000 | -1.66554000 | -0.28054800 |
| C         | -0.87506100 | 2.50292000  | -0.86644500 | H         | -4.27807300 | -0.11804600 | -1.72576900 |
| C         | -0.88673500 | 2.51700600  | 0.52425400  | H         | -4.60508500 | -3.30539400 | 1.13835400  |
| H         | -0.03028400 | 2.50770300  | 1.18781500  | C         | 0.06563300  | 2.31340200  | 1.05601000  |
| C         | -2.31392300 | 2.94438200  | 0.93944500  | H         | 0.75442800  | 1.92335600  | 1.79833300  |
| H         | -0.00728900 | 2.46996100  | -1.51508500 | C         | 0.35758200  | 2.54311200  | -0.31871700 |
| H         | -2.38853200 | 3.24211800  | -2.36041400 | H         | 1.30848200  | 2.36293100  | -0.80905900 |
| H         | -2.43614200 | 3.27755900  | 1.97089000  | C         | -1.09281800 | 3.27741500  | 1.40752800  |
| C         | -2.64934900 | 3.94453200  | -0.20279200 | C         | -2.26656600 | 2.67805000  | 0.60269400  |
| H         | -2.00458400 | 4.83206200  | -0.20128100 | C         | -1.98728900 | 2.89695800  | -0.72485700 |
| H         | -3.70427400 | 4.24347600  | -0.21756400 | H         | -2.63898600 | 2.73215600  | -1.57480500 |
| Rh        | -1.44829500 | 0.46337600  | -0.14435800 | C         | -0.63304900 | 3.63823200  | -0.77989100 |
| C         | -2.50345100 | -1.36721100 | 0.04885900  | H         | -3.18340800 | 2.29064700  | 1.03129900  |
| C         | -2.56799600 | -1.89618000 | 1.34460000  | H         | -1.27341700 | 3.45206200  | 2.46913500  |
| C         | -3.47568600 | -1.79742800 | -0.87902700 | H         | -0.39573900 | 4.14326000  | -1.71730800 |
| C         | -3.59393800 | -2.76803200 | 1.73746200  | C         | -0.73495400 | 4.49758600  | 0.51265100  |
| H         | -1.80566000 | -1.62991400 | 2.07172600  | H         | -1.53248800 | 5.24936600  | 0.46896700  |
| C         | -4.48734100 | -2.67275700 | -0.50991700 | H         | 0.21454000  | 4.97063100  | 0.79016100  |
| H         | -3.44002300 | -1.43948900 | -1.90507900 | Rh        | -0.94703600 | 0.89539600  | -0.12483800 |
| C         | -4.56001700 | -3.15991700 | 0.80728100  | O         | -5.95753200 | -1.49967600 | -0.42082400 |
| H         | -3.61313900 | -3.14070500 | 2.75597800  | C         | -6.81891300 | -2.35711900 | 0.30832800  |
| H         | -5.24092300 | -2.99659600 | -1.22230700 | H         | -6.68020600 | -2.24547800 | 1.39230100  |
| O         | -5.59668500 | -4.01311700 | 1.06608300  | H         | -7.83473900 | -2.05723500 | 0.04391700  |
| C         | -5.72003300 | -4.53382100 | 2.37780900  | H         | -6.67021200 | -3.41031800 | 0.03399300  |
| H         | -5.86026400 | -3.73512000 | 3.11895500  |           |             |             |             |
| H         | -6.60461100 | -5.17373900 | 2.36617700  | <b>38</b> |             |             |             |
| H         | -4.84356100 | -5.13294700 | 2.66007500  | C         | -5.82645700 | 0.74546100  | -0.06787000 |
| <b>37</b> |             |             |             | C         | -6.56047400 | -0.36938200 | 0.05567900  |
| C         | 4.35694200  | -1.58754600 | -1.14002800 | C         | -6.56285800 | -1.16718100 | 1.30567700  |
| C         | 5.33482200  | -0.71566300 | -1.42378600 | C         | -5.67552100 | -0.68750600 | 2.39215300  |
| C         | 5.98588400  | 0.09532300  | -0.36735500 | C         | -4.94133300 | 0.42657600  | 2.26265800  |
| C         | 5.46160500  | -0.07695600 | 1.00893100  | C         | -4.98511800 | 1.32588000  | 1.04702400  |
| C         | 4.48531500  | -0.95198100 | 1.28778500  | H         | -5.82252200 | 1.31725300  | -0.99485800 |
| C         | 3.86538700  | -1.87389900 | 0.26151700  | H         | -7.18178100 | -0.74812600 | -0.75160400 |
| H         | 3.87307600  | -2.16726900 | -1.92480400 | H         | -5.65002500 | -1.29867900 | 3.29050500  |
| H         | 5.69125300  | -0.55210400 | -2.43736700 | H         | -4.27981200 | 0.76162700  | 3.06028900  |
| H         | 5.91209000  | 0.55305000  | 1.77138300  | O         | -7.24813300 | -2.17785200 | 1.42741700  |
| H         | 4.10035600  | -1.06219100 | 2.30066600  | O         | -3.66237000 | 1.63253100  | 0.58786300  |
|           |             |             |             | C         | -5.56881600 | 2.69546900  | 1.45668200  |



|    |             |             |             |              |             |             |             |
|----|-------------|-------------|-------------|--------------|-------------|-------------|-------------|
| H  | -4.94219700 | 3.14072100  | 2.23599900  | C            | 4.75152400  | 5.10509400  | -0.63777600 |
| H  | -5.56992700 | 3.36609300  | 0.59152500  | H            | 4.81011300  | 4.97160600  | 0.45119800  |
| H  | -6.59052200 | 2.58901000  | 1.83222200  | H            | 5.76054500  | 5.21015100  | -1.04127400 |
| C  | -2.88375000 | 0.51881700  | 0.13125000  | H            | 4.17807900  | 6.01624100  | -0.85582800 |
| H  | -2.84142000 | -0.25143700 | 0.91714700  |              |             |             |             |
| H  | -3.38447600 | 0.05610400  | -0.73307000 | <b>39-ts</b> |             |             |             |
| C  | -1.48944800 | 0.93562000  | -0.24466400 | C            | -5.62978800 | 0.69284200  | 0.37100900  |
| C  | -1.07113300 | 2.21099200  | -0.09948500 | C            | -6.39705700 | -0.40247000 | 0.46389000  |
| H  | -1.76105300 | 2.94173500  | 0.32240400  | C            | -6.39415400 | -1.25518500 | 1.67706600  |
| C  | 0.26934500  | 2.70625000  | -0.42993200 | C            | -5.46383400 | -0.85323800 | 2.75952700  |
| C  | 1.09100200  | 2.08292400  | -1.39524800 | C            | -4.70064000 | 0.24424100  | 2.66278800  |
| C  | 0.80673600  | 3.82778900  | 0.22425800  | C            | -4.74366500 | 1.19633900  | 1.48877500  |
| C  | 2.38931000  | 2.51311300  | -1.64601600 | H            | -5.62741600 | 1.30430700  | -0.53026000 |
| H  | 0.66958600  | 1.29347000  | -2.02708600 | H            | -7.04958100 | -0.72461500 | -0.34328900 |
| C  | 2.10381900  | 4.28238100  | -0.02308400 | H            | -5.43477700 | -1.50552500 | 3.62823800  |
| H  | 0.19965900  | 4.34782900  | 0.96168200  | H            | -4.01355500 | 0.52314800  | 3.46047800  |
| C  | 2.91038000  | 3.61678000  | -0.95609500 | O            | -7.10946600 | -2.24725500 | 1.77296000  |
| H  | 3.00910400  | 2.03121200  | -2.39645200 | O            | -3.42108700 | 1.47665500  | 1.00428000  |
| H  | 2.47322000  | 5.14896100  | 0.51420400  | C            | -5.26724900 | 2.56670200  | 1.96889600  |
| C  | -1.62056100 | -1.76532100 | -1.98445600 | H            | -4.60779200 | 2.95745300  | 2.75027600  |
| H  | -2.60473600 | -1.82379600 | -1.53527400 | H            | -5.26599600 | 3.27329600  | 1.13275700  |
| C  | -1.15775200 | -0.76135600 | -2.86035900 | H            | -6.28310900 | 2.47954400  | 2.36461600  |
| H  | -1.72985900 | 0.09192300  | -3.20825900 | C            | -2.67812400 | 0.34596300  | 0.52243300  |
| C  | -0.78732500 | -3.03240300 | -2.30192000 | H            | -2.40667400 | -0.30150700 | 1.36744700  |
| C  | 0.64183300  | -2.67337700 | -1.85685700 | H            | -3.31684300 | -0.25287800 | -0.14305700 |
| C  | 1.09038700  | -1.71251500 | -2.70303500 | C            | -1.43469400 | 0.77841800  | -0.22389700 |
| H  | 2.06650800  | -1.24060500 | -2.71111500 | C            | -1.38430300 | 2.02503300  | -0.76282600 |
| C  | -0.04273700 | -1.43363400 | -3.71004400 | H            | -2.26410200 | 2.64571600  | -0.58617800 |
| H  | 1.17402600  | -3.12589700 | -1.02968500 | C            | -0.31846800 | 2.72265500  | -1.48409700 |
| H  | -1.18821700 | -3.97341000 | -1.92232000 | C            | 0.73737200  | 2.09582900  | -2.18162300 |
| H  | 0.24409000  | -0.90953000 | -4.62298500 | C            | -0.33889400 | 4.12992000  | -1.49962900 |
| C  | -0.63034600 | -2.86840900 | -3.84265300 | C            | 1.73054400  | 2.83252000  | -2.81224000 |
| H  | 0.06817400  | -3.58902300 | -4.28480000 | H            | 0.75597100  | 1.01130900  | -2.24345400 |
| H  | -1.58640800 | -2.89100300 | -4.37790800 | C            | 0.64893200  | 4.88521700  | -2.12961800 |
| Rh | -0.22764700 | -0.47805000 | -0.91386400 | H            | -1.14567500 | 4.64913400  | -0.98706200 |
| C  | 3.15390800  | -2.50657400 | 2.12095300  | C            | 1.70062100  | 4.23470700  | -2.78763500 |
| C  | 3.83290100  | -3.16688600 | 1.17139000  | H            | 2.53481200  | 2.34315500  | -3.35394700 |
| C  | 5.08884800  | -2.63533100 | 0.59248600  | H            | 0.58927900  | 5.96749700  | -2.10277500 |
| C  | 5.54153200  | -1.31960200 | 1.10575500  | C            | -1.65819500 | -2.28875200 | -1.47893900 |
| C  | 4.86598100  | -0.66689400 | 2.06195700  | H            | -2.59464000 | -2.25166300 | -0.93658900 |
| C  | 3.62251400  | -1.20632300 | 2.73229800  | C            | -1.27217500 | -1.48477600 | -2.55202400 |
| H  | 2.22688500  | -2.90370000 | 2.52763600  | H            | -1.84176300 | -0.68492500 | -3.00906400 |
| H  | 3.49321200  | -4.11999700 | 0.77424500  | C            | -0.72292000 | -3.51758300 | -1.49429200 |
| H  | 6.44509300  | -0.91713600 | 0.65569200  | C            | 0.63783600  | -2.90000200 | -1.10714700 |
| H  | 5.19821000  | 0.30542400  | 2.42233400  | C            | 1.02793400  | -2.10655700 | -2.17559400 |
| O  | 5.71241700  | -3.24189300 | -0.27280400 | H            | 2.01156200  | -1.69160400 | -2.36122800 |
| O  | 2.58255700  | -0.20875300 | 2.72904900  | C            | -0.09292300 | -2.21932700 | -3.23431300 |
| C  | 3.90980200  | -1.42933000 | 4.23178400  | H            | 1.24806800  | -3.22669500 | -0.27346900 |
| H  | 4.21138100  | -0.48296300 | 4.69163900  | H            | -1.04617600 | -4.37907800 | -0.90864300 |
| H  | 3.00119300  | -1.78013700 | 4.73109600  | H            | 0.16247700  | -1.89131100 | -4.24262600 |
| H  | 4.70547300  | -2.16696500 | 4.36989600  | C            | -0.52159600 | -3.69934800 | -3.02597300 |
| C  | 2.07697700  | 0.19072900  | 1.44881000  | H            | 0.26964000  | -4.41631500 | -3.27690300 |
| H  | 1.79988900  | 1.24467300  | 1.55052800  | H            | -1.44760400 | -3.95779200 | -3.55299300 |
| H  | 2.86481400  | 0.13832000  | 0.68750500  | Rh           | -0.15204800 | -0.80892400 | -0.76211500 |
| C  | 0.88845600  | -0.57552600 | 1.01948200  | C            | 4.95298000  | -1.30028200 | 2.33384400  |
| C  | -0.07779700 | -1.36456500 | 1.06234300  | C            | 6.06115400  | -1.68663300 | 1.68628100  |
| H  | -0.75908400 | -2.08108000 | 1.48018700  | C            | 6.88926800  | -0.72669300 | 0.91648600  |
| O  | 4.19226900  | 3.97007100  | -1.27532600 | C            | 6.39616000  | 0.67057600  | 0.86400500  |

|           |             |             |             |           |             |             |             |
|-----------|-------------|-------------|-------------|-----------|-------------|-------------|-------------|
| C         | 5.28557900  | 1.05172400  | 1.51084600  | H         | -4.10694900 | -0.69777400 | -2.35023000 |
| C         | 4.46744800  | 0.13058500  | 2.38717400  | C         | -4.30797500 | -0.53890800 | -0.15371200 |
| H         | 4.34646700  | -2.01510200 | 2.88833000  | H         | -4.31479300 | -1.56114100 | 0.20345000  |
| H         | 6.40518400  | -2.71750900 | 1.68774000  | C         | -4.43285000 | 1.42637100  | -1.42526000 |
| H         | 6.98358400  | 1.36066500  | 0.26431300  | C         | -3.16889700 | 1.93978300  | -0.69762500 |
| H         | 4.92509400  | 2.07783200  | 1.45396300  | C         | -3.28388800 | 1.48115000  | 0.64585400  |
| O         | 7.91622700  | -1.07372800 | 0.34224500  | H         | -2.81621700 | 1.92447400  | 1.51815100  |
| O         | 3.07008100  | 0.20722000  | 2.05253500  | C         | -4.61672500 | 0.70139300  | 0.71200100  |
| C         | 4.52619100  | 0.63251400  | 3.84527700  | H         | -2.60883100 | 2.80556400  | -1.03292100 |
| H         | 4.13676300  | 1.65411900  | 3.89646100  | H         | -4.66458800 | 1.89609100  | -2.38201100 |
| H         | 3.90145300  | -0.00598400 | 4.47785200  | H         | -5.01539700 | 0.50687100  | 1.70824600  |
| H         | 5.55325100  | 0.61835900  | 4.22102200  | C         | -5.48288300 | 1.52547500  | -0.28246700 |
| C         | 2.73224600  | -0.17581300 | 0.71394800  | H         | -5.65975000 | 2.55490600  | 0.05072900  |
| H         | 3.27936700  | 0.44755600  | -0.00990200 | H         | -6.43515200 | 1.04041200  | -0.52854500 |
| H         | 3.02989600  | -1.21785000 | 0.52444100  | Rh        | -2.08962600 | 0.14280800  | -0.46472400 |
| C         | 1.28236400  | -0.01306500 | 0.50489400  | C         | 1.63225700  | 4.62219000  | -0.72382800 |
| C         | 0.19307400  | 0.43882000  | 0.99564600  | C         | 1.02729500  | 5.77589000  | -1.04035000 |
| H         | -0.30068900 | 0.86740800  | 1.85191100  | C         | 0.25683700  | 6.55195000  | -0.03937300 |
| O         | 2.71993100  | 4.86581700  | -3.44235300 | C         | 0.15474200  | 5.95694200  | 1.31504400  |
| C         | 2.71910100  | 6.28273200  | -3.47543200 | C         | 0.76269600  | 4.80369900  | 1.62693500  |
| H         | 2.78545600  | 6.71194400  | -2.46644800 | C         | 1.64214900  | 4.03215500  | 0.66870300  |
| H         | 3.60342000  | 6.57072300  | -4.04727000 | H         | 2.18216500  | 4.05044200  | -1.46987500 |
| H         | 1.82222900  | 6.67556000  | -3.97317400 | H         | 1.06227500  | 6.19395700  | -2.04293000 |
| <b>40</b> |             |             |             | H         | -0.44741900 | 6.50829700  | 2.03238300  |
| C         | -0.43379400 | -4.15551900 | 0.91367500  | H         | 0.67124900  | 4.37065100  | 2.62213000  |
| C         | -1.14165600 | -4.18765400 | 2.05214200  | O         | -0.28151700 | 7.61834700  | -0.32022100 |
| C         | -2.62281900 | -4.24421800 | 2.05494300  | O         | 1.28076300  | 2.64495900  | 0.63605400  |
| C         | -3.28169500 | -4.20689000 | 0.72648500  | C         | 3.09041400  | 4.03026700  | 1.20423300  |
| C         | -2.57248400 | -4.16678000 | -0.41040900 | H         | 3.11132500  | 3.57650200  | 2.20016300  |
| C         | -1.06311500 | -4.23118000 | -0.45770800 | H         | 3.72374600  | 3.43253400  | 0.54104100  |
| H         | 0.65186300  | -4.10068500 | 0.93064100  | H         | 3.48753700  | 5.04766000  | 1.26316300  |
| H         | -0.66398900 | -4.16854100 | 3.02783500  | C         | -0.05464500 | 2.34792100  | 0.20615300  |
| H         | -4.36872800 | -4.20735700 | 0.73319400  | H         | -0.76313400 | 2.66885900  | 0.98395300  |
| H         | -3.06232400 | -4.12490200 | -1.38178800 | H         | -0.29086100 | 2.93948300  | -0.69298000 |
| O         | -3.26988500 | -4.30173300 | 3.09494900  | C         | -0.23689700 | 0.88424600  | -0.10049200 |
| O         | -0.55759000 | -3.20965900 | -1.34861500 | C         | 0.86402000  | 0.08955000  | -0.19848200 |
| C         | -0.64113300 | -5.55024500 | -1.13930400 | H         | 1.83966200  | 0.54352100  | -0.05152300 |
| H         | -1.03965400 | -5.58027900 | -2.15835800 | O         | 7.41673000  | -1.20030500 | 0.43897900  |
| H         | 0.45051000  | -5.60701900 | -1.19362600 | C         | 8.43965500  | -1.82169300 | -0.32075100 |
| H         | -1.01722500 | -6.41174400 | -0.58054200 | H         | 8.39323000  | -1.52830400 | -1.37813600 |
| C         | -0.52125000 | -1.86947200 | -0.88555500 | H         | 9.38301400  | -1.47729200 | 0.10729400  |
| H         | -0.96055300 | -1.25959100 | -1.71121300 | H         | 8.38824200  | -2.91652500 | -0.24956300 |
| H         | -1.15044700 | -1.77155000 | 0.03064400  | <b>41</b> |             |             |             |
| C         | 0.85816200  | -1.31510600 | -0.57089400 | C         | -3.71496400 | -1.78542200 | 0.26492100  |
| C         | 1.94776100  | -2.11281000 | -0.72226600 | C         | -4.21769600 | -0.72046000 | -0.37568600 |
| H         | 1.76161300  | -3.08750600 | -1.16809200 | C         | -3.46206900 | -0.02620900 | -1.44429200 |
| C         | 3.35686600  | -1.84570100 | -0.41421300 | C         | -2.04802400 | -0.44150600 | -1.63433800 |
| C         | 3.79639600  | -1.01976300 | 0.64441000  | C         | -1.51239100 | -1.51978800 | -0.93479600 |
| C         | 4.34953000  | -2.49273600 | -1.17098000 | C         | -2.38127700 | -2.42024000 | -0.06649100 |
| C         | 5.14655800  | -0.82735800 | 0.89862400  | H         | -4.28301600 | -2.29727900 | 1.04013400  |
| H         | 3.06831300  | -0.54764800 | 1.29492800  | H         | -5.20929900 | -0.32917400 | -0.16292400 |
| C         | 5.71080600  | -2.30422400 | -0.93212900 | H         | -1.56437700 | -0.05372200 | -2.52790600 |
| H         | 4.04722000  | -3.15333200 | -1.98053600 | H         | -0.59077700 | -1.97835200 | -1.28137400 |
| C         | 6.11822200  | -1.45937300 | 0.10750300  | O         | -3.97926200 | 0.85320700  | -2.13168200 |
| H         | 5.47761700  | -0.19896100 | 1.71984400  | O         | -1.72588800 | -2.86459800 | 1.12012000  |
| H         | 6.43599200  | -2.81794800 | -1.55317500 | C         | -2.65060800 | -3.72715700 | -0.84998700 |
| C         | -4.19572600 | -0.09958000 | -1.45063100 | H         | -1.69903700 | -4.22438500 | -1.06315900 |

|              |             |             |             |           |             |             |             |
|--------------|-------------|-------------|-------------|-----------|-------------|-------------|-------------|
| H            | -3.26028600 | -4.40065400 | -0.23932100 | H         | -1.10117300 | 1.36532500  | -2.39665900 |
| H            | -3.17302800 | -3.52258800 | -1.78893200 | H         | 0.47284100  | 1.79454100  | -3.11612800 |
| C            | -1.15892000 | -1.83183500 | 1.94524700  | C         | 0.62258100  | 0.83182800  | -1.16873000 |
| H            | -1.96300100 | -1.18138700 | 2.32259700  | C         | 1.95519600  | 0.60687700  | -1.35115700 |
| H            | -0.73489200 | -2.38170600 | 2.79481700  | H         | 2.37979600  | 0.95570800  | -2.29754700 |
| C            | -0.09839000 | -1.05812200 | 1.19830600  | C         | 2.94912100  | 0.03613300  | -0.44952900 |
| C            | 1.18774000  | -1.43593300 | 1.36309700  | C         | 4.31317100  | 0.18119300  | -0.76901600 |
| H            | 1.37885700  | -2.18982400 | 2.13553200  | C         | 2.64330600  | -0.63470100 | 0.75759700  |
| C            | 2.40953100  | -1.03210100 | 0.65088700  | C         | 5.32699600  | -0.28858800 | 0.06286200  |
| C            | 3.66180200  | -1.35578500 | 1.19998100  | H         | 4.58673400  | 0.68868800  | -1.69136200 |
| C            | 2.41609700  | -0.36688300 | -0.59474000 | C         | 3.64061700  | -1.10200100 | 1.59906000  |
| C            | 4.86308500  | -1.02312600 | 0.57159700  | H         | 1.60034600  | -0.81171200 | 1.01539300  |
| H            | 3.69882600  | -1.88267500 | 2.15115200  | C         | 4.99374000  | -0.93288300 | 1.26211900  |
| C            | 3.60000700  | -0.02949000 | -1.23478700 | H         | 6.36187500  | -0.14839900 | -0.22807900 |
| H            | 1.46632700  | -0.11445200 | -1.06046400 | H         | 3.39961900  | -1.61999200 | 2.52250200  |
| C            | 4.83769100  | -0.35124000 | -0.65600300 | C         | -1.24532400 | -1.88759700 | -1.69392900 |
| H            | 5.80172600  | -1.29326900 | 1.04250000  | H         | -1.26149800 | -1.38816100 | -2.65570100 |
| H            | 3.59540700  | 0.47684500  | -2.19575400 | C         | -0.14013700 | -2.42431500 | -1.04623500 |
| C            | -0.67294500 | 1.85368600  | 1.73558900  | H         | 0.88612900  | -2.42614900 | -1.39334500 |
| H            | -0.80897900 | 1.35327800  | 2.68678000  | C         | -2.49127100 | -2.44621600 | -0.97070000 |
| C            | 0.50362100  | 1.90022600  | 0.98091700  | C         | -2.41337700 | -1.74842000 | 0.40743900  |
| H            | 1.45116500  | 1.44134600  | 1.22778500  | C         | -1.30635100 | -2.29107200 | 1.05855500  |
| C            | -1.56475500 | 3.00354500  | 1.21775800  | H         | -1.09216900 | -2.23558300 | 2.11969600  |
| C            | -1.93739000 | 2.53067600  | -0.20270400 | C         | -0.69176000 | -3.32408000 | 0.08431400  |
| C            | -0.78052800 | 2.57283800  | -0.94870300 | H         | -3.21075700 | -1.17523900 | 0.86570500  |
| H            | -0.69040200 | 2.46906900  | -2.02327700 | H         | -3.43956000 | -2.36215600 | -1.50315900 |
| C            | 0.33577700  | 3.07476400  | -0.00661400 | H         | 0.00690000  | -4.04278900 | 0.51466500  |
| H            | -2.94343100 | 2.37955700  | -0.57117600 | C         | -1.98158900 | -3.86723200 | -0.59475700 |
| H            | -2.39500000 | 3.29921500  | 1.85994500  | H         | -2.64619500 | -4.39131600 | 0.10253800  |
| H            | 1.24714500  | 3.43528800  | -0.48425500 | H         | -1.77690400 | -4.49797400 | -1.46839600 |
| C            | -0.47879800 | 4.06413400  | 0.87626600  | Rh        | -0.65141100 | -0.49650500 | -0.03562000 |
| H            | -0.87489300 | 4.91887700  | 0.31470100  | O         | 5.89487800  | -1.43697800 | 2.15094200  |
| H            | 0.07661700  | 4.41286000  | 1.75509700  | C         | 7.27675600  | -1.30981600 | 1.85540000  |
| Rh           | -0.87217700 | 0.47012900  | 0.04158700  | H         | 7.57851300  | -0.25657800 | 1.78215400  |
| O            | 5.94395000  | 0.02402500  | -1.36533500 | H         | 7.80523600  | -1.77892600 | 2.68724000  |
| C            | 7.21830000  | -0.29126800 | -0.83209900 | H         | 7.53891200  | -1.82540900 | 0.92199200  |
| H            | 7.94766800  | 0.09249800  | -1.54821400 |           |             |             |             |
| H            | 7.38029200  | 0.18968500  | 0.14218100  | <b>43</b> |             |             |             |
| H            | 7.35455000  | -1.37574000 | -0.72269400 | C         | 3.51354100  | -2.25838900 | 0.27492100  |
| <b>42-ts</b> |             |             |             | C         | 3.61347500  | -1.25579700 | 1.15540600  |
| C            | -2.06264700 | 2.96681200  | -0.22519500 | C         | 2.42924100  | -0.60857300 | 1.78320500  |
| C            | -2.79596800 | 2.22594900  | 0.61482600  | C         | 1.11617400  | -0.87080000 | 1.18619100  |
| C            | -2.16829700 | 1.31758100  | 1.60880200  | C         | 0.94779900  | -2.01573900 | 0.17548400  |
| C            | -0.72824600 | 1.05752700  | 1.44173100  | C         | 2.21286500  | -2.84827500 | -0.22117000 |
| C            | 0.07553100  | 1.77133900  | 0.46961100  | H         | 4.40654800  | -2.72951200 | -0.13537900 |
| C            | -0.54834900 | 2.98369700  | -0.25694300 | H         | 4.58056300  | -0.89933500 | 1.50385200  |
| H            | -2.53084500 | 3.64923100  | -0.93303900 | H         | 0.15958800  | -2.71769600 | 0.47179500  |
| H            | -3.88135100 | 2.28644300  | 0.64114400  | O         | 2.59583500  | 0.13866200  | 2.75622900  |
| H            | -0.23367600 | 0.67070700  | 2.33189200  | O         | 2.23159600  | -2.82232800 | -1.66968200 |
| H            | 1.10186900  | 1.94284300  | 0.78605600  | C         | 2.11217600  | -4.31960900 | 0.18309400  |
| O            | -2.83983200 | 0.81173500  | 2.51144300  | H         | 1.21149000  | -4.76476900 | -0.25347000 |
| O            | -0.11620900 | 3.03283000  | -1.62286000 | H         | 2.98218400  | -4.87875200 | -0.17772400 |
| C            | -0.03645200 | 4.28355700  | 0.38623800  | H         | 2.06672600  | -4.41579900 | 1.27303500  |
| H            | 1.05351800  | 4.33497800  | 0.29448600  | C         | 1.75206900  | -1.54491900 | -2.07578800 |
| H            | -0.46628000 | 5.14802200  | -0.13021600 | H         | 2.54512700  | -0.78661800 | -1.99541700 |
| H            | -0.31498900 | 4.33160400  | 1.44333200  | H         | 1.43687900  | -1.61742300 | -3.12125400 |
| C            | -0.08110700 | 1.71296600  | -2.17427200 | C         | 0.59745500  | -1.28779200 | -1.12121200 |
|              |             |             |             | C         | -0.57623800 | -0.65926800 | -1.48769900 |

|           |             |             |             |           |             |             |             |
|-----------|-------------|-------------|-------------|-----------|-------------|-------------|-------------|
| H         | -0.57926300 | -0.25960900 | -2.50223600 | C         | -2.71843800 | 0.39323500  | -0.39866800 |
| C         | -1.92478000 | -0.65030100 | -0.88172000 | C         | -4.82185900 | -0.37484800 | 1.25214600  |
| C         | -2.96691400 | -0.06812200 | -1.63963300 | H         | -3.56326900 | 0.20642800  | 2.87674000  |
| C         | -2.27709700 | -1.18470600 | 0.37071900  | C         | -3.89498000 | -0.10321600 | -0.96328200 |
| C         | -4.27419400 | -0.02244500 | -1.18249600 | H         | -1.91235500 | 0.66295000  | -1.06803500 |
| H         | -2.73758600 | 0.34577100  | -2.61910200 | C         | -4.95892500 | -0.48952000 | -0.13972700 |
| C         | -3.58983300 | -1.14871400 | 0.84315300  | H         | -5.65025800 | -0.68151300 | 1.88321400  |
| H         | -1.52621700 | -1.63500100 | 1.00619000  | H         | -3.96400900 | -0.18960400 | -2.04181100 |
| C         | -4.60058800 | -0.56499700 | 0.06996600  | C         | 2.17284400  | -3.05770700 | -0.74997100 |
| H         | -5.06457000 | 0.42245200  | -1.77895700 | H         | 2.29579000  | -3.36645100 | -1.78215700 |
| H         | -3.80800200 | -1.57525400 | 1.81556600  | C         | 3.13681900  | -2.46767500 | 0.07136000  |
| C         | 0.88943100  | 2.44292600  | 1.28995300  | H         | 4.15973800  | -2.22423900 | -0.19333400 |
| H         | 0.78673100  | 2.13456200  | 2.32313700  | C         | 1.03290000  | -3.52644900 | 0.18435600  |
| C         | 2.04382400  | 2.31191300  | 0.50911100  | C         | 0.44339500  | -2.16776600 | 0.63124300  |
| H         | 2.98551900  | 1.89097600  | 0.83851000  | C         | 1.41694600  | -1.57531000 | 1.45376300  |
| C         | -0.00461500 | 3.46848500  | 0.55057500  | H         | 1.25572700  | -0.77180400 | 2.16235900  |
| C         | -0.40992600 | 2.70001300  | -0.73038800 | C         | 2.59783600  | -2.57050900 | 1.51609500  |
| C         | 0.74086500  | 2.56879100  | -1.49358200 | H         | -0.60828500 | -1.90891200 | 0.58622000  |
| H         | 0.81151000  | 2.27193000  | -2.53348600 | H         | 0.33105100  | -4.25158000 | -0.22945600 |
| C         | 1.87171200  | 3.25817500  | -0.69785900 | H         | 3.32188900  | -2.42112000 | 2.31809000  |
| H         | -1.43209500 | 2.51240400  | -1.03800400 | C         | 1.84199900  | -3.92626500 | 1.44907600  |
| H         | -0.82049300 | 3.90620900  | 1.12703100  | H         | 1.20759500  | -4.10744100 | 2.32515600  |
| H         | 2.77693000  | 3.50285200  | -1.25524900 | H         | 2.50695700  | -4.78239600 | 1.28135900  |
| C         | 1.07980000  | 4.41964200  | -0.03168100 | Rh        | 1.72352700  | -0.92246200 | -0.57668000 |
| H         | 0.68070000  | 5.14052800  | -0.75573400 | H         | 0.07927200  | 0.49401000  | -1.69455200 |
| H         | 1.65317000  | 4.94077100  | 0.74438900  | O         | -6.14795400 | -0.98827600 | -0.58356300 |
| Rh        | 0.58850900  | 0.79266700  | -0.09314500 | C         | -6.34024300 | -1.12092300 | -1.98260400 |
| H         | 0.32597600  | -0.80590700 | 1.93920200  | H         | -5.61123100 | -1.81163000 | -2.42698100 |
| O         | -5.90993600 | -0.47643500 | 0.43500900  | H         | -7.34533100 | -1.52717200 | -2.10998200 |
| C         | -6.29753800 | -1.01544200 | 1.68950600  | H         | -6.27388400 | -0.15087600 | -2.49295100 |
| H         | -7.37156300 | -0.83955200 | 1.77157400  |           |             |             |             |
| H         | -6.10159200 | -2.09446900 | 1.74234800  | <b>45</b> |             |             |             |
| H         | -5.78333900 | -0.51430100 | 2.52014100  | C         | 0.76220400  | 2.57782100  | 1.70105100  |
| <b>44</b> |             |             |             | C         | -0.09439100 | 1.60407800  | 2.03850800  |
| C         | 2.42387700  | 3.32773800  | -0.42189900 | C         | -0.02278400 | 0.25708400  | 1.42661900  |
| C         | 2.92603700  | 2.30943500  | -1.13032000 | C         | 1.12727900  | -0.11310700 | 0.80289100  |
| C         | 2.07803300  | 1.17509400  | -1.52449700 | C         | 2.29709700  | 0.83650000  | 0.62317800  |
| C         | 0.74961700  | 1.06688200  | -1.05136600 | C         | 1.83558500  | 2.31693200  | 0.67594400  |
| C         | 0.09848600  | 2.15453000  | -0.19972700 | H         | 0.68990300  | 3.57777800  | 2.12331600  |
| C         | 0.99869000  | 3.42223600  | 0.07870000  | H         | -0.90467900 | 1.77139300  | 2.74478100  |
| H         | 3.05678400  | 4.16440600  | -0.13119900 | H         | 3.10300100  | 0.65453900  | 1.34886200  |
| H         | 3.96616700  | 2.27574900  | -1.44338300 | O         | -1.11009300 | -0.50158400 | 1.51792800  |
| H         | -0.80229200 | 2.49702300  | -0.72385300 | O         | 1.22123700  | 2.49450600  | -0.65584500 |
| O         | 2.58087800  | 0.17433700  | -2.18151100 | C         | 3.00194800  | 3.29698600  | 0.82648900  |
| O         | 1.07503100  | 3.55159200  | 1.52162500  | H         | 3.79516500  | 3.09397600  | 0.09973300  |
| C         | 0.34645900  | 4.70927700  | -0.43274200 | H         | 2.64850000  | 4.32327800  | 0.67913400  |
| H         | -0.66340100 | 4.80254400  | -0.01856200 | H         | 3.43560300  | 3.22261500  | 1.83005000  |
| H         | 0.92826100  | 5.58260100  | -0.11838900 | C         | 1.99033000  | 1.73817500  | -1.60737400 |
| H         | 0.28540000  | 4.70773500  | -1.52673900 | H         | 1.27603000  | 1.24244900  | -2.27725800 |
| C         | 0.77954000  | 2.28545300  | 2.10430300  | H         | 2.61744900  | 2.40800600  | -2.21281900 |
| H         | 1.68480700  | 1.65310100  | 2.12969500  | C         | 2.81874100  | 0.75633500  | -0.79831000 |
| H         | 0.44508600  | 2.45468300  | 3.13229300  | C         | 3.84243000  | 0.05171800  | -1.30887100 |
| C         | -0.28361700 | 1.70736500  | 1.20584300  | H         | 4.07759200  | 0.23057300  | -2.36043100 |
| C         | -1.37347500 | 1.06941900  | 1.66933800  | C         | 4.73505800  | -0.91920200 | -0.65963200 |
| H         | -1.41541600 | 0.94608100  | 2.75303300  | C         | 5.99255200  | -1.17553000 | -1.24759100 |
| C         | -2.56011600 | 0.53064400  | 0.99137700  | C         | 4.41872700  | -1.63709700 | 0.50633300  |
| C         | -3.64801500 | 0.12171700  | 1.79577400  | C         | 6.89466000  | -2.06901000 | -0.69064000 |
|           |             |             |             | H         | 6.26501700  | -0.65065500 | -2.16055700 |

|              |             |             |             |           |             |             |             |
|--------------|-------------|-------------|-------------|-----------|-------------|-------------|-------------|
| C            | 5.31598900  | -2.54076000 | 1.07882700  | C         | -3.69620300 | -1.75684300 | -0.88845600 |
| H            | 3.44573500  | -1.51988500 | 0.97006000  | C         | -6.08052900 | -2.94114200 | -0.08063500 |
| C            | 6.56522800  | -2.75848600 | 0.48610600  | H         | -5.96808100 | -1.65626100 | 1.62361500  |
| H            | 7.86173400  | -2.25394500 | -1.14810000 | C         | -4.27886100 | -2.74767300 | -1.68146800 |
| H            | 5.02258900  | -3.07482000 | 1.97563500  | H         | -2.74830700 | -1.33959300 | -1.20681900 |
| C            | -3.44871100 | -2.11072800 | 0.37749200  | C         | -5.48169400 | -3.34313500 | -1.28417400 |
| H            | -2.74302700 | -2.86378300 | 0.71025800  | H         | -7.00759400 | -3.41765200 | 0.22284900  |
| C            | -4.08656500 | -1.14344800 | 1.18382500  | H         | -3.78029700 | -3.05286000 | -2.59461500 |
| H            | -3.96913100 | -1.01723100 | 2.25424200  | C         | 3.97121600  | -0.87065700 | -1.37537700 |
| C            | -4.24433600 | -2.16073300 | -0.94722100 | H         | 3.56625600  | -1.05873600 | -2.36334600 |
| C            | -3.85971900 | -0.78447500 | -1.54096600 | C         | 4.41294600  | 0.36123000  | -0.86612300 |
| C            | -4.49707900 | 0.17919300  | -0.73653500 | H         | 4.40980400  | 1.31552300  | -1.38089000 |
| H            | -4.69507600 | 1.21557100  | -0.98761200 | C         | 4.53766200  | -1.95550300 | -0.43052500 |
| C            | -5.27136300 | -0.60646300 | 0.34860300  | C         | 3.68283900  | -1.68207000 | 0.82978100  |
| H            | -3.45349600 | -0.64214800 | -2.53669600 | C         | 4.12450200  | -0.44176500 | 1.34187400  |
| H            | -4.08196700 | -3.03145000 | -1.58354400 | H         | 3.96375800  | -0.05794400 | 2.34380400  |
| H            | -6.04546000 | -0.06071000 | 0.88950600  | C         | 5.24957800  | 0.03584800  | 0.39290500  |
| C            | -5.68383200 | -1.87776200 | -0.44076000 | H         | 3.12353000  | -2.44296600 | 1.36329300  |
| H            | -6.39015200 | -1.66714300 | -1.25305900 | H         | 4.54205800  | -2.97943000 | -0.80586300 |
| H            | -6.07700600 | -2.67426900 | 0.20301900  | H         | 5.90252500  | 0.82573600  | 0.76564600  |
| Rh           | -2.53627100 | -0.22487400 | 0.06460800  | C         | 5.89073200  | -1.31648900 | -0.01757400 |
| H            | 1.19370600  | -1.10377800 | 0.36120300  | H         | 6.37183200  | -1.83535300 | 0.82064600  |
| O            | -1.34778800 | 1.35862500  | -1.00222600 | H         | 6.59310300  | -1.22167700 | -0.85465500 |
| C            | -1.92674100 | 2.56010200  | -1.51501500 | Rh        | 2.50610300  | -0.11601000 | 0.00008800  |
| H            | -1.21171300 | 3.06933600  | -2.16938000 | O         | 0.85995100  | -0.02832600 | 1.30844900  |
| H            | -2.80886900 | 2.28095600  | -2.09441500 | H         | -0.08845300 | 0.32939900  | 0.58492700  |
| H            | -2.22247000 | 3.23933400  | -0.70610100 | C         | 0.52045000  | -1.03382200 | 2.23941500  |
| H            | -0.45687300 | 1.58593800  | -0.64420600 | H         | -0.26535900 | -0.67117500 | 2.91677400  |
| O            | 7.51484000  | -3.61701800 | 0.96020100  | H         | 0.15787300  | -1.95198600 | 1.75076400  |
| C            | 7.23098600  | -4.34148600 | 2.14544400  | H         | 1.39461700  | -1.29197900 | 2.85116900  |
| H            | 6.35864900  | -4.99678900 | 2.02014100  | H         | -0.80778900 | -0.45308400 | -0.87630900 |
| H            | 8.11427000  | -4.95192700 | 2.34298500  | O         | -6.13745300 | -4.31771900 | -1.97915200 |
| H            | 7.05616700  | -3.67073200 | 2.99733200  | C         | -5.57673200 | -4.76201500 | -3.20316700 |
| <b>46-ts</b> |             |             |             | H         | -4.58442700 | -5.20892400 | -3.05514100 |
| C            | -1.13932400 | 3.43757100  | -0.87962000 | H         | -6.25955800 | -5.52191600 | -3.58794000 |
| C            | -0.02822100 | 2.83189100  | -1.31947300 | H         | -5.49693200 | -3.94417100 | -3.93181800 |
| C            | 0.18232600  | 1.38341500  | -1.16164600 | <b>47</b> |             |             |             |
| C            | -0.82932100 | 0.59073800  | -0.55009600 | C         | 1.98482700  | -3.39927600 | -1.23036600 |
| C            | -2.24044700 | 1.16398500  | -0.38077200 | C         | 0.67493200  | -3.13971300 | -1.36768400 |
| C            | -2.27988700 | 2.70946300  | -0.20954900 | C         | 0.06808500  | -1.92687900 | -0.80735900 |
| H            | -1.24265100 | 4.51867600  | -0.96038200 | C         | 0.93300300  | -1.06756100 | 0.07891700  |
| H            | 0.78945100  | 3.38825100  | -1.77032500 | C         | 2.41956400  | -1.02662600 | -0.34586500 |
| H            | -2.86447500 | 0.88061000  | -1.23769800 | C         | 2.99083800  | -2.43852900 | -0.64032000 |
| O            | 1.33384800  | 0.91791800  | -1.47765100 | H         | 2.38767600  | -4.34696800 | -1.58468700 |
| O            | -2.13844600 | 2.94488200  | 1.21597100  | H         | -0.00278400 | -3.83847400 | -1.85048900 |
| C            | -3.62498100 | 3.29012100  | -0.66976000 | H         | 2.53272600  | -0.38195900 | -1.22370900 |
| H            | -4.45452300 | 2.74018400  | -0.21239600 | O         | -1.12914400 | -1.69312900 | -1.01940100 |
| H            | -3.69922000 | 4.34016800  | -0.36710800 | O         | 3.37461500  | -2.95839100 | 0.65134300  |
| H            | -3.73124900 | 3.23258600  | -1.75974500 | C         | 4.22447900  | -2.36951500 | -1.55574000 |
| C            | -2.46541000 | 1.75873600  | 1.94517800  | H         | 4.94472100  | -1.64115400 | -1.16914100 |
| H            | -1.57213500 | 1.44258800  | 2.50507700  | H         | 4.71146000  | -3.34938600 | -1.59626400 |
| H            | -3.26167600 | 1.97274200  | 2.67093300  | H         | 3.94855800  | -2.07314000 | -2.57477000 |
| C            | -2.88610800 | 0.72848100  | 0.92040200  | C         | 3.66117100  | -1.87083900 | 1.54121800  |
| C            | -3.74551600 | -0.27132200 | 1.18324200  | H         | 3.04435500  | -2.00378200 | 2.44185000  |
| H            | -4.14331200 | -0.30499700 | 2.19949500  | H         | 4.71491900  | -1.89880100 | 1.85082300  |
| C            | -4.28765800 | -1.32158200 | 0.30895200  | C         | 3.32284600  | -0.59805800 | 0.78826000  |
| C            | -5.48855700 | -1.95639400 | 0.69470100  | C         | 3.86340100  | 0.59819000  | 1.07660500  |

|              |             |             |             |           |             |             |             |
|--------------|-------------|-------------|-------------|-----------|-------------|-------------|-------------|
| H            | 4.58132000  | 0.61048000  | 1.89911800  | H         | -2.16786300 | 1.45117700  | 2.57004900  |
| C            | 3.68496100  | 1.90767200  | 0.43472100  | H         | -3.73194600 | 0.77987900  | 2.05543000  |
| C            | 4.69422100  | 2.87960200  | 0.60985200  | C         | -1.93979000 | -0.13045500 | 1.12246100  |
| C            | 2.57360200  | 2.27750200  | -0.34010000 | C         | -0.61585200 | 0.25022000  | 0.90793500  |
| C            | 4.61658400  | 4.13146900  | 0.02049500  | H         | -0.33385100 | 1.04342200  | 1.60951000  |
| H            | 5.56218100  | 2.63500700  | 1.21775200  | C         | -2.61981100 | -1.21784000 | 0.42705800  |
| C            | 2.47855200  | 3.53455300  | -0.93975200 | C         | -1.87112700 | -2.23831500 | -0.21078100 |
| H            | 1.74296400  | 1.59195200  | -0.45991000 | C         | -4.02481700 | -1.32421500 | 0.36157500  |
| C            | 3.50598000  | 4.47010600  | -0.76820000 | C         | -2.48613700 | -3.29033600 | -0.86631700 |
| H            | 5.40120400  | 4.86914600  | 0.15688100  | H         | -0.78815400 | -2.18124400 | -0.17834500 |
| H            | 1.59612200  | 3.77504800  | -1.52179400 | C         | -4.65617500 | -2.38099100 | -0.28961200 |
| C            | -2.95304400 | 1.12497800  | -1.37548300 | H         | -4.65026200 | -0.55768900 | 0.80570300  |
| H            | -2.16030200 | 1.31139800  | -2.09185500 | C         | -3.88802500 | -3.37748700 | -0.90825100 |
| C            | -3.92428500 | 0.11215200  | -1.43629100 | H         | -1.90520200 | -4.06949000 | -1.35047000 |
| H            | -4.02554700 | -0.65146800 | -2.19967300 | H         | -5.73938400 | -2.41487700 | -0.31576700 |
| C            | -3.48683000 | 2.17671100  | -0.37452300 | C         | 2.35482900  | -1.22717800 | 1.48920800  |
| C            | -3.35542100 | 1.38117900  | 0.94498400  | H         | 2.01099200  | -1.06255900 | 2.50423000  |
| C            | -4.33123200 | 0.36090700  | 0.87999000  | C         | 1.86893300  | -2.18012300 | 0.58706800  |
| H            | -4.71990100 | -0.21746500 | 1.71133200  | H         | 1.08774500  | -2.90709800 | 0.77874800  |
| C            | -5.05503100 | 0.54230400  | -0.47331400 | C         | 3.74480900  | -0.79798600 | 0.95922300  |
| H            | -2.86325400 | 1.74867500  | 1.83886100  | C         | 3.38422200  | -0.02978900 | -0.33436400 |
| H            | -3.01707600 | 3.16130600  | -0.39965300 | C         | 2.90574400  | -0.97386300 | -1.22735600 |
| H            | -6.01490800 | 0.03626700  | -0.58568000 | H         | 2.74197200  | -0.84655200 | -2.29109700 |
| C            | -5.01553100 | 2.08631500  | -0.62960300 | C         | 2.95850200  | -2.33694300 | -0.50130000 |
| H            | -5.60957500 | 2.61050100  | 0.12960200  | H         | 3.63888300  | 1.00281800  | -0.54577900 |
| H            | -5.30414400 | 2.42407300  | -1.63243900 | H         | 4.39275400  | -0.27768000 | 1.66582800  |
| Rh           | -2.48872500 | -0.37521800 | 0.12125500  | H         | 2.89002400  | -3.22581800 | -1.13046400 |
| O            | -1.64404300 | -1.27331000 | 1.68865700  | C         | 4.24165500  | -2.14328400 | 0.35704700  |
| C            | -1.86677900 | -0.90142400 | 3.01156400  | H         | 5.15119500  | -2.03352200 | -0.24596100 |
| H            | -1.68620300 | -1.76080700 | 3.68092300  | H         | 4.37963900  | -2.92905500 | 1.10984500  |
| H            | -1.19367500 | -0.08706700 | 3.34715500  | Rh        | 1.17539100  | -0.17493800 | -0.01673100 |
| H            | -2.90024800 | -0.56167300 | 3.21460300  | O         | -4.39692600 | -4.45458000 | -1.56429500 |
| H            | 0.49736400  | -0.06648400 | 0.13613300  | C         | -5.80748000 | -4.60241000 | -1.63178800 |
| H            | 0.81294600  | -1.48747800 | 1.08542600  | H         | -6.27502200 | -3.76401100 | -2.16433000 |
| O            | 3.51650100  | 5.72269500  | -1.30545300 | H         | -5.98481800 | -5.52568400 | -2.18595900 |
| C            | 2.41563500  | 6.11976400  | -2.10751500 | H         | -6.25110300 | -4.68779400 | -0.63128600 |
| H            | 1.47810500  | 6.11816200  | -1.53585600 |           |             |             |             |
| H            | 2.63569300  | 7.13723800  | -2.43563200 | <b>49</b> |             |             |             |
| H            | 2.30256400  | 5.47149200  | -2.98664300 | C         | -0.87970100 | 3.37711100  | 0.68752700  |
| <b>48-ts</b> |             |             |             | C         | 0.43271000  | 3.51430700  | 0.44085200  |
| C            | -0.85204800 | 3.36072500  | 0.71146700  | C         | 1.14566600  | 2.73509200  | -0.62159700 |
| C            | 0.45358400  | 3.50123600  | 0.43156100  | C         | 0.45420300  | 1.54692700  | -1.14416500 |
| C            | 1.13491000  | 2.72764700  | -0.65211000 | C         | -0.88474800 | 1.21938100  | -0.61181400 |
| C            | 0.40924300  | 1.55962100  | -1.17498100 | C         | -1.75949100 | 2.41555000  | -0.08880400 |
| C            | -0.90719500 | 1.26060700  | -0.65805300 | H         | -1.38941000 | 4.01790300  | 1.40634000  |
| C            | -1.75146800 | 2.42024800  | -0.06809800 | H         | 1.03066600  | 4.26861200  | 0.94707100  |
| H            | -1.34470400 | 3.98847200  | 1.45276200  | H         | 0.68034600  | 1.29934000  | -2.18111900 |
| H            | 1.06914100  | 4.24275800  | 0.93506600  | H         | -1.47435400 | 0.61221500  | -1.30044400 |
| H            | 0.67789700  | 1.22914600  | -2.17730700 | O         | 2.23940800  | 3.13337600  | -1.03545800 |
| H            | -1.50811600 | 0.60340000  | -1.28437800 | O         | -2.89840200 | 1.97987500  | 0.65974500  |
| O            | 2.23249500  | 3.09877400  | -1.07928000 | C         | -2.37973000 | 3.14611800  | -1.29769800 |
| O            | -2.89283700 | 1.98729200  | 0.66781500  | H         | -3.07662400 | 2.47771400  | -1.81365600 |
| C            | -2.37434600 | 3.19416400  | -1.25643400 | H         | -2.92963700 | 4.03192600  | -0.96510300 |
| H            | -3.07089400 | 2.54275900  | -1.79377600 | H         | -1.59374700 | 3.45814600  | -1.99083100 |
| H            | -2.92790600 | 4.06096900  | -0.88322200 | C         | -2.72214000 | 1.01749300  | 1.74025600  |
| H            | -1.59273000 | 3.53759600  | -1.93882700 | H         | -2.15296300 | 1.46059000  | 2.56697300  |
| C            | -2.71525300 | 1.00716300  | 1.72891900  | H         | -3.73751500 | 0.80611000  | 2.08139600  |
|              |             |             |             | C         | -1.97033600 | -0.11738900 | 1.10369000  |

|           |             |             |             |              |             |             |             |
|-----------|-------------|-------------|-------------|--------------|-------------|-------------|-------------|
| C         | -0.66732500 | 0.32057000  | 0.80149400  | C            | -3.71710000 | -1.97558500 | 0.46529900  |
| H         | -0.35059000 | 1.05966800  | 1.54553100  | C            | -1.96740200 | -2.55842200 | -1.06404000 |
| C         | -2.65232700 | -1.20425200 | 0.42985000  | C            | -4.25943100 | -3.25704800 | 0.34490500  |
| C         | -1.90202700 | -2.20085700 | -0.24716200 | H            | -4.21091800 | -1.27167100 | 1.12906600  |
| C         | -4.05788500 | -1.34822900 | 0.42651400  | C            | -2.48855800 | -3.84185600 | -1.19023300 |
| C         | -2.51702600 | -3.25750900 | -0.89324100 | H            | -1.12908400 | -2.26691400 | -1.70230200 |
| H         | -0.81970600 | -2.12087200 | -0.24550300 | C            | -3.64046300 | -4.20509600 | -0.48038200 |
| C         | -4.68664000 | -2.41167000 | -0.21135400 | H            | -5.15653600 | -3.50499300 | 0.90135200  |
| H         | -4.68184600 | -0.60314100 | 0.90770600  | H            | -2.03606500 | -4.57069600 | -1.85604500 |
| C         | -3.91760800 | -3.37860000 | -0.87846900 | C            | 1.60974500  | -3.96163200 | -0.06944000 |
| H         | -1.93816800 | -4.01787800 | -1.40839200 | H            | 1.32796900  | -4.47741500 | -0.97990700 |
| H         | -5.76849400 | -2.47602300 | -0.19282800 | C            | 2.67708600  | -3.14758500 | 0.12826700  |
| C         | 2.34288000  | -1.30468200 | 1.48522900  | H            | 3.43089200  | -2.85760500 | -0.59365100 |
| H         | 1.96550700  | -1.16484300 | 2.49193600  | C            | 0.87140000  | -4.06828900 | 1.27980200  |
| C         | 1.87627500  | -2.21306800 | 0.53594800  | C            | 0.29036900  | -2.64934000 | 1.52334800  |
| H         | 1.07620000  | -2.93249200 | 0.66891300  | C            | 1.39460900  | -1.81223700 | 1.72855800  |
| C         | 3.74143000  | -0.85003800 | 1.00255600  | H            | 1.39543900  | -0.86349700 | 2.25241700  |
| C         | 3.39995500  | -0.02118400 | -0.25890900 | C            | 2.64889800  | -2.71671400 | 1.60710000  |
| C         | 2.93835900  | -0.92879700 | -1.20744800 | H            | -0.72443900 | -2.46843800 | 1.85517400  |
| H         | 2.82534800  | -0.75959300 | -2.27207100 | H            | 0.16511000  | -4.89337800 | 1.37588600  |
| C         | 2.98359100  | -2.32224100 | -0.53991900 | H            | 3.57664800  | -2.30317600 | 2.00584600  |
| H         | 3.68502600  | 1.01103000  | -0.43054900 | C            | 2.09163200  | -4.02376700 | 2.24569500  |
| H         | 4.37566300  | -0.36346200 | 1.74489200  | H            | 1.80196100  | -3.90049700 | 3.29531700  |
| H         | 2.92706500  | -3.18357400 | -1.20758600 | H            | 2.76853400  | -4.87984300 | 2.13774300  |
| C         | 4.25207500  | -2.16515000 | 0.34750400  | Rh           | 0.71624400  | -1.60757600 | -0.36090700 |
| H         | 5.17082100  | -2.02558600 | -0.23507300 | C            | 4.02937300  | 3.39158700  | -0.34744800 |
| H         | 4.38052800  | -2.98465800 | 1.06532700  | C            | 4.42945100  | 3.75188500  | 0.88010700  |
| Rh        | 1.21396700  | -0.16372100 | -0.03215700 | C            | 5.57666300  | 3.09395500  | 1.55113500  |
| O         | -4.42555500 | -4.45824300 | -1.52578500 | C            | 6.22746000  | 1.98875200  | 0.80587700  |
| C         | -5.83398000 | -4.64768700 | -1.53467800 | C            | 5.82335100  | 1.63162200  | -0.42120500 |
| H         | -6.34735800 | -3.81660200 | -2.03484700 | C            | 4.71844600  | 2.33277500  | -1.17783600 |
| H         | -6.00675400 | -5.56847300 | -2.09405700 | H            | 3.17885200  | 3.87444700  | -0.82656800 |
| H         | -6.23008300 | -4.75996200 | -0.51731800 | H            | 3.93332000  | 4.53641800  | 1.44513600  |
| <b>50</b> |             |             |             | H            | 7.04520600  | 1.48724500  | 1.31660100  |
| C         | -5.69438500 | 1.64781800  | 0.15224000  | H            | 6.30306200  | 0.81277400  | -0.95573300 |
| C         | -6.17496200 | 2.41681600  | 1.13957400  | O            | 5.95764500  | 3.43431700  | 2.66600100  |
| C         | -5.67213800 | 3.79233100  | 1.37068000  | O            | 3.76261800  | 1.38180100  | -1.68570600 |
| C         | -4.57673400 | 4.24806300  | 0.48178900  | C            | 5.30328400  | 2.98093400  | -2.44971600 |
| C         | -4.10156400 | 3.47561400  | -0.50530300 | H            | 5.76704100  | 2.21041800  | -3.07358500 |
| C         | -4.65201200 | 2.10860200  | -0.84182100 | H            | 4.49910900  | 3.45089700  | -3.02435400 |
| H         | -6.05878700 | 0.63317400  | -0.00226500 | H            | 6.05190900  | 3.73561300  | -2.19255300 |
| H         | -6.94722500 | 2.07187400  | 1.82217600  | C            | 3.06398400  | 0.62320500  | -0.69395000 |
| H         | -4.18132500 | 5.23979900  | 0.68480200  | H            | 3.76929400  | 0.03402000  | -0.08888000 |
| H         | -3.28895500 | 3.81689800  | -1.14519200 | H            | 2.52805200  | 1.28696200  | 0.00087400  |
| O         | -6.12673000 | 4.50744700  | 2.25833400  | C            | 2.10294400  | -0.26568800 | -1.36110700 |
| O         | -3.59909800 | 1.14142100  | -0.96328300 | C            | 1.42879600  | -0.81637500 | -2.25999900 |
| C         | -5.28363800 | 2.15048900  | -2.25015300 | H            | 1.13228400  | -0.98326400 | -3.27901900 |
| H         | -4.52650800 | 2.45100700  | -2.98128900 | O            | -4.08331600 | -5.48418600 | -0.66974200 |
| H         | -5.64123600 | 1.15141200  | -2.51851400 | C            | -5.25955300 | -5.89258600 | 0.00739800  |
| H         | -6.11922200 | 2.85556400  | -2.28447600 | H            | -6.12745700 | -5.28648100 | -0.28579900 |
| C         | -2.79445700 | 0.92663200  | 0.20880700  | H            | -5.43029900 | -6.93024600 | -0.28588600 |
| H         | -2.17989000 | 1.81182400  | 0.41792900  | H            | -5.13840600 | -5.84067200 | 1.09799700  |
| H         | -3.45247500 | 0.77733600  | 1.07886500  | <b>51-ts</b> |             |             |             |
| C         | -1.90750600 | -0.27013500 | -0.02890200 | C            | -5.85931600 | -1.90352500 | 0.32793400  |
| C         | -0.56314800 | -0.12186600 | -0.08861500 | C            | -7.03544500 | -1.26061800 | 0.32360000  |
| H         | -0.15926300 | 0.89076300  | 0.00171000  | C            | -7.45062400 | -0.39876400 | -0.80913600 |
| C         | -2.54902900 | -1.59307700 | -0.21267900 | C            | -6.47198800 | -0.25070200 | -1.91310000 |

|    |             |             |             |           |             |             |             |
|----|-------------|-------------|-------------|-----------|-------------|-------------|-------------|
| C  | -5.29701300 | -0.89540700 | -1.90343000 | H         | 4.01088000  | -3.03972700 | -3.39069200 |
| C  | -4.87474300 | -1.86001600 | -0.81817100 | H         | 5.14788000  | -4.03471100 | -2.44155800 |
| H  | -5.56431400 | -2.52614200 | 1.17147600  | C         | 2.90687500  | -0.52010600 | -0.56788300 |
| H  | -7.73858500 | -1.33252200 | 1.14903700  | H         | 3.11521100  | -0.81618800 | 0.47152400  |
| H  | -6.76300700 | 0.41456700  | -2.72164100 | H         | 3.62248600  | 0.27676500  | -0.81951700 |
| H  | -4.57923500 | -0.77008400 | -2.71292300 | C         | 1.52684300  | -0.01100000 | -0.66522700 |
| O  | -8.53691900 | 0.17106700  | -0.82560700 | C         | 0.36660300  | -0.22024900 | -1.16022100 |
| O  | -3.54710500 | -1.54921400 | -0.35687700 | H         | -0.23356700 | -0.82631600 | -1.81703200 |
| C  | -4.73835900 | -3.27277500 | -1.42468500 | O         | 0.49693700  | -2.38970800 | 5.10707500  |
| H  | -3.98929100 | -3.25747100 | -2.22272000 | C         | 0.03966300  | -3.62711600 | 5.62448000  |
| H  | -4.40383800 | -3.97425300 | -0.65372700 | H         | 0.14884800  | -4.43830900 | 4.89181700  |
| H  | -5.69315500 | -3.61594400 | -1.83322300 | H         | 0.66655000  | -3.84036200 | 6.49256600  |
| C  | -3.39602200 | -0.27957500 | 0.31421300  | H         | -1.01044400 | -3.57046100 | 5.94157600  |
| H  | -3.82709600 | 0.51444200  | -0.30784500 |           |             |             |             |
| H  | -3.94613700 | -0.29971500 | 1.26470200  | <b>52</b> |             |             |             |
| C  | -1.91984900 | -0.01682900 | 0.54510400  | C         | 6.41875000  | 0.71504800  | 0.07723000  |
| C  | -1.26733700 | 0.73803800  | -0.38082100 | C         | 7.22076500  | 0.42406300  | 1.11157800  |
| H  | -1.86880100 | 1.08573500  | -1.22387800 | C         | 7.41100100  | -0.96838700 | 1.58257800  |
| C  | -1.30257000 | -0.63812500 | 1.73700800  | C         | 6.62399200  | -2.01106200 | 0.88099200  |
| C  | -1.76577900 | -1.87422800 | 2.22307100  | C         | 5.82724700  | -1.71583600 | -0.15574600 |
| C  | -0.24142000 | -0.03377000 | 2.44365800  | C         | 5.68662700  | -0.32794400 | -0.73699800 |
| C  | -1.19596800 | -2.49379100 | 3.33588400  | H         | 6.26509500  | 1.74262500  | -0.24806500 |
| H  | -2.56554300 | -2.38207200 | 1.69396500  | H         | 7.76066600  | 1.19063600  | 1.66125800  |
| C  | 0.33853000  | -0.63950400 | 3.55063700  | H         | 6.72903500  | -3.02306300 | 1.26303700  |
| H  | 0.11296800  | 0.94287800  | 2.12421400  | H         | 5.24746400  | -2.48925200 | -0.65778000 |
| C  | -0.13257700 | -1.87799100 | 4.00756800  | O         | 8.16328000  | -1.24193800 | 2.51281300  |
| H  | -1.58199600 | -3.45336400 | 3.66184600  | O         | 4.30536300  | 0.02951000  | -0.89810000 |
| H  | 1.14831900  | -0.16077700 | 4.09344700  | C         | 6.24153800  | -0.32261100 | -2.17772200 |
| C  | 2.08583000  | 3.11941700  | 0.67945400  | H         | 5.69219900  | -1.04977100 | -2.78423100 |
| H  | 2.80801000  | 2.56411200  | 1.26589600  | H         | 6.09970600  | 0.66903400  | -2.61875700 |
| C  | 2.09585500  | 3.32574600  | -0.69228100 | H         | 7.30587700  | -0.57449500 | -2.18800500 |
| H  | 2.82213800  | 2.95770100  | -1.40737800 | C         | 3.51396800  | 0.06698200  | 0.30088700  |
| C  | 1.06383600  | 4.12405900  | 1.26135800  | H         | 3.22001600  | -0.94993100 | 0.59488200  |
| C  | -0.28286400 | 3.57870300  | 0.72874400  | H         | 4.11627200  | 0.48340600  | 1.12183600  |
| C  | -0.26496600 | 3.78277700  | -0.65109600 | C         | 2.29430000  | 0.91447400  | 0.04582000  |
| H  | -1.11402600 | 3.75943900  | -1.32461600 | C         | 1.06526400  | 0.33659800  | 0.07629100  |
| C  | 1.08599500  | 4.46011100  | -0.97416000 | C         | 2.53425200  | 2.35171300  | -0.24706000 |
| H  | -1.14629300 | 3.36559900  | 1.34684400  | C         | 1.97880700  | 2.96796400  | -1.37743700 |
| H  | 1.12233000  | 4.30296300  | 2.33569300  | C         | 3.35452100  | 3.14530400  | 0.58039000  |
| H  | 1.16479300  | 4.94517800  | -1.94794600 | C         | 2.20721200  | 4.31400200  | -1.67485300 |
| C  | 1.28010300  | 5.32786800  | 0.30146200  | H         | 1.36789200  | 2.37581500  | -2.05231500 |
| H  | 0.51719100  | 6.10769900  | 0.41075200  | C         | 3.59109200  | 4.48445900  | 0.30078100  |
| H  | 2.28271800  | 5.76577300  | 0.37888200  | H         | 3.80029100  | 2.71198600  | 1.47185000  |
| Rh | 0.54043500  | 1.75474300  | -0.23539400 | C         | 3.01728500  | 5.08225000  | -0.83171700 |
| C  | 5.45772900  | -1.36687500 | -1.81415900 | H         | 1.76037800  | 4.74287100  | -2.56481200 |
| C  | 6.58580500  | -1.17554300 | -1.11598100 | H         | 4.21279100  | 5.09412100  | 0.94948800  |
| C  | 6.81780700  | -1.84138200 | 0.18882700  | C         | -0.65146100 | -2.74505500 | -0.68116900 |
| C  | 5.71358000  | -2.68939900 | 0.69855100  | H         | 0.17594700  | -2.28807900 | -1.21237600 |
| C  | 4.58611500  | -2.87604800 | -0.00217100 | C         | -0.85545900 | -2.74734800 | 0.72504500  |
| C  | 4.34909600  | -2.29855300 | -1.37926000 | H         | -0.21113800 | -2.29619800 | 1.47163400  |
| H  | 5.29330500  | -0.86552000 | -2.76704300 | C         | -1.42878600 | -3.96749000 | -1.22327300 |
| H  | 7.38134400  | -0.52266000 | -1.46515200 | C         | -2.89638200 | -3.54814900 | -0.98831800 |
| H  | 5.87128900  | -3.14044600 | 1.67457000  | C         | -3.09462800 | -3.55069700 | 0.37257400  |
| H  | 3.77526000  | -3.48933200 | 0.38816900  | H         | -4.03214100 | -3.44702000 | 0.90679000  |
| O  | 7.85925900  | -1.68585400 | 0.81814700  | C         | -1.75532800 | -3.97186200 | 1.01683800  |
| O  | 3.07173000  | -1.63962000 | -1.44608000 | H         | -3.64182700 | -3.43151300 | -1.76640600 |
| C  | 4.22444800  | -3.45019000 | -2.39870800 | H         | -1.17552700 | -4.29500600 | -2.23252300 |
| H  | 3.39549200  | -4.10461600 | -2.11136800 | H         | -1.80157100 | -4.30421600 | 2.05485100  |



|           |             |             |             |              |             |             |             |
|-----------|-------------|-------------|-------------|--------------|-------------|-------------|-------------|
| C         | -1.23675800 | -4.97390200 | -0.05343300 | C            | -2.89744000 | 4.99137800  | 0.22269700  |
| H         | -1.86406500 | -5.86891900 | -0.14637400 | H            | -1.77667200 | 3.53939100  | -0.88272400 |
| H         | -0.18972000 | -5.26153200 | 0.09885200  | C            | -4.12006000 | 4.16370100  | 2.13865900  |
| Rh        | -2.24361300 | -1.45846400 | -0.19355400 | H            | -3.92293600 | 2.07115200  | 2.53762300  |
| C         | -5.29973800 | 0.76950900  | 1.35025300  | C            | -3.75042400 | 5.22976700  | 1.31074500  |
| C         | -5.90265400 | 1.82946300  | 1.90577700  | H            | -2.62647600 | 5.82619200  | -0.41636700 |
| C         | -6.36470600 | 2.98023200  | 1.09168400  | H            | -4.77397600 | 4.31710400  | 2.98982700  |
| C         | -6.06338800 | 2.92043100  | -0.35969200 | C            | 1.06213500  | -1.21786900 | 2.03150300  |
| C         | -5.46156900 | 1.85897600  | -0.91300900 | H            | 0.10983800  | -0.71190600 | 2.11425000  |
| C         | -5.09444500 | 0.61512200  | -0.13839000 | C            | 2.30210100  | -0.74673300 | 2.47389800  |
| H         | -4.95009100 | -0.06456800 | 1.95694300  | H            | 2.49388100  | 0.19968400  | 2.96508100  |
| H         | -6.07362400 | 1.90305900  | 2.97620800  | C            | 1.22419100  | -2.74089500 | 1.83804900  |
| H         | -6.35454700 | 3.78962200  | -0.94291200 | C            | 2.19208500  | -2.83231400 | 0.63837900  |
| H         | -5.23778600 | 1.82680700  | -1.97799800 | C            | 3.41247500  | -2.37127500 | 1.08036400  |
| O         | -6.94752700 | 3.93516800  | 1.59236000  | H            | 4.36055000  | -2.44275500 | 0.56360900  |
| O         | -3.71876500 | 0.26068200  | -0.42133100 | C            | 3.22731700  | -1.98043300 | 2.56128600  |
| C         | -5.92937100 | -0.57166500 | -0.65596400 | H            | 1.98540600  | -3.34597000 | -0.29270300 |
| H         | -5.74322900 | -0.71882900 | -1.72461100 | H            | 0.30145700  | -3.31677600 | 1.76061300  |
| H         | -5.65091400 | -1.48671500 | -0.12357600 | H            | 4.14007600  | -1.86077200 | 3.14575200  |
| H         | -6.99529300 | -0.38231500 | -0.50126200 | C            | 2.20326000  | -3.06526800 | 3.00331400  |
| C         | -2.67847700 | 1.23422400  | -0.07755100 | H            | 2.60887100  | -4.08317100 | 2.95634700  |
| C         | -1.42834200 | 0.39066600  | -0.06096100 | H            | 1.77197500  | -2.87473200 | 3.99341000  |
| C         | -0.21901700 | 1.00014200  | -0.02133000 | Rh           | 2.21506900  | -0.53884200 | 0.28670700  |
| H         | 1.03128800  | -0.73849100 | 0.23642000  | C            | 2.55673700  | 0.55121000  | -1.71793100 |
| H         | -2.91617200 | 1.66530300  | 0.90458100  | C            | 3.08791500  | -0.73484800 | -1.76543500 |
| H         | -2.68624500 | 2.04143700  | -0.82391700 | C            | 4.54411800  | -0.97580900 | -1.59365500 |
| H         | -0.18055400 | 2.09363900  | -0.03933600 | C            | 5.36906000  | 0.19790700  | -1.22404600 |
| O         | 3.31173700  | 6.40254600  | -1.02160900 | C            | 4.86385000  | 1.43980000  | -1.21859200 |
| C         | 2.75230600  | 7.05805500  | -2.14681400 | C            | 3.45162700  | 1.78151300  | -1.64333600 |
| H         | 3.10541600  | 8.09003700  | -2.09973600 | H            | 1.56346300  | 0.73549800  | -2.11633300 |
| H         | 3.08780800  | 6.60368500  | -3.08891600 | H            | 2.52754600  | -1.55867400 | -2.20136300 |
| H         | 1.65438900  | 7.04934700  | -2.11597100 | H            | 6.40865600  | -0.00753100 | -0.98180800 |
|           |             |             |             | H            | 5.48061200  | 2.29828000  | -0.95727700 |
|           |             |             |             | O            | 5.03976000  | -2.09198300 | -1.74101200 |
|           |             |             |             | O            | 2.91785500  | 2.82339300  | -0.82761900 |
|           |             |             |             | C            | 3.51411800  | 2.41511700  | -3.05388300 |
|           |             |             |             | H            | 4.13962300  | 3.31295200  | -3.02483800 |
|           |             |             |             | H            | 2.50638800  | 2.70961500  | -3.36368400 |
|           |             |             |             | H            | 3.92849100  | 1.71250900  | -3.78259000 |
|           |             |             |             | C            | 2.54177000  | 2.44492200  | 0.50932300  |
|           |             |             |             | C            | 1.47398200  | 1.38014300  | 0.48720800  |
|           |             |             |             | C            | 0.17826300  | 1.76010500  | 0.58153700  |
|           |             |             |             | H            | -0.76783700 | -0.12913100 | 0.11891300  |
|           |             |             |             | H            | 3.43614200  | 2.12860300  | 1.06821200  |
|           |             |             |             | H            | 2.17355000  | 3.37946600  | 0.95015900  |
|           |             |             |             | H            | -0.02773000 | 2.80930400  | 0.80586000  |
|           |             |             |             | O            | -4.16233700 | 6.52103800  | 1.47272500  |
|           |             |             |             | C            | -5.03169700 | 6.81668900  | 2.55287100  |
|           |             |             |             | H            | -4.56543500 | 6.59030300  | 3.52121900  |
|           |             |             |             | H            | -5.23262900 | 7.88795800  | 2.49212100  |
|           |             |             |             | H            | -5.97828300 | 6.26549800  | 2.47276400  |
|           |             |             |             |              |             |             |             |
| <b>53</b> |             |             |             | <b>54-ts</b> |             |             |             |
| C         | -4.19333400 | -1.83135200 | -1.68149600 | C            | -4.17023800 | -1.74367000 | -1.95583000 |
| C         | -5.47004100 | -1.87120500 | -2.08702500 | C            | -5.48498600 | -1.79710500 | -2.20988600 |
| C         | -6.58092800 | -2.13239200 | -1.14012100 | C            | -6.46531400 | -2.18721000 | -1.16772100 |
| C         | -6.20443500 | -2.29209800 | 0.28566800  | C            | -5.91350800 | -2.47023400 | 0.17986000  |
| C         | -4.92616700 | -2.25511100 | 0.68597600  | C            | -4.59781600 | -2.41831500 | 0.42859900  |
| C         | -3.75551300 | -2.10465500 | -0.25960700 |              |             |             |             |
| H         | -3.38520600 | -1.62316400 | -2.38119000 |              |             |             |             |
| H         | -5.75571200 | -1.70505100 | -3.12224000 |              |             |             |             |
| H         | -7.02692300 | -2.43355400 | 0.98166500  |              |             |             |             |
| H         | -4.66172900 | -2.36413600 | 1.73690100  |              |             |             |             |
| O         | -7.74784400 | -2.19656000 | -1.51200000 |              |             |             |             |
| O         | -2.84925800 | -1.09049600 | 0.20095500  |              |             |             |             |
| C         | -2.91530000 | -3.39940400 | -0.23269800 |              |             |             |             |
| H         | -2.56164800 | -3.58557100 | 0.78669100  |              |             |             |             |
| H         | -2.04426200 | -3.28404000 | -0.88580600 |              |             |             |             |
| H         | -3.50649600 | -4.25541600 | -0.56970800 |              |             |             |             |
| C         | -3.38406100 | 0.22701500  | 0.29621700  |              |             |             |             |
| H         | -4.11024700 | 0.28025400  | 1.12246600  |              |             |             |             |
| H         | -3.94679600 | 0.47740500  | -0.61810300 |              |             |             |             |
| C         | -2.28368200 | 1.24587500  | 0.50605600  |              |             |             |             |
| C         | -0.97936300 | 0.90286100  | 0.38460700  |              |             |             |             |
| C         | -2.77538000 | 2.62116400  | 0.79478300  |              |             |             |             |
| C         | -2.42450600 | 3.71046200  | -0.02787700 |              |             |             |             |
| C         | -3.63611300 | 2.88063400  | 1.87109300  |              |             |             |             |

|    |             |             |             |           |             |             |             |
|----|-------------|-------------|-------------|-----------|-------------|-------------|-------------|
| C  | -3.55622400 | -2.12274300 | -0.62682000 | C         | 2.63871900  | 2.55471000  | 0.22992500  |
| H  | -3.45938300 | -1.44288700 | -2.72404900 | C         | 1.59240800  | 1.47230000  | 0.15429500  |
| H  | -5.89825700 | -1.55062700 | -3.18418700 | C         | 0.28655200  | 1.78991900  | 0.38912200  |
| H  | -6.64042600 | -2.71554100 | 0.94947100  | H         | -0.60390300 | -0.09372300 | -0.18063000 |
| H  | -4.20455600 | -2.61899600 | 1.42422800  | H         | 3.56410900  | 2.20774100  | 0.71505600  |
| O  | -7.66696700 | -2.25702700 | -1.40197300 | H         | 2.27932400  | 3.44470400  | 0.75835200  |
| O  | -2.64737300 | -1.10271000 | -0.17660400 | H         | 0.06675600  | 2.78249400  | 0.78592600  |
| C  | -2.66151700 | -3.36502600 | -0.81878500 | O         | -4.12790800 | 6.33747900  | 1.75965100  |
| H  | -2.18260600 | -3.62361400 | 0.13103900  | C         | -5.02814100 | 6.52310700  | 2.84033500  |
| H  | -1.87822800 | -3.14496300 | -1.55113400 | H         | -4.58067000 | 6.21821400  | 3.79568800  |
| H  | -3.25038600 | -4.21767500 | -1.16822600 | H         | -5.24451600 | 7.59250300  | 2.86935600  |
| C  | -3.22307600 | 0.16837800  | 0.09621500  | H         | -5.96305300 | 5.96810400  | 2.68672700  |
| H  | -3.89404700 | 0.10270200  | 0.96727800  |           |             |             |             |
| H  | -3.85381000 | 0.49550600  | -0.74669300 | <b>55</b> |             |             |             |
| C  | -2.15056500 | 1.20689200  | 0.34528400  | C         | 4.87306700  | -2.24875700 | 0.52929200  |
| C  | -0.83845600 | 0.91305400  | 0.15454300  | C         | 6.17402700  | -1.98936700 | 0.33903200  |
| C  | -2.66754000 | 2.53878100  | 0.75345000  | C         | 6.67754600  | -1.41507400 | -0.93225300 |
| C  | -2.31634600 | 3.70596300  | 0.04344600  | C         | 5.65677200  | -1.10639400 | -1.96322200 |
| C  | -3.55629300 | 2.68447800  | 1.82944500  | C         | 4.35690200  | -1.36833600 | -1.76918100 |
| C  | -2.81446600 | 4.95043800  | 0.40163000  | C         | 3.81316900  | -2.04007400 | -0.52850900 |
| H  | -1.65441900 | 3.62473600  | -0.81354200 | H         | 4.51253800  | -2.65902500 | 1.47150000  |
| C  | -4.06387800 | 3.93008600  | 2.20494600  | H         | 6.92117300  | -2.17788000 | 1.10522200  |
| H  | -3.84506500 | 1.81365500  | 2.41185000  | H         | 6.02708000  | -0.65203100 | -2.87829900 |
| C  | -3.69340400 | 5.07452900  | 1.48861300  | H         | 3.61377000  | -1.12892700 | -2.52857500 |
| H  | -2.54571700 | 5.84444600  | -0.15245400 | O         | 7.86960600  | -1.19304700 | -1.11542500 |
| H  | -4.73817200 | 3.99397000  | 3.05139500  | O         | 2.69952000  | -1.29926200 | 0.00189200  |
| C  | 1.44186800  | -0.92137400 | 2.45557200  | C         | 3.20494600  | -3.40431100 | -0.91470600 |
| H  | 0.54195300  | -0.34320100 | 2.62626300  | H         | 2.40669300  | -3.25731300 | -1.64916400 |
| C  | 2.75586800  | -0.49062400 | 2.58348200  | H         | 2.77393800  | -3.87877200 | -0.02737600 |
| H  | 3.09570400  | 0.49342500  | 2.88492000  | H         | 3.96746600  | -4.06312800 | -1.33941400 |
| C  | 1.49527500  | -2.46379900 | 2.36686800  | C         | 2.98232300  | 0.01548600  | 0.45967300  |
| C  | 2.16049800  | -2.69270400 | 0.98938000  | H         | 3.44150600  | 0.61032200  | -0.34566500 |
| C  | 3.47891700  | -2.25706000 | 1.11306900  | H         | 3.72195400  | -0.00986300 | 1.27697300  |
| H  | 4.29511900  | -2.47948500 | 0.43556200  | C         | 1.72021300  | 0.69666300  | 0.94512500  |
| C  | 3.63650600  | -1.76073200 | 2.56980500  | C         | 0.54979500  | 0.01697500  | 1.00791400  |
| H  | 1.76081500  | -3.32814600 | 0.20743700  | C         | 1.90610800  | 2.10940300  | 1.37133600  |
| H  | 0.55763000  | -2.99125500 | 2.54755500  | C         | 1.54508800  | 2.53502700  | 2.66625400  |
| H  | 4.65817100  | -1.64662800 | 2.93449000  | C         | 2.48793700  | 3.06146600  | 0.52058900  |
| C  | 2.69812100  | -2.75750600 | 3.30875100  | C         | 1.73582200  | 3.84669600  | 3.07793700  |
| H  | 3.04495700  | -3.79639000 | 3.25217600  | H         | 1.12572700  | 1.81446800  | 3.36258900  |
| H  | 2.50755700  | -2.47878600 | 4.35232400  | C         | 2.68349300  | 4.38636800  | 0.91801000  |
| Rh | 2.24727200  | -0.57281700 | 0.39943500  | H         | 2.78244000  | 2.77587700  | -0.48605500 |
| C  | 2.04929600  | 0.74531100  | -1.63003100 | C         | 2.30502700  | 4.78701500  | 2.20504300  |
| C  | 2.44629400  | -0.64298500 | -1.73416000 | H         | 1.46203300  | 4.16787200  | 4.07815900  |
| C  | 3.85064800  | -1.03700200 | -1.93706300 | H         | 3.12661600  | 5.08863100  | 0.22118900  |
| C  | 4.86152900  | 0.04929900  | -1.84444300 | C         | -0.99504300 | 2.19729500  | -1.60541200 |
| C  | 4.51091000  | 1.34154700  | -1.84524900 | H         | -0.02016500 | 2.45032200  | -1.20537800 |
| C  | 3.08517700  | 1.83895500  | -1.96347500 | C         | -2.23153200 | 2.52063600  | -1.06934800 |
| H  | 1.06450000  | 0.96082500  | -2.03526800 | H         | -2.42914400 | 3.08644800  | -0.16637800 |
| H  | 1.71456900  | -1.36444600 | -2.09569400 | C         | -1.25788700 | 1.69213200  | -3.04493600 |
| H  | 5.90157200  | -0.26714100 | -1.82006800 | C         | -1.99178600 | 0.34837400  | -2.80741700 |
| H  | 5.25892100  | 2.13184500  | -1.80229000 | C         | -3.23290000 | 0.68506500  | -2.25727400 |
| O  | 4.19538900  | -2.20022500 | -2.16001700 | H         | -4.09781800 | 0.03609500  | -2.20243700 |
| O  | 2.91207200  | 2.97717800  | -1.11047100 | C         | -3.27541000 | 2.22521700  | -2.16905700 |
| C  | 2.84214000  | 2.35542200  | -3.39220600 | H         | -1.73240000 | -0.60785800 | -3.24505700 |
| H  | 3.57033900  | 3.13646900  | -3.63366500 | H         | -0.39391300 | 1.66152600  | -3.71038600 |
| H  | 1.83861700  | 2.78822900  | -3.46176600 | H         | -4.25990000 | 2.67603000  | -2.03651700 |
| H  | 2.94049000  | 1.54572600  | -4.12148600 | C         | -2.45848400 | 2.60005700  | -3.43896000 |

|           |             |             |             |           |             |             |             |
|-----------|-------------|-------------|-------------|-----------|-------------|-------------|-------------|
| H         | -2.94446300 | 2.28631100  | -4.37059400 | H         | -1.70614200 | 4.15759600  | -0.16332300 |
| H         | -2.19946000 | 3.66487700  | -3.48646000 | C         | -3.60555700 | 3.34139000  | 3.11284600  |
| Rh        | -1.79485700 | 0.33224100  | -0.63843400 | H         | -3.29269400 | 1.28656900  | 2.61441800  |
| C         | -2.01740000 | -1.71277200 | 1.31128700  | C         | -3.39056800 | 4.67500300  | 2.74470100  |
| C         | -2.07437600 | -1.76762600 | -0.22336700 | H         | -2.54612100 | 5.99551600  | 1.27987300  |
| C         | -3.29904600 | -2.21640200 | -0.89193800 | H         | -4.13435100 | 3.09168600  | 4.02560600  |
| C         | -4.53870600 | -2.29996700 | -0.07085300 | C         | 0.60508900  | -1.42624100 | 1.62269400  |
| C         | -4.53191700 | -2.26205700 | 1.26688400  | H         | -0.27466500 | -1.04749700 | 1.11604000  |
| C         | -3.29351400 | -2.11127400 | 2.12084600  | C         | 1.64464900  | -0.67149700 | 2.19011800  |
| H         | -1.16374500 | -2.27854400 | 1.70372300  | H         | 1.71822800  | 0.40933700  | 2.20901300  |
| H         | -1.18363400 | -2.19674700 | -0.69212100 | C         | 0.71795000  | -2.84114400 | 2.23669200  |
| H         | -5.45956200 | -2.45256900 | -0.62995500 | C         | 2.02485000  | -3.33973300 | 1.57870500  |
| H         | -5.45938500 | -2.36067400 | 1.83074100  | C         | 3.05867800  | -2.58551600 | 2.14542000  |
| O         | -3.35491400 | -2.49617200 | -2.09666700 | H         | 4.12062000  | -2.80179000 | 2.10448400  |
| O         | -3.50871900 | -1.00900400 | 3.03906500  | C         | 2.39249600  | -1.62155200 | 3.15374100  |
| C         | -3.09265000 | -3.35719600 | 2.98444000  | H         | 2.12414100  | -4.25924800 | 1.01255900  |
| H         | -3.98639800 | -3.55972700 | 3.58447400  | H         | -0.15484600 | -3.48838900 | 2.13773700  |
| H         | -2.24782700 | -3.20557000 | 3.66506200  | H         | 3.04959100  | -1.15607500 | 3.88952300  |
| H         | -2.89272600 | -4.23097000 | 2.35530700  | C         | 1.22064900  | -2.50257400 | 3.66701200  |
| C         | -3.12414800 | 0.18958400  | 2.37090100  | H         | 1.55712900  | -3.38516500 | 4.22481000  |
| C         | -1.87918600 | -0.22024200 | 1.60994400  | H         | 0.48868700  | -1.93897300 | 4.25832900  |
| C         | -0.74869000 | 0.55096000  | 1.41455200  | Rh        | 2.35377800  | -1.56149100 | 0.35609700  |
| H         | 0.58210800  | -1.02598900 | 0.71288600  | C         | 2.12471600  | 1.35807800  | -1.65519000 |
| H         | -3.92887700 | 0.54305100  | 1.70873800  | C         | 2.30138700  | -0.14697100 | -1.45149200 |
| H         | -2.93285600 | 0.95484700  | 3.13000300  | C         | 3.58242100  | -0.74246700 | -1.44891100 |
| H         | -0.77961300 | 1.58656400  | 1.74399000  | C         | 4.79641700  | 0.08544700  | -1.53221300 |
| O         | 2.44982600  | 6.04708500  | 2.70218900  | C         | 4.71529200  | 1.38468100  | -1.84076600 |
| C         | 3.03195300  | 7.03771400  | 1.86916400  | C         | 3.42207400  | 2.12159000  | -2.12392800 |
| H         | 2.43438800  | 7.20495300  | 0.96326600  | H         | 1.37124500  | 1.48852600  | -2.44250300 |
| H         | 3.05109000  | 7.95366300  | 2.46226100  | H         | 1.48811700  | -0.77947400 | -1.81227700 |
| H         | 4.05726100  | 6.77083400  | 1.58086900  | H         | 5.74432200  | -0.41355300 | -1.34895600 |
|           |             |             |             | H         | 5.61052100  | 1.99935000  | -1.91742400 |
| <b>56</b> |             |             |             | O         | 3.68001600  | -2.01834900 | -1.21917100 |
| C         | -4.04145400 | -1.08070300 | -2.46156600 | O         | 3.44461800  | 3.35149600  | -1.36578200 |
| C         | -5.37054300 | -1.19234400 | -2.59253300 | C         | 3.36870600  | 2.52153400  | -3.60025400 |
| C         | -6.20173500 | -1.86359800 | -1.56415300 | H         | 4.25577900  | 3.10224100  | -3.87559300 |
| C         | -5.48579800 | -2.36286100 | -0.36463700 | H         | 2.48259100  | 3.13928100  | -3.78305300 |
| C         | -4.15627900 | -2.25218200 | -0.23986500 | H         | 3.32406900  | 1.63237300  | -4.23825000 |
| C         | -3.26019100 | -1.66723900 | -1.30746500 | C         | 2.81850700  | 3.10015100  | -0.10995500 |
| H         | -3.44127800 | -0.57374900 | -3.21570900 | C         | 1.67537600  | 2.17884000  | -0.44645700 |
| H         | -5.90485400 | -0.79101600 | -3.44939300 | C         | 0.45648600  | 2.22775600  | 0.12321800  |
| H         | -6.10517700 | -2.81676500 | 0.40427800  | H         | -0.46170400 | 0.56000300  | -0.91550900 |
| H         | -3.64196900 | -2.61446200 | 0.64923200  | H         | 3.53104200  | 2.63003300  | 0.59125000  |
| O         | -7.41535600 | -1.98588100 | -1.69017500 | H         | 2.50415800  | 4.06023600  | 0.31044600  |
| O         | -2.36862200 | -0.68734600 | -0.74533200 | H         | 0.29711300  | 2.94815300  | 0.92412200  |
| C         | -2.31895800 | -2.76797900 | -1.84057400 | O         | -3.81388200 | 5.75729900  | 3.45740700  |
| H         | -1.71256100 | -3.16376500 | -1.01972300 | C         | -4.53500100 | 5.53274200  | 4.65828000  |
| H         | -1.64449900 | -2.34450300 | -2.59157200 | H         | -3.93152700 | 4.98701300  | 5.39578000  |
| H         | -2.89125300 | -3.58335400 | -2.29168400 | H         | -4.77651400 | 6.52170000  | 5.05192400  |
| C         | -2.98149100 | 0.45703300  | -0.15915300 | H         | -5.46504700 | 4.97906700  | 4.47332300  |
| H         | -3.57344600 | 0.16208500  | 0.71994600  |           |             |             |             |
| H         | -3.69328700 | 0.91487200  | -0.86552600 | <b>57</b> |             |             |             |
| C         | -1.93282900 | 1.47443600  | 0.23816100  | C         | -3.46864600 | -2.38800600 | -2.50559800 |
| C         | -0.66749100 | 1.38076800  | -0.23612900 | C         | -4.50297900 | -3.22857900 | -2.64671900 |
| C         | -2.42372500 | 2.57188200  | 1.11215200  | C         | -4.73918500 | -4.34232500 | -1.69647500 |
| C         | -2.22535000 | 3.92328500  | 0.76120700  | C         | -3.79398300 | -4.44521400 | -0.55782600 |
| C         | -3.12895500 | 2.31306000  | 2.29726200  | C         | -2.75840900 | -3.60562300 | -0.42385300 |
| C         | -2.69534600 | 4.95703800  | 1.55890900  | C         | -2.42253000 | -2.52077500 | -1.42164900 |

|    |             |             |             |              |             |             |             |
|----|-------------|-------------|-------------|--------------|-------------|-------------|-------------|
| H  | -3.31200000 | -1.56505600 | -3.20133500 | C            | -0.51531000 | 3.36033600  | -0.27570700 |
| H  | -5.22224700 | -3.13188100 | -3.45548500 | C            | -1.54942300 | 2.70019800  | 0.28246300  |
| H  | -3.99656100 | -5.23682500 | 0.15853000  | H            | -1.42898400 | 0.87502600  | -0.87986500 |
| H  | -2.07556700 | -3.68587400 | 0.42100100  | H            | 0.69706700  | 4.72726500  | 0.89674400  |
| O  | -5.67207400 | -5.12601700 | -1.83483600 | H            | -0.89859900 | 5.38989900  | 0.45937000  |
| O  | -2.21470000 | -1.26320700 | -0.75291100 | H            | -2.07870700 | 3.18309400  | 1.10252600  |
| C  | -1.05801300 | -2.83052400 | -2.07224300 | O            | 1.52529600  | 0.33654200  | 1.35963500  |
| H  | -0.28345300 | -2.88385800 | -1.30037700 | H            | 1.25351700  | 0.98163000  | 0.65430100  |
| H  | -0.79176600 | -2.02983200 | -2.76946400 | C            | 0.37305700  | -0.29287500 | 1.93253200  |
| H  | -1.09319000 | -3.78042000 | -2.61303700 | H            | -0.23590800 | 0.45290300  | 2.45346100  |
| C  | -3.34221800 | -0.72249100 | -0.06686300 | H            | -0.23567900 | -0.78673600 | 1.16765900  |
| H  | -3.60481000 | -1.35986200 | 0.79047600  | H            | 0.73653800  | -1.02767900 | 2.65393600  |
| H  | -4.22493200 | -0.72193500 | -0.72676700 | O            | -6.79818200 | 2.82412500  | 4.09864600  |
| C  | -3.05220600 | 0.68879600  | 0.40144400  | C            | -7.14484200 | 2.14079500  | 5.29238300  |
| C  | -2.00908600 | 1.38131600  | -0.11563400 | H            | -6.27616700 | 2.01323200  | 5.95205800  |
| C  | -4.01516900 | 1.22924200  | 1.39666700  | H            | -7.88650400 | 2.76706700  | 5.79145700  |
| C  | -4.67555700 | 2.45617300  | 1.17946700  | H            | -7.58422600 | 1.15679300  | 5.08127800  |
| C  | -4.33124400 | 0.53059300  | 2.57167900  |              |             |             |             |
| C  | -5.59011500 | 2.96054400  | 2.09347300  | <b>58-ts</b> |             |             |             |
| H  | -4.47394800 | 3.00983300  | 0.26724300  | C            | 0.87120600  | -2.44506900 | 0.82078400  |
| C  | -5.24688800 | 1.02497900  | 3.50305800  | C            | 0.81498200  | -3.56423200 | 0.08224400  |
| H  | -3.83847500 | -0.41415500 | 2.78677400  | C            | 1.46551400  | -4.82533400 | 0.50673600  |
| C  | -5.88461000 | 2.24845500  | 3.26619700  | C            | 2.24053500  | -4.76870300 | 1.76991100  |
| H  | -6.10046500 | 3.90232600  | 1.91689600  | C            | 2.30009000  | -3.65199400 | 2.50858300  |
| H  | -5.44930900 | 0.45325800  | 4.40165600  | C            | 1.57027500  | -2.37477500 | 2.15937900  |
| C  | 3.02757300  | -2.70083100 | 1.33073400  | H            | 0.38174400  | -1.53045800 | 0.48803200  |
| H  | 2.01229800  | -3.01535000 | 1.54880800  | H            | 0.29153400  | -3.59895100 | -0.87011100 |
| C  | 3.87391400  | -1.93568000 | 2.15890700  | H            | 2.75760200  | -5.68152200 | 2.05371800  |
| H  | 3.63917100  | -1.53106300 | 3.13787900  | H            | 2.88135700  | -3.61473600 | 3.42874900  |
| C  | 3.94946600  | -3.40503300 | 0.30659000  | O            | 1.38041400  | -5.85618300 | -0.15383400 |
| C  | 4.38936700  | -2.18580900 | -0.53608400 | O            | 2.48292300  | -1.25777300 | 2.21199500  |
| C  | 5.23621000  | -1.42360800 | 0.29185200  | C            | 0.53581600  | -2.06266800 | 3.25923900  |
| H  | 5.91289700  | -0.63769200 | -0.02462300 | H            | 1.04565200  | -1.94728700 | 4.22115400  |
| C  | 5.31220900  | -2.17496900 | 1.64063400  | H            | 0.01818400  | -1.12681900 | 3.02602600  |
| H  | 4.29506400  | -2.10516800 | -1.61315600 | H            | -0.20132800 | -2.86701100 | 3.33693900  |
| H  | 3.52346400  | -4.24878000 | -0.23768900 | C            | 3.52845400  | -1.23718300 | 1.24408000  |
| H  | 6.12693200  | -1.89814800 | 2.31059900  | H            | 4.48542600  | -1.25619500 | 1.78706200  |
| C  | 5.21893900  | -3.64975500 | 1.16540800  | H            | 3.50940700  | -2.14544200 | 0.62692500  |
| H  | 6.08540700  | -3.96501600 | 0.57126100  | C            | 3.47802700  | -0.01889000 | 0.33647300  |
| H  | 5.04994100  | -4.35510500 | 1.98813900  | C            | 2.51970400  | 0.92292100  | 0.48844300  |
| Rh | 3.23384600  | -0.72924700 | 0.50570600  | C            | 4.55278500  | 0.02220700  | -0.69256100 |
| C  | 0.35841100  | 2.94777000  | -1.46640900 | C            | 5.90638600  | -0.03486400 | -0.33011600 |
| C  | 1.22152300  | 1.71459400  | -1.25450400 | C            | 4.25452700  | 0.07847900  | -2.06838800 |
| C  | 2.57458600  | 1.77661000  | -1.04652900 | C            | 6.92753700  | -0.02032900 | -1.28346800 |
| C  | 3.22036600  | 3.10745200  | -0.95265800 | H            | 6.18071900  | -0.06692500 | 0.72103400  |
| C  | 2.57815600  | 4.23423200  | -1.27908400 | C            | 5.25698300  | 0.09256900  | -3.02883300 |
| C  | 1.15082600  | 4.26469100  | -1.78467800 | H            | 3.21550100  | 0.10002300  | -2.38446400 |
| H  | -0.30998900 | 2.75326300  | -2.31756500 | C            | 6.60514400  | 0.04412200  | -2.64388200 |
| H  | 0.76673400  | 0.74121600  | -1.42875600 | H            | 7.95996700  | -0.05378700 | -0.95426500 |
| H  | 4.25831400  | 3.11269800  | -0.62848600 | H            | 5.02144100  | 0.13227000  | -4.08791200 |
| H  | 3.06959900  | 5.20417900  | -1.22398500 | C            | -4.76939100 | -1.05793800 | 0.42180500  |
| O  | 3.38276500  | 0.73974800  | -0.92977700 | H            | -4.92533900 | -0.79101600 | 1.46119500  |
| O  | 0.43686100  | 5.31291300  | -1.09004000 | C            | -5.09615400 | -0.28475300 | -0.70382700 |
| C  | 1.12745800  | 4.62971500  | -3.26915500 | H            | -5.55524000 | 0.69742400  | -0.70722100 |
| H  | 1.65493400  | 5.57367200  | -3.44447300 | C            | -4.51609000 | -2.49260500 | -0.09431900 |
| H  | 0.09140500  | 4.74444500  | -3.60746300 | C            | -3.18911200 | -2.27098700 | -0.85899900 |
| H  | 1.61309900  | 3.84524700  | -3.85901500 | C            | -3.51723100 | -1.49327800 | -1.99047200 |
| C  | -0.07948900 | 4.75249000  | 0.11145000  | H            | -2.92848900 | -1.37994200 | -2.89444100 |

|           |             |             |             |    |             |             |             |
|-----------|-------------|-------------|-------------|----|-------------|-------------|-------------|
| C         | -5.04241000 | -1.24436800 | -1.91476100 | H  | 0.17542200  | -1.08742100 | -3.00889300 |
| H         | -2.29473400 | -2.86681300 | -0.71259500 | H  | 0.45332900  | -2.75401000 | -3.57497600 |
| H         | -4.52493600 | -3.29057100 | 0.64878800  | C  | -3.09940100 | -1.67105100 | -0.90384900 |
| H         | -5.52911000 | -0.90609400 | -2.83015000 | H  | -4.06128400 | -2.00182200 | -1.32538800 |
| C         | -5.52833400 | -2.56931900 | -1.26869500 | H  | -2.76641400 | -2.46845400 | -0.22477800 |
| H         | -5.37210800 | -3.44303400 | -1.91288000 | C  | -3.31217400 | -0.38753200 | -0.11897100 |
| H         | -6.57308300 | -2.52744100 | -0.93740900 | C  | -2.55213300 | 0.70129100  | -0.37533300 |
| Rh        | -2.97371600 | -0.19966800 | -0.38695800 | C  | -4.40153200 | -0.44998900 | 0.89003700  |
| C         | -1.46304800 | 4.80184500  | 0.37292900  | C  | -4.43593200 | -1.47085600 | 1.86179800  |
| C         | -2.35923300 | 3.81616700  | 0.23926700  | C  | -5.45769200 | 0.47230800  | 0.88597000  |
| C         | -2.06173200 | 2.44670000  | 0.69442400  | C  | -5.46268600 | -1.55037200 | 2.79195900  |
| C         | -0.71940700 | 2.07397400  | 0.96849300  | H  | -3.63161500 | -2.20012300 | 1.90559200  |
| C         | 0.38704900  | 3.14072600  | 1.05082300  | C  | -6.49983000 | 0.40510600  | 1.81439800  |
| C         | -0.09680300 | 4.63292100  | 1.00218000  | H  | -5.47576900 | 1.25118000  | 0.12904400  |
| H         | -1.69388900 | 5.81645800  | 0.05145200  | C  | -6.50531900 | -0.61130200 | 2.77654500  |
| H         | -3.34900700 | 3.98594400  | -0.17701000 | H  | -5.47890600 | -2.33029500 | 3.54689300  |
| H         | -0.64577800 | 1.28934500  | 1.72612600  | H  | -7.29786200 | 1.13769200  | 1.76995600  |
| H         | 0.90245900  | 3.00279300  | 2.00981400  | C  | 4.82139000  | -0.11926100 | -0.36482700 |
| O         | -3.04081300 | 1.61777900  | 0.73220600  | H  | 4.91442400  | 0.42757800  | -1.29686800 |
| O         | 0.86174600  | 5.33208500  | 0.18028000  | C  | 5.02300000  | 0.37944700  | 0.93004600  |
| C         | -0.07685000 | 5.31518000  | 2.37252200  | H  | 5.29708900  | 1.39123100  | 1.20763000  |
| H         | 0.93841800  | 5.28226600  | 2.78261600  | C  | 4.85876100  | -1.66081500 | -0.24823800 |
| H         | -0.38032900 | 6.36448900  | 2.28868800  | C  | 3.53515000  | -1.90483200 | 0.51389700  |
| H         | -0.75972900 | 4.81007200  | 3.06379900  | C  | 3.74166900  | -1.40517100 | 1.81880200  |
| C         | 1.36461900  | 4.41101400  | -0.78438700 | H  | 3.15866800  | -1.64129500 | 2.70206800  |
| C         | 1.44873800  | 3.09815300  | -0.04904100 | C  | 5.18646000  | -0.85532100 | 1.84609500  |
| C         | 2.38503300  | 2.15595300  | -0.26839200 | H  | 2.76729100  | -2.60310300 | 0.19947700  |
| H         | 1.80034200  | 0.75061400  | 1.28311900  | H  | 4.99971100  | -2.22002500 | -1.17415300 |
| H         | 2.33055500  | 4.78483200  | -1.13781800 | H  | 5.62405200  | -0.68149700 | 2.83000200  |
| H         | 0.68177900  | 4.34686000  | -1.65085200 | C  | 5.89885400  | -1.84873900 | 0.88851300  |
| H         | 3.11406700  | 2.33508000  | -1.05696500 | H  | 5.92913200  | -2.87359800 | 1.27865500  |
| O         | -0.90735500 | 0.10869500  | -0.70453300 | H  | 6.90736700  | -1.52357100 | 0.60553500  |
| H         | -0.64506200 | 1.13293800  | -0.06644200 | Rh | 2.89186900  | 0.12019600  | 0.60836200  |
| C         | -0.27447100 | 0.00044600  | -1.96763400 | C  | 0.67352400  | 5.17165600  | -0.66352300 |
| H         | -0.59248300 | -0.92622200 | -2.46152000 | C  | 1.64248900  | 4.38809000  | -0.16366100 |
| H         | -0.51878500 | 0.84506800  | -2.62849900 | C  | 1.58279300  | 2.93109400  | -0.27336700 |
| H         | 0.81380300  | -0.03841100 | -1.83404800 | C  | 0.43626900  | 2.29751100  | -1.02046500 |
| O         | 7.51520000  | 0.06273200  | -3.66031000 | C  | -0.84714700 | 3.15656600  | -1.17707300 |
| C         | 8.89287700  | 0.00756400  | -3.32894200 | C  | -0.61578700 | 4.69872000  | -1.29581300 |
| H         | 9.43085600  | 0.03057900  | -4.27848000 | H  | 0.75580600  | 6.25457000  | -0.58105400 |
| H         | 9.19699100  | 0.86921600  | -2.71963500 | H  | 2.52000800  | 4.79958500  | 0.32827500  |
| H         | 9.14303800  | -0.91795200 | -2.79326200 | H  | 0.22956500  | 1.34298000  | -0.52314700 |
| <b>59</b> |             |             |             | H  | -1.34215700 | 2.81912300  | -2.09546300 |
| C         | -0.34023800 | -2.72380700 | -0.92587900 | O  | 2.51646800  | 2.26079600  | 0.19195900  |
| C         | -0.10736300 | -3.92478400 | -0.37308300 | O  | -1.67280400 | 5.30944400  | -0.52459200 |
| C         | -0.71404200 | -5.16839200 | -0.90206000 | C  | -0.73871400 | 5.22932900  | -2.72423200 |
| C         | -1.65279400 | -5.00790000 | -2.03958700 | H  | -1.72634400 | 4.97626000  | -3.12290200 |
| C         | -1.88552400 | -3.81126500 | -2.59597400 | H  | -0.62902700 | 6.31878400  | -2.74416000 |
| C         | -1.19491500 | -2.53987800 | -2.15922500 | H  | 0.02974000  | 4.79117700  | -3.37070000 |
| H         | 0.09470500  | -1.81157100 | -0.51356300 | C  | -1.97591100 | 4.42926000  | 0.56435500  |
| H         | 0.52550700  | -4.04096200 | 0.50309000  | C  | -1.84657200 | 3.05096500  | -0.03093200 |
| H         | -2.14118100 | -5.91492500 | -2.38593200 | C  | -2.60175500 | 1.98598200  | 0.29851100  |
| H         | -2.58372200 | -3.69981400 | -3.42441800 | H  | -1.82304400 | 0.58810300  | -1.16974100 |
| O         | -0.47302000 | -6.26930100 | -0.41580800 | H  | -2.98419600 | 4.66866000  | 0.91400700  |
| O         | -2.16004800 | -1.48945200 | -1.95776700 | H  | -1.27246800 | 4.59458200  | 1.39834100  |
| C         | -0.31267000 | -2.01890000 | -3.31246000 | H  | -3.30896000 | 2.09503900  | 1.11852200  |
| H         | -0.93501900 | -1.81798600 | -4.19062000 | O  | 0.91103300  | -0.06736900 | 0.94376800  |
|           |             |             |             | C  | 0.39993700  | -0.85826400 | 1.97321100  |

|   |             |             |             |
|---|-------------|-------------|-------------|
| H | 0.82639200  | -1.88102500 | 2.00425700  |
| H | 0.56265900  | -0.41519800 | 2.97305600  |
| H | -0.68997800 | -0.97416500 | 1.84724500  |
| H | 0.83851900  | 2.05990800  | -2.01787300 |
| O | -7.46751900 | -0.77787300 | 3.72933800  |
| C | -8.54434500 | 0.14380900  | 3.76527000  |
| H | -9.12549400 | 0.12323500  | 2.83356900  |
| H | -9.18144800 | -0.17136700 | 4.59372900  |
| H | -8.19353100 | 1.16845400  | 3.94754200  |

**62**

|   |             |             |             |
|---|-------------|-------------|-------------|
| C | -3.83947600 | 0.70502000  | -0.36605700 |
| C | -3.16662600 | 1.77396900  | -0.81691100 |
| C | -1.78413700 | 2.07046100  | -0.38274000 |
| C | -1.22423900 | 1.19044900  | 0.72679400  |
| C | -1.72597100 | -0.26695100 | 0.69012400  |
| C | -3.27429400 | -0.37021800 | 0.54183200  |
| H | -4.86353300 | 0.52174100  | -0.69018300 |
| H | -3.61015000 | 2.47987900  | -1.51496700 |
| H | -1.45906300 | -0.75062500 | 1.63980400  |
| O | -1.15364000 | 3.00852400  | -0.84611500 |
| O | -3.48712800 | -1.63516600 | -0.10942700 |
| C | -4.02674300 | -0.41412900 | 1.87087200  |
| H | -3.68539600 | -1.27160100 | 2.46006800  |
| H | -5.10327200 | -0.52100100 | 1.70156100  |
| H | -3.85845400 | 0.50373500  | 2.44443500  |
| C | -2.44729200 | -1.79437700 | -1.07319400 |
| H | -2.72975900 | -1.32648200 | -2.03110300 |
| H | -2.31733500 | -2.86775900 | -1.24243900 |
| C | -1.22393800 | -1.12470000 | -0.46657000 |
| C | 0.01744500  | -1.34235900 | -0.93303200 |
| H | 0.08425900  | -1.96884100 | -1.82538700 |
| C | 1.32662700  | -0.87985800 | -0.44442300 |
| C | 2.38247700  | -0.73209300 | -1.35753700 |
| C | 1.61338000  | -0.63264000 | 0.91414200  |
| C | 3.65493300  | -0.31959300 | -0.96191500 |
| H | 2.20214000  | -0.93560200 | -2.41055200 |
| C | 2.87504200  | -0.22844400 | 1.32643800  |
| H | 0.84367900  | -0.78689700 | 1.66374100  |
| C | 3.90697200  | -0.05862100 | 0.39040900  |
| H | 4.43377200  | -0.20983600 | -1.70781800 |
| H | 3.09196800  | -0.04542000 | 2.37429700  |
| H | -0.13515600 | 1.25284400  | 0.69498100  |
| H | -1.53993700 | 1.64707600  | 1.67748300  |
| O | 5.10689300  | 0.34587200  | 0.89598000  |
| C | 6.18370500  | 0.54412400  | -0.00585900 |
| H | 5.95031600  | 1.31821900  | -0.74881200 |
| H | 7.02817200  | 0.87176300  | 0.60321300  |
| H | 6.45155200  | -0.38527500 | -0.52607300 |

**63**

|   |            |             |             |
|---|------------|-------------|-------------|
| C | 3.59872400 | -1.04572200 | -0.38663600 |
| C | 2.80261200 | -1.83786400 | -1.12062200 |
| C | 1.36451500 | -2.00479000 | -0.81088100 |
| C | 0.88990700 | -1.37634500 | 0.49112600  |
| C | 1.59117500 | -0.04489100 | 0.81739400  |
| C | 3.13995300 | -0.16896100 | 0.76410200  |
| H | 4.65736000 | -0.95202100 | -0.62752600 |

|   |             |             |             |
|---|-------------|-------------|-------------|
| H | 3.17772500  | -2.39790000 | -1.97393500 |
| H | 1.31862400  | 0.24893000  | 1.84010400  |
| O | 0.62323600  | -2.65451800 | -1.53320100 |
| O | 3.59468800  | 1.16859600  | 0.49902400  |
| C | 3.78443300  | -0.60865100 | 2.07784000  |
| H | 3.52652400  | 0.10098500  | 2.87078200  |
| H | 4.87494600  | -0.63366900 | 1.98149700  |
| H | 3.44260400  | -1.60800600 | 2.36756400  |
| C | 2.67683300  | 1.76559300  | -0.41594100 |
| H | 2.99863700  | 1.59212100  | -1.45619200 |
| H | 2.69629200  | 2.84498900  | -0.23244800 |
| C | 1.32493600  | 1.12522000  | -0.13083800 |
| C | 0.15647600  | 1.56347800  | -0.63059200 |
| C | -1.17129200 | 1.00444000  | -0.23572000 |
| C | -2.02402600 | 0.41299900  | -1.17627000 |
| C | -1.62968600 | 1.09892600  | 1.09122100  |
| C | -3.27715500 | -0.08973200 | -0.81853500 |
| H | -1.69769900 | 0.31356700  | -2.20818700 |
| C | -2.87563900 | 0.60942500  | 1.46330900  |
| H | -0.99819100 | 1.57218900  | 1.83872600  |
| C | -3.70972300 | 0.00727000  | 0.50951200  |
| H | -3.89657100 | -0.55658100 | -1.57571500 |
| H | -3.22905300 | 0.68552300  | 2.48706700  |
| H | -0.19513900 | -1.27635600 | 0.45643600  |
| H | 1.11849400  | -2.09596100 | 1.29247100  |
| O | -4.91121700 | -0.44558300 | 0.97173400  |
| C | -5.78863200 | -1.07720100 | 0.05360700  |
| H | -5.33653600 | -1.97748400 | -0.38329900 |
| H | -6.67171900 | -1.36039700 | 0.62944900  |
| H | -6.08687500 | -0.39618100 | -0.75475100 |
| C | 0.09280400  | 2.71567700  | -1.61350100 |
| H | 1.08000100  | 3.06068300  | -1.93277000 |
| H | -0.46521200 | 2.42572200  | -2.51298300 |
| H | -0.44514300 | 3.56866500  | -1.17820100 |

**24-L2**

|    |              |             |             |
|----|--------------|-------------|-------------|
| Rh | -1.67815200  | 0.06833900  | 0.40568300  |
| O  | 0.04639400   | 1.33688400  | 0.44128900  |
| C  | -0.06607700  | 2.50390200  | 1.21097000  |
| H  | -0.89038000  | 3.13362300  | 0.84094500  |
| H  | -0.25013800  | 2.30227300  | 2.27949800  |
| H  | 0.85062700   | 3.10797300  | 1.14545500  |
| C  | -8.78513600  | 1.27792400  | 2.12694500  |
| C  | -7.54753100  | 0.64169700  | 1.83813900  |
| C  | -7.05230600  | 0.62410700  | 0.49431300  |
| C  | -7.83519200  | 1.27277100  | -0.50485200 |
| C  | -9.02962700  | 1.88443800  | -0.19510600 |
| C  | -9.51633000  | 1.88641000  | 1.13384700  |
| H  | -9.14095300  | 1.27560600  | 3.15465000  |
| H  | -7.48130000  | 1.28441700  | -1.52861800 |
| H  | -9.60413300  | 2.37022800  | -0.97945000 |
| H  | -10.46186800 | 2.36968000  | 1.36488200  |
| C  | -6.78299600  | 0.01809900  | 2.85263300  |
| H  | -7.15676000  | 0.02204700  | 3.87405900  |
| C  | -5.79845900  | -0.02449700 | 0.20125800  |
| C  | -5.58431500  | -0.58316400 | 2.55988100  |
| C  | -5.06554200  | -0.61590000 | 1.23369800  |
| H  | -5.02314000  | -1.04812500 | 3.36025800  |

|   |             |             |             |    |             |             |             |
|---|-------------|-------------|-------------|----|-------------|-------------|-------------|
| P | -3.36938100 | -1.35404100 | 0.94846200  | C  | -0.71109200 | 4.32738800  | -3.44967900 |
| C | -2.97431500 | -2.06405900 | 2.62431200  | H  | -2.11710200 | 5.88480300  | -2.94780600 |
| C | -3.32715200 | -3.35814300 | 3.03410100  | H  | 0.54611800  | 2.59162100  | -3.71170100 |
| C | -2.27205900 | -1.24159500 | 3.52191300  | H  | -0.16079200 | 4.93842400  | -4.16110400 |
| C | -2.99328600 | -3.81490300 | 4.31140100  | Rh | 1.67812200  | -0.06830800 | 0.40566900  |
| H | -3.85519100 | -4.01945000 | 2.35515800  | O  | -0.04642200 | -1.33683700 | 0.44118700  |
| C | -1.94855600 | -1.69477600 | 4.80151300  | C  | 0.06603900  | -2.50396700 | 1.21067400  |
| H | -1.96843400 | -0.24964700 | 3.19409100  | H  | 0.25025400  | -2.30252500 | 2.27921400  |
| C | -2.30767500 | -2.98460000 | 5.19968100  | H  | -0.85072400 | -3.10795100 | 1.14518600  |
| H | -3.26877700 | -4.82323800 | 4.61002500  | H  | 0.89024000  | -3.13370800 | 0.84045700  |
| H | -1.40727100 | -1.04336300 | 5.48308400  | C  | 8.78505100  | -1.27857000 | 2.12667100  |
| H | -2.04929800 | -3.34262200 | 6.19301700  | C  | 7.54749900  | -0.64218000 | 1.83795300  |
| C | -3.71967900 | -2.85998300 | -0.06731100 | C  | 7.05225100  | -0.62439700 | 0.49413100  |
| C | -4.90411700 | -3.60582800 | 0.04271700  | C  | 7.83504800  | -1.27306700 | -0.50511500 |
| C | -2.72366300 | -3.29097400 | -0.95660200 | C  | 9.02942500  | -1.88489900 | -0.19544900 |
| C | -5.08491100 | -4.76507100 | -0.71311300 | C  | 9.51615900  | -1.88704400 | 1.13349600  |
| H | -5.69141600 | -3.27856000 | 0.71649300  | H  | 9.14088900  | -1.27639000 | 3.15437600  |
| C | -2.90507300 | -4.45418300 | -1.70776200 | H  | 7.48113000  | -1.28458000 | -1.52888200 |
| H | -1.80793200 | -2.71335600 | -1.05075400 | H  | 9.60385100  | -2.37068600 | -0.97985500 |
| C | -4.08360200 | -5.19256300 | -1.58783700 | H  | 10.46164600 | -2.37044900 | 1.36446900  |
| H | -6.00901400 | -5.33023800 | -0.62240300 | C  | 6.78302400  | -0.01861400 | 2.85252800  |
| H | -2.11946300 | -4.77989100 | -2.38371600 | H  | 7.15679800  | -0.02268200 | 3.87395300  |
| H | -4.22503200 | -6.09531900 | -2.17674900 | C  | 5.79845500  | 0.02436700  | 0.20115800  |
| C | -4.64003600 | -0.03722600 | -3.96973400 | C  | 5.58437900  | 0.58277500  | 2.55985600  |
| C | -5.72006800 | -0.85195600 | -3.55345900 | C  | 5.06558500  | 0.61570800  | 1.23367600  |
| C | -6.07534500 | -0.86514800 | -2.16565500 | H  | 5.02325400  | 1.04769000  | 3.36030400  |
| C | -5.33892600 | -0.05266100 | -1.22996300 | P  | 3.36942300  | 1.35394700  | 0.94858100  |
| C | -4.26031800 | 0.71734200  | -1.67634100 | C  | 2.97460300  | 2.06385800  | 2.62453600  |
| C | -3.93400200 | 0.71221800  | -3.06273200 | C  | 3.32764400  | 3.35784700  | 3.03444900  |
| H | -4.37356100 | -0.01107000 | -5.02404000 | C  | 2.27236100  | 1.24133800  | 3.52210800  |
| H | -3.11000600 | 1.31921600  | -3.41538400 | C  | 2.99396300  | 3.81446500  | 4.31185100  |
| C | -6.45503000 | -1.64072200 | -4.47906100 | H  | 3.85567300  | 4.01919200  | 2.35553000  |
| H | -6.16751900 | -1.61040100 | -5.52753200 | C  | 1.94905200  | 1.69439100  | 4.80180200  |
| C | -7.16302900 | -1.69834400 | -1.77258600 | H  | 1.96859800  | 0.24946200  | 3.19418300  |
| H | -7.44859600 | -1.73715100 | -0.72824800 | C  | 2.30836200  | 2.98412200  | 5.20009100  |
| C | -7.50418800 | -2.42613000 | -4.06230200 | H  | 3.26957500  | 4.82274000  | 4.61057000  |
| C | -7.85538400 | -2.45469600 | -2.69176700 | H  | 1.40778400  | 1.04295000  | 5.48335900  |
| H | -8.06078800 | -3.02540600 | -4.77782000 | H  | 2.05015500  | 3.34203900  | 6.19350800  |
| H | -8.67967100 | -3.08093600 | -2.36070100 | C  | 3.71974100  | 2.85994600  | -0.06712400 |
| P | -3.08784300 | 1.58463400  | -0.49939900 | C  | 4.90435400  | 3.60555900  | 0.04272700  |
| C | -4.15639500 | 2.74782700  | 0.46895400  | C  | 2.72363100  | 3.29120500  | -0.95618300 |
| C | -3.82709100 | 2.97418800  | 1.81297800  | C  | 5.08522500  | 4.76483400  | -0.71304100 |
| C | -5.23852600 | 3.44645900  | -0.08907700 | H  | 5.69174900  | 3.27805600  | 0.71628900  |
| C | -4.55260900 | 3.88938900  | 2.57834300  | C  | 2.90512400  | 4.45445300  | -1.70726200 |
| H | -3.00091600 | 2.42207000  | 2.25206900  | H  | 1.80778500  | 2.71375300  | -1.05021600 |
| C | -5.96413700 | 4.36107200  | 0.67515000  | C  | 4.08381400  | 5.19259800  | -1.58751400 |
| H | -5.52231200 | 3.26783900  | -1.12253600 | H  | 6.00946700  | 5.32980100  | -0.62247700 |
| C | -5.61998300 | 4.58657400  | 2.00998600  | H  | 2.11944300  | 4.78037600  | -2.38302400 |
| H | -4.28520600 | 4.05417800  | 3.61898300  | H  | 4.22530200  | 6.09537300  | -2.17638000 |
| H | -6.80431100 | 4.88842500  | 0.23136200  | C  | 4.63985300  | 0.03781100  | -3.96979000 |
| H | -6.18706700 | 5.29733800  | 2.60557200  | C  | 5.71992700  | 0.85244500  | -3.55343100 |
| C | -2.15786000 | 2.73588400  | -1.62986900 | C  | 6.07527100  | 0.86540200  | -2.16564200 |
| C | -2.53059200 | 4.06656300  | -1.87347700 | C  | 5.33889200  | 0.05274600  | -1.23005000 |
| C | -1.02656800 | 2.22503800  | -2.29055600 | C  | 4.26022100  | -0.71712700 | -1.67650500 |
| C | -1.81126200 | 4.85626700  | -2.77367200 | C  | 3.93382600  | -0.71175700 | -3.06288100 |
| H | -3.38141400 | 4.49851500  | -1.35894300 | H  | 4.37331100  | 0.01185700  | -5.02408300 |
| C | -0.31863300 | 3.00935700  | -3.20262000 | H  | 3.10977300  | -1.31864800 | -3.41558800 |
| H | -0.70136800 | 1.21312000  | -2.07562300 | C  | 6.45484200  | 1.64136300  | -4.47893800 |

|   |             |             |             |   |             |             |             |
|---|-------------|-------------|-------------|---|-------------|-------------|-------------|
| H | 6.16728200  | 1.61120300  | -5.52739800 | C | 3.37635800  | 4.71707300  | 1.33312700  |
| C | 7.16295100  | 1.69856900  | -1.77247400 | H | 3.66662900  | 3.01249900  | 0.05920700  |
| H | 7.44855800  | 1.73722500  | -0.72813400 | C | 1.17871200  | 4.96617300  | 2.30330000  |
| C | 7.50400900  | 2.42671700  | -4.06210100 | H | -0.25577500 | 3.44117700  | 1.77594600  |
| C | 7.85525700  | 2.45508200  | -2.69157100 | C | 2.48615700  | 5.42827400  | 2.14042800  |
| H | 8.06056900  | 3.02612200  | -4.77754600 | H | 4.39297500  | 5.07628500  | 1.19552000  |
| H | 8.67954500  | 3.08128800  | -2.36043600 | H | 0.47658400  | 5.51756900  | 2.92296200  |
| P | 3.08774500  | -1.58451600 | -0.49962100 | H | 2.80799400  | 6.34157700  | 2.63389500  |
| C | 4.15631600  | -2.74781100 | 0.46860700  | C | 2.13508200  | 1.32068700  | -1.41269300 |
| C | 3.82694100  | -2.97443500 | 1.81257000  | C | 3.43269700  | 0.80139900  | -1.28554600 |
| C | 5.23858700  | -3.44621400 | -0.08946500 | C | 1.68733200  | 1.73176200  | -2.67714400 |
| C | 4.55249800  | -3.88970500 | 2.57782700  | C | 4.26895300  | 0.70692000  | -2.39883800 |
| H | 3.00068300  | -2.42246000 | 2.25169700  | H | 3.78824300  | 0.46015700  | -0.31710600 |
| C | 5.96423800  | -4.36088700 | 0.67466000  | C | 2.52509300  | 1.63827300  | -3.78975800 |
| H | 5.52246700  | -3.26734000 | -1.12285900 | H | 0.67422600  | 2.11363800  | -2.77994400 |
| C | 5.61998900  | -4.58667600 | 2.00942300  | C | 3.81722200  | 1.12785500  | -3.65175100 |
| H | 4.28502800  | -4.05471000 | 3.61841600  | H | 5.26929800  | 0.29667100  | -2.28916400 |
| H | 6.80451500  | -4.88806200 | 0.23084800  | H | 2.16546600  | 1.95879300  | -4.76391300 |
| H | 6.18709600  | -5.29749500 | 2.60492500  | H | 4.46870100  | 1.05101200  | -4.51834800 |
| C | 2.15770900  | -2.73563500 | -1.63023300 | C | 0.06891200  | -2.41478600 | -3.15689900 |
| C | 2.53026700  | -4.06636600 | -1.87385700 | C | 1.35142500  | -2.73150900 | -2.64775000 |
| C | 1.02650900  | -2.22462300 | -2.29095600 | C | 1.69412100  | -2.30247200 | -1.32419500 |
| C | 1.81085000  | -4.85595400 | -2.77409200 | C | 0.72944800  | -1.57828100 | -0.53143000 |
| H | 3.38099700  | -4.49846200 | -1.35928500 | C | -0.52870900 | -1.28879500 | -1.07199700 |
| C | 0.31848400  | -3.00883300 | -3.20304400 | C | -0.83221300 | -1.71241300 | -2.39937200 |
| H | 0.70145200  | -1.21266000 | -2.07601700 | H | -0.19320700 | -2.73167500 | -4.16360700 |
| C | 0.71076200  | -4.32691600 | -3.45011400 | H | -1.80024900 | -1.47178400 | -2.82145800 |
| H | 2.11655600  | -5.88453100 | -2.94823100 | C | 2.29608600  | -3.45458300 | -3.42427600 |
| H | -0.54618900 | -2.59096400 | -3.71214400 | H | 2.00905400  | -3.77175400 | -4.42404200 |
| H | 0.16039700  | -4.93786800 | -4.16156100 | C | 3.00329300  | -2.61160900 | -0.85221300 |

## 25-L2

|    |             |             |             |   |             |             |             |
|----|-------------|-------------|-------------|---|-------------|-------------|-------------|
| Rh | -1.20437200 | 1.98699600  | -0.43813800 | C | 3.29935500  | -2.28845700 | 0.13825700  |
| O  | -2.82120800 | 3.03417900  | -0.90939100 | C | 3.54556100  | -3.74507600 | -2.92848200 |
| C  | -3.88552800 | 3.34336300  | -0.05869100 | C | 3.89960500  | -3.31202500 | -1.62897200 |
| H  | -3.57872700 | 3.56408700  | 0.97996700  | H | 4.26086700  | -4.29942500 | -3.52993900 |
| H  | -4.41053700 | 4.23736500  | -0.43622600 | H | 4.88977000  | -3.53297400 | -1.23921200 |
| H  | -4.63087500 | 2.52714800  | -0.01822700 | P | -1.77078900 | -0.14514200 | -0.27968000 |
| C  | 1.90757800  | -2.84534200 | 4.16172900  | C | -2.09298700 | -0.77218200 | 1.43053100  |
| C  | 1.74645100  | -1.83563900 | 3.17444000  | C | -2.48313200 | 0.16263200  | 2.40148100  |
| C  | 1.30255300  | -2.19198800 | 1.85932200  | C | -2.05525700 | -2.13082100 | 1.77650700  |
| C  | 1.03341500  | -3.56836000 | 1.60347600  | C | -2.84026700 | -0.25392000 | 3.68466800  |
| C  | 1.19500400  | -4.52406200 | 2.58165800  | H | -2.49831400 | 1.21693100  | 2.13808100  |
| C  | 1.63925700  | -4.16354700 | 3.87653600  | C | -2.40606200 | -2.54650200 | 3.06162700  |
| H  | 2.24633500  | -2.55114000 | 5.15232400  | H | -1.72977200 | -2.86956800 | 1.05087000  |
| H  | 0.69479600  | -3.86575300 | 0.61793000  | C | -2.80380600 | -1.60943800 | 4.01707000  |
| H  | 0.98138600  | -5.56562300 | 2.35664400  | H | -3.14266000 | 0.48194200  | 4.42523100  |
| H  | 1.76549200  | -4.92751100 | 4.63884200  | H | -2.35754500 | -3.60148100 | 3.31722500  |
| C  | 2.01576400  | -0.47537900 | 3.45999000  | H | -3.07719900 | -1.93399400 | 5.01769900  |
| H  | 2.36193600  | -0.20291700 | 4.45429000  | C | -3.35890600 | -0.57729600 | -1.14477600 |
| C  | 1.13405500  | -1.16832500 | 0.86014100  | C | -3.93545900 | -1.85565000 | -1.04076100 |
| C  | 1.84010400  | 0.49100500  | 2.50113300  | C | -3.99961600 | 0.39711700  | -1.92444100 |
| C  | 1.39365700  | 0.16537300  | 1.18994200  | C | -5.11939200 | -2.15633000 | -1.71181900 |
| H  | 2.04706700  | 1.52558000  | 2.74823200  | H | -3.46533800 | -2.62248600 | -0.43414500 |
| P  | 0.98755700  | 1.55130500  | 0.01557900  | C | -5.18972100 | 0.09004400  | -2.59280700 |
| C  | 1.65639700  | 3.06809800  | 0.85321400  | H | -3.58121500 | 1.40119200  | -1.97107000 |
| C  | 2.96609400  | 3.54608200  | 0.69289400  | C | -5.74913700 | -1.18295000 | -2.49311300 |
| C  | 0.76633900  | 3.79769200  | 1.66130200  | H | -5.55179900 | -3.14966800 | -1.62243300 |
|    |             |             |             | H | -5.67921900 | 0.85635600  | -3.18829300 |
|    |             |             |             | H | -6.67405700 | -1.41771400 | -3.01390100 |



**26-L2**

|    |             |             |             |
|----|-------------|-------------|-------------|
| Rh | -1.65662700 | 0.27095500  | -0.43068100 |
| O  | -3.19898500 | 1.71052800  | -0.65043400 |
| C  | -3.23468000 | 2.91696100  | -1.38896300 |
| H  | -3.75229600 | 2.76722800  | -2.34613700 |
| H  | -3.75509500 | 3.69414700  | -0.81531300 |
| H  | -2.21433000 | 3.25680100  | -1.58584500 |
| C  | 5.28696800  | 0.09869400  | -2.84834500 |
| C  | 4.03656500  | -0.29511300 | -2.29963200 |
| C  | 3.70165900  | 0.07071200  | -0.95574200 |
| C  | 4.65361600  | 0.83975900  | -0.22462100 |
| C  | 5.85621900  | 1.21039500  | -0.78405000 |
| C  | 6.18283200  | 0.83488000  | -2.10911800 |
| H  | 5.51935100  | -0.19384600 | -3.86956800 |
| H  | 4.42490300  | 1.13915600  | 0.79107800  |
| H  | 6.56202600  | 1.79654000  | -0.20153600 |
| H  | 7.13672200  | 1.13077800  | -2.53717800 |
| C  | 3.10296300  | -1.04476200 | -3.05398600 |
| H  | 3.35554100  | -1.33300800 | -4.07172100 |
| C  | 2.43213900  | -0.32724300 | -0.40150200 |
| C  | 1.89241200  | -1.40480200 | -2.51673700 |
| C  | 1.53061600  | -1.05131800 | -1.18572400 |
| H  | 1.20027400  | -1.97538800 | -3.12258400 |
| P  | -0.19190000 | -1.46719000 | -0.58678500 |
| C  | -0.80697600 | -2.60930700 | -1.91778700 |
| C  | -0.67094800 | -4.00432700 | -1.87579900 |
| C  | -1.45614600 | -2.02940700 | -3.02131700 |
| C  | -1.16896900 | -4.79782000 | -2.91301700 |
| H  | -0.18541600 | -4.47981500 | -1.03048300 |
| C  | -1.95161200 | -2.82153600 | -4.05755200 |
| H  | -1.58019900 | -0.94942400 | -3.05494200 |
| C  | -1.81004100 | -4.21041000 | -4.00506600 |
| H  | -1.05591500 | -5.87786800 | -2.86378800 |
| H  | -2.45450900 | -2.35425500 | -4.89993500 |
| H  | -2.19971700 | -4.83003000 | -4.80833400 |
| C  | 0.09287900  | -2.57326100 | 0.85906400  |
| C  | 1.13493300  | -3.51384600 | 0.90877900  |
| C  | -0.80219500 | -2.48627600 | 1.93343400  |
| C  | 1.26804600  | -4.36033500 | 2.00948600  |
| H  | 1.84964100  | -3.57870500 | 0.09271200  |
| C  | -0.66774700 | -3.33604700 | 3.03323900  |
| H  | -1.60534400 | -1.75688700 | 1.89930600  |
| C  | 0.36484500  | -4.27368400 | 3.07221200  |
| H  | 2.08121600  | -5.08060700 | 2.04152400  |
| H  | -1.37349000 | -3.26393800 | 3.85590800  |
| H  | 0.47078700  | -4.93300500 | 3.92976400  |
| C  | 1.69345600  | 0.77224300  | 3.72199100  |
| C  | 2.66271100  | -0.21964100 | 3.43676100  |
| C  | 2.88479000  | -0.59462000 | 2.07203100  |
| C  | 2.13026700  | 0.04457700  | 1.02318500  |
| C  | 1.17091800  | 1.00777300  | 1.34935000  |
| C  | 0.96966500  | 1.35909400  | 2.71515500  |
| H  | 1.52567700  | 1.06534900  | 4.75566400  |
| H  | 0.22992500  | 2.10904100  | 2.96623700  |
| C  | 3.41346800  | -0.84123500 | 4.47065700  |
| H  | 3.22911800  | -0.53761400 | 5.49841700  |
| C  | 3.85568200  | -1.60565300 | 1.81507400  |

|   |             |             |             |
|---|-------------|-------------|-------------|
| H | 4.03521900  | -1.91897900 | 0.79375200  |
| C | 4.35010900  | -1.80605900 | 4.18213600  |
| C | 4.56710500  | -2.19189600 | 2.83812500  |
| H | 4.91976000  | -2.27481400 | 4.97991000  |
| H | 5.30150700  | -2.96004500 | 2.61083200  |
| P | -0.02228400 | 1.72061700  | 0.10464700  |
| C | 1.00563700  | 2.43934200  | -1.25254000 |
| C | 0.50049600  | 2.38852900  | -2.55992200 |
| C | 2.22969200  | 3.08676100  | -1.02326700 |
| C | 1.19443900  | 2.98712300  | -3.61302100 |
| H | -0.43663300 | 1.86838900  | -2.74077000 |
| C | 2.92500500  | 3.68175100  | -2.07654200 |
| H | 2.64908400  | 3.11506600  | -0.02183000 |
| C | 2.40634300  | 3.63685500  | -3.37244600 |
| H | 0.79023100  | 2.94040800  | -4.62078000 |
| H | 3.87643600  | 4.17041700  | -1.88559900 |
| H | 2.94937600  | 4.10002100  | -4.19204700 |
| C | -0.69853700 | 3.21863000  | 0.96550800  |
| C | -0.08507700 | 4.48081900  | 0.89777800  |
| C | -1.87633500 | 3.07890300  | 1.71763700  |
| C | -0.63042400 | 5.57079200  | 1.57742400  |
| H | 0.81025500  | 4.62682400  | 0.30474800  |
| C | -2.42234700 | 4.17310400  | 2.39001400  |
| H | -2.39941400 | 2.13165000  | 1.74701800  |
| C | -1.79938000 | 5.41973200  | 2.32658900  |
| H | -0.14430100 | 6.54085400  | 1.51137900  |
| H | -3.35319900 | 4.04162000  | 2.93263300  |
| H | -2.22854100 | 6.27356400  | 2.84487100  |
| C | -3.95109900 | -1.34430100 | -0.64765800 |
| C | -3.89726500 | -2.72118900 | -0.34664600 |
| C | -4.10617500 | -3.14090000 | 0.96470000  |
| C | -4.34130700 | -2.18368900 | 1.97100600  |
| C | -4.37367700 | -0.83473300 | 1.65449500  |
| C | -4.20769900 | -0.36375500 | 0.32944900  |
| H | -3.90685700 | -1.04643700 | -1.69346200 |
| H | -3.71767400 | -3.43395300 | -1.14316900 |
| H | -4.50386800 | -2.53668000 | 2.98637000  |
| H | -4.57441400 | -0.10617200 | 2.43671000  |
| B | -4.52548600 | 1.19137800  | -0.06899400 |
| O | -5.57460700 | 1.19984100  | -1.07217400 |
| H | -5.92658800 | 2.10031600  | -1.13256600 |
| O | -4.81470100 | 2.06240700  | 1.07477500  |
| H | -5.72945400 | 1.89376000  | 1.34165100  |
| O | -4.10194300 | -4.44508000 | 1.38343500  |
| C | -3.92932100 | -5.45378000 | 0.40490600  |
| H | -2.96013700 | -5.36560900 | -0.10367100 |
| H | -3.97120900 | -6.40466700 | 0.94085200  |
| H | -4.72869800 | -5.42673100 | -0.34846200 |

**27-ts-L2**

|    |             |             |            |
|----|-------------|-------------|------------|
| Rh | 1.58697500  | 0.66034400  | 0.11253500 |
| O  | 2.94366700  | 2.37784800  | 0.22358600 |
| C  | 2.68022300  | 3.55478000  | 0.99007700 |
| H  | 2.60381000  | 3.32208300  | 2.05669800 |
| H  | 3.49269400  | 4.27439500  | 0.83213500 |
| H  | 1.74527500  | 3.98841700  | 0.63327000 |
| C  | -4.97436500 | -0.63734100 | 3.15211300 |
| C  | -3.70973600 | -0.81802400 | 2.52945100 |

|   |             |             |             |              |             |             |             |
|---|-------------|-------------|-------------|--------------|-------------|-------------|-------------|
| C | -3.54637400 | -0.50525300 | 1.14148900  | H            | 0.02511000  | 2.19651300  | 2.52063400  |
| C | -4.68343000 | -0.00399300 | 0.44236900  | C            | -3.60143600 | 3.38191700  | 1.82981100  |
| C | -5.89668000 | 0.16324600  | 1.07235900  | H            | -3.26180100 | 2.74174300  | -0.19512300 |
| C | -6.05022100 | -0.15882700 | 2.44185800  | C            | -3.06407900 | 3.50341700  | 3.11375800  |
| H | -5.07218800 | -0.88515700 | 4.20653200  | H            | -1.33782600 | 3.16359800  | 4.36208200  |
| H | -4.58998100 | 0.25190600  | -0.60586900 | H            | -4.62245000 | 3.69800400  | 1.63359500  |
| H | -6.74496700 | 0.54663700  | 0.51140600  | H            | -3.66531700 | 3.92073000  | 3.91730700  |
| H | -7.01373500 | -0.02519900 | 2.92633000  | C            | -0.02673000 | 3.29389200  | -1.28831100 |
| C | -2.59431200 | -1.30403000 | 3.25099400  | C            | -0.69986900 | 4.51612000  | -1.13478700 |
| H | -2.71196200 | -1.55068000 | 4.30377700  | C            | 1.02604700  | 3.22316800  | -2.21892900 |
| C | -2.26289900 | -0.69247700 | 0.50968200  | C            | -0.33699600 | 5.63013500  | -1.89603500 |
| C | -1.37658500 | -1.46403200 | 2.63877200  | H            | -1.50330200 | 4.60971900  | -0.41282100 |
| C | -1.17990100 | -1.16129400 | 1.26043400  | C            | 1.38093500  | 4.33300600  | -2.98520200 |
| H | -0.54568900 | -1.83492200 | 3.22407000  | H            | 1.57390500  | 2.29247100  | -2.32933600 |
| P | 0.55858400  | -1.30489800 | 0.55900400  | C            | 0.70055000  | 5.54211800  | -2.82458100 |
| C | 1.45265700  | -2.14905900 | 1.95795600  | H            | -0.86789900 | 6.56860100  | -1.75798400 |
| C | 1.58172600  | -3.53971800 | 2.08057100  | H            | 2.19856600  | 4.25505900  | -3.69674700 |
| C | 2.03330700  | -1.32926300 | 2.94144500  | H            | 0.98279000  | 6.41081400  | -3.41359400 |
| C | 2.26051600  | -4.09834300 | 3.16699200  | C            | 4.22864200  | -1.28660100 | 0.28198000  |
| H | 1.16263900  | -4.19566900 | 1.32568700  | C            | 5.08132000  | -2.16828400 | -0.39666600 |
| C | 2.70102000  | -1.88888800 | 4.03128100  | C            | 5.27865800  | -2.01157900 | -1.77242900 |
| H | 1.99234100  | -0.24969200 | 2.82563400  | C            | 4.63973300  | -0.95467900 | -2.44396800 |
| C | 2.81562200  | -3.27648300 | 4.14858600  | C            | 3.80905500  | -0.09278200 | -1.74072600 |
| H | 2.35484600  | -5.17880400 | 3.24217000  | C            | 3.55469000  | -0.22289300 | -0.34705500 |
| H | 3.14483800  | -1.23764500 | 4.77982700  | H            | 4.10935400  | -1.42702300 | 1.35184600  |
| H | 3.34194400  | -3.71301000 | 4.99369500  | H            | 5.57293300  | -2.96567300 | 0.15141500  |
| C | 0.37844600  | -2.65527400 | -0.69549600 | H            | 4.82273600  | -0.83244800 | -3.50826300 |
| C | -0.50753200 | -3.73073700 | -0.51658500 | H            | 3.35985200  | 0.73435500  | -2.28582400 |
| C | 1.18360900  | -2.62600400 | -1.84259100 | B            | 4.06653200  | 1.56737400  | 0.64402100  |
| C | -0.57816100 | -4.75762000 | -1.45837200 | O            | 4.10095600  | 1.27526600  | 2.02554000  |
| H | -1.14810700 | -3.76490700 | 0.36015200  | H            | 5.02133100  | 1.21628900  | 2.31549200  |
| C | 1.11044100  | -3.65385100 | -2.78550100 | O            | 5.26135800  | 1.89910800  | -0.02202700 |
| H | 1.86911300  | -1.79950000 | -1.99297400 | H            | 5.87948400  | 1.15580400  | -0.02572100 |
| C | 0.23201800  | -4.72119300 | -2.59558600 | O            | 6.07592200  | -2.80999600 | -2.54309200 |
| H | -1.27141300 | -5.58111400 | -1.30791700 | C            | 6.72491300  | -3.90475300 | -1.92125200 |
| H | 1.74248300  | -3.61559000 | -3.66882500 | H            | 7.28030300  | -4.41390000 | -2.71199100 |
| H | 0.17362600  | -5.51903000 | -3.33157700 | H            | 7.42659700  | -3.57322900 | -1.14321000 |
| C | -2.15434900 | 0.27077800  | -3.71049900 | H            | 6.00389400  | -4.60378500 | -1.47601000 |
| C | -2.82736300 | -0.90221100 | -3.29181100 |              |             |             |             |
| C | -2.83273100 | -1.23289500 | -1.89759900 | <b>28-L2</b> |             |             |             |
| C | -2.15949900 | -0.37493800 | -0.95695900 | Rh           | -1.62670400 | 0.37311000  | -0.18553600 |
| C | -1.48983800 | 0.76355800  | -1.41370700 | O            | -3.06827600 | 2.24737900  | -0.01592700 |
| C | -1.50649200 | 1.07194300  | -2.80340900 | C            | -3.36232500 | 2.92137800  | -1.24262300 |
| H | -2.15865000 | 0.53424000  | -4.76577400 | H            | -3.79870300 | 2.23382800  | -1.97476800 |
| H | -1.00082600 | 1.96226900  | -3.15623600 | H            | -4.05506300 | 3.75110200  | -1.06595100 |
| C | -3.50289200 | -1.74147000 | -4.21864400 | H            | -2.42046400 | 3.31301600  | -1.63132100 |
| H | -3.48556000 | -1.46948900 | -5.27150100 | C            | 4.15855900  | -0.53076700 | 4.08023500  |
| C | -3.52375800 | -2.41457100 | -1.50195900 | C            | 3.31195400  | 0.03128400  | 3.08680300  |
| H | -3.53899500 | -2.69061100 | -0.45451600 | C            | 3.17489900  | -0.61800700 | 1.81731400  |
| C | -4.16466700 | -2.87094700 | -3.79731500 | C            | 3.90788400  | -1.82296200 | 1.61131500  |
| C | -4.17036800 | -3.20810300 | -2.42274500 | C            | 4.72186900  | -2.34398500 | 2.59239200  |
| H | -4.68011300 | -3.50508300 | -4.51356500 | C            | 4.85309700  | -1.69375700 | 3.84242800  |
| H | -4.68960700 | -4.10331600 | -2.09095300 | H            | 4.24640800  | -0.01846800 | 5.03559300  |
| P | -0.39658500 | 1.76996500  | -0.28501700 | H            | 3.82002500  | -2.33864900 | 0.66251900  |
| C | -1.51520900 | 2.42041100  | 1.03618600  | H            | 5.26863500  | -3.26436900 | 2.40460400  |
| C | -0.98879800 | 2.53933200  | 2.33052600  | H            | 5.49993900  | -2.11418700 | 4.60779200  |
| C | -2.83273900 | 2.84234400  | 0.79796100  | C            | 2.60407400  | 1.23593100  | 3.31406200  |
| C | -1.75794600 | 3.07947100  | 3.36320000  | H            | 2.71821300  | 1.74419100  | 4.26892800  |

|   |             |             |             |
|---|-------------|-------------|-------------|
| C | 2.31991100  | -0.04587200 | 0.80729900  |
| C | 1.78690100  | 1.76387300  | 2.34615900  |
| C | 1.62144200  | 1.13380600  | 1.08013100  |
| H | 1.25976600  | 2.68729800  | 2.55175700  |
| P | 0.30662300  | 1.77766800  | -0.07832500 |
| C | -0.06351900 | 3.47717500  | 0.57894000  |
| C | 0.42351200  | 4.66643100  | 0.01473200  |
| C | -0.93925500 | 3.56720900  | 1.67596800  |
| C | 0.06064900  | 5.90792800  | 0.54412300  |
| H | 1.08422600  | 4.63322600  | -0.84428000 |
| C | -1.29113600 | 4.80631300  | 2.21067600  |
| H | -1.36526000 | 2.66453500  | 2.10037800  |
| C | -0.79176800 | 5.98237500  | 1.64606300  |
| H | 0.44844100  | 6.81698900  | 0.09111800  |
| H | -1.97112000 | 4.84801700  | 3.05727200  |
| H | -1.07216900 | 6.94914400  | 2.05647400  |
| C | 1.19229500  | 2.14212000  | -1.66009000 |
| C | 2.46862500  | 2.72333300  | -1.71941500 |
| C | 0.52282600  | 1.85769500  | -2.85951000 |
| C | 3.05484200  | 3.02483400  | -2.94915800 |
| H | 3.00865100  | 2.93672100  | -0.80116400 |
| C | 1.10911000  | 2.15880000  | -4.09066500 |
| H | -0.45352300 | 1.38021700  | -2.81203900 |
| C | 2.37457800  | 2.74598500  | -4.13706300 |
| H | 4.04668900  | 3.46779400  | -2.97988400 |
| H | 0.58021500  | 1.92861400  | -5.01205900 |
| H | 2.83405200  | 2.97833900  | -5.09429500 |
| C | 2.48839100  | -2.01235100 | -3.04957100 |
| C | 3.58526900  | -1.23279500 | -2.61375700 |
| C | 3.49424500  | -0.57313500 | -1.34638900 |
| C | 2.29944600  | -0.70687300 | -0.54550100 |
| C | 1.22290800  | -1.46222800 | -1.02616000 |
| C | 1.35357800  | -2.11587900 | -2.28640100 |
| H | 2.55422600  | -2.53381600 | -4.00192200 |
| H | 0.53855000  | -2.72448500 | -2.65461600 |
| C | 4.76188500  | -1.10288700 | -3.39955400 |
| H | 4.80410800  | -1.61806800 | -4.35644600 |
| C | 4.61317100  | 0.20852500  | -0.93366800 |
| H | 4.57423500  | 0.72972400  | 0.01499800  |
| C | 5.82287800  | -0.34408700 | -2.96399300 |
| C | 5.74051000  | 0.31977000  | -1.71726600 |
| H | 6.71933700  | -0.25106800 | -3.57115700 |
| H | 6.57572700  | 0.92424600  | -1.37320000 |
| P | -0.45594500 | -1.52692700 | -0.17790300 |
| C | -0.06977600 | -2.16255600 | 1.51748300  |
| C | -0.71357700 | -1.56973800 | 2.61367000  |
| C | 0.81923400  | -3.22456700 | 1.74807900  |
| C | -0.48638300 | -2.03787700 | 3.90938200  |
| H | -1.38027700 | -0.72972800 | 2.43328100  |
| C | 1.04226200  | -3.69563300 | 3.04249000  |
| H | 1.34526100  | -3.68194800 | 0.91456500  |
| C | 0.38796500  | -3.10420900 | 4.12550100  |
| H | -0.98974300 | -1.56581700 | 4.74916400  |
| H | 1.73663700  | -4.51535100 | 3.20616800  |
| H | 0.56653700  | -3.46879600 | 5.13378000  |
| C | -1.26773700 | -2.98472600 | -1.00849300 |
| C | -1.36337700 | -4.26288500 | -0.44287400 |
| C | -1.85664200 | -2.76924700 | -2.26702600 |

|   |             |             |             |
|---|-------------|-------------|-------------|
| C | -2.00863000 | -5.29980200 | -1.12398500 |
| H | -0.95025600 | -4.45989100 | 0.53931400  |
| C | -2.48341000 | -3.80620300 | -2.95481000 |
| H | -1.82988900 | -1.77373800 | -2.69959800 |
| C | -2.56229600 | -5.07907800 | -2.38364200 |
| H | -2.07774400 | -6.28102000 | -0.66124800 |
| H | -2.92626800 | -3.61587400 | -3.92906800 |
| H | -3.06252300 | -5.88646400 | -2.91209700 |
| C | -4.22128700 | -0.51031000 | -1.44501300 |
| C | -5.54254700 | -0.98410800 | -1.53524500 |
| C | -6.10611000 | -1.65894700 | -0.44653000 |
| C | -5.33477100 | -1.84796500 | 0.70651700  |
| C | -4.02994800 | -1.35986800 | 0.77055400  |
| C | -3.42173200 | -0.65642700 | -0.29399900 |
| H | -3.80996500 | -0.01861100 | -2.32648800 |
| H | -6.10015800 | -0.84474700 | -2.45671700 |
| H | -5.77889200 | -2.38290400 | 1.54227100  |
| H | -3.47252800 | -1.53542300 | 1.68815200  |
| B | -4.10539800 | 1.97752300  | 0.87964400  |
| O | -5.41630500 | 1.84434300  | 0.50984800  |
| H | -5.50919100 | 1.40394500  | -0.35125700 |
| O | -3.76417500 | 1.96051000  | 2.20514300  |
| H | -4.51923200 | 1.63946100  | 2.72004100  |
| O | -7.37997000 | -2.16992600 | -0.41227100 |
| C | -8.18719900 | -2.01341200 | -1.56190400 |
| H | -7.74840800 | -2.50833400 | -2.43997300 |
| H | -9.14471600 | -2.48376800 | -1.32708100 |
| H | -8.35651900 | -0.95366500 | -1.80121900 |

**29-L2**

|    |             |             |             |
|----|-------------|-------------|-------------|
| Rh | -1.74012200 | 0.89799000  | -0.24492600 |
| C  | 4.27468900  | -1.68620200 | -3.28236800 |
| C  | 3.05591500  | -1.60386500 | -2.55666900 |
| C  | 3.04268400  | -1.03430100 | -1.24236000 |
| C  | 4.28108500  | -0.55205600 | -0.72526700 |
| C  | 5.44721400  | -0.64255200 | -1.45243600 |
| C  | 5.45082000  | -1.21920300 | -2.74447400 |
| H  | 4.25591800  | -2.12625900 | -4.27670100 |
| H  | 4.30472300  | -0.10423600 | 0.26052200  |
| H  | 6.37445100  | -0.26582300 | -1.02876400 |
| H  | 6.37835900  | -1.28731500 | -3.30648700 |
| C  | 1.83957100  | -2.07644200 | -3.10261500 |
| H  | 1.84059600  | -2.51416900 | -4.09830200 |
| C  | 1.80709100  | -0.96207800 | -0.49791600 |
| C  | 0.66975300  | -1.98514100 | -2.39281200 |
| C  | 0.62108100  | -1.43062400 | -1.07990600 |
| H  | -0.24239600 | -2.35027100 | -2.84662800 |
| P  | -1.08174200 | -1.20478200 | -0.32354700 |
| C  | -2.14502000 | -2.31007500 | -1.38069700 |
| C  | -2.32249500 | -3.68066400 | -1.13922500 |
| C  | -2.79968900 | -1.73107000 | -2.48040800 |
| C  | -3.12475800 | -4.45325600 | -1.98253300 |
| H  | -1.84673100 | -4.15213000 | -0.28625800 |
| C  | -3.58995600 | -2.50558300 | -3.32980100 |
| H  | -2.69701100 | -0.66308500 | -2.64998300 |
| C  | -3.75589700 | -3.87009600 | -3.08210800 |
| H  | -3.25721000 | -5.51210300 | -1.77516900 |
| H  | -4.08840600 | -2.03868600 | -4.17523500 |

|   |             |             |             |              |             |             |             |
|---|-------------|-------------|-------------|--------------|-------------|-------------|-------------|
| H | -4.38079700 | -4.47260400 | -3.73633300 | H            | -5.93140700 | 3.25375200  | -0.27877500 |
| C | -1.02516100 | -2.11424000 | 1.28566300  | H            | -6.74086900 | -0.90576800 | 0.45955400  |
| C | -0.25785100 | -3.27391100 | 1.47669300  | H            | -4.36838500 | -1.43094800 | 0.23431400  |
| C | -1.82816300 | -1.65139700 | 2.33914200  | O            | -7.80355200 | 1.61245800  | 0.20674600  |
| C | -0.29817300 | -3.95993800 | 2.69152300  | C            | -8.77653800 | 0.62215900  | 0.47431800  |
| H | 0.38216200  | -3.63831600 | 0.67852800  | H            | -8.59910800 | 0.12495200  | 1.43845100  |
| C | -1.86997800 | -2.34041700 | 3.55248900  | H            | -9.73638800 | 1.14254800  | 0.51121700  |
| H | -2.41460900 | -0.74849000 | 2.19468900  | H            | -8.81043800 | -0.14088600 | -0.31608800 |
| C | -1.10641200 | -3.49559500 | 3.73100700  |              |             |             |             |
| H | 0.31016200  | -4.84996400 | 2.82801100  | <b>33-L2</b> |             |             |             |
| H | -2.49687700 | -1.97044200 | 4.35961500  | C            | 6.42020000  | 0.79520700  | -0.08073500 |
| H | -1.13502900 | -4.02851000 | 4.67790500  | C            | 6.73145500  | -0.02337800 | 0.93451700  |
| C | 2.25633300  | 0.66071700  | 3.49796300  | C            | 6.78467200  | -1.49285000 | 0.75914300  |
| C | 2.71091900  | -0.65328600 | 3.23127000  | C            | 6.52557800  | -2.00327000 | -0.60765700 |
| C | 2.53582700  | -1.19221700 | 1.91458000  | C            | 6.21350100  | -1.18111200 | -1.61965400 |
| C | 1.88972600  | -0.40146800 | 0.89887200  | C            | 6.12923000  | 0.32287600  | -1.48819900 |
| C | 1.44423200  | 0.88706600  | 1.20882300  | H            | 6.34653600  | 1.87120700  | 0.06848600  |
| C | 1.64484800  | 1.40393700  | 2.51913100  | H            | 6.93025800  | 0.34593700  | 1.93693300  |
| H | 2.40329700  | 1.07868600  | 4.49125000  | H            | 6.57750700  | -3.08184200 | -0.73089900 |
| H | 1.30717900  | 2.40738200  | 2.75001600  | H            | 5.99381100  | -1.57272500 | -2.61194900 |
| C | 3.34799900  | -1.43378700 | 4.23379100  | O            | 7.00653900  | -2.25149800 | 1.70063300  |
| H | 3.46752100  | -1.00431300 | 5.22575300  | O            | 4.83765600  | 0.79750900  | -1.91118300 |
| C | 3.02729600  | -2.50770600 | 1.66954500  | C            | 7.11794500  | 0.98276300  | -2.46781300 |
| H | 2.91470900  | -2.93685900 | 0.68092400  | H            | 6.88277500  | 0.67333900  | -3.49115200 |
| C | 3.80745400  | -2.70042400 | 3.95923300  | H            | 7.02094700  | 2.07131300  | -2.40719200 |
| C | 3.64401400  | -3.23861900 | 2.66022900  | H            | 8.14898000  | 0.70008100  | -2.23434200 |
| H | 4.29609800  | -3.28755000 | 4.73208700  | C            | 3.72350200  | 0.25337100  | -1.17809500 |
| H | 4.01023300  | -4.23846100 | 2.44228100  | H            | 3.57359700  | -0.79943000 | -1.46007000 |
| P | 0.40940200  | 1.84969500  | -0.00207200 | H            | 3.94551000  | 0.25949000  | -0.10120500 |
| C | 1.55381300  | 2.26709600  | -1.38881600 | C            | 2.49951700  | 1.03603300  | -1.42030700 |
| C | 1.02423300  | 2.25480900  | -2.68725300 | C            | 1.93410700  | 2.03895500  | -2.00029300 |
| C | 2.90052800  | 2.61972900  | -1.20678500 | Rh           | 0.60261500  | 1.19866400  | -0.65135500 |
| C | 1.81934700  | 2.60079200  | -3.78150900 | C            | 1.01576600  | 2.76783700  | 0.56325800  |
| H | -0.01267100 | 1.95990600  | -2.83008700 | C            | 0.41309500  | 4.02803600  | 0.45643000  |
| C | 3.69511300  | 2.96487000  | -2.30050600 | C            | 2.05113000  | 2.63250200  | 1.50595700  |
| H | 3.33011600  | 2.62045100  | -0.20844800 | C            | 0.77804800  | 5.09915000  | 1.28664200  |
| C | 3.15484400  | 2.95813100  | -3.58916000 | H            | -0.36085400 | 4.20468100  | -0.28362500 |
| H | 1.39703800  | 2.58508500  | -4.78282200 | C            | 2.42435700  | 3.68725500  | 2.33771300  |
| H | 4.73737300  | 3.23255500  | -2.14792500 | H            | 2.58049900  | 1.69102500  | 1.60033000  |
| H | 3.77626400  | 3.22423000  | -4.44024200 | C            | 1.78574900  | 4.92961500  | 2.23933300  |
| C | 0.12585800  | 3.48611500  | 0.82824700  | H            | 0.26885800  | 6.05032500  | 1.17008800  |
| C | 0.81576500  | 4.66699800  | 0.51606600  | H            | 3.21942500  | 3.56612900  | 3.06855800  |
| C | -0.91336000 | 3.54669200  | 1.77676300  | C            | -2.88558800 | -3.46120200 | -3.92871500 |
| C | 0.48167600  | 5.87145400  | 1.14052100  | C            | -2.71461900 | -2.29846200 | -3.13042200 |
| H | 1.61057200  | 4.65377200  | -0.22186800 | C            | -2.58450400 | -2.42053900 | -1.70892500 |
| C | -1.24067000 | 4.74839400  | 2.40500800  | C            | -2.61306800 | -3.73458900 | -1.15722700 |
| H | -1.46433400 | 2.63976500  | 2.02041100  | C            | -2.77004000 | -4.84472200 | -1.95688300 |
| C | -0.54293700 | 5.91605000  | 2.08701600  | C            | -2.91594500 | -4.71200600 | -3.35774500 |
| H | 1.02469000  | 6.77718300  | 0.88279200  | H            | -2.98824900 | -3.33986800 | -5.00460100 |
| H | -2.04482600 | 4.77240200  | 3.13565700  | H            | -2.49578700 | -3.86245400 | -0.08830200 |
| H | -0.80058500 | 6.85512600  | 2.56961100  | H            | -2.78001000 | -5.83343600 | -1.50619100 |
| C | -4.21770300 | 1.91793500  | -0.28130000 | H            | -3.04534900 | -5.59594700 | -3.97641500 |
| C | -5.56857700 | 2.23615200  | -0.16271600 | C            | -2.67331400 | -1.00644400 | -3.70801100 |
| C | -6.49225200 | 1.21617200  | 0.10685000  | H            | -2.78723100 | -0.90352100 | -4.78475800 |
| C | -6.04303800 | -0.10103000 | 0.25135300  | C            | -2.42715700 | -1.23974100 | -0.89091800 |
| C | -4.67753500 | -0.39419000 | 0.12502100  | C            | -2.48616400 | 0.10384400  | -2.92567200 |
| C | -3.72985100 | 0.60298300  | -0.13519100 | C            | -2.35544200 | 0.01723600  | -1.50776700 |
| H | -3.51990800 | 2.73997500  | -0.49580800 | H            | -2.44592800 | 1.07710400  | -3.39966000 |

|   |             |             |             |                 |             |             |             |
|---|-------------|-------------|-------------|-----------------|-------------|-------------|-------------|
| P | -1.78167100 | 1.56770600  | -0.64189000 | C               | 3.35391100  | -0.67430200 | 4.25134900  |
| C | -2.40828700 | 2.95088600  | -1.72945100 | H               | 4.57229500  | -2.03571300 | 3.10056200  |
| C | -3.65402900 | 3.58009500  | -1.58007800 | H               | 1.93434800  | 0.69350900  | 5.13194900  |
| C | -1.55029700 | 3.40650000  | -2.74443200 | H               | 4.07404900  | -0.57995200 | 5.05969300  |
| C | -4.03490000 | 4.61885400  | -2.43232400 | O               | 2.22219700  | 5.90260400  | 3.10506200  |
| H | -4.32998900 | 3.27534300  | -0.78969700 | C               | 1.62034500  | 7.17913400  | 3.01963900  |
| C | -1.93401300 | 4.43825800  | -3.60231800 | H               | 0.54152400  | 7.13694500  | 3.22689200  |
| H | -0.57167100 | 2.94756300  | -2.84329900 | H               | 2.10683600  | 7.79570700  | 3.77896200  |
| C | -3.18023100 | 5.04816800  | -3.44884200 | H               | 1.77248600  | 7.63700400  | 2.03196400  |
| H | -5.00272600 | 5.09485200  | -2.29650800 | C               | 2.14315600  | 3.21635800  | -2.88147500 |
| H | -1.25326600 | 4.77223600  | -4.38118900 | H               | 3.19461000  | 3.29648400  | -3.18460300 |
| H | -3.47891300 | 5.85823900  | -4.10907100 | H               | 1.53269700  | 3.15798000  | -3.79240200 |
| C | -2.83854600 | 1.75839500  | 0.86396500  | H               | 1.86083900  | 4.13939300  | -2.36058400 |
| C | -4.21143900 | 1.46230200  | 0.87178000  |                 |             |             |             |
| C | -2.25359700 | 2.27457500  | 2.03074400  | <b>34-ts-L2</b> |             |             |             |
| C | -4.98236100 | 1.68365800  | 2.01329100  | C               | 6.37809200  | 0.24411800  | 2.03610900  |
| H | -4.67972600 | 1.04165600  | -0.01288200 | C               | 7.31265500  | -0.70025900 | 1.86081100  |
| C | -3.02741900 | 2.49974400  | 3.17171700  | C               | 8.24071500  | -0.67472900 | 0.70456600  |
| H | -1.19415900 | 2.50776900  | 2.04048000  | C               | 8.03134300  | 0.41391400  | -0.27944100 |
| C | -4.39186200 | 2.20723200  | 3.16548900  | C               | 7.09192500  | 1.35349200  | -0.10167200 |
| H | -6.04018900 | 1.43550700  | 2.00409800  | C               | 6.20791500  | 1.43687500  | 1.12265100  |
| H | -2.55952100 | 2.90383800  | 4.06566000  | H               | 5.69615400  | 0.21067000  | 2.88473800  |
| H | -4.99223200 | 2.37992900  | 4.05494900  | H               | 7.43466300  | -1.53170300 | 2.54984100  |
| C | -2.64022300 | -2.10678300 | 3.35397900  | H               | 8.67700100  | 0.39665300  | -1.15336100 |
| C | -3.82281200 | -2.11640600 | 2.57595100  | H               | 6.93614100  | 2.14118100  | -0.83747700 |
| C | -3.73329000 | -1.79733900 | 1.18247400  | O               | 9.12291800  | -1.51577700 | 0.56403800  |
| C | -2.45725700 | -1.45115200 | 0.60357000  | O               | 4.83134600  | 1.61205300  | 0.75359700  |
| C | -1.31935500 | -1.42227800 | 1.41582100  | C               | 6.55042000  | 2.72383300  | 1.90401500  |
| C | -1.43503600 | -1.76957100 | 2.79228100  | H               | 6.39126200  | 3.59533200  | 1.26101300  |
| H | -2.69729800 | -2.37423500 | 4.40671200  | H               | 5.88919300  | 2.81207100  | 2.77188900  |
| H | -0.54773800 | -1.77595400 | 3.41310500  | H               | 7.59051700  | 2.71033100  | 2.24203600  |
| C | -5.08163500 | -2.44434900 | 3.14758600  | C               | 4.24522300  | 0.52961100  | 0.01446300  |
| H | -5.12176300 | -2.68402300 | 4.20761400  | H               | 4.87390900  | 0.27857100  | -0.85204900 |
| C | -4.93935100 | -1.82669700 | 0.42291400  | H               | 4.18156300  | -0.37172700 | 0.63823600  |
| H | -4.90463700 | -1.58992400 | -0.63387600 | C               | 2.89348900  | 0.97238100  | -0.42246100 |
| C | -6.22437900 | -2.45881100 | 2.38231000  | C               | 2.17175100  | 2.01897800  | -0.62176700 |
| C | -6.14693700 | -2.14440000 | 1.00467500  | Rh              | 0.80510500  | 0.44957300  | -0.51373100 |
| H | -7.18234400 | -2.71153000 | 2.82864800  | C               | 2.26187200  | -0.72356000 | -1.52387700 |
| H | -7.04884100 | -2.15658800 | 0.39835200  | C               | 2.78656200  | -1.97210700 | -1.13089500 |
| P | 0.32957700  | -0.90065000 | 0.70932200  | C               | 2.38048600  | -0.39224800 | -2.88485900 |
| C | 0.79696000  | -2.44143200 | -0.21590400 | C               | 3.32140200  | -2.86474200 | -2.05471300 |
| C | 1.17445900  | -2.35709300 | -1.56263000 | H               | 2.76496600  | -2.26653700 | -0.08814100 |
| C | 0.75809200  | -3.70640600 | 0.39595200  | C               | 2.89952000  | -1.28462700 | -3.83085000 |
| C | 1.51386400  | -3.50682500 | -2.28157900 | H               | 2.06886800  | 0.59141800  | -3.22133700 |
| H | 1.20083900  | -1.38702700 | -2.05161600 | C               | 3.37000400  | -2.53545500 | -3.41638200 |
| C | 1.10462700  | -4.85248700 | -0.31818800 | H               | 3.70345400  | -3.83217400 | -1.74112300 |
| H | 0.46009500  | -3.79458200 | 1.43712500  | H               | 2.95110000  | -0.98304200 | -4.87179700 |
| C | 1.48298400  | -4.75471900 | -1.66043200 | C               | -4.64625300 | 0.55369900  | 4.34288200  |
| H | 1.79888100  | -3.42296800 | -3.32695700 | C               | -3.67835800 | 0.07347100  | 3.41990400  |
| H | 1.07638000  | -5.82253700 | 0.17140700  | C               | -3.90869600 | 0.20129700  | 2.01211400  |
| H | 1.74835700  | -5.64917700 | -2.21789700 | C               | -5.12469000 | 0.82107500  | 1.59948900  |
| C | 1.48388200  | -0.91979100 | 2.15496900  | C               | -6.04612700 | 1.27543100  | 2.51674400  |
| C | 2.69899000  | -1.62419600 | 2.12351300  | C               | -5.80979300 | 1.14175000  | 3.90559300  |
| C | 1.23615000  | -0.06796400 | 3.24729600  | H               | -4.44626700 | 0.44378900  | 5.40622200  |
| C | 3.63000300  | -1.49722900 | 3.15857100  | H               | -5.32787400 | 0.93545500  | 0.54168800  |
| H | 2.92818100  | -2.27563400 | 1.28709800  | H               | -6.96489100 | 1.74094500  | 2.16964600  |
| C | 2.15240900  | 0.03741600  | 4.29341300  | H               | -6.54567900 | 1.50282900  | 4.61901500  |
| H | 0.32549700  | 0.52319900  | 3.27678900  | C               | -2.48334000 | -0.54433000 | 3.85732400  |

|   |             |             |             |              |             |             |             |
|---|-------------|-------------|-------------|--------------|-------------|-------------|-------------|
| H | -2.30625200 | -0.65743600 | 4.92455500  | C            | -0.30144000 | 2.66139500  | -3.18278400 |
| C | -2.92589800 | -0.28793000 | 1.07569000  | C            | -1.23208300 | 5.27324400  | -2.94461200 |
| C | -1.55793400 | -1.00336500 | 2.95408600  | H            | -1.94889200 | 4.69180200  | -1.00789700 |
| C | -1.75043400 | -0.88249100 | 1.54728500  | C            | -0.11042300 | 3.56598400  | -4.22652800 |
| H | -0.65894100 | -1.47569900 | 3.32779400  | H            | 0.08216000  | 1.64848200  | -3.26468000 |
| P | -0.35346800 | -1.39459600 | 0.40283500  | C            | -0.57305700 | 4.87971000  | -4.10864100 |
| C | 0.78803900  | -2.29107300 | 1.57584900  | H            | -1.58916800 | 6.29444800  | -2.83857400 |
| C | 0.83640800  | -3.68416200 | 1.72346000  | H            | 0.40991900  | 3.24853800  | -5.12658600 |
| C | 1.69179000  | -1.50927300 | 2.31969500  | H            | -0.41467000 | 5.59031200  | -4.91558600 |
| C | 1.75501900  | -4.27901200 | 2.59399800  | O            | 3.90739400  | -3.48416500 | -4.24430900 |
| H | 0.16820300  | -4.31659000 | 1.14983400  | C            | 4.00413700  | -3.18578700 | -5.62447800 |
| C | 2.59769900  | -2.10208200 | 3.19890900  | H            | 4.45061200  | -4.06534400 | -6.09309600 |
| H | 1.68728100  | -0.43003500 | 2.18702200  | H            | 3.01726400  | -3.00035200 | -6.07106600 |
| C | 2.63421000  | -3.49250200 | 3.33771400  | H            | 4.64704400  | -2.31375200 | -5.80780700 |
| H | 1.78172100  | -5.36185300 | 2.68545000  | C            | 2.26675900  | 3.50012700  | -0.70602000 |
| H | 3.28143000  | -1.47816900 | 3.76927600  | H            | 3.28163600  | 3.83988300  | -0.46443400 |
| H | 3.34690500  | -3.95727700 | 4.01390100  | H            | 2.01196800  | 3.85359500  | -1.71310400 |
| C | -1.08950400 | -2.77794100 | -0.58314400 | H            | 1.56539900  | 3.98691800  | -0.01823600 |
| C | -1.98046000 | -3.71795200 | -0.03940000 |              |             |             |             |
| C | -0.70835700 | -2.90497700 | -1.92702100 | <b>35-L2</b> |             |             |             |
| C | -2.46871900 | -4.76726900 | -0.81827400 | C            | -7.80664200 | -0.55015700 | 0.39618300  |
| H | -2.29617600 | -3.62791900 | 0.99654700  | C            | -8.52034600 | -0.09768900 | 1.43704100  |
| C | -1.19895000 | -3.95525800 | -2.70613100 | C            | -8.64236000 | 1.35022400  | 1.72967300  |
| H | -0.02591300 | -2.17871200 | -2.35726000 | C            | -7.88544800 | 2.26394700  | 0.84181300  |
| C | -2.07683500 | -4.88862900 | -2.15369100 | C            | -7.16902000 | 1.80611300  | -0.19508500 |
| H | -3.16007800 | -5.48546100 | -0.38508100 | C            | -7.10432100 | 0.34916900  | -0.59479400 |
| H | -0.89333800 | -4.04144800 | -3.74548300 | H            | -7.71596500 | -1.61724300 | 0.19791600  |
| H | -2.45977400 | -5.70483700 | -2.76086400 | H            | -9.03765900 | -0.76587600 | 2.12052500  |
| C | -4.07690700 | 0.11350700  | -3.08043900 | H            | -7.93775300 | 3.32078200  | 1.09043900  |
| C | -4.69793100 | -0.87825900 | -2.28455000 | H            | -6.59446500 | 2.48120100  | -0.82749200 |
| C | -4.28602900 | -1.02126100 | -0.91978700 | O            | -9.31742100 | 1.76767700  | 2.66641500  |
| C | -3.25336900 | -0.16741100 | -0.38862000 | O            | -5.74428700 | -0.06168800 | -0.79609500 |
| C | -2.65071800 | 0.78794700  | -1.21404400 | C            | -7.75693800 | 0.17922500  | -1.98375400 |
| C | -3.08933700 | 0.91387600  | -2.56342800 | H            | -7.22429800 | 0.79652700  | -2.71404900 |
| H | -4.39614700 | 0.23949300  | -4.11254400 | H            | -7.68008800 | -0.86662800 | -2.29761600 |
| H | -2.63900900 | 1.66405700  | -3.20086100 | H            | -8.81034500 | 0.47335600  | -1.96090800 |
| C | -5.72237700 | -1.71414700 | -2.80517500 | C            | -4.89714100 | -0.05069700 | 0.37259200  |
| H | -6.01710900 | -1.58585900 | -3.84413500 | H            | -5.11278100 | 0.85252500  | 0.96175700  |
| C | -4.93704100 | -2.01831600 | -0.13640400 | H            | -5.12477700 | -0.91484000 | 1.00658100  |
| H | -4.64276100 | -2.15244900 | 0.89747700  | C            | -3.46116800 | -0.05959400 | -0.07980600 |
| C | -6.33015500 | -2.66230000 | -2.01610400 | C            | -2.57885700 | -1.08530200 | 0.03141200  |
| C | -5.92825600 | -2.81283700 | -0.66753100 | Rh           | -0.79422500 | -0.14886300 | -0.19642800 |
| H | -7.11446500 | -3.29509700 | -2.42259200 | C            | -2.96363900 | 1.18766900  | -0.74917300 |
| H | -6.40580500 | -3.56470100 | -0.04480600 | C            | -3.14306400 | 2.47640500  | -0.20371000 |
| P | -1.15415500 | 1.76459200  | -0.66668500 | C            | -2.37914100 | 1.11556200  | -2.03829200 |
| C | -1.71877800 | 2.76767900  | 0.77834700  | C            | -2.76476100 | 3.62966700  | -0.88425700 |
| C | -0.80084800 | 2.98548200  | 1.81640200  | H            | -3.57943900 | 2.57960500  | 0.78559400  |
| C | -2.99367800 | 3.34858800  | 0.86643800  | C            | -1.99808800 | 2.26767600  | -2.73085200 |
| C | -1.14415500 | 3.77990300  | 2.91217000  | H            | -2.33018700 | 0.15302200  | -2.53437300 |
| H | 0.17805000  | 2.51641900  | 1.75868900  | C            | -2.18237600 | 3.52905000  | -2.15890500 |
| C | -3.33695000 | 4.14057600  | 1.96267600  | H            | -2.90925800 | 4.59430300  | -0.41162500 |
| H | -3.72352100 | 3.17453200  | 0.08080200  | H            | -1.58115100 | 2.20604600  | -3.73174600 |
| C | -2.41156200 | 4.36002600  | 2.98589300  | C            | 4.95404700  | -1.26276300 | 4.16559000  |
| H | -0.42332700 | 3.93942900  | 3.70985500  | C            | 4.06196200  | -0.62573300 | 3.26120500  |
| H | -4.33016100 | 4.57732400  | 2.02243800  | C            | 4.02085900  | -1.04073400 | 1.89043400  |
| H | -2.68175700 | 4.97456700  | 3.84066400  | C            | 4.89448800  | -2.09523600 | 1.49447500  |
| C | -0.97720100 | 3.04139200  | -2.00951300 | C            | 5.75023700  | -2.69253000 | 2.39304900  |
| C | -1.43781300 | 4.36107700  | -1.90497400 | C            | 5.78495600  | -2.27460400 | 3.74481600  |

|   |             |             |             |                 |             |             |             |
|---|-------------|-------------|-------------|-----------------|-------------|-------------|-------------|
| H | 4.96659600  | -0.93000100 | 5.20091400  | H               | -0.06735600 | -2.88069300 | 4.56696700  |
| H | 4.88327400  | -2.43217000 | 0.46472800  | H               | 3.01158700  | -5.19809500 | 2.65334600  |
| H | 6.40596500  | -3.49301400 | 2.06055000  | H               | 1.69523600  | -4.63286200 | 4.68518300  |
| H | 6.46599800  | -2.75312500 | 4.44344700  | C               | -0.16175900 | -3.32705600 | -1.32210300 |
| C | 3.21283500  | 0.42663700  | 3.67947700  | C               | -0.05578600 | -4.69193500 | -1.01997800 |
| H | 3.25130500  | 0.75665000  | 4.71522100  | C               | -0.86475300 | -2.95543900 | -2.48209200 |
| C | 3.11650800  | -0.39395300 | 0.97373800  | C               | -0.62518500 | -5.65546800 | -1.85795600 |
| C | 2.35468300  | 1.03106100  | 2.79462200  | H               | 0.45454200  | -5.01610400 | -0.12054000 |
| C | 2.28256700  | 0.63039600  | 1.43063200  | C               | -1.42039700 | -3.91595900 | -3.32602700 |
| H | 1.72001500  | 1.83514500  | 3.14596200  | H               | -0.98514100 | -1.89963000 | -2.70732100 |
| P | 0.99010500  | 1.38602200  | 0.31027400  | C               | -1.30348100 | -5.27323000 | -3.01470700 |
| C | 0.21120400  | 2.68337000  | 1.39118000  | H               | -0.53911600 | -6.70757500 | -1.59849100 |
| C | 0.46283500  | 4.05812200  | 1.27696100  | H               | -1.95722300 | -3.60360300 | -4.21802600 |
| C | -0.73428700 | 2.25375600  | 2.34058500  | H               | -1.74671400 | -6.02411700 | -3.66348100 |
| C | -0.20298200 | 4.97553700  | 2.09541400  | O               | -1.78009100 | 4.59569300  | -2.91309900 |
| H | 1.17852200  | 4.42080000  | 0.54737000  | C               | -1.93132500 | 5.89540700  | -2.36880500 |
| C | -1.38923100 | 3.16781700  | 3.16557500  | H               | -1.35870400 | 6.01300400  | -1.43923000 |
| H | -0.95745400 | 1.19245300  | 2.42204700  | H               | -1.54196500 | 6.58362100  | -3.12177900 |
| C | -1.12621200 | 4.53498700  | 3.04415000  | H               | -2.98584000 | 6.13343400  | -2.17324800 |
| H | 0.00766900  | 6.03721500  | 1.99196500  | C               | -2.94198600 | -2.47442700 | 0.47836600  |
| H | -2.10941600 | 2.81286900  | 3.89846400  | H               | -4.00780800 | -2.59385500 | 0.71475400  |
| H | -1.63849400 | 5.24950500  | 3.68325500  | H               | -2.70461000 | -3.19760300 | -0.31044100 |
| C | 2.01192200  | 2.39328700  | -0.86139400 | H               | -2.36617800 | -2.78279000 | 1.35931000  |
| C | 3.16508500  | 3.08984600  | -0.46329900 |                 |             |             |             |
| C | 1.59450300  | 2.48303400  | -2.19595100 | <b>36-ts-L2</b> |             |             |             |
| C | 3.87458800  | 3.86804100  | -1.37813600 | C               | -6.65951700 | 0.81482700  | -0.40007700 |
| H | 3.50881900  | 3.02386600  | 0.56550800  | C               | -7.08577600 | -0.21765800 | -1.14104700 |
| C | 2.30514200  | 3.26182600  | -3.11233900 | C               | -7.07257400 | -1.60555300 | -0.62306100 |
| H | 0.70733400  | 1.94249300  | -2.50986800 | C               | -6.58608800 | -1.78363500 | 0.76538800  |
| C | 3.44443300  | 3.95643500  | -2.70484100 | C               | -6.16351300 | -0.74765700 | 1.50363900  |
| H | 4.76600900  | 4.40099200  | -1.05725200 | C               | -6.17492100 | 0.68721200  | 1.02681100  |
| H | 1.96715700  | 3.32364800  | -4.14334700 | H               | -6.64359000 | 1.82661400  | -0.80248800 |
| H | 3.99981500  | 4.56055200  | -3.41762100 | H               | -7.43681500 | -0.09316100 | -2.16190600 |
| C | 3.45860200  | -1.66303800 | -3.15562800 | H               | -6.57365300 | -2.80435900 | 1.13835900  |
| C | 4.47526300  | -0.85806700 | -2.58924900 | H               | -5.78459200 | -0.89740000 | 2.51371500  |
| C | 4.32840200  | -0.42107700 | -1.23295100 | O               | -7.42632700 | -2.55852800 | -1.31272600 |
| C | 3.16510700  | -0.80983700 | -0.47271100 | O               | -4.87486200 | 1.28432700  | 1.16952800  |
| C | 2.17095900  | -1.58872800 | -1.07706800 | C               | -7.08063000 | 1.52626600  | 1.95014400  |
| C | 2.34788900  | -2.00719700 | -2.42792200 | H               | -6.71069900 | 1.46756500  | 2.97874200  |
| H | 3.56775800  | -2.00973100 | -4.18079700 | H               | -7.05365700 | 2.57414700  | 1.63469700  |
| H | 1.59040900  | -2.62265500 | -2.89588800 | H               | -8.11364500 | 1.16717200  | 1.91806700  |
| C | 5.62868000  | -0.48838200 | -3.33195300 | C               | -3.81593600 | 0.62977300  | 0.44385400  |
| H | 5.71651900  | -0.83598200 | -4.35869800 | H               | -3.61974000 | -0.35820000 | 0.88328000  |
| C | 5.36483200  | 0.39278100  | -0.68936300 | H               | -4.12697900 | 0.45390500  | -0.59603900 |
| H | 5.27790900  | 0.74901300  | 0.32975500  | C               | -2.59432700 | 1.45643400  | 0.46971700  |
| C | 6.61128000  | 0.29197400  | -2.76922100 | C               | -2.16977900 | 2.60983800  | 0.84919300  |
| C | 6.47056600  | 0.73820000  | -1.43393200 | Rh              | -0.55052700 | 1.30044900  | 0.14756700  |
| H | 7.49042700  | 0.56927500  | -3.34460300 | C               | -0.65285100 | 3.33211000  | -0.46469500 |
| H | 7.24286300  | 1.36148000  | -0.99101100 | C               | 0.10615400  | 4.42094100  | 0.00991500  |
| P | 0.52240500  | -1.95216700 | -0.26186300 | C               | -1.24059600 | 3.48025800  | -1.73251600 |
| C | 0.96498300  | -2.81716400 | 1.31421700  | C               | 0.32756300  | 5.55301300  | -0.76758400 |
| C | 0.24233300  | -2.49322100 | 2.47120400  | H               | 0.54224600  | 4.38734800  | 1.00167400  |
| C | 1.96887400  | -3.79561500 | 1.39697500  | C               | -1.01727400 | 4.60644200  | -2.53545800 |
| C | 0.50085900  | -3.14452400 | 3.67875700  | H               | -1.90024000 | 2.70408700  | -2.10831300 |
| H | -0.51442800 | -1.71548500 | 2.41066800  | C               | -0.22132000 | 5.65089900  | -2.05403800 |
| C | 2.22684900  | -4.44811700 | 2.60318700  | H               | 0.93095600  | 6.37737900  | -0.39759900 |
| H | 2.56038200  | -4.04208700 | 0.51952300  | H               | -1.48454700 | 4.66195600  | -3.51318600 |
| C | 1.49056400  | -4.12643100 | 3.74557800  | C               | 3.38798300  | -3.89829000 | 3.38659700  |

|   |             |             |             |
|---|-------------|-------------|-------------|
| C | 3.04930800  | -2.68867700 | 2.72214200  |
| C | 2.78883400  | -2.69523800 | 1.31388900  |
| C | 2.87909700  | -3.94641800 | 0.63596400  |
| C | 3.20926400  | -5.10359300 | 1.30586600  |
| C | 3.46973000  | -5.08483600 | 2.69659100  |
| H | 3.58250200  | -3.86417800 | 4.45607800  |
| H | 2.68366400  | -3.98765500 | -0.42865300 |
| H | 3.27072100  | -6.04119000 | 0.75961200  |
| H | 3.73179500  | -6.00459400 | 3.21257800  |
| C | 2.97090500  | -1.46032700 | 3.41896100  |
| H | 3.18124200  | -1.44291100 | 4.48602000  |
| C | 2.45067500  | -1.46489700 | 0.63892200  |
| C | 2.64031500  | -0.30062000 | 2.76432600  |
| C | 2.36586700  | -0.27251900 | 1.36601900  |
| H | 2.59513500  | 0.61874800  | 3.33284700  |
| P | 1.75737900  | 1.33421500  | 0.60670700  |
| C | 2.10197500  | 2.55234900  | 1.97710800  |
| C | 3.23198700  | 3.37914100  | 2.03376700  |
| C | 1.13500800  | 2.67223400  | 2.99235900  |
| C | 3.39582000  | 4.29392000  | 3.07863900  |
| H | 3.98623800  | 3.32563000  | 1.25676600  |
| C | 1.30482100  | 3.57459300  | 4.04215900  |
| H | 0.23910000  | 2.05872600  | 2.93834700  |
| C | 2.43783100  | 4.39220400  | 4.08728700  |
| H | 4.27577200  | 4.93188800  | 3.09830400  |
| H | 0.54772100  | 3.64660400  | 4.81895900  |
| H | 2.56730100  | 5.10380900  | 4.89853300  |
| C | 3.05999700  | 1.75079400  | -0.64115700 |
| C | 4.42573200  | 1.49363800  | -0.43865700 |
| C | 2.65876200  | 2.38721400  | -1.82512700 |
| C | 5.36940100  | 1.87230200  | -1.39389800 |
| H | 4.75277500  | 0.99137300  | 0.46767500  |
| C | 3.60449400  | 2.76542300  | -2.78071800 |
| H | 1.60457900  | 2.58560500  | -1.99141300 |
| C | 4.95982500  | 2.51080100  | -2.56696500 |
| H | 6.42246000  | 1.66218300  | -1.22586100 |
| H | 3.27888600  | 3.25912800  | -3.69252700 |
| H | 5.69496900  | 2.80339100  | -3.31227000 |
| C | 1.95615600  | -1.91989400 | -3.63884100 |
| C | 3.25890500  | -1.95108400 | -3.08685300 |
| C | 3.41164200  | -1.76181700 | -1.67502300 |
| C | 2.25073400  | -1.53785800 | -0.85117500 |
| C | 0.98277900  | -1.48817800 | -1.43966600 |
| C | 0.86058800  | -1.69362800 | -2.84354500 |
| H | 1.83007000  | -2.08356700 | -4.70668700 |
| H | -0.12138900 | -1.68146200 | -3.29879200 |
| C | 4.40340300  | -2.18347600 | -3.89668000 |
| H | 4.26137100  | -2.32460600 | -4.96562300 |
| C | 4.73237700  | -1.81607300 | -1.14177800 |
| H | 4.87778200  | -1.67460200 | -0.07764800 |
| C | 5.66186700  | -2.23153300 | -3.34438900 |
| C | 5.82291200  | -2.04393200 | -1.95083600 |
| H | 6.53072500  | -2.41236600 | -3.97146700 |
| H | 6.81781900  | -2.07979600 | -1.51489800 |
| P | -0.52990400 | -0.98313800 | -0.46590000 |
| C | -0.74415200 | -2.30269900 | 0.81016100  |
| C | -1.18578700 | -1.91835500 | 2.08487600  |
| C | -0.52228900 | -3.66446000 | 0.55034500  |

|   |             |             |             |
|---|-------------|-------------|-------------|
| C | -1.41132900 | -2.87596400 | 3.07607500  |
| H | -1.34012300 | -0.86243500 | 2.29317200  |
| C | -0.74706100 | -4.62039400 | 1.54129100  |
| H | -0.16752500 | -3.97805100 | -0.42751400 |
| C | -1.19381200 | -4.22775500 | 2.80541200  |
| H | -1.74955700 | -2.56382700 | 4.06079500  |
| H | -0.56553600 | -5.67053400 | 1.32899200  |
| H | -1.36429400 | -4.97349800 | 3.57748100  |
| C | -1.93000700 | -1.31640800 | -1.64559400 |
| C | -2.81000000 | -2.40202700 | -1.53265700 |
| C | -2.16612800 | -0.36872000 | -2.65867700 |
| C | -3.89717400 | -2.53510300 | -2.40314400 |
| H | -2.66735500 | -3.14139900 | -0.75260100 |
| C | -3.23305800 | -0.51548500 | -3.54382100 |
| H | -1.51268400 | 0.49562900  | -2.73714500 |
| C | -4.10888400 | -1.59760100 | -3.41330800 |
| H | -4.58787600 | -3.36447300 | -2.27960500 |
| H | -3.39118900 | 0.22499000  | -4.32391500 |
| H | -4.95610000 | -1.70358700 | -4.08523800 |
| O | 0.05970600  | 6.80315900  | -2.73972000 |
| C | -0.48269300 | 6.95320800  | -4.03807900 |
| H | -0.13445800 | 7.92257500  | -4.40124100 |
| H | -0.13216500 | 6.16536300  | -4.71943100 |
| H | -1.58150400 | 6.94694800  | -4.02385300 |
| C | -2.50456700 | 3.81859000  | 1.65013700  |
| H | -2.66277800 | 4.69891600  | 1.01772900  |
| H | -3.42620900 | 3.61688100  | 2.20886800  |
| H | -1.70931800 | 4.06702500  | 2.36227600  |

**37-L2**

|    |             |             |             |
|----|-------------|-------------|-------------|
| Rh | 0.66813900  | 1.34871700  | 0.09578300  |
| C  | -3.01239000 | -3.69569000 | -3.71704300 |
| C  | -2.71824100 | -2.50306000 | -3.00214500 |
| C  | -2.58577400 | -2.54227800 | -1.57602100 |
| C  | -2.75882400 | -3.80226400 | -0.93230500 |
| C  | -3.04540100 | -4.94128600 | -1.65126100 |
| C  | -3.17509600 | -4.89266000 | -3.05990300 |
| H  | -3.10708500 | -3.64052800 | -4.79904300 |
| H  | -2.66425100 | -3.86200000 | 0.14546400  |
| H  | -3.17421100 | -5.88709200 | -1.13151500 |
| H  | -3.40236900 | -5.79845500 | -3.61548600 |
| C  | -2.56325300 | -1.26305100 | -3.66679400 |
| H  | -2.67724300 | -1.22529700 | -4.74783600 |
| C  | -2.28779500 | -1.33299800 | -0.85181700 |
| C  | -2.27832400 | -0.11933000 | -2.96284300 |
| C  | -2.12832000 | -0.13103500 | -1.54772500 |
| H  | -2.16953800 | 0.81463900  | -3.50035300 |
| P  | -1.60528300 | 1.42716200  | -0.65897000 |
| C  | -1.61214800 | 2.70769300  | -2.00663200 |
| C  | -2.61180200 | 3.67737600  | -2.17114700 |
| C  | -0.50566000 | 2.73457900  | -2.87568200 |
| C  | -2.51423200 | 4.63765600  | -3.18275900 |
| H  | -3.47188800 | 3.68847600  | -1.51061000 |
| C  | -0.41491600 | 3.68465400  | -3.89268800 |
| H  | 0.29031800  | 2.00518700  | -2.74286000 |
| C  | -1.42053400 | 4.64202900  | -4.04911400 |
| H  | -3.30178700 | 5.37888200  | -3.29537600 |
| H  | 0.44427100  | 3.68045200  | -4.55870200 |



|   |             |             |             |              |             |             |             |
|---|-------------|-------------|-------------|--------------|-------------|-------------|-------------|
| H | -1.35052300 | 5.38548200  | -4.83899400 | H            | -0.19521700 | 6.42401900  | -0.92023300 |
| C | -3.11631600 | 1.84916300  | 0.32534000  | H            | -0.49686600 | 4.39325600  | 2.85661600  |
| C | -4.41992300 | 1.69552000  | -0.17543200 | H            | 1.42733000  | 2.94964400  | 2.22011500  |
| C | -2.94388500 | 2.35801300  | 1.61933500  | C            | 5.80396400  | -1.30290900 | 0.80480200  |
| C | -5.52302700 | 2.05841700  | 0.59729000  | C            | 6.23025900  | -2.25973400 | -0.03250100 |
| H | -4.57217600 | 1.28748800  | -1.17125300 | C            | 6.98167400  | -1.94079200 | -1.26793600 |
| C | -4.04854500 | 2.71830000  | 2.39446800  | C            | 7.19754000  | -0.50135000 | -1.54898400 |
| H | -1.93841600 | 2.46954000  | 2.01231800  | C            | 6.77325100  | 0.45234200  | -0.70783500 |
| C | -5.33866100 | 2.57190200  | 1.88397900  | C            | 6.08788000  | 0.16903600  | 0.61073300  |
| H | -6.52664200 | 1.93382600  | 0.19873000  | H            | 5.23754100  | -1.55186500 | 1.69986300  |
| H | -3.89936300 | 3.11121900  | 3.39670400  | H            | 6.03471700  | -3.31358600 | 0.14722500  |
| H | -6.19924100 | 2.84968000  | 2.48702100  | H            | 7.71474700  | -0.26978900 | -2.47655500 |
| C | -2.24790800 | -1.63819000 | 3.47314800  | H            | 6.93467400  | 1.50653400  | -0.92879000 |
| C | -3.47894700 | -1.73133500 | 2.78092200  | O            | 7.39286500  | -2.81603200 | -2.02491000 |
| C | -3.47615400 | -1.60226000 | 1.35414800  | O            | 4.89456000  | 0.95723100  | 0.74677000  |
| C | -2.23153300 | -1.40002000 | 0.65144200  | C            | 6.99183600  | 0.66018100  | 1.76254300  |
| C | -1.03613600 | -1.30790000 | 1.37415300  | H            | 7.16178300  | 1.73673700  | 1.65940300  |
| C | -1.07518600 | -1.42644600 | 2.79451900  | H            | 6.49074500  | 0.48100800  | 2.71895700  |
| H | -2.24143600 | -1.73631400 | 4.55637200  | H            | 7.95435100  | 0.14021400  | 1.75513400  |
| H | -0.15340600 | -1.35276600 | 3.35766500  | C            | 3.82346900  | 0.63976500  | -0.16618100 |
| C | -4.70162200 | -1.95032700 | 3.47038500  | H            | 4.19929900  | 0.70388800  | -1.20242100 |
| H | -4.67467500 | -2.04847900 | 4.55316100  | H            | 3.51307800  | -0.39721500 | -0.00524200 |
| C | -4.73246600 | -1.68285700 | 0.68552200  | C            | 2.68137100  | 1.60142200  | 0.04046400  |
| H | -4.76630000 | -1.57564000 | -0.39159300 | C            | 2.83957400  | 2.94053000  | -0.10920900 |
| C | -5.89273400 | -2.03392200 | 2.78797700  | O            | -1.51647800 | 6.25942700  | 1.47920100  |
| C | -5.90283300 | -1.89302900 | 1.38032300  | C            | -2.01248400 | 7.28613700  | 0.63773900  |
| H | -6.82303200 | -2.20262700 | 3.32363100  | H            | -2.40106800 | 6.88185100  | -0.30644100 |
| H | -6.84457200 | -1.94956400 | 0.84081700  | H            | -2.82692700 | 7.75953700  | 1.18984900  |
| P | 0.60202300  | -0.82323900 | 0.60677900  | H            | -1.24210300 | 8.03750800  | 0.41663000  |
| C | 0.90491500  | -2.07483100 | -0.72574000 | C            | 4.07730800  | 3.65938000  | -0.60567600 |
| C | 1.53974700  | -1.64473600 | -1.90024500 | H            | 4.50413200  | 4.29619500  | 0.18216400  |
| C | 0.56580500  | -3.43199800 | -0.60274900 | H            | 4.85305200  | 2.96042100  | -0.92305800 |
| C | 1.85406200  | -2.55113600 | -2.91422300 | H            | 3.84560100  | 4.32020200  | -1.45190200 |
| H | 1.77177400  | -0.58909200 | -2.01200900 |              |             |             |             |
| C | 0.87773100  | -4.33831100 | -1.61681900 | <b>38-L2</b> |             |             |             |
| H | 0.03768900  | -3.78258300 | 0.27911100  | C            | 3.53309000  | 4.21683400  | -2.08887600 |
| C | 1.52890500  | -3.90092400 | -2.77200700 | C            | 2.88689100  | 5.25573100  | -2.63734400 |
| H | 2.34972200  | -2.20133500 | -3.81594800 | C            | 2.52223800  | 6.45168600  | -1.84394600 |
| H | 0.60001900  | -5.38327800 | -1.50912400 | C            | 2.93057700  | 6.44491200  | -0.42119200 |
| H | 1.77213000  | -4.60753200 | -3.56100500 | C            | 3.57777200  | 5.40391300  | 0.12235900  |
| C | 1.81488900  | -1.33777300 | 1.93437700  | C            | 4.00479100  | 4.17852000  | -0.65312600 |
| C | 2.27056300  | -2.65323700 | 2.11693800  | H            | 3.77536100  | 3.33192900  | -2.67448700 |
| C | 2.25953700  | -0.34994500 | 2.82696400  | H            | 2.58225300  | 5.26565700  | -3.68090700 |
| C | 3.12669400  | -2.97246100 | 3.17352200  | H            | 2.65337800  | 7.32141100  | 0.15831700  |
| H | 1.97021100  | -3.43697700 | 1.43142600  | H            | 3.85182900  | 5.40438800  | 1.17625300  |
| C | 3.11036700  | -0.66774300 | 3.88723900  | O            | 1.89501400  | 7.38760200  | -2.33655300 |
| H | 1.93994200  | 0.67499200  | 2.66853400  | O            | 3.58580400  | 2.97026300  | -0.00589100 |
| C | 3.54372100  | -1.98286500 | 4.06702100  | C            | 5.54732700  | 4.09359600  | -0.64349300 |
| H | 3.46702300  | -3.99754000 | 3.29677300  | H            | 5.90277600  | 4.03265700  | 0.38992500  |
| H | 3.43931800  | 0.11500600  | 4.56568200  | H            | 5.86483000  | 3.18793200  | -1.17013700 |
| H | 4.20651700  | -2.23439600 | 4.89107000  | H            | 5.99332800  | 4.96749100  | -1.12784000 |
| C | 1.18849300  | 4.82447500  | -0.59680400 | C            | 2.16524100  | 2.82497200  | 0.24264300  |
| C | 0.13818000  | 5.65820500  | -0.22947600 | H            | 1.82660500  | 3.64576700  | 0.89690900  |
| C | -0.48550100 | 5.48951200  | 1.01850800  | H            | 1.62961300  | 2.93345000  | -0.70250000 |
| C | -0.03430800 | 4.48648200  | 1.87873000  | C            | 1.90163800  | 1.46985500  | 0.87037200  |
| C | 1.01770000  | 3.64771700  | 1.49891100  | C            | 2.60415100  | 1.13937800  | 1.99256200  |
| C | 1.65894400  | 3.79196700  | 0.24234000  | Rh           | 0.58835800  | 0.21876900  | -0.14823400 |
| H | 1.64832200  | 4.96979100  | -1.56998200 | C            | 2.64011600  | -0.22615400 | 2.58453200  |

|   |             |             |             |   |             |             |             |
|---|-------------|-------------|-------------|---|-------------|-------------|-------------|
| C | 3.78306600  | -0.66558000 | 3.28076300  | C | -2.08275700 | -1.21101800 | -2.52202000 |
| C | 1.59363600  | -1.16482800 | 2.46294900  | C | -2.98902000 | -2.16667300 | -3.00861000 |
| C | 3.90678500  | -1.95761800 | 3.79729900  | C | -1.97311600 | 0.01091800  | -3.19916200 |
| H | 4.62600400  | 0.00689500  | 3.40216300  | C | -3.76662700 | -1.90127100 | -4.13478700 |
| C | 1.69180800  | -2.44894200 | 2.98372900  | H | -3.08745600 | -3.12757500 | -2.51475700 |
| H | 0.66585900  | -0.87727900 | 1.96737000  | C | -2.74750300 | 0.27744900  | -4.33071700 |
| C | 2.85350200  | -2.86556900 | 3.64895700  | H | -1.27810700 | 0.75697100  | -2.82843000 |
| H | 4.82877600  | -2.24569100 | 4.28938600  | C | -3.64617600 | -0.67932700 | -4.80148900 |
| H | 0.86741000  | -3.14752900 | 2.89841400  | H | -4.46703900 | -2.65096100 | -4.49308900 |
| C | 6.35099700  | -1.80267700 | -0.32630200 | H | -2.64758900 | 1.23230800  | -4.84034100 |
| C | 6.76932200  | -2.27372400 | 0.85696200  | H | -4.24956100 | -0.47692000 | -5.68245200 |
| C | 6.31282900  | -3.58207600 | 1.37724600  | C | -4.98982400 | 1.88437800  | -1.40741800 |
| C | 5.37781300  | -4.34405300 | 0.51885200  | C | -5.57799200 | 0.59860800  | -1.36064900 |
| C | 4.96592900  | -3.87203600 | -0.66628400 | C | -4.89860500 | -0.43783500 | -0.64440100 |
| C | 5.43665300  | -2.56345100 | -1.26000300 | C | -3.64249800 | -0.15909900 | 0.00341100  |
| H | 6.66583700  | -0.82394600 | -0.68486400 | C | -3.07135000 | 1.11390600  | -0.09721700 |
| H | 7.43806600  | -1.71071500 | 1.50228900  | C | -3.78042400 | 2.12772100  | -0.80482900 |
| H | 5.02894700  | -5.29363100 | 0.91561000  | H | -5.50762500 | 2.68457100  | -1.93138700 |
| H | 4.25151600  | -4.42638000 | -1.27315100 | H | -3.36304300 | 3.12405200  | -0.86608100 |
| O | 6.67556700  | -4.00164300 | 2.47528900  | C | -6.81771400 | 0.32118300  | -1.99729600 |
| O | 4.31828100  | -1.74657500 | -1.64781100 | H | -7.31688800 | 1.12499900  | -2.53331600 |
| C | 6.17919000  | -2.84054600 | -2.58319800 | C | -5.50457400 | -1.72706100 | -0.61239100 |
| H | 5.51011300  | -3.35782600 | -3.27835100 | H | -5.00683100 | -2.53140500 | -0.08361400 |
| H | 6.48157100  | -1.89243400 | -3.03908700 | C | -7.37483900 | -0.93500500 | -1.94003700 |
| H | 7.06655600  | -3.45716500 | -2.41245200 | C | -6.70569200 | -1.96828800 | -1.24150600 |
| C | 3.42317300  | -1.40216600 | -0.57154800 | H | -8.32391900 | -1.13775100 | -2.42887200 |
| H | 2.96666100  | -2.31111300 | -0.15912000 | H | -7.14474300 | -2.96158700 | -1.20086900 |
| H | 3.96912300  | -0.91678000 | 0.24699900  | P | -1.37704200 | 1.51950800  | 0.61934100  |
| C | 2.38652700  | -0.49018200 | -1.07324800 | C | -1.76768000 | 1.68215200  | 2.42604200  |
| C | 1.86539200  | 0.29658300  | -1.90339200 | C | -0.75520800 | 1.46413900  | 3.37175600  |
| C | -3.71689200 | -2.95130000 | 4.14032900  | C | -3.03770200 | 2.08075600  | 2.87620000  |
| C | -3.10459200 | -2.62709500 | 2.90053200  | C | -1.00936700 | 1.63231600  | 4.73512800  |
| C | -3.64447700 | -1.57531800 | 2.09190600  | H | 0.23818800  | 1.18339400  | 3.04334300  |
| C | -4.79167700 | -0.88875000 | 2.58323300  | C | -3.28877500 | 2.25006900  | 4.23780500  |
| C | -5.36702400 | -1.22732600 | 3.78802500  | H | -3.83271800 | 2.26478400  | 2.16018500  |
| C | -4.82811500 | -2.26912200 | 4.57855000  | C | -2.27530500 | 2.02289900  | 5.17172600  |
| H | -3.28620100 | -3.75165500 | 4.73724600  | H | -0.21312100 | 1.45383300  | 5.45271300  |
| H | -5.22060100 | -0.08790700 | 1.99377500  | H | -4.27786300 | 2.55624800  | 4.56857700  |
| H | -6.24318800 | -0.68660700 | 4.13573100  | H | -2.47303600 | 2.15031300  | 6.23288100  |
| H | -5.29068400 | -2.52482400 | 5.52789200  | C | -1.18285600 | 3.30113200  | 0.11768400  |
| C | -1.95928200 | -3.32096500 | 2.43881100  | C | -1.33024600 | 4.37107800  | 1.01210300  |
| H | -1.53405900 | -4.10819900 | 3.05682300  | C | -0.85116100 | 3.59027300  | -1.21807700 |
| C | -3.02970400 | -1.25760800 | 0.82554200  | C | -1.15056400 | 5.68983100  | 0.58265700  |
| C | -1.38688300 | -3.00598700 | 1.23308100  | H | -1.58393100 | 4.18204400  | 2.04913000  |
| C | -1.92614500 | -1.99034200 | 0.38793200  | C | -0.69119800 | 4.90579300  | -1.64981800 |
| H | -0.50113900 | -3.54323000 | 0.91582900  | H | -0.71259000 | 2.77447000  | -1.92178900 |
| P | -0.91834100 | -1.53194600 | -1.10529900 | C | -0.83324500 | 5.96361900  | -0.74713600 |
| C | -0.24190200 | -3.16804100 | -1.69052600 | H | -1.26011700 | 6.50295300  | 1.29574600  |
| C | -0.90947300 | -4.39531300 | -1.52353100 | H | -0.43405600 | 5.11080000  | -2.68519300 |
| C | 0.95079400  | -3.15878800 | -2.43128800 | H | -0.67267700 | 6.98430100  | -1.08078600 |
| C | -0.39549600 | -5.57209700 | -2.06892000 | O | 2.85264800  | -4.15049600 | 4.11218300  |
| H | -1.83231300 | -4.44151200 | -0.95397200 | C | 4.02642500  | -4.62640400 | 4.76021500  |
| C | 1.46086200  | -4.33701600 | -2.98323500 | H | 3.81210300  | -5.66051400 | 5.03913900  |
| H | 1.49030300  | -2.22995000 | -2.57308600 | H | 4.89661000  | -4.59721400 | 4.09339400  |
| C | 0.79257500  | -5.54774900 | -2.80264300 | H | 4.24425100  | -4.04846100 | 5.66893000  |
| H | -0.92753100 | -6.50848600 | -1.92155200 | C | 3.47533000  | 2.15762500  | 2.72717800  |
| H | 2.38397200  | -4.29998000 | -3.55617900 | H | 4.52891500  | 2.11538800  | 2.42409600  |
| H | 1.19028000  | -6.46469400 | -3.22961200 | H | 3.13866300  | 3.18107800  | 2.54555300  |

|                 |             |             |             |   |             |             |             |
|-----------------|-------------|-------------|-------------|---|-------------|-------------|-------------|
| H               | 3.43459700  | 1.98216800  | 3.80911500  | C | 2.70941500  | 0.29981100  | -0.03950000 |
| C               | 1.73606400  | 1.00990000  | -3.18749100 | C | 2.88801500  | 1.54261000  | 0.16463300  |
| H               | 2.64653900  | 0.86961800  | -3.78616200 | C | -1.69978000 | -5.88096500 | 1.49466300  |
| H               | 0.88818900  | 0.63461800  | -3.77418500 | C | -1.36145700 | -4.70836700 | 0.76966300  |
| H               | 1.58891700  | 2.08616200  | -3.04326400 | C | -2.31058300 | -3.64207300 | 0.65065300  |
| <b>39-ts-L2</b> |             |             |             | C | -3.56218900 | -3.80191300 | 1.31103300  |
| C               | 0.96089000  | 5.04741400  | -2.53469900 | C | -3.86283100 | -4.95033300 | 2.01101400  |
| C               | -0.13859400 | 5.06682900  | -3.30173300 | C | -2.92888300 | -6.00764100 | 2.10063100  |
| C               | -1.39572700 | 5.69938600  | -2.84050400 | H | -0.96285200 | -6.67774800 | 1.56372200  |
| C               | -1.35793400 | 6.34654300  | -1.50859200 | H | -4.29159900 | -3.00282300 | 1.26430300  |
| C               | -0.25742700 | 6.31873800  | -0.74301100 | H | -4.82804600 | -5.04165500 | 2.50206900  |
| C               | 1.05158300  | 5.69155800  | -1.16940100 | H | -3.17988900 | -6.90979800 | 2.65190200  |
| H               | 1.86977400  | 4.55208000  | -2.87348000 | C | -0.08647100 | -4.55865800 | 0.16730300  |
| H               | -0.17044100 | 4.59810200  | -4.28147600 | H | 0.64580500  | -5.35585900 | 0.27228300  |
| H               | -2.28147600 | 6.81757700  | -1.18200900 | C | -1.97553700 | -2.46103500 | -0.11354900 |
| H               | -0.25280900 | 6.77045000  | 0.24773600  | C | 0.22611600  | -3.42265000 | -0.53144600 |
| O               | -2.42430400 | 5.66428900  | -3.51288900 | C | -0.71923500 | -2.36765200 | -0.71478900 |
| O               | 1.50718800  | 4.74435300  | -0.18884400 | H | 1.21696100  | -3.32897700 | -0.96255800 |
| C               | 2.14649400  | 6.77786300  | -1.19112300 | P | -0.05982000 | -0.80284100 | -1.44948900 |
| H               | 2.25364600  | 7.20918500  | -0.19086700 | C | 1.08755700  | -1.35457800 | -2.81208700 |
| H               | 3.10410800  | 6.33102600  | -1.47693000 | C | 0.97390600  | -2.57373200 | -3.50070400 |
| H               | 1.89680600  | 7.57225600  | -1.90095900 | C | 2.03847300  | -0.42235200 | -3.25797600 |
| C               | 0.63917400  | 3.59742100  | 0.01155900  | C | 1.79690500  | -2.85685800 | -4.59226900 |
| H               | -0.35191900 | 3.95258200  | 0.32422700  | H | 0.24333600  | -3.31245000 | -3.18680300 |
| H               | 0.52045400  | 3.09223300  | -0.95166800 | C | 2.85436200  | -0.70112100 | -4.35604800 |
| C               | 1.18933300  | 2.63091500  | 1.04216600  | H | 2.14442700  | 0.52280200  | -2.73371400 |
| C               | 1.53973200  | 3.07933800  | 2.28403900  | C | 2.73864700  | -1.92104300 | -5.02575800 |
| Rh              | 0.68787100  | 0.68989900  | 0.18171100  | H | 1.69476200  | -3.80790700 | -5.10867000 |
| C               | 2.25213100  | 2.26965400  | 3.30365600  | H | 3.58191500  | 0.03640200  | -4.68488100 |
| C               | 3.06184800  | 2.88988600  | 4.27456400  | H | 3.37277600  | -2.13951500 | -5.88104100 |
| C               | 2.18501200  | 0.86230000  | 3.35682700  | C | -1.36987700 | -0.09403800 | -2.56236100 |
| C               | 3.77338900  | 2.16422500  | 5.23352700  | C | -2.02840400 | -0.88400600 | -3.51695500 |
| H               | 3.16319300  | 3.97025000  | 4.28314600  | C | -1.60739500 | 1.28650500  | -2.55156200 |
| C               | 2.87589500  | 0.12562200  | 4.30712300  | C | -2.91272800 | -0.30792300 | -4.42710200 |
| H               | 1.55880000  | 0.35053900  | 2.63830900  | H | -1.85360300 | -1.95472900 | -3.55202200 |
| C               | 3.68307400  | 0.76921600  | 5.25611900  | C | -2.48635900 | 1.86920000  | -3.46943800 |
| H               | 4.38833700  | 2.69793700  | 5.94989100  | H | -1.09506800 | 1.90154300  | -1.81821700 |
| H               | 2.78965100  | -0.95635100 | 4.34698800  | C | -3.14093300 | 1.07048500  | -4.40757600 |
| C               | 5.99301500  | -2.28020100 | 0.56474300  | H | -3.42324200 | -0.93641900 | -5.15190700 |
| C               | 5.93741100  | -3.58182200 | 0.88153600  | H | -2.65378100 | 2.94310100  | -3.45824600 |
| C               | 5.51853800  | -4.60684200 | -0.10402200 | H | -3.82405800 | 1.52060300  | -5.12304200 |
| C               | 5.12134700  | -4.10628800 | -1.44149300 | C | -5.24334600 | 0.36487400  | -0.34624900 |
| C               | 5.17929000  | -2.80411900 | -1.75584900 | C | -5.29795400 | -0.82515700 | -1.10853500 |
| C               | 5.69763500  | -1.73883300 | -0.81627800 | C | -4.18564800 | -1.72373700 | -1.04880100 |
| H               | 6.28499200  | -1.53343900 | 1.30166300  | C | -3.03471900 | -1.39912400 | -0.24142700 |
| H               | 6.18382600  | -3.94776400 | 1.87474900  | C | -2.98637300 | -0.17324100 | 0.43836300  |
| H               | 4.76996200  | -4.85588300 | -2.14568300 | C | -4.12744000 | 0.67786500  | 0.38794700  |
| H               | 4.86111200  | -2.44655800 | -2.73373100 | H | -6.09839400 | 1.03700100  | -0.34965500 |
| O               | 5.48233000  | -5.80103500 | 0.17810200  | H | -4.13492700 | 1.59379900  | 0.96193000  |
| O               | 4.78555400  | -0.62952100 | -0.74432100 | C | -6.42602000 | -1.14441600 | -1.91096200 |
| C               | 6.98602400  | -1.12687900 | -1.40559000 | H | -7.25846100 | -0.44511400 | -1.93576300 |
| H               | 6.77134800  | -0.69985900 | -2.39032600 | C | -4.26343600 | -2.91689000 | -1.82484500 |
| H               | 7.34218300  | -0.32427700 | -0.75185400 | H | -3.43352000 | -3.61346000 | -1.80931800 |
| H               | 7.76842600  | -1.88486300 | -1.50407900 | C | -6.46481100 | -2.30702400 | -2.64471500 |
| C               | 3.47464800  | -0.94778900 | -0.24960100 | C | -5.36647300 | -3.19816400 | -2.60039500 |
| H               | 2.96230600  | -1.61720700 | -0.94796400 | H | -7.33064300 | -2.54217700 | -3.25773700 |
| H               | 3.55749500  | -1.47823200 | 0.71167700  | H | -5.39317500 | -4.11444900 | -3.18426900 |
|                 |             |             |             | P | -1.42998100 | 0.41179300  | 1.32937800  |

|              |             |             |             |    |             |             |             |
|--------------|-------------|-------------|-------------|----|-------------|-------------|-------------|
| C            | -1.31700700 | -0.89681000 | 2.64239400  | Rh | 0.72448300  | 0.28234400  | 0.56955200  |
| C            | -0.15978000 | -1.67283200 | 2.77629700  | C  | 2.54437400  | 0.60336900  | 3.28190600  |
| C            | -2.40398000 | -1.15281300 | 3.49633300  | C  | 1.67117100  | 0.09511900  | 4.26479300  |
| C            | -0.07722000 | -2.66756100 | 3.75374700  | C  | 3.88745400  | 0.21170600  | 3.37665800  |
| H            | 0.66685200  | -1.50334200 | 2.09365300  | C  | 2.09967400  | -0.78402600 | 5.24999700  |
| C            | -2.31844900 | -2.13816700 | 4.47875800  | H  | 0.62407400  | 0.37827800  | 4.24762600  |
| H            | -3.32035000 | -0.57779000 | 3.39539100  | C  | 4.34038600  | -0.66691000 | 4.36486500  |
| C            | -1.15199800 | -2.89611100 | 4.61235600  | H  | 4.61225700  | 0.61158000  | 2.67929600  |
| H            | 0.82602600  | -3.26581800 | 3.83818900  | C  | 3.44315600  | -1.17906100 | 5.30744300  |
| H            | -3.16538800 | -2.31960600 | 5.13531400  | H  | 1.40809700  | -1.17685300 | 5.98925300  |
| H            | -1.08783200 | -3.66749000 | 5.37510800  | H  | 5.39238100  | -0.92909100 | 4.39326300  |
| C            | -1.98100400 | 1.90695700  | 2.29105000  | C  | 5.07810800  | -3.92661800 | 0.33441700  |
| C            | -1.83307600 | 1.99719500  | 3.68338300  | C  | 4.70003900  | -5.14284600 | 0.75304700  |
| C            | -2.42567200 | 3.05099000  | 1.60179400  | C  | 3.79328500  | -5.99594100 | -0.05091700 |
| C            | -2.16118300 | 3.17220400  | 4.36594700  | C  | 3.29328900  | -5.40876800 | -1.31607600 |
| H            | -1.45656500 | 1.15168500  | 4.24691300  | C  | 3.67179800  | -4.19100900 | -1.73151500 |
| C            | -2.77155000 | 4.21708000  | 2.28391900  | C  | 4.67749800  | -3.33208100 | -0.99710700 |
| H            | -2.50874100 | 3.03436200  | 0.51880200  | H  | 5.73008300  | -3.30008400 | 0.94139600  |
| C            | -2.64402200 | 4.28154400  | 3.67361000  | H  | 5.02632100  | -5.55773600 | 1.70310700  |
| H            | -2.03769100 | 3.21287300  | 5.44502600  | H  | 2.59640700  | -6.02159700 | -1.88213900 |
| H            | -3.13189200 | 5.07718600  | 1.72540200  | H  | 3.28632300  | -3.76693900 | -2.65671800 |
| H            | -2.90774000 | 5.19081800  | 4.20710300  | O  | 3.46205400  | -7.11901800 | 0.31877700  |
| O            | 4.32278700  | -0.04366300 | 6.15217500  | O  | 4.19685500  | -1.98912600 | -0.83091400 |
| C            | 5.12531200  | 0.56480000  | 7.14731600  | C  | 5.93544800  | -3.17765200 | -1.87963900 |
| H            | 5.52535400  | -0.25076900 | 7.75342400  | H  | 5.65766700  | -2.70376800 | -2.82628000 |
| H            | 5.95876600  | 1.13038300  | 6.70810500  | H  | 6.66444900  | -2.53661300 | -1.37331500 |
| H            | 4.53754100  | 1.23683500  | 7.78765400  | H  | 6.39317300  | -4.15021200 | -2.08278000 |
| C            | 1.26760700  | 4.52102200  | 2.70056500  | C  | 2.96957200  | -1.86252300 | -0.08128500 |
| H            | 2.13977100  | 5.17200600  | 2.55230700  | H  | 2.16696200  | -2.37124800 | -0.62507400 |
| H            | 0.44500700  | 4.95738100  | 2.13246600  | H  | 3.07902700  | -2.38794800 | 0.88176300  |
| H            | 0.99563500  | 4.56370100  | 3.76081600  | C  | 2.60362900  | -0.44416000 | 0.21121200  |
| C            | 3.88884000  | 2.63765100  | 0.18196600  | C  | 3.38191400  | 0.63710400  | 0.37927100  |
| H            | 4.80855900  | 2.25726900  | -0.27997600 | C  | -3.57401700 | -5.07902100 | 1.01350800  |
| H            | 3.54072300  | 3.52113500  | -0.35787500 | C  | -2.84175200 | -4.02580700 | 0.40593000  |
| H            | 4.10807000  | 2.94841500  | 1.20944800  | C  | -3.44005900 | -2.73345600 | 0.25595700  |
|              |             |             |             | C  | -4.76104200 | -2.55885600 | 0.75804700  |
|              |             |             |             | C  | -5.44802400 | -3.59894300 | 1.34615700  |
|              |             |             |             | C  | -4.85560100 | -4.87610500 | 1.47249100  |
|              |             |             |             | H  | -3.09764800 | -6.05165900 | 1.11146000  |
|              |             |             |             | H  | -5.23391300 | -1.58749800 | 0.67885700  |
|              |             |             |             | H  | -6.45549300 | -3.43354600 | 1.71873800  |
|              |             |             |             | H  | -5.40903000 | -5.68883100 | 1.93501700  |
|              |             |             |             | C  | -1.51472300 | -4.22049500 | -0.05514800 |
|              |             |             |             | H  | -1.04959400 | -5.19596900 | 0.06597900  |
|              |             |             |             | C  | -2.70124200 | -1.66756500 | -0.38248700 |
|              |             |             |             | C  | -0.81913500 | -3.19379900 | -0.63578600 |
|              |             |             |             | C  | -1.40123900 | -1.90204400 | -0.83087900 |
|              |             |             |             | H  | 0.20050200  | -3.37189300 | -0.95898700 |
|              |             |             |             | P  | -0.20035600 | -0.58623900 | -1.34808200 |
|              |             |             |             | C  | 0.78766100  | -1.38381100 | -2.71352400 |
|              |             |             |             | C  | 0.29492600  | -2.42179200 | -3.52226900 |
|              |             |             |             | C  | 2.01712200  | -0.79746700 | -3.05121800 |
|              |             |             |             | C  | 1.01425700  | -2.86175200 | -4.63502900 |
|              |             |             |             | H  | -0.65517000 | -2.89218800 | -3.28877200 |
|              |             |             |             | C  | 2.73101300  | -1.23108900 | -4.16996400 |
|              |             |             |             | H  | 2.42147800  | -0.00689500 | -2.42760200 |
|              |             |             |             | C  | 2.23271000  | -2.26392300 | -4.96636500 |
|              |             |             |             | H  | 0.61582400  | -3.66621500 | -5.24806400 |
|              |             |             |             |    |             |             |             |
| <b>40-L2</b> |             |             |             |    |             |             |             |
| C            | 3.52922000  | 5.02987100  | -1.58017100 |    |             |             |             |
| C            | 2.67373700  | 5.49817100  | -2.50009500 |    |             |             |             |
| C            | 1.42919100  | 6.20383900  | -2.11610100 |    |             |             |             |
| C            | 1.21103700  | 6.41169100  | -0.66546800 |    |             |             |             |
| C            | 2.06769000  | 5.93908900  | 0.25102800  |    |             |             |             |
| C            | 3.34287900  | 5.20050200  | -0.08925500 |    |             |             |             |
| H            | 4.42465100  | 4.48462900  | -1.87509900 |    |             |             |             |
| H            | 2.83460100  | 5.36076700  | -3.56597400 |    |             |             |             |
| H            | 0.30553000  | 6.94805400  | -0.39322700 |    |             |             |             |
| H            | 1.87819500  | 6.06761400  | 1.31549900  |    |             |             |             |
| O            | 0.60842700  | 6.57478300  | -2.95200300 |    |             |             |             |
| O            | 3.37170900  | 3.92410700  | 0.57591800  |    |             |             |             |
| C            | 4.54747500  | 5.96233900  | 0.49640500  |    |             |             |             |
| H            | 4.43693600  | 6.04218900  | 1.58244800  |    |             |             |             |
| H            | 5.46854200  | 5.41020800  | 0.28485300  |    |             |             |             |
| H            | 4.62305900  | 6.96609600  | 0.06741100  |    |             |             |             |
| C            | 2.35433000  | 2.98753900  | 0.16360900  |    |             |             |             |
| H            | 1.36167600  | 3.43105500  | 0.29950000  |    |             |             |             |
| H            | 2.47252500  | 2.75791000  | -0.90176500 |    |             |             |             |
| C            | 2.51548500  | 1.71554400  | 0.96657500  |    |             |             |             |
| C            | 2.06072600  | 1.62189100  | 2.28816900  |    |             |             |             |

|   |             |             |             |              |             |             |             |
|---|-------------|-------------|-------------|--------------|-------------|-------------|-------------|
| H | 3.68011500  | -0.76136800 | -4.41438400 | H            | 0.94593000  | 3.51643400  | 2.28822700  |
| H | 2.78711800  | -2.60050100 | -5.83858700 | H            | 0.69771300  | 2.53267500  | 3.72526600  |
| C | -1.02986700 | 0.67197000  | -2.43506500 | H            | 2.22582200  | 3.37535200  | 3.50044700  |
| C | -1.86180400 | 0.31469600  | -3.50613600 | C            | 4.83308600  | 0.90494000  | 0.05434400  |
| C | -0.67149900 | 2.01795900  | -2.27805700 | H            | 5.35048900  | -0.02110300 | -0.20113800 |
| C | -2.34416000 | 1.28668400  | -4.38169400 | H            | 4.91979800  | 1.58708200  | -0.80513700 |
| H | -2.13753600 | -0.72376300 | -3.66072800 | H            | 5.35699200  | 1.40101800  | 0.88251000  |
| C | -1.13969500 | 2.99195500  | -3.16466500 |              |             |             |             |
| H | -0.01067600 | 2.28691600  | -1.45873600 | <b>41-L2</b> |             |             |             |
| C | -1.98154200 | 2.62611300  | -4.21555600 | C            | -5.18314600 | 4.48650100  | -1.03770400 |
| H | -3.00048300 | 0.99565400  | -5.19751800 | C            | -3.89912000 | 4.09391900  | -0.57330300 |
| H | -0.83986200 | 4.02993500  | -3.04281200 | C            | -3.78198600 | 3.06214500  | 0.41140600  |
| H | -2.34814800 | 3.38012800  | -4.90705600 | C            | -4.98394600 | 2.45167800  | 0.87371900  |
| C | -4.93501800 | 2.00221400  | -0.87360300 | C            | -6.21541400 | 2.84703000  | 0.40049100  |
| C | -5.24629600 | 0.88700400  | -1.68589900 | C            | -6.32176000 | 3.87902200  | -0.56228300 |
| C | -4.47113100 | -0.30606900 | -1.53185700 | H            | -5.24578300 | 5.27597400  | -1.78299400 |
| C | -3.39976700 | -0.35080200 | -0.56732900 | H            | -4.92456000 | 1.65629800  | 1.60726400  |
| C | -3.08726400 | 0.79011600  | 0.18000600  | H            | -7.11459500 | 2.36057300  | 0.76913000  |
| C | -3.88998700 | 1.95546100  | 0.01444200  | H            | -7.29976000 | 4.18397600  | -0.92472600 |
| H | -5.53123400 | 2.90723700  | -0.96486200 | C            | -2.71678200 | 4.69861600  | -1.05946000 |
| H | -3.68535800 | 2.83361600  | 0.61120900  | H            | -2.79344800 | 5.50111100  | -1.78957300 |
| C | -6.29730900 | 0.93087500  | -2.64103500 | C            | -2.48090100 | 2.65916900  | 0.88246900  |
| H | -6.87398100 | 1.84805800  | -2.73520200 | C            | -1.48334000 | 4.27964800  | -0.62781500 |
| C | -4.78672200 | -1.41008200 | -2.37704900 | C            | -1.33019900 | 3.24423600  | 0.33804300  |
| H | -4.20895500 | -2.32300300 | -2.29319200 | H            | -0.60645000 | 4.76896800  | -1.02820900 |
| C | -6.57543400 | -0.15671300 | -3.43565400 | P            | 0.41299900  | 2.64444700  | 0.75234500  |
| C | -5.80435300 | -1.33615500 | -3.30255500 | C            | 1.47479200  | 4.02424800  | 0.08946200  |
| H | -7.37905300 | -0.11334600 | -4.16576900 | C            | 1.64499800  | 4.12258500  | -1.30347600 |
| H | -6.01813300 | -2.19296300 | -3.93597700 | C            | 2.16381500  | 4.93248600  | 0.90518900  |
| P | -1.59575400 | 0.84825800  | 1.33607700  | C            | 2.42778100  | 5.13101700  | -1.86229100 |
| C | -2.10520800 | -0.37537200 | 2.62716100  | H            | 1.16864200  | 3.40095800  | -1.95943300 |
| C | -1.18026000 | -1.34688200 | 3.03391200  | C            | 2.96770300  | 5.93125200  | 0.34542200  |
| C | -3.38775100 | -0.37612900 | 3.20166300  | H            | 2.08360900  | 4.86978600  | 1.98370600  |
| C | -1.52080500 | -2.28880700 | 4.00838700  | C            | 3.09277600  | 6.04318700  | -1.03765800 |
| H | -0.19445900 | -1.36342800 | 2.57491800  | H            | 2.53024000  | 5.19057900  | -2.94249100 |
| C | -3.72454300 | -1.31143300 | 4.17936100  | H            | 3.49159200  | 6.62327200  | 0.99974500  |
| H | -4.12579700 | 0.35416500  | 2.88078200  | H            | 3.71031300  | 6.82523700  | -1.47162000 |
| C | -2.79026800 | -2.26858600 | 4.58609900  | C            | 0.46354600  | 2.94614000  | 2.58145000  |
| H | -0.79178900 | -3.03537600 | 4.31124000  | C            | -0.01057200 | 4.14899200  | 3.13272400  |
| H | -4.71908900 | -1.29984300 | 4.61761300  | C            | 1.00344200  | 1.97899100  | 3.43738500  |
| H | -3.05673500 | -3.00025400 | 5.34428400  | C            | 0.07763700  | 4.38421400  | 4.50410100  |
| C | -1.82890900 | 2.49398500  | 2.16898400  | H            | -0.45179800 | 4.90370800  | 2.48788800  |
| C | -2.16286800 | 2.64589200  | 3.52215300  | C            | 1.08605300  | 2.21249200  | 4.81233700  |
| C | -1.56975600 | 3.65405800  | 1.41490200  | H            | 1.34733200  | 1.03863300  | 3.02031700  |
| C | -2.24909300 | 3.91666500  | 4.09989600  | C            | 0.62944200  | 3.41642200  | 5.34787300  |
| H | -2.35644300 | 1.77338100  | 4.13613300  | H            | -0.29434400 | 5.31875400  | 4.91530500  |
| C | -1.67897300 | 4.92173900  | 1.98457100  | H            | 1.50439500  | 1.44819900  | 5.46204700  |
| H | -1.29255800 | 3.56475900  | 0.36784000  | H            | 0.69279300  | 3.59906200  | 6.41734300  |
| C | -2.01589400 | 5.05809400  | 3.33427200  | C            | -2.26616400 | -0.14380200 | 4.17777800  |
| H | -2.50513200 | 4.00875100  | 5.15224900  | C            | -2.79374000 | 1.15193300  | 4.40442000  |
| H | -1.49228400 | 5.80197400  | 1.37495200  | C            | -2.85453100 | 2.07306500  | 3.30939600  |
| H | -2.09201500 | 6.04482000  | 3.78307800  | C            | -2.42329800 | 1.65303800  | 1.99637900  |
| O | 3.77195600  | -2.04414700 | 6.31385200  | C            | -1.96699400 | 0.34833000  | 1.80711000  |
| C | 5.11918300  | -2.46980500 | 6.41387500  | C            | -1.85496000 | -0.52908000 | 2.92808800  |
| H | 5.79916700  | -1.62570000 | 6.59289500  | H            | -2.18139800 | -0.83409900 | 5.01393400  |
| H | 5.15805000  | -3.14977100 | 7.26731200  | H            | -1.41496600 | -1.51022700 | 2.79639000  |
| H | 5.44375100  | -3.00449000 | 5.51069000  | C            | -3.23909500 | 1.55373100  | 5.69164000  |
| C | 1.43331100  | 2.82481500  | 2.97345700  | H            | -3.18597800 | 0.83400900  | 6.50526300  |

|    |             |             |             |                 |             |             |             |
|----|-------------|-------------|-------------|-----------------|-------------|-------------|-------------|
| C  | -3.34291700 | 3.38378000  | 3.57947100  | C               | 1.61452400  | 0.72988600  | -5.28406200 |
| H  | -3.38159400 | 4.11104000  | 2.77793700  | H               | 2.85497600  | 2.34843100  | -6.01850500 |
| C  | -3.72561800 | 2.82234500  | 5.90873500  | H               | 0.53722300  | -0.80816700 | -4.24939300 |
| C  | -3.77107800 | 3.74508600  | 4.83839200  | O               | 0.96673300  | 0.39412400  | -6.44215000 |
| H  | -4.06779100 | 3.11853400  | 6.89671800  | C               | 1.30458900  | 1.10069600  | -7.62172900 |
| H  | -4.14458400 | 4.75121400  | 5.01002100  | H               | 0.69413100  | 0.66906600  | -8.41765000 |
| P  | -1.20177400 | -0.24291700 | 0.22783100  | H               | 1.07722200  | 2.17221800  | -7.53349400 |
| C  | -2.22588900 | 0.38960800  | -1.18797500 | H               | 2.36691100  | 0.98204900  | -7.87548800 |
| C  | -1.59621400 | 1.01420200  | -2.27028100 | C               | 4.94123800  | 2.12420700  | -1.63837700 |
| C  | -3.60149700 | 0.11784400  | -1.26843700 | H               | 5.42674200  | 1.72136400  | -2.53419100 |
| C  | -2.32404800 | 1.36533400  | -3.41051300 | H               | 4.91800000  | 3.21840400  | -1.74648300 |
| H  | -0.53091400 | 1.21185700  | -2.22504700 | H               | 5.59062500  | 1.88395400  | -0.79629800 |
| C  | -4.32994800 | 0.47961500  | -2.39948600 |                 |             |             |             |
| H  | -4.10528500 | -0.38648900 | -0.44945900 | <b>42-ts-L2</b> |             |             |             |
| C  | -3.69162200 | 1.10170200  | -3.47637800 | C               | -4.72003100 | 1.60255700  | 3.69265900  |
| H  | -1.81374400 | 1.83558500  | -4.24677400 | C               | -3.65837700 | 0.88326500  | 3.08061300  |
| H  | -5.39554000 | 0.27085200  | -2.44264200 | C               | -3.63887000 | 0.71591900  | 1.65886700  |
| H  | -4.25884900 | 1.37201000  | -4.36334800 | C               | -4.69764800 | 1.30571800  | 0.90933700  |
| C  | -1.71823100 | -2.02279800 | 0.04302200  | C               | -5.71038800 | 2.00378000  | 1.52883900  |
| C  | -1.10777900 | -2.73928100 | -0.99984500 | C               | -5.72869500 | 2.15239600  | 2.93638300  |
| C  | -2.74683000 | -2.64569100 | 0.76284900  | H               | -4.71535600 | 1.71309000  | 4.77456200  |
| C  | -1.49063700 | -4.04667900 | -1.29588500 | H               | -4.69925200 | 1.20603900  | -0.16975200 |
| H  | -0.33669100 | -2.26356000 | -1.60100200 | H               | -6.50336700 | 2.44532300  | 0.93106300  |
| C  | -3.12808000 | -3.95728200 | 0.46981500  | H               | -6.53579500 | 2.70209900  | 3.41314300  |
| H  | -3.25878500 | -2.11566500 | 1.55833700  | C               | -2.60696700 | 0.32087000  | 3.84196400  |
| C  | -2.49912100 | -4.66475500 | -0.55421800 | H               | -2.62455300 | 0.42217800  | 4.92477500  |
| H  | -1.00132600 | -4.58046200 | -2.10634400 | C               | -2.56317200 | -0.01009500 | 1.03366400  |
| H  | -3.92258200 | -4.42347100 | 1.04685200  | C               | -1.57026400 | -0.33868300 | 3.22978800  |
| H  | -2.79612800 | -5.68587500 | -0.77757500 | C               | -1.51393600 | -0.50825200 | 1.81721000  |
| Rh | 1.14160600  | 0.43261100  | 0.20421800  | H               | -0.78150000 | -0.74923400 | 3.84666000  |
| C  | 3.50684100  | -0.93434400 | 2.82724100  | P               | 0.01770300  | -1.29459700 | 1.05526000  |
| C  | 2.32632800  | -1.45604200 | 3.18621500  | C               | 0.89553200  | -1.99848000 | 2.53740400  |
| C  | 1.38277500  | -2.00120600 | 2.18347100  | C               | 0.94816400  | -3.36479100 | 2.84794300  |
| C  | 1.69322000  | -1.73570000 | 0.75834900  | C               | 1.61288000  | -1.10416600 | 3.35297000  |
| C  | 2.89593300  | -1.14222200 | 0.38537900  | C               | 1.66537300  | -3.81901100 | 3.95964100  |
| C  | 4.00507500  | -0.87995000 | 1.40016800  | H               | 0.43297300  | -4.08653000 | 2.22480300  |
| H  | 4.21081000  | -0.56009900 | 3.56893800  | C               | 2.30812300  | -1.55295400 | 4.47449800  |
| H  | 2.02308400  | -1.54962300 | 4.22623200  | H               | 1.63244400  | -0.04752200 | 3.10247400  |
| H  | 1.13310400  | -2.33675000 | 0.05234600  | C               | 2.33590500  | -2.91589900 | 4.78325200  |
| H  | 3.24718300  | -1.26836800 | -0.63401500 | H               | 1.69186900  | -4.88312300 | 4.18004700  |
| O  | 0.42087100  | -2.68800200 | 2.53194100  | H               | 2.84388000  | -0.84009200 | 5.09565900  |
| O  | 4.72123600  | 0.33796800  | 1.18581200  | H               | 2.88626400  | -3.26927500 | 5.65120700  |
| C  | 5.07911200  | -1.97923400 | 1.22293200  | C               | -0.73151900 | -2.78957200 | 0.25274000  |
| H  | 5.48426300  | -1.92954700 | 0.20715300  | C               | -1.65379500 | -3.60294500 | 0.93369700  |
| H  | 5.89884100  | -1.80684800 | 1.92805500  | C               | -0.38472400 | -3.12015800 | -1.06336400 |
| H  | 4.65896400  | -2.97389400 | 1.39858500  | C               | -2.19061400 | -4.73470600 | 0.32081900  |
| C  | 3.88052100  | 1.48688200  | 0.98189700  | H               | -1.95832700 | -3.34780900 | 1.94495000  |
| H  | 3.27688700  | 1.66465500  | 1.87996300  | C               | -0.92773900 | -4.25060300 | -1.67910500 |
| H  | 4.57878200  | 2.32334900  | 0.89272900  | H               | 0.29916200  | -2.47659800 | -1.60731000 |
| C  | 3.01395700  | 1.28487000  | -0.24412200 | C               | -1.82568900 | -5.06318900 | -0.98748100 |
| C  | 3.54025000  | 1.52948900  | -1.47562700 | H               | -2.90235400 | -5.35368200 | 0.86064200  |
| C  | 2.85050400  | 1.25835600  | -2.76627100 | H               | -0.65094900 | -4.48935500 | -2.70261800 |
| C  | 3.17218600  | 1.98818800  | -3.92700800 | H               | -2.24920200 | -5.94200700 | -1.46648700 |
| C  | 1.88107000  | 0.24518600  | -2.92562700 | C               | -2.82141700 | -0.83341700 | -3.21456900 |
| C  | 2.56823700  | 1.74544500  | -5.16370600 | C               | -3.74366700 | -1.45022500 | -2.33156400 |
| H  | 3.91032800  | 2.78177300  | -3.87330600 | C               | -3.64238400 | -1.18080400 | -0.92826900 |
| C  | 1.27781500  | -0.02015400 | -4.14895700 | C               | -2.64676000 | -0.25076200 | -0.44857600 |
| H  | 1.59380700  | -0.34730200 | -2.06003800 | C               | -1.80064600 | 0.38005100  | -1.36129900 |

|    |             |             |             |
|----|-------------|-------------|-------------|
| C  | -1.87252000 | 0.03836600  | -2.74698400 |
| H  | -2.86892600 | -1.06790100 | -4.27561600 |
| H  | -1.14944500 | 0.45746100  | -3.43852500 |
| C  | -4.74220200 | -2.33922300 | -2.80968100 |
| H  | -4.80197600 | -2.52265200 | -3.88002100 |
| C  | -4.54623200 | -1.85912500 | -0.06130700 |
| H  | -4.47897100 | -1.69554000 | 1.00723800  |
| C  | -5.61390300 | -2.95778200 | -1.94285900 |
| C  | -5.50614300 | -2.71640100 | -0.55400500 |
| H  | -6.37707700 | -3.63356900 | -2.31948700 |
| H  | -6.18513200 | -3.21412600 | 0.13339600  |
| P  | -0.35143500 | 1.41618900  | -0.85868400 |
| C  | -0.89945500 | 2.54145600  | 0.52326500  |
| C  | -0.14033200 | 2.63766900  | 1.69573700  |
| C  | -1.98956600 | 3.41192600  | 0.35836800  |
| C  | -0.46078000 | 3.57406200  | 2.68247100  |
| H  | 0.70483600  | 1.97405200  | 1.83800600  |
| C  | -2.31644300 | 4.34031300  | 1.34485800  |
| H  | -2.58264900 | 3.37383600  | -0.55006800 |
| C  | -1.55020800 | 4.42698600  | 2.51019100  |
| H  | 0.14277700  | 3.63149700  | 3.58478300  |
| H  | -3.16910400 | 4.99863900  | 1.20190600  |
| H  | -1.80173600 | 5.15624000  | 3.27588700  |
| C  | -0.21561800 | 2.75992600  | -2.13845900 |
| C  | 0.94831000  | 3.54415600  | -2.10167700 |
| C  | -1.23790400 | 3.12558100  | -3.02441700 |
| C  | 1.09681300  | 4.64618500  | -2.94197000 |
| H  | 1.74345300  | 3.29653100  | -1.40357600 |
| C  | -1.08684000 | 4.22611000  | -3.87125700 |
| H  | -2.15829100 | 2.55299400  | -3.06563700 |
| C  | 0.08094800  | 4.98733800  | -3.83707700 |
| H  | 2.00896000  | 5.23595800  | -2.90010500 |
| H  | -1.88814400 | 4.48623900  | -4.55822300 |
| H  | 0.19770600  | 5.84158300  | -4.49863300 |
| Rh | 1.43393200  | -0.05356600 | -0.41994600 |
| C  | 2.83003900  | -2.27026300 | -3.16097100 |
| C  | 1.85292200  | -1.50895100 | -3.66809500 |
| C  | 1.76252500  | -0.05682200 | -3.37029400 |
| C  | 2.57391600  | 0.44356600  | -2.24335600 |
| C  | 3.55360300  | -0.38935100 | -1.62161100 |
| C  | 3.91118700  | -1.75160600 | -2.23822100 |
| H  | 2.92459600  | -3.32353300 | -3.42134400 |
| H  | 1.12635800  | -1.89522600 | -4.37918900 |
| H  | 2.74405500  | 1.51570500  | -2.24885700 |
| H  | 4.40659700  | 0.14470600  | -1.21639500 |
| O  | 1.07571700  | 0.67666400  | -4.08759700 |
| O  | 4.17421200  | -2.73645300 | -1.23227100 |
| C  | 5.22806400  | -1.61541000 | -3.02578000 |
| H  | 6.02991500  | -1.30413200 | -2.34827800 |
| H  | 5.50135500  | -2.58281200 | -3.46006900 |
| H  | 5.12960600  | -0.88199300 | -3.83177400 |
| C  | 3.20333800  | -2.64523500 | -0.17722000 |
| H  | 2.22955500  | -2.99448300 | -0.53776400 |
| H  | 3.54739200  | -3.34251100 | 0.58860500  |
| C  | 3.16534500  | -1.19988800 | 0.26793800  |
| C  | 4.10297400  | -0.76318800 | 1.17059600  |
| C  | 4.42855000  | 0.66330600  | 1.38757200  |
| C  | 5.73118000  | 1.06201700  | 1.77712100  |

|   |            |             |            |
|---|------------|-------------|------------|
| C | 3.49932000 | 1.69907900  | 1.18918700 |
| C | 6.07271000 | 2.39578900  | 1.94482200 |
| H | 6.50305900 | 0.31423800  | 1.92793700 |
| C | 3.82207400 | 3.04694600  | 1.36118700 |
| H | 2.48337100 | 1.42886500  | 0.89617500 |
| C | 5.11882600 | 3.40571900  | 1.74347400 |
| H | 7.07941800 | 2.68394500  | 2.23231500 |
| H | 3.05062700 | 3.79514000  | 1.21343500 |
| C | 4.97557500 | -1.75034000 | 1.94033600 |
| H | 5.84250900 | -2.07781700 | 1.34882100 |
| H | 5.35045100 | -1.30325400 | 2.86517000 |
| H | 4.42162000 | -2.64621400 | 2.22786200 |
| O | 5.54869000 | 4.68479200  | 1.95185500 |
| C | 4.62500000 | 5.74075700  | 1.74725400 |
| H | 3.76679200 | 5.66602300  | 2.42853200 |
| H | 5.17126700 | 6.66273100  | 1.95586000 |
| H | 4.25827300 | 5.76261900  | 0.71229100 |

#### 42-ts-L2-b

|   |             |             |             |
|---|-------------|-------------|-------------|
| C | -4.74831500 | 1.58036400  | 3.68676400  |
| C | -3.67848300 | 0.87094200  | 3.07751900  |
| C | -3.65043000 | 0.70885400  | 1.65534400  |
| C | -4.70944000 | 1.29428700  | 0.90259200  |
| C | -5.73007000 | 1.98318700  | 1.51942600  |
| C | -5.75676800 | 2.12626500  | 2.92740400  |
| H | -4.74979900 | 1.68698500  | 4.76906600  |
| H | -4.70496500 | 1.19895100  | -0.17687500 |
| H | -6.52277500 | 2.42177900  | 0.91912100  |
| H | -6.56996900 | 2.66879100  | 3.40201300  |
| C | -2.62674100 | 0.31401500  | 3.84238000  |
| H | -2.65033300 | 0.41195200  | 4.92537300  |
| C | -2.56600900 | -0.00692100 | 1.03305500  |
| C | -1.58183700 | -0.33511500 | 3.23325100  |
| C | -1.51730100 | -0.49972500 | 1.82041600  |
| H | -0.79305000 | -0.74133200 | 3.85283300  |
| P | 0.01991400  | -1.28015000 | 1.06354900  |
| C | 0.89764500  | -1.97513400 | 2.54979800  |
| C | 0.96148300  | -3.34036700 | 2.86261100  |
| C | 1.60369100  | -1.07300300 | 3.36663600  |
| C | 1.67832100  | -3.78627500 | 3.97800700  |
| H | 0.45504400  | -4.06769100 | 2.23872700  |
| C | 2.29849000  | -1.51364700 | 4.49161900  |
| H | 1.61296200  | -0.01650800 | 3.11483900  |
| C | 2.33727300  | -2.87581000 | 4.80283100  |
| H | 1.71333900  | -4.84974100 | 4.20042200  |
| H | 2.82468100  | -0.79480800 | 5.11409700  |
| H | 2.88703800  | -3.22283300 | 5.67373700  |
| C | -0.72421300 | -2.78007800 | 0.26456600  |
| C | -1.63765100 | -3.59935600 | 0.95040700  |
| C | -0.38544500 | -3.10646000 | -1.05470200 |
| C | -2.17280800 | -4.73294500 | 0.33940600  |
| H | -1.93666300 | -3.34743500 | 1.96411800  |
| C | -0.92711700 | -4.23851100 | -1.66867500 |
| H | 0.29086300  | -2.45829700 | -1.60267800 |
| C | -1.81560700 | -5.05717800 | -0.97208200 |
| H | -2.87734900 | -5.35666500 | 0.88323800  |
| H | -0.65672100 | -4.47368300 | -2.69471900 |
| H | -2.23795900 | -5.93731900 | -1.44969300 |

|    |             |             |             |              |             |             |             |
|----|-------------|-------------|-------------|--------------|-------------|-------------|-------------|
| C  | -2.80388000 | -0.80770000 | -3.22091000 | H            | 3.52938900  | -3.34971600 | 0.58191200  |
| C  | -3.72650400 | -1.43375500 | -2.34483200 | C            | 3.16641500  | -1.20160500 | 0.27028200  |
| C  | -3.63057400 | -1.17303900 | -0.93952200 | C            | 4.10479000  | -0.77835200 | 1.17868800  |
| C  | -2.64013700 | -0.24202700 | -0.45049600 | C            | 4.45860900  | 0.64215700  | 1.39277200  |
| C  | -1.79144200 | 0.39566400  | -1.35611700 | C            | 5.75435000  | 1.01105400  | 1.80928600  |
| C  | -1.85871300 | 0.06319600  | -2.74438300 | C            | 3.55804300  | 1.70436800  | 1.15658500  |
| H  | -2.84795200 | -1.03448800 | -4.28378500 | C            | 6.13730200  | 2.34269800  | 1.97495000  |
| H  | -1.13538400 | 0.48977000  | -3.43106400 | H            | 6.50294400  | 0.24599500  | 1.98754700  |
| C  | -4.72025800 | -2.32323900 | -2.83192600 | C            | 3.91826100  | 3.03442600  | 1.32347500  |
| H  | -4.77620400 | -2.49952200 | -3.90368600 | H            | 2.54377000  | 1.45749600  | 0.83792700  |
| C  | -4.53406500 | -1.86111600 | -0.07990200 | C            | 5.21549600  | 3.36931300  | 1.73650500  |
| H  | -4.47042700 | -1.70466100 | 0.98991400  | H            | 7.15238000  | 2.56417900  | 2.28561400  |
| C  | -5.59198300 | -2.95119800 | -1.97191900 | H            | 3.20137900  | 3.83320000  | 1.15506600  |
| C  | -5.48895200 | -2.71906100 | -0.58115000 | C            | 4.95305800  | -1.77930900 | 1.95771900  |
| H  | -6.35136800 | -3.62742300 | -2.35538600 | H            | 5.83143800  | -2.10692300 | 1.38317000  |
| H  | -6.16757400 | -3.22449800 | 0.10097000  | H            | 5.30953100  | -1.34331700 | 2.89508500  |
| P  | -0.34303900 | 1.42935200  | -0.84576300 | H            | 4.38726200  | -2.67372900 | 2.22479600  |
| C  | -0.88490200 | 2.54467600  | 0.54458500  | O            | 5.47585400  | 4.70214900  | 1.88154100  |
| C  | -0.10038100 | 2.65841100  | 1.69860000  | C            | 6.77099000  | 5.08885400  | 2.30762700  |
| C  | -1.99291200 | 3.39576000  | 0.40033400  | H            | 7.54384700  | 4.77105200  | 1.59475600  |
| C  | -0.41470600 | 3.59308100  | 2.68884100  | H            | 6.75722500  | 6.17927900  | 2.36030500  |
| H  | 0.76236800  | 2.01348900  | 1.82165800  | H            | 7.00944900  | 4.68139900  | 3.29944500  |
| C  | -2.31393600 | 4.32141200  | 1.39111900  |              |             |             |             |
| H  | -2.60527900 | 3.34309100  | -0.49451100 | <b>43-L2</b> |             |             |             |
| C  | -1.52304500 | 4.42536700  | 2.53853500  | C            | -6.67962100 | -1.22542200 | 0.87025500  |
| H  | 0.21019000  | 3.66755600  | 3.57510600  | C            | -5.29239600 | -1.53032300 | 0.83834500  |
| H  | -3.18067700 | 4.96466800  | 1.26528800  | C            | -4.55260300 | -1.36606600 | -0.37555000 |
| H  | -1.76913100 | 5.15379100  | 3.30675500  | C            | -5.25722400 | -0.87753400 | -1.51433700 |
| C  | -0.20763900 | 2.78066500  | -2.11675200 | C            | -6.60040500 | -0.57818600 | -1.45219500 |
| C  | 0.95706400  | 3.56329500  | -2.07645500 | C            | -7.32561400 | -0.75767100 | -0.25025000 |
| C  | -1.23291600 | 3.15487500  | -2.99563500 | H            | -7.21957600 | -1.36410000 | 1.80407900  |
| C  | 1.10357500  | 4.67323200  | -2.90659300 | H            | -4.72183900 | -0.73115800 | -2.44481900 |
| H  | 1.75356100  | 3.30971900  | -1.38224900 | H            | -7.10838700 | -0.20142500 | -2.33594900 |
| C  | -1.08359100 | 4.26289800  | -3.83285400 | H            | -8.38620200 | -0.52345300 | -0.21621300 |
| H  | -2.15411100 | 2.58364700  | -3.03846200 | C            | -4.60981700 | -2.00076500 | 1.98413900  |
| C  | 0.08489700  | 5.02302000  | -3.79512400 | H            | -5.16704200 | -2.16360700 | 2.90395300  |
| H  | 2.01540500  | 5.26292300  | -2.86009200 | C            | -3.14133400 | -1.66673000 | -0.40972000 |
| H  | -1.88702600 | 4.53021300  | -4.51459500 | C            | -3.25965300 | -2.24199700 | 1.94707500  |
| H  | 0.19965600  | 5.88388000  | -4.44843300 | C            | -2.48707300 | -2.05847600 | 0.76363400  |
| Rh | 1.43881700  | -0.04482400 | -0.41469200 | H            | -2.77918900 | -2.59662000 | 2.84840300  |
| C  | 2.82032400  | -2.25594700 | -3.16256900 | P            | -0.61548700 | -2.29680900 | 0.82708100  |
| C  | 1.84942500  | -1.48521300 | -3.66728600 | C            | -0.36934400 | -2.91674500 | 2.56601500  |
| C  | 1.77060000  | -0.03326600 | -3.36431800 | C            | 0.12562300  | -4.19443100 | 2.86665200  |
| C  | 2.58264300  | 0.45584800  | -2.23322700 | C            | -0.59921000 | -2.02835100 | 3.63362000  |
| C  | 3.55593100  | -0.38740800 | -1.61323600 | C            | 0.36647200  | -4.57680100 | 4.19028100  |
| C  | 3.90476900  | -1.74877200 | -2.23727700 | H            | 0.32464900  | -4.90096300 | 2.06854400  |
| H  | 2.90719700  | -3.30890500 | -3.42690400 | C            | -0.38291900 | -2.41716600 | 4.95485800  |
| H  | 1.12028300  | -1.86310900 | -4.38023000 | H            | -0.96776900 | -1.02700200 | 3.42751800  |
| H  | 2.76021200  | 1.52687400  | -2.23351100 | C            | 0.10578700  | -3.69558600 | 5.23882300  |
| H  | 4.41392600  | 0.13913300  | -1.20840300 | H            | 0.75247100  | -5.57166200 | 4.39725700  |
| O  | 1.09181900  | 0.70834100  | -4.08083100 | H            | -0.58615900 | -1.71855900 | 5.76253100  |
| O  | 4.16100900  | -2.74013900 | -1.23584700 | H            | 0.28446900  | -3.99765000 | 6.26718600  |
| C  | 5.22264400  | -1.61733700 | -3.02377900 | C            | -0.46195900 | -3.84877700 | -0.17874900 |
| H  | 6.02643900  | -1.31521000 | -2.34437800 | C            | -1.30597300 | -4.95134000 | 0.04178100  |
| H  | 5.48955400  | -2.58409900 | -3.46347500 | C            | 0.50156700  | -3.92867100 | -1.19220900 |
| H  | 5.12924200  | -0.87877600 | -3.82567200 | C            | -1.16936100 | -6.11270800 | -0.71719600 |
| C  | 3.19110900  | -2.64593300 | -0.18033100 | H            | -2.07345100 | -4.90101200 | 0.80931300  |
| H  | 2.21456100  | -2.98504600 | -0.54233300 | C            | 0.63440000  | -5.09184500 | -1.95615700 |



|    |             |             |             |              |            |             |             |
|----|-------------|-------------|-------------|--------------|------------|-------------|-------------|
| H  | 1.13376500  | -3.07002500 | -1.39768000 | H            | 6.46350200 | -0.85013100 | -1.16383900 |
| C  | -0.19512800 | -6.18669400 | -1.71706100 | H            | 6.24561800 | -1.91064800 | -2.57183400 |
| H  | -1.82775100 | -6.95781200 | -0.53330500 | H            | 5.65516300 | -0.23605500 | -2.63213400 |
| H  | 1.38546900  | -5.13475100 | -2.74035700 | C            | 3.70213100 | -2.72502400 | 0.46756900  |
| H  | -0.09266900 | -7.09078300 | -2.31148500 | H            | 2.86506700 | -3.35495100 | 0.13420800  |
| C  | -1.38652600 | -1.50777600 | -4.36681800 | H            | 4.14679700 | -3.19241500 | 1.35213400  |
| C  | -2.29029600 | -2.55108900 | -4.04532300 | C            | 3.29940300 | -1.27444900 | 0.69825800  |
| C  | -2.82406000 | -2.61418700 | -2.71768200 | C            | 2.91392700 | -0.74842900 | 1.90063000  |
| C  | -2.46918500 | -1.59953600 | -1.75257400 | C            | 2.98669100 | 0.71009700  | 2.24545700  |
| C  | -1.57239000 | -0.59109900 | -2.11184000 | C            | 1.92619300 | 1.36265400  | 2.88708900  |
| C  | -1.02219000 | -0.57469900 | -3.43081200 | C            | 4.17739700 | 1.44097900  | 2.07339500  |
| H  | -0.96633500 | -1.46307900 | -5.36923900 | C            | 2.00584500 | 2.69824900  | 3.28475600  |
| H  | -0.27679000 | 0.16912500  | -3.68944000 | H            | 1.00778100 | 0.81594500  | 3.07269400  |
| C  | -2.65966900 | -3.53244000 | -5.00296100 | C            | 4.28016100 | 2.76895100  | 2.46956300  |
| H  | -2.24564500 | -3.45780600 | -6.00588200 | H            | 5.04920700 | 0.95713000  | 1.64482500  |
| C  | -3.69352300 | -3.70005600 | -2.40922500 | C            | 3.18898700 | 3.41537100  | 3.06664800  |
| H  | -4.09361800 | -3.78987600 | -1.40660700 | H            | 1.14844800 | 3.16280600  | 3.75836800  |
| C  | -3.51505600 | -4.55804100 | -4.67195100 | H            | 5.20294500 | 3.32481600  | 2.33485100  |
| C  | -4.02854100 | -4.64218700 | -3.35699400 | O            | 3.38322400 | 4.72147900  | 3.41035400  |
| H  | -3.79104200 | -5.30453100 | -5.41190500 | C            | 2.30635400 | 5.42577400  | 4.00608000  |
| H  | -4.69255300 | -5.45997900 | -3.08964100 | H            | 2.01454900 | 4.98157900  | 4.96736200  |
| P  | -0.76676000 | 0.54873600  | -0.89085700 | H            | 2.66936200 | 6.44128500  | 4.17535900  |
| C  | -2.06693900 | 1.18844600  | 0.27794100  | H            | 1.43027700 | 5.45907500  | 3.34485100  |
| C  | -1.76404800 | 1.29040900  | 1.64033400  | C            | 2.74732700 | -1.64591000 | 3.10913300  |
| C  | -3.27759000 | 1.72543000  | -0.18469600 | H            | 3.69258700 | -1.65527700 | 3.67286800  |
| C  | -2.65433700 | 1.89980100  | 2.52796700  | H            | 1.98032600 | -1.27182200 | 3.78913700  |
| H  | -0.81555800 | 0.89601600  | 1.98937000  | H            | 2.49089300 | -2.67329100 | 2.84953400  |
| C  | -4.17204400 | 2.32572600  | 0.70029300  |              |            |             |             |
| H  | -3.52526400 | 1.67977900  | -1.24050200 | <b>60-L2</b> |            |             |             |
| C  | -3.86293000 | 2.41555500  | 2.06009400  | C            | 3.98695700 | -1.03058800 | -2.33195400 |
| H  | -2.40201300 | 1.97233000  | 3.58333500  | C            | 2.92924300 | -1.64887700 | -2.87260300 |
| H  | -5.11090900 | 2.72531900  | 0.32651700  | C            | 1.85757800 | -2.23218800 | -2.03449200 |
| H  | -4.55873000 | 2.88966400  | 2.74748300  | C            | 1.87794800 | -1.89874600 | -0.58938500 |
| C  | -0.51030700 | 2.16367200  | -1.76880400 | C            | 2.93679500 | -1.17723300 | -0.04338500 |
| C  | 0.36040000  | 3.08238700  | -1.16441700 | C            | 4.20122300 | -0.88136600 | -0.84202500 |
| C  | -1.24563700 | 2.56822300  | -2.89066900 | H            | 4.78974000 | -0.63360900 | -2.95109600 |
| C  | 0.50719400  | 4.36844300  | -1.68146700 | H            | 2.83048900 | -1.80444900 | -3.94423900 |
| H  | 0.92506600  | 2.78839200  | -0.28443800 | H            | 1.25135800 | -2.50568200 | 0.05425000  |
| C  | -1.09266900 | 3.85456300  | -3.41182500 | H            | 3.09337200 | -1.20855500 | 1.03022800  |
| H  | -1.93449900 | 1.88128300  | -3.37164100 | O            | 1.02559400 | -2.99691600 | -2.53121800 |
| C  | -0.21443800 | 4.75710500  | -2.81195200 | O            | 4.76967900 | 0.39707200  | -0.56059000 |
| H  | 1.19221700  | 5.06460900  | -1.20439600 | C            | 5.29073900 | -1.88536200 | -0.40009600 |
| H  | -1.66207400 | 4.14829300  | -4.29006900 | H            | 5.49008500 | -1.75731100 | 0.66874500  |
| H  | -0.09441700 | 5.75695800  | -3.22089600 | H            | 6.21715400 | -1.68459300 | -0.94823900 |
| Rh | 0.96396100  | -0.61442900 | 0.04731900  | H            | 4.97849900 | -2.91646800 | -0.58980200 |
| C  | 3.54933000  | -2.03770800 | -2.54326300 | C            | 3.81982800 | 1.47058000  | -0.69639000 |
| C  | 2.55472300  | -1.29505700 | -3.04214200 | H            | 3.42163400 | 1.46338200  | -1.71306100 |
| C  | 2.24814900  | 0.06364700  | -2.50630300 | H            | 4.41197600 | 2.38234800  | -0.58364000 |
| C  | 2.57367500  | 0.31615700  | -1.09727500 | C            | 2.72522900 | 1.31580700  | 0.34115400  |
| C  | 3.76115700  | -0.47206800 | -0.52216200 | C            | 2.98040900 | 1.71484700  | 1.61816900  |
| C  | 4.43468500  | -1.56104400 | -1.41746100 | C            | 2.12268100 | 1.42613200  | 2.80257800  |
| H  | 3.82112400  | -3.00003100 | -2.97694100 | C            | 2.10419100 | 2.29359300  | 3.91181600  |
| H  | 1.98769500  | -1.60541700 | -3.91671000 | C            | 1.34956000 | 0.25211000  | 2.92296700  |
| H  | 2.63355400  | 1.38409600  | -0.89039700 | C            | 1.35767400 | 2.03117800  | 5.06361800  |
| H  | 4.55386100  | 0.22526600  | -0.23463900 | H            | 2.67865900 | 3.21440300  | 3.88049900  |
| O  | 1.73847900  | 0.89715000  | -3.26930900 | C            | 0.62397500 | -0.04011300 | 4.07144700  |
| O  | 4.72012700  | -2.65941100 | -0.52563100 | H            | 1.31735800 | -0.44602500 | 2.09234800  |
| C  | 5.78486600  | -1.10903800 | -1.98422200 | C            | 0.61154500 | 0.85164900  | 5.15175200  |

|   |             |             |             |                 |             |             |             |
|---|-------------|-------------|-------------|-----------------|-------------|-------------|-------------|
| H | 1.37568300  | 2.74582900  | 5.87941600  | C               | -2.13075000 | -1.00820800 | -2.11972500 |
| H | 0.05772100  | -0.96361400 | 4.15603400  | C               | -1.43497400 | -0.94769100 | -3.33294200 |
| C | -4.97404700 | 2.28554900  | -4.51113600 | C               | -3.47165500 | -1.42568000 | -2.12801800 |
| C | -3.77601600 | 2.31245800  | -3.74745600 | C               | -2.06791800 | -1.27926300 | -4.53295600 |
| C | -3.81423800 | 1.97615600  | -2.35676600 | H               | -0.38990500 | -0.65874500 | -3.33419100 |
| C | -5.07133100 | 1.61239700  | -1.79391300 | C               | -4.10546500 | -1.74994000 | -3.32559700 |
| C | -6.21571600 | 1.59206200  | -2.55919900 | H               | -4.02043300 | -1.50839300 | -1.19470300 |
| C | -6.17138100 | 1.93428400  | -3.93235500 | C               | -3.40404000 | -1.67773300 | -4.53220700 |
| H | -4.92364400 | 2.54623200  | -5.56571700 | H               | -1.51124200 | -1.23370400 | -5.46518700 |
| H | -5.12096600 | 1.34447900  | -0.74479700 | H               | -5.14594100 | -2.06344500 | -3.31682400 |
| H | -7.16213500 | 1.30933800  | -2.10602000 | H               | -3.89646200 | -1.94022100 | -5.46495200 |
| H | -7.08248500 | 1.91602000  | -4.52432200 | C               | -1.71127600 | -2.32221500 | 0.29421700  |
| C | -2.53340900 | 2.67029300  | -4.32144200 | C               | -1.10790400 | -3.50197800 | -0.18134100 |
| H | -2.49728400 | 2.94859900  | -5.37229100 | C               | -2.73552200 | -2.44501900 | 1.24901800  |
| C | -2.60347300 | 1.99949300  | -1.58335600 | C               | -1.47898200 | -4.74882900 | 0.32492900  |
| C | -1.38169900 | 2.66689100  | -3.57224800 | H               | -0.37688600 | -3.45913600 | -0.98398000 |
| C | -1.38524400 | 2.31623300  | -2.19272600 | C               | -3.10374800 | -3.69555100 | 1.75204900  |
| H | -0.45334200 | 2.94807300  | -4.05132400 | H               | -3.26932900 | -1.57189400 | 1.60365800  |
| P | 0.23121500  | 2.29766200  | -1.21754200 | C               | -2.46851900 | -4.85254500 | 1.30321700  |
| C | 1.45295300  | 2.87950400  | -2.49268100 | H               | -0.99512800 | -5.64244700 | -0.06083500 |
| C | 1.76113900  | 2.02447800  | -3.56737200 | H               | -3.89707300 | -3.75821000 | 2.49274600  |
| C | 2.15982700  | 4.08519000  | -2.38246900 | H               | -2.75356400 | -5.82418500 | 1.69817600  |
| C | 2.71436700  | 2.38081400  | -4.51959900 | Rh              | 1.06508000  | 0.20476000  | -0.37552800 |
| H | 1.25993500  | 1.06498500  | -3.64958300 | O               | -0.15253200 | 0.48404800  | 6.22715300  |
| C | 3.13049500  | 4.43383700  | -3.32707500 | C               | -0.15512500 | 1.33163300  | 7.36183200  |
| H | 1.96618800  | 4.75648600  | -1.55398000 | H               | -0.55740200 | 2.32657200  | 7.12573400  |
| C | 3.40583100  | 3.58996200  | -4.40163700 | H               | -0.80134700 | 0.84896300  | 8.09795200  |
| H | 2.92671400  | 1.70757500  | -5.34599100 | H               | 0.85226500  | 1.44627800  | 7.78460400  |
| H | 3.67027200  | 5.37079400  | -3.21681900 | C               | 4.26067700  | 2.48419300  | 1.96801000  |
| H | 4.15737200  | 3.86494200  | -5.13680100 | H               | 4.12873600  | 3.57379900  | 1.89344000  |
| C | -0.03605700 | 3.81396800  | -0.18448600 | H               | 4.57048500  | 2.26860500  | 2.99570400  |
| C | -0.46447200 | 5.02292900  | -0.76194200 | H               | 5.09528200  | 2.20377000  | 1.32488200  |
| C | 0.15814200  | 3.75674100  | 1.19873000  |                 |             |             |             |
| C | -0.66294100 | 6.15380500  | 0.02837200  | <b>61-ts-L2</b> |             |             |             |
| H | -0.64273200 | 5.08155100  | -1.83211900 | C               | 5.79894200  | -1.14463200 | 2.18786700  |
| C | -0.04725700 | 4.88940700  | 1.99143500  | C               | 4.49079700  | -0.62391100 | 1.99635000  |
| H | 0.45991300  | 2.82525900  | 1.65864900  | C               | 4.02183100  | -0.34026800 | 0.67370200  |
| C | -0.45062700 | 6.08990200  | 1.40892800  | C               | 4.90885500  | -0.60699600 | -0.40967800 |
| H | -0.98958600 | 7.08289600  | -0.43186200 | C               | 6.17102400  | -1.11501500 | -0.19487100 |
| H | 0.10741300  | 4.82178100  | 3.06477000  | C               | 6.62717000  | -1.38623600 | 1.11693800  |
| H | -0.60967800 | 6.97127400  | 2.02494700  | H               | 6.13112600  | -1.34965600 | 3.20293000  |
| C | -2.61202300 | 1.40053600  | 2.69715400  | H               | 4.58166900  | -0.41036700 | -1.42340600 |
| C | -3.26936500 | 2.53768700  | 2.16536600  | H               | 6.82342800  | -1.30855800 | -1.04224900 |
| C | -3.26655600 | 2.73271700  | 0.74606300  | H               | 7.62638600  | -1.78385300 | 1.27297200  |
| C | -2.67298500 | 1.73355400  | -0.10974800 | C               | 3.63124200  | -0.36624900 | 3.09021600  |
| C | -2.11709100 | 0.58384500  | 0.44738500  | H               | 3.98711800  | -0.55943800 | 4.09971600  |
| C | -2.04377400 | 0.46947700  | 1.86729100  | C               | 2.69102300  | 0.18447300  | 0.48063300  |
| H | -2.54346500 | 1.27936000  | 3.77542400  | C               | 2.36471400  | 0.12161700  | 2.88849800  |
| H | -1.51898900 | -0.36837500 | 2.30622000  | C               | 1.86214300  | 0.39436000  | 1.58325900  |
| C | -3.89106500 | 3.49604400  | 3.00846700  | H               | 1.73881200  | 0.30978200  | 3.75078700  |
| H | -3.88712800 | 3.32126800  | 4.08184200  | P               | 0.11131800  | 1.02864000  | 1.36607500  |
| C | -3.85632600 | 3.92759500  | 0.24332300  | C               | -0.49840500 | 1.07071800  | 3.12405100  |
| H | -3.83801100 | 4.12085900  | -0.82211800 | C               | -0.86386800 | 2.25233200  | 3.78354700  |
| C | -4.47958300 | 4.62337800  | 2.48316000  | C               | -0.69547400 | -0.15297000 | 3.79205500  |
| C | -4.45033700 | 4.84149400  | 1.08622700  | C               | -1.40124900 | 2.21418000  | 5.07457400  |
| H | -4.95567200 | 5.35004400  | 3.13605600  | H               | -0.73572600 | 3.21095000  | 3.29342300  |
| H | -4.89742800 | 5.74145500  | 0.67250300  | C               | -1.21142000 | -0.18952700 | 5.08617600  |
| P | -1.21169400 | -0.71490600 | -0.53200900 | H               | -0.44559400 | -1.08289100 | 3.28934800  |

|   |             |             |             |                   |             |             |             |
|---|-------------|-------------|-------------|-------------------|-------------|-------------|-------------|
| C | -1.57166200 | 0.99703400  | 5.73211700  | C                 | -3.84918000 | -0.74370500 | -0.02387100 |
| H | -1.68309000 | 3.14293700  | 5.56412200  | C                 | -4.76473700 | -0.95086900 | 1.19732000  |
| H | -1.34507900 | -1.14574300 | 5.58529200  | H                 | -4.74031600 | -2.04542800 | 3.10365800  |
| H | -1.98477000 | 0.96952300  | 6.73686300  | H                 | -3.01289800 | -3.71997800 | 2.48139900  |
| C | 0.46687000  | 2.82276400  | 1.03314500  | H                 | -2.82518500 | -1.97524700 | -1.47440400 |
| C | 1.40367200  | 3.53916000  | 1.79965200  | H                 | -4.33422600 | -0.23040000 | -0.84859000 |
| C | -0.19860500 | 3.48537900  | -0.00493500 | O                 | -2.06262500 | -3.94146000 | 0.08353900  |
| C | 1.65396500  | 4.88607100  | 1.54128800  | O                 | -4.91134800 | 0.25797700  | 1.95008400  |
| H | 1.94044800  | 3.04215500  | 2.60306000  | C                 | -6.17815300 | -1.31256800 | 0.70954000  |
| C | 0.05617900  | 4.83464100  | -0.26758500 | H                 | -6.57681300 | -0.49576000 | 0.09888000  |
| H | -0.91260100 | 2.94711900  | -0.61532300 | H                 | -6.84123600 | -1.45444800 | 1.56954700  |
| C | 0.97873500  | 5.53814500  | 0.50541100  | H                 | -6.16507700 | -2.23345200 | 0.11864400  |
| H | 2.37948300  | 5.42544800  | 2.14510000  | C                 | -3.61779800 | 0.86744700  | 2.09519200  |
| H | -0.46753100 | 5.32969700  | -1.08098700 | H                 | -2.98132500 | 0.22490600  | 2.70851900  |
| H | 1.17729500  | 6.58703500  | 0.30085400  | H                 | -3.78984600 | 1.79595100  | 2.64118900  |
| C | 1.95458500  | 1.08932500  | -3.68024000 | C                 | -3.07136200 | 1.04437400  | 0.69446200  |
| C | 2.76234500  | 1.96318900  | -2.91533600 | C                 | -3.51174700 | 2.11594700  | -0.04162300 |
| C | 2.94462600  | 1.68136600  | -1.52276600 | C                 | -3.42890900 | 2.20106600  | -1.51805000 |
| C | 2.30268100  | 0.53414000  | -0.93031200 | C                 | -4.42466300 | 2.88384200  | -2.24682600 |
| C | 1.44845000  | -0.26123000 | -1.70210200 | C                 | -2.39680800 | 1.60719800  | -2.27822400 |
| C | 1.31516000  | 0.02679200  | -3.09101800 | C                 | -4.41083600 | 2.96834900  | -3.63922200 |
| H | 1.84239200  | 1.26931000  | -4.74707100 | H                 | -5.25450000 | 3.34539400  | -1.72141800 |
| H | 0.70843700  | -0.62016500 | -3.71025700 | C                 | -2.35802500 | 1.69919400  | -3.66373000 |
| C | 3.40355100  | 3.08892000  | -3.49921800 | H                 | -1.60104000 | 1.07795300  | -1.75180500 |
| H | 3.25268400  | 3.27905400  | -4.55932300 | C                 | -3.36660300 | 2.37787100  | -4.36102900 |
| C | 3.76944500  | 2.56903600  | -0.77261400 | H                 | -5.21306000 | 3.49483200  | -4.14414900 |
| H | 3.91077100  | 2.39082300  | 0.28630000  | H                 | -1.53720100 | 1.26636100  | -4.22765700 |
| C | 4.19353300  | 3.92196800  | -2.74240900 | Rh                | -1.42028100 | -0.31073500 | 0.13908900  |
| C | 4.37006700  | 3.65814700  | -1.36310100 | C                 | -4.24611600 | 3.27704800  | 0.62592200  |
| H | 4.67840700  | 4.78194000  | -3.19656700 | H                 | -4.15751900 | 4.19046200  | 0.03092700  |
| H | 4.98445400  | 4.32361000  | -0.76268200 | H                 | -5.31584500 | 3.06421100  | 0.76130900  |
| P | 0.29324700  | -1.52385100 | -0.93139500 | H                 | -3.83741100 | 3.50053600  | 1.61422300  |
| C | 1.39911600  | -2.71354600 | -0.04858700 | O                 | -3.23819800 | 2.41329000  | -5.72035900 |
| C | 0.96663000  | -3.25815200 | 1.16791100  | C                 | -4.22543900 | 3.10204400  | -6.46873400 |
| C | 2.62688400  | -3.13652200 | -0.58192900 | H                 | -3.92691400 | 3.01201000  | -7.51504800 |
| C | 1.74491600  | -4.20334600 | 1.83861700  | H                 | -5.21979000 | 2.65440200  | -6.33692700 |
| H | 0.01035500  | -2.95034500 | 1.57651300  | H                 | -4.27215900 | 4.16499300  | -6.19589000 |
| C | 3.40583200  | -4.07929500 | 0.08897200  |                   |             |             |             |
| H | 2.97782900  | -2.72545600 | -1.52417200 | <b>61-ts-L2-b</b> |             |             |             |
| C | 2.96540500  | -4.61473400 | 1.30166900  | C                 | 5.78554600  | -1.16690100 | 2.19465500  |
| H | 1.39397600  | -4.62061300 | 2.77881000  | C                 | 4.48032200  | -0.63888800 | 2.00325500  |
| H | 4.35866500  | -4.38876700 | -0.33181100 | C                 | 4.01702600  | -0.34071300 | 0.68170700  |
| H | 3.57229700  | -5.34935900 | 1.82461500  | C                 | 4.90680100  | -0.60233000 | -0.40076000 |
| C | -0.26724000 | -2.53644300 | -2.39566700 | C                 | 6.16625800  | -1.11709000 | -0.18604900 |
| C | 0.14729900  | -3.85813700 | -2.60997000 | C                 | 6.61684400  | -1.40190200 | 1.12470200  |
| C | -1.19326100 | -1.98140700 | -3.29851300 | H                 | 6.11292200  | -1.38284400 | 3.20899900  |
| C | -0.32545600 | -4.58953700 | -3.70245200 | H                 | 4.58455100  | -0.39646800 | -1.41414900 |
| H | 0.83021100  | -4.33487300 | -1.91816200 | H                 | 6.82071200  | -1.30580700 | -1.03293600 |
| C | -1.65756600 | -2.70707100 | -4.39548400 | H                 | 7.61386200  | -1.80497600 | 1.28067000  |
| H | -1.56541100 | -0.97397900 | -3.14168900 | C                 | 3.61770700  | -0.39016100 | 3.09673500  |
| C | -1.22267500 | -4.01774800 | -4.60286200 | H                 | 3.96827500  | -0.59818000 | 4.10512500  |
| H | 0.00774300  | -5.61482100 | -3.84072000 | C                 | 2.68882300  | 0.19185800  | 0.48945200  |
| H | -2.36670500 | -2.24847700 | -5.07982800 | C                 | 2.35484600  | 0.10720300  | 2.89586200  |
| H | -1.58895100 | -4.58928100 | -5.45163700 | C                 | 1.85900500  | 0.39893300  | 1.59200000  |
| C | -4.25688900 | -2.03185100 | 2.12776000  | H                 | 1.72516900  | 0.28668500  | 3.75728000  |
| C | -3.31656300 | -2.92628000 | 1.80245600  | P                 | 0.11207000  | 1.04665100  | 1.38483300  |
| C | -2.70091000 | -2.95233300 | 0.45202100  | C                 | -0.49342500 | 1.05501000  | 3.14491200  |
| C | -2.94521700 | -1.78011500 | -0.41436800 | C                 | -0.78377300 | 2.22494100  | 3.85971200  |

|   |             |             |             |              |             |             |             |
|---|-------------|-------------|-------------|--------------|-------------|-------------|-------------|
| C | -0.74844100 | -0.18450700 | 3.76176800  | H            | -1.66275400 | -4.56021300 | -5.41526200 |
| C | -1.30570200 | 2.15897800  | 5.15611500  | C            | -4.24277000 | -1.96162700 | 2.18652700  |
| H | -0.60878000 | 3.19583600  | 3.40983000  | C            | -3.29699100 | -2.85950100 | 1.88684500  |
| C | -1.24844400 | -0.25010400 | 5.06081700  | C            | -2.68262600 | -2.92134100 | 0.53707100  |
| H | -0.56246100 | -1.10169200 | 3.21033200  | C            | -2.93596900 | -1.77756500 | -0.36372300 |
| C | -1.53353500 | 0.92502400  | 5.76303200  | C            | -3.84761400 | -0.73751100 | -0.00373400 |
| H | -1.53036600 | 3.07907200  | 5.68961000  | C            | -4.76095900 | -0.91449800 | 1.22348500  |
| H | -1.42912800 | -1.21855500 | 5.51992900  | H            | -4.72418000 | -1.94858100 | 3.16341500  |
| H | -1.93447000 | 0.87602700  | 6.77190900  | H            | -2.98698000 | -3.62996200 | 2.58929400  |
| C | 0.47136000  | 2.84777000  | 1.09225400  | H            | -2.81576600 | -2.00435300 | -1.41742200 |
| C | 1.46504100  | 3.52699400  | 1.81999600  | H            | -4.33664600 | -0.25190800 | -0.84265700 |
| C | -0.26260300 | 3.55882900  | 0.13492700  | O            | -2.03747900 | -3.91626400 | 0.19636900  |
| C | 1.70838100  | 4.88219000  | 1.59996000  | O            | -4.92098900 | 0.31635400  | 1.93678200  |
| H | 2.05138600  | 2.99478700  | 2.56389400  | C            | -6.17079200 | -1.30558500 | 0.74722900  |
| C | -0.01459100 | 4.91611900  | -0.08992600 | H            | -6.57746700 | -0.51210400 | 0.11164900  |
| H | -1.02940100 | 3.05356100  | -0.43847700 | H            | -6.83259000 | -1.42723900 | 1.61126700  |
| C | 0.96821000  | 5.58101800  | 0.64204900  | H            | -6.14872800 | -2.24405700 | 0.18502000  |
| H | 2.47885700  | 5.39165400  | 2.17331300  | C            | -3.63450300 | 0.94532100  | 2.06487800  |
| H | -0.59191200 | 5.44839300  | -0.84120500 | H            | -2.99676600 | 0.33848100  | 2.71174100  |
| H | 1.16149600  | 6.63616200  | 0.46684500  | H            | -3.82046000 | 1.89690400  | 2.56612200  |
| C | 1.97554400  | 1.07320400  | -3.67930700 | C            | -3.07761700 | 1.07032000  | 0.66258000  |
| C | 2.77823300  | 1.95342000  | -2.91617700 | C            | -3.52879900 | 2.10782600  | -0.11370300 |
| C | 2.94985100  | 1.68285400  | -1.51988300 | C            | -3.40858000 | 2.15349500  | -1.58914400 |
| C | 2.30319900  | 0.54116900  | -0.92266600 | C            | -4.45072000 | 2.71333600  | -2.36897100 |
| C | 1.45087800  | -0.25797800 | -1.69295600 | C            | -2.29993600 | 1.65462400  | -2.29436500 |
| C | 1.32817600  | 0.01773000  | -3.08520300 | C            | -4.39188600 | 2.75736300  | -3.75329700 |
| H | 1.87669100  | 1.24150100  | -4.74961200 | H            | -5.33948700 | 3.10023100  | -1.87998800 |
| H | 0.72447600  | -0.63495800 | -3.70187300 | C            | -2.21475900 | 1.71368400  | -3.68896600 |
| C | 3.42580100  | 3.07323300  | -3.50434100 | H            | -1.47133800 | 1.22723000  | -1.73061700 |
| H | 3.28393500  | 3.25521700  | -4.56717200 | C            | -3.26556200 | 2.26321800  | -4.42959200 |
| C | 3.77219100  | 2.57398900  | -0.77133900 | H            | -5.20678500 | 3.17478600  | -4.33698900 |
| H | 3.90732200  | 2.40186000  | 0.28934600  | H            | -1.31604600 | 1.34916400  | -4.17377100 |
| C | 4.21156100  | 3.91107800  | -2.74841000 | Rh           | -1.41621400 | -0.28619400 | 0.15027100  |
| C | 4.37858600  | 3.65756000  | -1.36595200 | C            | -4.31138200 | 3.26525400  | 0.50563400  |
| H | 4.70100500  | 4.76664300  | -3.20587600 | H            | -4.34537200 | 4.12458200  | -0.16895900 |
| H | 4.99061000  | 4.32629300  | -0.76683700 | H            | -5.34394100 | 2.97842100  | 0.74628300  |
| P | 0.29353500  | -1.51363000 | -0.91397600 | H            | -3.84968100 | 3.60938000  | 1.43572900  |
| C | 1.40909600  | -2.71009500 | -0.05080500 | O            | -3.29094300 | 2.37223100  | -5.79057900 |
| C | 0.99587200  | -3.26272100 | 1.16868900  | C            | -2.18135800 | 1.87742600  | -6.52024200 |
| C | 2.62850200  | -3.12978600 | -0.60598500 | H            | -2.41282200 | 2.04894400  | -7.57333100 |
| C | 1.78460800  | -4.21255100 | 1.82048200  | H            | -1.25645700 | 2.41025900  | -6.26117600 |
| H | 0.04537400  | -2.96154200 | 1.59428900  | H            | -2.03329600 | 0.80208500  | -6.35159200 |
| C | 3.41754000  | -4.07748200 | 0.04575500  |              |             |             |             |
| H | 2.96497300  | -2.71227700 | -1.55069600 | <b>24-L3</b> |             |             |             |
| C | 2.99617400  | -4.62085600 | 1.26167500  | C            | -2.62908500 | -1.90972200 | -1.20158200 |
| H | 1.44810500  | -4.63608100 | 2.76311000  | H            | -2.00330300 | -2.59727100 | -1.76298200 |
| H | 4.36332400  | -4.38459600 | -0.39228700 | C            | -2.90764100 | -2.06454700 | 0.16463800  |
| H | 3.61072600  | -5.35939100 | 1.76994900  | H            | -2.52155600 | -2.88743700 | 0.76161200  |
| C | -0.28616100 | -2.52017000 | -2.37497600 | C            | -3.57001700 | -0.93159700 | -1.89715500 |
| C | 0.11303000  | -3.84584000 | -2.59363200 | C            | -3.30745500 | 0.32204700  | -1.07329900 |
| C | -1.21685100 | -1.95548500 | -3.26720600 | C            | -3.59681000 | 0.18979000  | 0.29955800  |
| C | -0.37878100 | -4.57242600 | -3.68113500 | C            | -4.09886000 | -1.24032400 | 0.65609800  |
| H | 0.79873800  | -4.32912600 | -1.90911900 | H            | -3.21860400 | 1.29489900  | -1.54630300 |
| C | -1.70041400 | -2.67700600 | -4.35862500 | H            | -3.32712700 | -0.79056100 | -2.95302100 |
| H | -1.57819600 | -0.94496000 | -3.10378200 | Rh           | -1.54548200 | -0.41839400 | -0.09052000 |
| C | -1.28048600 | -3.99188400 | -4.57140300 | C            | -5.34724500 | -1.55895500 | -0.22269800 |
| H | -0.05755700 | -5.60101000 | -3.82300300 | C            | -5.06138800 | -1.35903400 | -1.74331800 |
| H | -2.41667800 | -2.21366700 | -5.03271400 | H            | -5.66456600 | -2.58903600 | -0.01596600 |

|    |             |             |             |              |             |             |             |
|----|-------------|-------------|-------------|--------------|-------------|-------------|-------------|
| H  | -6.16822600 | -0.90121800 | 0.08480800  | C            | 3.91238400  | -1.36606800 | 1.16048900  |
| C  | -4.39383600 | -1.47396800 | 2.13580000  | C            | 3.25793100  | -1.61053800 | 2.37896000  |
| H  | -4.70529900 | -2.51358000 | 2.29609800  | C            | 4.92073800  | -2.25585600 | 0.75140200  |
| H  | -3.50685900 | -1.29002900 | 2.75106800  | C            | 3.60215800  | -2.71155500 | 3.16316500  |
| H  | -5.19590200 | -0.82063000 | 2.49452200  | H            | 2.45288800  | -0.95108900 | 2.68874700  |
| C  | -5.34218700 | -2.62727100 | -2.55797300 | C            | 5.26739500  | -3.35560000 | 1.53857700  |
| H  | -6.36528000 | -2.99118800 | -2.41199700 | H            | 5.43451800  | -2.06948100 | -0.18811600 |
| H  | -5.19062600 | -2.43900300 | -3.62714800 | C            | 4.60961600  | -3.58642700 | 2.74784800  |
| H  | -4.66441800 | -3.43000400 | -2.24860500 | H            | 3.07661300  | -2.89087900 | 4.09765500  |
| O  | -5.78322700 | -0.22641300 | -2.26571200 | H            | 6.05015000  | -4.03228500 | 1.20494500  |
| C  | -7.18376700 | -0.35870200 | -2.40458600 | H            | 4.87540700  | -4.44402200 | 3.36046500  |
| H  | -7.67616000 | -0.65916900 | -1.46746700 | O            | 0.33968300  | -1.25161900 | 0.27598400  |
| H  | -7.55860200 | 0.62819800  | -2.69041300 | C            | 0.67952400  | -2.57073900 | -0.07311400 |
| H  | -7.46327200 | -1.07672700 | -3.18854800 | H            | -0.04755200 | -3.27637200 | 0.35757700  |
| C  | -3.91321400 | 1.36709900  | 1.15895400  | H            | 0.70084700  | -2.72957800 | -1.16384100 |
| C  | -3.25843400 | 1.61343600  | 2.37691700  | H            | 1.66886600  | -2.82516500 | 0.32873600  |
| C  | -4.92261800 | 2.25560300  | 0.74939400  |              |             |             |             |
| C  | -3.60331500 | 2.71494500  | 3.16012200  | <b>25-L3</b> |             |             |             |
| H  | -2.45262900 | 0.95502300  | 2.68696500  | C            | -1.67656400 | -1.81976400 | 0.21816300  |
| C  | -5.26993300 | 3.35581500  | 1.53568800  | H            | -2.16419100 | -2.78619400 | 0.12728000  |
| H  | -5.43662800 | 2.06777900  | -0.18974100 | C            | -1.08186600 | -1.36640900 | 1.39739700  |
| C  | -4.61177800 | 3.58843700  | 2.74440900  | H            | -1.06757600 | -1.94352500 | 2.31893900  |
| H  | -3.07747600 | 2.89572000  | 4.09416000  | C            | -1.88339500 | -0.71720400 | -0.81519500 |
| H  | -6.05350300 | 4.03141100  | 1.20174900  | C            | -0.44222700 | -0.26792000 | -0.99792300 |
| H  | -4.87809100 | 4.44639200  | 3.35628200  | C            | 0.17613700  | 0.22195300  | 0.19566000  |
| O  | -0.33959900 | 1.25250700  | 0.27481900  | C            | -0.78218200 | 0.13399300  | 1.41650500  |
| C  | -0.67936700 | 2.57154600  | -0.07471300 | H            | -0.05550100 | -0.00541500 | -1.97795700 |
| H  | 0.04518400  | 3.27762900  | 0.35951300  | H            | -2.32020300 | -1.08549100 | -1.74607600 |
| H  | -0.69641400 | 2.73106300  | -1.16541800 | Rh           | 0.50671200  | -1.87342500 | -0.03048500 |
| H  | -1.67061300 | 2.82463700  | 0.32330000  | C            | -2.08345300 | 0.92719900  | 1.08799500  |
| C  | 2.63012100  | 1.90892200  | -1.20344500 | C            | -2.73405500 | 0.46116800  | -0.25085500 |
| H  | 2.00463500  | 2.59611400  | -1.76562800 | H            | -2.78212800 | 0.80484100  | 1.92510700  |
| C  | 2.90835400  | 2.06495900  | 0.16269600  | H            | -1.83994300 | 1.99394500  | 1.02579700  |
| H  | 2.52228200  | 2.88855200  | 0.75872400  | C            | -0.18220400 | 0.58868200  | 2.74495000  |
| C  | 3.57081600  | 0.92977100  | -1.89782800 | H            | -0.91271400 | 0.45037100  | 3.55132000  |
| C  | 3.30758500  | -0.32298700 | -1.07279200 | H            | 0.71141800  | 0.00851000  | 2.99824500  |
| C  | 3.59665300  | -0.18947400 | 0.29998300  | H            | 0.09843300  | 1.64651200  | 2.71947600  |
| C  | 4.09912700  | 1.24075500  | 0.65524800  | C            | -4.19256300 | 0.02782100  | -0.06555900 |
| H  | 3.21848200  | -1.29624700 | -1.54486800 | H            | -4.79920200 | 0.81450000  | 0.39644000  |
| H  | 3.32809100  | 0.78781400  | -2.95361100 | H            | -4.64212000 | -0.23549300 | -1.02984200 |
| Rh | 1.54561800  | 0.41899000  | -0.09116200 | H            | -4.24148900 | -0.84822200 | 0.58990000  |
| C  | 5.34783400  | 1.55813700  | -0.22356500 | O            | -2.60444000 | 1.46996200  | -1.27159400 |
| C  | 5.06228600  | 1.35681900  | -1.74405900 | C            | -3.39972100 | 2.63227400  | -1.14051100 |
| H  | 5.66540300  | 2.58832200  | -0.01775900 | H            | -3.25809300 | 3.13583900  | -0.17245900 |
| H  | 6.16853500  | 0.90046800  | 0.08476900  | H            | -3.07998000 | 3.31329300  | -1.93406800 |
| C  | 4.39386400  | 1.47583400  | 2.13476800  | H            | -4.47081600 | 2.42422800  | -1.27089800 |
| H  | 4.70570300  | 2.51549700  | 2.29401200  | C            | 1.28780500  | 1.21258300  | 0.13807500  |
| H  | 3.50668100  | 1.29294300  | 2.75004300  | C            | 2.48211500  | 1.05890800  | 0.86046500  |
| H  | 5.19556900  | 0.82257900  | 2.49439100  | C            | 1.12299000  | 2.36626600  | -0.64849600 |
| C  | 5.34370700  | 2.62417700  | -2.55986700 | C            | 3.47915800  | 2.03263000  | 0.80190400  |
| H  | 6.36688500  | 2.98789000  | -2.41401700 | H            | 2.63605300  | 0.15628500  | 1.44420600  |
| H  | 5.19231000  | 2.43495600  | -3.62889800 | C            | 2.11962000  | 3.34192400  | -0.70292900 |
| H  | 4.66614200  | 3.42743200  | -2.25141200 | H            | 0.19879000  | 2.49385300  | -1.20587900 |
| O  | 5.78384900  | 0.22343300  | -2.26512400 | C            | 3.30061900  | 3.17877600  | 0.02304900  |
| C  | 7.18445500  | 0.35512400  | -2.40381000 | H            | 4.40103500  | 1.89163100  | 1.36002200  |
| H  | 7.67673100  | 0.65648200  | -1.46692400 | H            | 1.97288000  | 4.22802700  | -1.31521800 |
| H  | 7.55905700  | -0.63220100 | -2.68844600 | H            | 4.07937800  | 3.93545400  | -0.02175900 |
| H  | 7.46437800  | 1.07218500  | -3.18850200 | O            | 2.22913200  | -2.27987900 | -0.79593900 |

|   |            |             |             |
|---|------------|-------------|-------------|
| C | 3.09918200 | -1.58323800 | -1.63690800 |
| H | 4.04915100 | -2.13590400 | -1.71167000 |
| H | 2.69997700 | -1.47526400 | -2.66027300 |
| H | 3.33087800 | -0.57618300 | -1.25324300 |

**26-L3**

|    |             |             |             |
|----|-------------|-------------|-------------|
| C  | -0.12467300 | -2.09942000 | -0.22665500 |
| H  | 0.57636200  | -2.88759600 | -0.47979600 |
| C  | -0.23734100 | -1.56494800 | 1.05965100  |
| H  | 0.36481500  | -1.90590200 | 1.89708500  |
| C  | -1.28333400 | -1.71741400 | -1.14011900 |
| C  | -1.17343000 | -0.20077300 | -1.09445000 |
| C  | -1.30766500 | 0.35957400  | 0.19583300  |
| C  | -1.50079500 | -0.73135300 | 1.28667200  |
| H  | -1.29957100 | 0.39809600  | -1.99074500 |
| H  | -1.17111100 | -2.10848300 | -2.15361700 |
| Rh | 0.77559800  | -0.12770900 | -0.20353700 |
| C  | -2.75002800 | -1.58656700 | 0.90733300  |
| C  | -2.65707800 | -2.15395900 | -0.54156400 |
| H  | -2.84852500 | -2.39691200 | 1.64028700  |
| H  | -3.64358600 | -0.95898800 | 0.99830700  |
| C  | -1.60526800 | -0.21097000 | 2.71853800  |
| H  | -1.71967700 | -1.05191400 | 3.41307000  |
| H  | -0.70698500 | 0.34342900  | 3.00888000  |
| H  | -2.46712400 | 0.45235100  | 2.84334100  |
| C  | -2.79606500 | -3.68039500 | -0.57895700 |
| H  | -3.72306000 | -4.01980200 | -0.10404600 |
| H  | -2.78409200 | -4.04170400 | -1.61357600 |
| H  | -1.96506700 | -4.14734800 | -0.03955800 |
| O  | -3.60678300 | -1.51435200 | -1.41471200 |
| C  | -4.97314600 | -1.83320900 | -1.23493100 |
| H  | -5.31561000 | -1.66289700 | -0.20334600 |
| H  | -5.53226500 | -1.16817100 | -1.89883500 |
| H  | -5.20167500 | -2.87216700 | -1.51034500 |
| C  | -1.74656600 | 1.77024800  | 0.39380900  |
| C  | -1.05280100 | 2.67340900  | 1.21532600  |
| C  | -2.91332900 | 2.21136200  | -0.25493800 |
| C  | -1.51361000 | 3.97885900  | 1.38296900  |
| H  | -0.12966900 | 2.35839100  | 1.69117600  |
| C  | -3.37565000 | 3.51730700  | -0.08291300 |
| H  | -3.45727300 | 1.51509300  | -0.88781200 |
| C  | -2.67728000 | 4.40482700  | 0.73730800  |
| H  | -0.95670700 | 4.66772000  | 2.01258000  |
| H  | -4.28004200 | 3.84019000  | -0.59217900 |
| H  | -3.03321300 | 5.42316300  | 0.86904800  |
| O  | 1.65737700  | 1.63441900  | -0.84810000 |
| C  | 1.15975300  | 2.55664800  | -1.80517300 |
| H  | 1.69459200  | 3.51010600  | -1.70246900 |
| H  | 1.30139400  | 2.18535800  | -2.82525000 |
| H  | 0.09842600  | 2.73311400  | -1.60816800 |
| C  | 3.12618400  | -0.28900000 | 1.37668600  |
| C  | 3.28539700  | -1.49714500 | 2.04865700  |
| C  | 3.45120400  | -2.68763400 | 1.32105800  |
| C  | 3.44306300  | -2.65364400 | -0.08066700 |
| C  | 3.27918000  | -1.42762200 | -0.73501800 |
| C  | 3.13138500  | -0.20244400 | -0.04357800 |
| H  | 3.05706000  | 0.63174600  | 1.94966600  |
| H  | 3.30903600  | -1.54772300 | 3.13368400  |

|   |            |             |             |
|---|------------|-------------|-------------|
| H | 3.57991200 | -3.55957400 | -0.66166200 |
| H | 3.31940500 | -1.39539400 | -1.82117600 |
| B | 3.16832300 | 1.24416800  | -0.84295400 |
| O | 3.94737800 | 2.17421100  | -0.06439800 |
| H | 4.02151500 | 3.00709300  | -0.55374800 |
| O | 3.54322000 | 1.13999200  | -2.24109400 |
| H | 4.50852000 | 1.17068200  | -2.28784600 |
| O | 3.61478300 | -3.81789900 | 2.06748000  |
| C | 3.83758400 | -5.04560200 | 1.39313500  |
| H | 4.74480000 | -5.00843400 | 0.77615700  |
| H | 3.96225100 | -5.79822500 | 2.17395900  |
| H | 2.98367100 | -5.32028300 | 0.75904400  |

**27-ts-L3**

|    |             |             |             |
|----|-------------|-------------|-------------|
| C  | -0.03232500 | 1.82747300  | -0.55686400 |
| H  | -0.88729100 | 2.34185200  | -0.98335600 |
| C  | 0.03444200  | 1.44742500  | 0.79169000  |
| H  | -0.76424000 | 1.64770800  | 1.50095500  |
| C  | 1.32678800  | 1.81744500  | -1.24610400 |
| C  | 1.75533600  | 0.37267600  | -1.03091700 |
| C  | 1.84247700  | -0.02037500 | 0.30552300  |
| C  | 1.44797100  | 1.12535200  | 1.28155900  |
| H  | 2.20885700  | -0.20453700 | -1.83038100 |
| H  | 1.26747500  | 2.07671200  | -2.30543000 |
| Rh | -0.25466600 | -0.30317500 | -0.41186300 |
| C  | 2.37452100  | 2.34791400  | 0.98555500  |
| C  | 2.33784300  | 2.75983300  | -0.51792200 |
| H  | 2.06406500  | 3.18160100  | 1.62764400  |
| H  | 3.40013000  | 2.08622900  | 1.26912100  |
| C  | 1.48338100  | 0.75868300  | 2.76385800  |
| H  | 1.18281700  | 1.62218800  | 3.36960600  |
| H  | 0.79662100  | -0.06356500 | 2.98957500  |
| H  | 2.48722300  | 0.45622600  | 3.07958800  |
| C  | 1.93412000  | 4.22687000  | -0.70857100 |
| H  | 2.58691800  | 4.90826600  | -0.15181800 |
| H  | 1.97164300  | 4.50082300  | -1.76915700 |
| H  | 0.91324100  | 4.38641600  | -0.34588100 |
| O  | 3.58768500  | 2.46740100  | -1.17141200 |
| C  | 4.70117600  | 3.26961600  | -0.83179300 |
| H  | 4.90134900  | 3.28147700  | 0.25026900  |
| H  | 5.56381600  | 2.82633900  | -1.33718000 |
| H  | 4.59271300  | 4.30786600  | -1.17569700 |
| C  | 2.65561900  | -1.19617000 | 0.72795000  |
| C  | 2.13508600  | -2.23355400 | 1.51943300  |
| C  | 4.00168600  | -1.26972300 | 0.32850700  |
| C  | 2.93631700  | -3.31085400 | 1.89784500  |
| H  | 1.08908700  | -2.20723900 | 1.80986800  |
| C  | 4.80394400  | -2.34637400 | 0.71068600  |
| H  | 4.41198800  | -0.46680100 | -0.27820300 |
| C  | 4.27370200  | -3.37023800 | 1.49747300  |
| H  | 2.51224900  | -4.10988400 | 2.50038800  |
| H  | 5.84255900  | -2.38447500 | 0.39202500  |
| H  | 4.89569000  | -4.21091800 | 1.79340400  |
| O  | -0.54607100 | -2.31394500 | -0.96147500 |
| C  | 0.31481500  | -3.09484900 | -1.79329600 |
| H  | 0.00685600  | -4.14502900 | -1.73648300 |
| H  | 0.26755600  | -2.75676600 | -2.83241700 |
| H  | 1.33093200  | -2.99547200 | -1.40568200 |

|   |             |             |             |
|---|-------------|-------------|-------------|
| C | -2.94762400 | -0.57719100 | 0.95269300  |
| C | -4.10599200 | 0.05961900  | 1.40825400  |
| C | -4.80685200 | 0.90965600  | 0.54118100  |
| C | -4.33824200 | 1.10088000  | -0.76881100 |
| C | -3.18149900 | 0.45746900  | -1.19182800 |
| C | -2.43421300 | -0.40569300 | -0.35242400 |
| H | -2.43781200 | -1.25187000 | 1.63734900  |
| H | -4.45465300 | -0.11626300 | 2.42059100  |
| H | -4.90510300 | 1.75129300  | -1.42962800 |
| H | -2.85020900 | 0.60342600  | -2.21717800 |
| B | -1.95139300 | -2.16734300 | -1.32046100 |
| O | -2.76304100 | -3.10988500 | -0.65813500 |
| H | -3.68685800 | -2.82659500 | -0.63969200 |
| O | -2.13477700 | -1.89948500 | -2.69339800 |
| H | -2.99197700 | -2.23537200 | -2.98672700 |
| O | -5.95146200 | 1.57898500  | 0.86576100  |
| C | -6.47280100 | 1.42620100  | 2.17521800  |
| H | -7.37165600 | 2.04473600  | 2.21459900  |
| H | -6.74239600 | 0.38235100  | 2.38482300  |
| H | -5.76141500 | 1.77175000  | 2.93716700  |

### 28-L3

|    |             |             |             |
|----|-------------|-------------|-------------|
| C  | -0.12259800 | -2.19978100 | -0.09124900 |
| H  | 0.52687200  | -3.05275200 | -0.26222700 |
| C  | -0.19831800 | -1.52984200 | 1.14972400  |
| H  | 0.38369600  | -1.83094600 | 2.01702400  |
| C  | -1.34722200 | -1.94196800 | -0.96323500 |
| C  | -1.37512100 | -0.42246700 | -1.05397500 |
| C  | -1.46940800 | 0.24293400  | 0.15282600  |
| C  | -1.49182800 | -0.73718300 | 1.35790700  |
| H  | -1.53543600 | 0.07748400  | -2.00411200 |
| H  | -1.27193900 | -2.41064100 | -1.94715400 |
| Rh | 0.78878200  | -0.30187100 | -0.26237400 |
| C  | -2.70246200 | -1.70785000 | 1.14675000  |
| C  | -2.65220700 | -2.41335500 | -0.24325100 |
| H  | -2.69885800 | -2.44491100 | 1.95933700  |
| H  | -3.63178800 | -1.13413000 | 1.23575200  |
| C  | -1.55618500 | -0.09052700 | 2.74080400  |
| H  | -1.60374600 | -0.86903900 | 3.51189700  |
| H  | -0.66969800 | 0.51968900  | 2.94049800  |
| H  | -2.43989600 | 0.54669700  | 2.84999300  |
| C  | -2.67804000 | -3.94167500 | -0.12015600 |
| H  | -3.55246300 | -4.29321200 | 0.43861300  |
| H  | -2.69197100 | -4.40696400 | -1.11251100 |
| H  | -1.78885300 | -4.29257300 | 0.41369400  |
| O  | -3.69762900 | -1.93803300 | -1.11268400 |
| C  | -5.02166700 | -2.32878300 | -0.80964300 |
| H  | -5.31544900 | -2.07158000 | 0.21932400  |
| H  | -5.66900300 | -1.78029900 | -1.49987600 |
| H  | -5.18778700 | -3.40504300 | -0.95855800 |
| C  | -1.88435900 | 1.66941100  | 0.23991300  |
| C  | -1.18625300 | 2.62161600  | 1.00436300  |
| C  | -3.02048200 | 2.09410600  | -0.47298700 |
| C  | -1.60594400 | 3.95075200  | 1.04699000  |
| H  | -0.29480800 | 2.32070100  | 1.54596000  |
| C  | -3.44048700 | 3.42485900  | -0.42936000 |
| H  | -3.57891200 | 1.36181700  | -1.04966500 |
| C  | -2.73441700 | 4.35850300  | 0.33073400  |

|   |             |             |             |
|---|-------------|-------------|-------------|
| H | -1.04400200 | 4.67202500  | 1.63445600  |
| H | -4.32239800 | 3.72967500  | -0.98712000 |
| H | -3.05889300 | 5.39509200  | 0.36508900  |
| O | 1.54670300  | 1.73949400  | -1.01678200 |
| C | 0.93072600  | 2.32069400  | -2.17860000 |
| H | -0.10855100 | 2.57409400  | -1.95263300 |
| H | 1.47243600  | 3.21983600  | -2.47795200 |
| H | 0.96647500  | 1.57577000  | -2.97627500 |
| C | 3.13912800  | -1.91820400 | 0.92574500  |
| C | 4.43258400  | -2.43177200 | 0.94981500  |
| C | 5.36848400  | -2.02842900 | -0.01237800 |
| C | 4.98836800  | -1.10001900 | -0.98616800 |
| C | 3.68465900  | -0.58655000 | -0.97889200 |
| C | 2.71114300  | -0.97354100 | -0.03523800 |
| H | 2.44602400  | -2.27288700 | 1.68585400  |
| H | 4.74227900  | -3.15112200 | 1.70332400  |
| H | 5.68860000  | -0.76725800 | -1.74547400 |
| H | 3.42999900  | 0.14402900  | -1.74419500 |
| B | 2.21841300  | 2.54162900  | -0.09557300 |
| O | 2.75447400  | 1.98903800  | 1.02247700  |
| H | 2.70625200  | 1.00947100  | 0.99565400  |
| O | 2.31352300  | 3.88396800  | -0.34525200 |
| H | 2.83568600  | 4.31258800  | 0.34809500  |
| O | 6.61258100  | -2.59426500 | 0.08881500  |
| C | 7.59300300  | -2.21866300 | -0.85993900 |
| H | 8.49535100  | -2.77606400 | -0.59910800 |
| H | 7.29086400  | -2.48011800 | -1.88366200 |
| H | 7.80904800  | -1.14204700 | -0.81745400 |

### 29-L3

|    |             |             |             |
|----|-------------|-------------|-------------|
| C  | 0.44272200  | -1.82665100 | -0.11701100 |
| H  | 1.18367800  | -2.61042100 | -0.24703000 |
| C  | 0.32336300  | -1.07556800 | 1.08882300  |
| H  | 0.96086000  | -1.25238300 | 1.95245600  |
| C  | -0.84212900 | -1.81720200 | -0.93794900 |
| C  | -1.09319600 | -0.33075700 | -1.14872200 |
| C  | -1.21733300 | 0.41323400  | 0.00279100  |
| C  | -1.06133400 | -0.44971100 | 1.28717400  |
| H  | -1.33711900 | 0.06716200  | -2.12849100 |
| H  | -0.74329600 | -2.35518900 | -1.88339600 |
| Rh | 1.09820100  | 0.13569400  | -0.42835100 |
| C  | -2.13093400 | -1.59157200 | 1.21591900  |
| C  | -2.03133200 | -2.40651300 | -0.11060800 |
| H  | -1.99810600 | -2.24413500 | 2.08791700  |
| H  | -3.12737300 | -1.14316200 | 1.29721200  |
| C  | -1.17358000 | 0.30987300  | 2.60835200  |
| H  | -1.08709000 | -0.39029400 | 3.44794600  |
| H  | -0.37877600 | 1.05473300  | 2.71422300  |
| H  | -2.13540800 | 0.82590300  | 2.69594400  |
| C  | -1.82002400 | -3.90418800 | 0.14308300  |
| H  | -2.61311100 | -4.32835600 | 0.76853500  |
| H  | -1.79523200 | -4.45466100 | -0.80437300 |
| H  | -0.87156300 | -4.06979700 | 0.66450900  |
| O  | -3.16979700 | -2.17201000 | -0.95874200 |
| C  | -4.40596200 | -2.72666800 | -0.55564700 |
| H  | -4.69275800 | -2.42858400 | 0.46420900  |
| H  | -5.15622300 | -2.34059700 | -1.25150600 |
| H  | -4.41329000 | -3.82436300 | -0.61089400 |

|   |             |             |             |
|---|-------------|-------------|-------------|
| C | -1.76986900 | 1.79600700  | 0.00266900  |
| C | -1.08913100 | 2.88099100  | 0.58106500  |
| C | -3.01568800 | 2.03649400  | -0.60201300 |
| C | -1.63455900 | 4.16414500  | 0.55248400  |
| H | -0.11604200 | 2.71707000  | 1.03666300  |
| C | -3.56287700 | 3.32041200  | -0.62873600 |
| H | -3.55310900 | 1.20164800  | -1.04368400 |
| C | -2.87468300 | 4.38846100  | -0.05101100 |
| H | -1.08731700 | 4.99128600  | 0.99713700  |
| H | -4.52799300 | 3.48477500  | -1.10110500 |
| H | -3.29899500 | 5.38869900  | -0.07221400 |
| C | 3.78133600  | -1.03731900 | 0.57047200  |
| C | 5.17585200  | -0.99410400 | 0.68690500  |
| C | 5.88825000  | 0.05941400  | 0.10092600  |
| C | 5.19630400  | 1.06004400  | -0.59581300 |
| C | 3.80889600  | 0.99576000  | -0.69787300 |
| C | 3.06093200  | -0.05174900 | -0.11888700 |
| H | 3.25715800  | -1.87026100 | 1.03730900  |
| H | 5.69137900  | -1.77868800 | 1.23098600  |
| H | 5.76491600  | 1.86992900  | -1.04425800 |
| H | 3.30016300  | 1.79265000  | -1.24877300 |
| O | 7.25040900  | 0.20371300  | 0.15025000  |
| C | 8.00054900  | -0.77786600 | 0.84038600  |
| H | 7.87763400  | -1.77392200 | 0.39277200  |
| H | 9.04604600  | -0.47347000 | 0.75587500  |
| H | 7.72472400  | -0.82898200 | 1.90293200  |

### 33-L3

|    |             |             |             |
|----|-------------|-------------|-------------|
| C  | -2.80866000 | 0.55934700  | -0.87884600 |
| H  | -3.57005100 | 0.04426500  | -1.45321200 |
| C  | -2.88384600 | 0.74915000  | 0.50318400  |
| H  | -3.71547500 | 0.38279500  | 1.09787400  |
| C  | -1.79156600 | 1.47888900  | -1.53833800 |
| C  | -0.50674000 | 1.19459800  | -0.77407100 |
| C  | -0.57057300 | 1.41350200  | 0.58576300  |
| C  | -1.98466100 | 1.86073100  | 1.04115900  |
| H  | 0.43569900  | 1.07539800  | -1.29665600 |
| H  | -1.68177300 | 1.29430000  | -2.60902900 |
| Rh | -1.38987600 | -0.79653100 | 0.08299400  |
| C  | -2.31552600 | 3.17447100  | 0.25212700  |
| C  | -2.16846000 | 2.97869700  | -1.28788400 |
| H  | -3.33491400 | 3.48393700  | 0.51288400  |
| H  | -1.64033300 | 3.96905500  | 0.58887700  |
| C  | -2.16151600 | 2.07168900  | 2.54386100  |
| H  | -3.18342600 | 2.41095400  | 2.75172000  |
| H  | -1.99970600 | 1.14314100  | 3.10075000  |
| H  | -1.46964900 | 2.82596200  | 2.93230500  |
| C  | -3.44904400 | 3.34366300  | -2.04733100 |
| H  | -3.77336900 | 4.36814300  | -1.83453100 |
| H  | -3.29538100 | 3.24655800  | -3.12814900 |
| H  | -4.26492700 | 2.67587900  | -1.75214400 |
| O  | -1.02787700 | 3.69296000  | -1.79988700 |
| C  | -1.11858700 | 5.10324400  | -1.86068900 |
| H  | -1.37858400 | 5.55289400  | -0.89064300 |
| H  | -0.12781200 | 5.46147800  | -2.15368500 |
| H  | -1.84733300 | 5.44553700  | -2.60848400 |
| C  | 0.64541200  | 1.62076800  | 1.42039000  |
| C  | 0.88245800  | 0.92255200  | 2.61694200  |

|   |             |             |             |
|---|-------------|-------------|-------------|
| C | 1.58798700  | 2.57952700  | 1.00664800  |
| C | 2.02666900  | 1.17529400  | 3.37315100  |
| H | 0.17916400  | 0.16002900  | 2.93586500  |
| C | 2.73135400  | 2.83495000  | 1.76648000  |
| H | 1.40298100  | 3.13367200  | 0.09052400  |
| C | 2.95379900  | 2.13444000  | 2.95348400  |
| H | 2.19613600  | 0.61969500  | 4.29177900  |
| H | 3.44368400  | 3.58471600  | 1.43202000  |
| H | 3.84011500  | 2.33508100  | 3.54977800  |
| C | -3.02816100 | -3.01442600 | -1.16796200 |
| C | -4.06833600 | -3.93354600 | -1.29676700 |
| C | -4.95159600 | -4.15416600 | -0.23178700 |
| C | -4.77444000 | -3.44410200 | 0.95893700  |
| C | -3.72503800 | -2.51843000 | 1.06728800  |
| C | -2.83652800 | -2.27307400 | 0.01288200  |
| H | -2.35353200 | -2.87550700 | -2.01014000 |
| H | -4.21181400 | -4.49703200 | -2.21484600 |
| H | -5.43587500 | -3.59685100 | 1.80564600  |
| H | -3.61167600 | -1.98848500 | 2.01099200  |
| C | 4.40833900  | -2.28048300 | -1.44685400 |
| C | 5.02317300  | -1.44103700 | -2.29192100 |
| C | 5.48802600  | -0.10060800 | -1.85900000 |
| C | 5.18393700  | 0.27744800  | -0.45837400 |
| C | 4.56938700  | -0.56453100 | 0.38421600  |
| C | 4.17799800  | -1.97718800 | 0.01664600  |
| H | 4.05984000  | -3.25804300 | -1.77705100 |
| H | 5.20504100  | -1.69519600 | -3.33277500 |
| H | 5.47625100  | 1.28071900  | -0.16075100 |
| H | 4.32990600  | -0.26358700 | 1.40277700  |
| O | 6.07376200  | 0.65944000  | -2.62347900 |
| O | 2.80996200  | -2.24245100 | 0.38001700  |
| C | 4.98617600  | -2.97221900 | 0.87533900  |
| H | 4.79365700  | -2.78143200 | 1.93571900  |
| H | 4.66976500  | -3.99473500 | 0.64645100  |
| H | 6.05758300  | -2.87358600 | 0.67912300  |
| C | 1.84086600  | -1.38918100 | -0.23514100 |
| H | 2.00969700  | -0.34367200 | 0.05112700  |
| H | 1.91720000  | -1.44422600 | -1.33193200 |
| C | 0.49806600  | -1.82627200 | 0.18312200  |
| C | -0.34751500 | -2.59691100 | 0.68489000  |
| H | -0.75777300 | -3.50148200 | 1.08545100  |
| O | -5.94075400 | -5.07977900 | -0.45444000 |
| C | -6.85093600 | -5.34086100 | 0.59586000  |
| H | -7.41667900 | -4.44181300 | 0.87875800  |
| H | -7.54387400 | -6.09508400 | 0.21623000  |
| H | -6.34306000 | -5.73453800 | 1.48765500  |

### 34-ts-L3

|   |             |             |             |
|---|-------------|-------------|-------------|
| C | -5.34412400 | -2.08672100 | 0.59713300  |
| C | -6.43642600 | -1.35355500 | 0.34067900  |
| C | -6.81042900 | -0.96860100 | -1.04167500 |
| C | -5.88005800 | -1.39348700 | -2.11551700 |
| C | -4.79002900 | -2.12835800 | -1.85449500 |
| C | -4.42945500 | -2.63301300 | -0.47565100 |
| H | -5.07136100 | -2.35402100 | 1.61705100  |
| H | -7.09596900 | -0.99933000 | 1.12836600  |
| H | -6.13399600 | -1.06891800 | -3.12105400 |
| H | -4.10830500 | -2.42770900 | -2.64938000 |



|    |             |             |             |              |             |             |             |
|----|-------------|-------------|-------------|--------------|-------------|-------------|-------------|
| O  | -7.82525600 | -0.32296100 | -1.28225900 | H            | 2.96313400  | -2.29585000 | 4.55324400  |
| O  | -3.05284100 | -2.34885600 | -0.16910600 | H            | 5.61052300  | -3.90881800 | 1.57034300  |
| C  | -4.49930300 | -4.17464300 | -0.46495200 | H            | 4.71848700  | -3.93175200 | 3.89433200  |
| H  | -3.80743700 | -4.57787000 | -1.21109500 | O            | -3.43583700 | 4.58544100  | 1.05793800  |
| H  | -4.19952800 | -4.54796800 | 0.51934900  | C            | -3.67171400 | 5.04828300  | 2.37648600  |
| H  | -5.51282000 | -4.51967900 | -0.68834800 | H            | -4.29831600 | 5.93655300  | 2.27565200  |
| C  | -2.70587500 | -0.96430500 | -0.12195600 | H            | -4.20122800 | 4.29864700  | 2.97988600  |
| H  | -2.86377500 | -0.48495900 | -1.09794500 | H            | -2.73591200 | 5.32022500  | 2.88340500  |
| H  | -3.33352200 | -0.42834400 | 0.60362400  |              |             |             |             |
| C  | -1.27108900 | -0.87962600 | 0.26781700  | <b>35-L3</b> |             |             |             |
| C  | -0.26434400 | -1.54421400 | 0.69484700  | C            | 5.50832500  | -1.30263200 | -0.75169800 |
| H  | 0.02399300  | -2.52501900 | 1.03812000  | C            | 6.75693700  | -0.81926400 | -0.69123600 |
| Rh | 0.71505400  | 0.10456100  | 0.00885900  | C            | 7.37701700  | -0.42021600 | 0.59498300  |
| C  | -1.06672400 | 1.20031500  | 0.31391000  | C            | 6.52139800  | -0.53693300 | 1.80041500  |
| C  | -1.31292200 | 1.60567800  | 1.63518500  | C            | 5.27361400  | -1.02195800 | 1.73509700  |
| C  | -1.69036400 | 1.94183700  | -0.71509300 | C            | 4.64109500  | -1.54316600 | 0.46398700  |
| C  | -2.07956300 | 2.74059900  | 1.93306700  | H            | 5.05601700  | -1.57919800 | -1.70297000 |
| H  | -0.90118000 | 1.02604800  | 2.45704800  | H            | 7.37188500  | -0.68640400 | -1.57737000 |
| C  | -2.46566500 | 3.05858000  | -0.43591900 | H            | 6.96508900  | -0.19902400 | 2.73320300  |
| H  | -1.55005400 | 1.64834400  | -1.75266100 | H            | 4.64871800  | -1.09257400 | 2.62429800  |
| C  | -2.66000000 | 3.47360100  | 0.89349100  | O            | 8.52841000  | -0.00054700 | 0.65654200  |
| H  | -2.22774600 | 3.02487300  | 2.96926500  | O            | 3.33122600  | -0.99143600 | 0.27673900  |
| H  | -2.93235300 | 3.63496000  | -1.22967200 | C            | 4.38954800  | -3.05954600 | 0.61128600  |
| C  | 1.72119700  | 1.42248600  | -1.51035700 | H            | 3.73255100  | -3.23974600 | 1.46798600  |
| H  | 1.02532400  | 1.96798600  | -2.13901600 | H            | 3.89114900  | -3.43565300 | -0.28768600 |
| C  | 2.09739200  | 1.84780700  | -0.24528300 | H            | 5.32964500  | -3.59914800 | 0.75670600  |
| H  | 1.72901200  | 2.76011900  | 0.21404200  | C            | 3.26556800  | 0.42043400  | 0.11119700  |
| C  | 2.61552200  | 0.32274500  | -2.06515400 | H            | 3.66355600  | 0.92227100  | 1.00920900  |
| C  | 2.52115700  | -0.75663900 | -0.99826900 | H            | 3.90508800  | 0.73987500  | -0.72873500 |
| C  | 2.91018000  | -0.35692600 | 0.27775700  | C            | 1.83234100  | 0.83208000  | -0.14140600 |
| C  | 3.33518500  | 1.14126600  | 0.31158600  | C            | 0.76121000  | 0.00828100  | -0.16396600 |
| H  | 2.43679400  | -1.80376300 | -1.26828100 | H            | 0.89137300  | -1.05986200 | 0.00395500  |
| H  | 2.29108900  | -0.03631600 | -3.04441100 | Rh           | -0.99097600 | 0.95266400  | -0.31939600 |
| C  | 4.50114900  | 1.31440000  | -0.71770100 | C            | 1.55438900  | 2.27121200  | -0.37484000 |
| C  | 4.10201600  | 0.80702600  | -2.13744700 | C            | 0.54128200  | 2.63853400  | -1.29085500 |
| H  | 4.78528800  | 2.37369800  | -0.74560100 | C            | 2.19996100  | 3.31958500  | 0.31725900  |
| H  | 5.37218900  | 0.75447500  | -0.35866700 | C            | 0.15555000  | 3.97835300  | -1.47777900 |
| C  | 3.73544000  | 1.67554600  | 1.68527300  | H            | 0.17119800  | 1.88281200  | -1.99818400 |
| H  | 4.02026700  | 2.73181800  | 1.60656600  | C            | 1.83688000  | 4.64311700  | 0.12561500  |
| H  | 2.90584500  | 1.60525200  | 2.39651200  | H            | 2.98267300  | 3.09096200  | 1.03481700  |
| H  | 4.58544400  | 1.12524900  | 2.10120100  | C            | 0.80124200  | 4.98670600  | -0.76394800 |
| C  | 4.26231800  | 1.89083500  | -3.21022900 | H            | -0.61840400 | 4.20704400  | -2.20172900 |
| H  | 5.27984800  | 2.29616400  | -3.23597100 | H            | 2.33555100  | 5.44370100  | 0.66401200  |
| H  | 4.02519900  | 1.48765200  | -4.20161800 | C            | -3.03069600 | 1.91437600  | 0.37380200  |
| H  | 3.58458200  | 2.72579300  | -3.00450200 | H            | -2.91979700 | 2.96149200  | 0.63725200  |
| O  | 4.82111200  | -0.39131200 | -2.48917900 | C            | -3.21649300 | 1.46525900  | -0.90650500 |
| C  | 6.19942300  | -0.26037600 | -2.77565800 | H            | -3.28400300 | 2.11854400  | -1.77225400 |
| H  | 6.75854800  | 0.21989600  | -1.95856200 | C            | -3.18675700 | 0.82524700  | 1.42750900  |
| H  | 6.58336100  | -1.27615500 | -2.90594700 | C            | -2.15533200 | -0.21070500 | 0.99358700  |
| H  | 6.38516400  | 0.30251900  | -3.70118100 | C            | -2.34681400 | -0.70675200 | -0.32670400 |
| C  | 3.37343900  | -1.33772700 | 1.30171800  | C            | -3.56004100 | -0.02019500 | -1.02210700 |
| C  | 2.88260300  | -1.36164400 | 2.61754800  | H            | -1.62267800 | -0.79314400 | 1.73851100  |
| C  | 4.36457600  | -2.26832000 | 0.94364100  | H            | -3.00454700 | 1.18887400  | 2.44138900  |
| C  | 3.36319500  | -2.28801400 | 3.54245700  | C            | -4.82155300 | -0.29063500 | -0.13583600 |
| H  | 2.10012000  | -0.66529700 | 2.90314100  | C            | -4.61336500 | 0.18901300  | 1.33413400  |
| C  | 4.84569400  | -3.19641500 | 1.86930000  | H            | -5.68382400 | 0.20977900  | -0.59362500 |
| H  | 4.75861600  | -2.24753600 | -0.06885800 | H            | -5.02964300 | -1.36634100 | -0.14521500 |
| C  | 4.34690000  | -3.20920600 | 3.17242600  | C            | -3.80647700 | -0.44163000 | -2.46972500 |

|   |             |             |             |   |             |             |             |
|---|-------------|-------------|-------------|---|-------------|-------------|-------------|
| H | -4.66185300 | 0.10863600  | -2.88106400 | C | -4.64206500 | -2.60555900 | -0.89824500 |
| H | -2.93485900 | -0.22873800 | -3.09825700 | H | -3.50903600 | -1.36363000 | -2.21681300 |
| H | -4.02312200 | -1.51145800 | -2.54720700 | C | -4.69225100 | -3.26911300 | 0.34070900  |
| C | -5.68270700 | 1.19680400  | 1.77414400  | H | -3.59849000 | -3.70539200 | 2.15953000  |
| H | -6.69652800 | 0.80087700  | 1.64847100  | H | -5.49707600 | -2.68910300 | -1.56331900 |
| H | -5.54469900 | 1.46737700  | 2.82734900  | C | -2.58799300 | 1.52752000  | -0.88543400 |
| H | -5.61252300 | 2.10742400  | 1.17032900  | H | -3.43305900 | 1.17878300  | -1.46971500 |
| O | -4.53930700 | -0.92532300 | 2.24385400  | C | -2.50279900 | 1.38078100  | 0.49075800  |
| C | -5.73792800 | -1.63039300 | 2.50066300  | H | -3.27520000 | 0.90875400  | 1.09025900  |
| H | -6.22410800 | -1.98762400 | 1.58053000  | C | -1.56398900 | 2.50228700  | -1.44875500 |
| H | -5.45972300 | -2.49884000 | 3.10424800  | C | -0.24730300 | 1.91229400  | -0.96884900 |
| H | -6.46449500 | -1.03121700 | 3.06724300  | C | -0.12883800 | 1.77645400  | 0.41323800  |
| C | -1.93925800 | -2.09231100 | -0.70470700 | C | -1.42078600 | 2.23993800  | 1.14975500  |
| C | -1.20750500 | -2.37379000 | -1.86959600 | H | 0.61682800  | 1.87465400  | -1.62376000 |
| C | -2.32272400 | -3.16636100 | 0.11732400  | H | -1.60654700 | 2.58164700  | -2.53736200 |
| C | -0.87304600 | -3.68546900 | -2.20412300 | C | -1.66665200 | 3.73248200  | 0.74700500  |
| H | -0.87541800 | -1.54992300 | -2.49390600 | C | -1.73132200 | 3.91550500  | -0.80037300 |
| C | -1.98865200 | -4.48020400 | -0.21771500 | H | -2.59605400 | 4.07143400  | 1.22124300  |
| H | -2.89289100 | -2.95880300 | 1.01883600  | H | -0.85325500 | 4.34271300  | 1.15563800  |
| C | -1.26377300 | -4.74468500 | -1.38039600 | C | -1.41029700 | 2.08593800  | 2.66931200  |
| H | -0.29780400 | -3.88064500 | -3.10569600 | H | -2.35095500 | 2.46523800  | 3.08667600  |
| H | -2.29432100 | -5.29617100 | 0.43253500  | H | -1.31639400 | 1.03584600  | 2.96448700  |
| H | -1.00005400 | -5.76640300 | -1.64113000 | H | -0.58734600 | 2.64362400  | 3.12760700  |
| O | 0.52782300  | 6.32107100  | -0.86533800 | C | -3.04395800 | 4.56424600  | -1.25529400 |
| C | -0.50663500 | 6.72388800  | -1.74612300 | H | -3.21959300 | 5.52674600  | -0.76211400 |
| H | -0.56689500 | 7.81060800  | -1.66295600 | H | -3.03603900 | 4.72775300  | -2.33915200 |
| H | -0.28099700 | 6.45269200  | -2.78644500 | H | -3.88918200 | 3.91345700  | -1.00872600 |
| H | -1.47261300 | 6.28417000  | -1.46231300 | O | -0.58802800 | 4.64009900  | -1.29325900 |

### 36-ts-L3

|    |             |             |             |
|----|-------------|-------------|-------------|
| C  | 4.67885500  | -1.40568000 | -1.66204100 |
| C  | 5.55309200  | -0.77167700 | -0.86808500 |
| C  | 5.80740000  | -1.21434000 | 0.52342600  |
| C  | 5.04322000  | -2.39705100 | 0.98620700  |
| C  | 4.16740900  | -3.02598700 | 0.18982500  |
| C  | 3.90185000  | -2.63439800 | -1.24679300 |
| H  | 4.48648200  | -1.05726200 | -2.67585800 |
| H  | 6.10507000  | 0.10463900  | -1.19693500 |
| H  | 5.22476400  | -2.71026800 | 2.01094500  |
| H  | 3.59344800  | -3.87926300 | 0.54834500  |
| O  | 6.59577600  | -0.62531300 | 1.25742700  |
| O  | 2.49081600  | -2.44373100 | -1.46104800 |
| C  | 4.26663700  | -3.81116900 | -2.17322200 |
| H  | 3.66924100  | -4.68788000 | -1.90368000 |
| H  | 4.03899900  | -3.54621100 | -3.21055200 |
| H  | 5.32880100  | -4.05949200 | -2.08968900 |
| C  | 1.91032600  | -1.34975900 | -0.73582300 |
| H  | 2.22147100  | -1.38210500 | 0.31788700  |
| H  | 2.27077600  | -0.39031800 | -1.13218500 |
| C  | 0.43977600  | -1.40084800 | -0.81654100 |
| C  | -0.56874200 | -2.05858400 | -1.25400300 |
| H  | -0.89782200 | -2.89097100 | -1.85097100 |
| Rh | -1.09402100 | -0.09061200 | -0.43780600 |
| C  | -2.41641800 | -1.74439600 | -0.38378300 |
| C  | -2.46858900 | -2.44872400 | 0.82689400  |
| C  | -3.52404700 | -1.86344800 | -1.25131000 |
| C  | -3.59812000 | -3.18866100 | 1.20573200  |
| H  | -1.61261600 | -2.43165000 | 1.49614700  |

|   |             |             |             |
|---|-------------|-------------|-------------|
| C | -4.64206500 | -2.60555900 | -0.89824500 |
| H | -3.50903600 | -1.36363000 | -2.21681300 |
| C | -4.69225100 | -3.26911300 | 0.34070900  |
| H | -3.59849000 | -3.70539200 | 2.15953000  |
| H | -5.49707600 | -2.68910300 | -1.56331900 |
| C | -2.58799300 | 1.52752000  | -0.88543400 |
| H | -3.43305900 | 1.17878300  | -1.46971500 |
| C | -2.50279900 | 1.38078100  | 0.49075800  |
| H | -3.27520000 | 0.90875400  | 1.09025900  |
| C | -1.56398900 | 2.50228700  | -1.44875500 |
| C | -0.24730300 | 1.91229400  | -0.96884900 |
| C | -0.12883800 | 1.77645400  | 0.41323800  |
| C | -1.42078600 | 2.23993800  | 1.14975500  |
| H | 0.61682800  | 1.87465400  | -1.62376000 |
| H | -1.60654700 | 2.58164700  | -2.53736200 |
| C | -1.66665200 | 3.73248200  | 0.74700500  |
| C | -1.73132200 | 3.91550500  | -0.80037300 |
| H | -2.59605400 | 4.07143400  | 1.22124300  |
| H | -0.85325500 | 4.34271300  | 1.15563800  |
| C | -1.41029700 | 2.08593800  | 2.66931200  |
| H | -2.35095500 | 2.46523800  | 3.08667600  |
| H | -1.31639400 | 1.03584600  | 2.96448700  |
| H | -0.58734600 | 2.64362400  | 3.12760700  |
| C | -3.04395800 | 4.56424600  | -1.25529400 |
| H | -3.21959300 | 5.52674600  | -0.76211400 |
| H | -3.03603900 | 4.72775300  | -2.33915200 |
| H | -3.88918200 | 3.91345700  | -1.00872600 |
| O | -0.58802800 | 4.64009900  | -1.29325900 |
| C | -0.51358600 | 6.01887800  | -0.98988100 |
| H | -0.58339900 | 6.21949700  | 0.08973900  |
| H | 0.46503000  | 6.35799400  | -1.34118600 |
| H | -1.28915500 | 6.60515200  | -1.50259500 |
| C | 1.20300900  | 1.69593000  | 1.07879700  |
| C | 1.49812000  | 0.76481400  | 2.08996400  |
| C | 2.21920100  | 2.58250400  | 0.67841700  |
| C | 2.76854900  | 0.70801000  | 2.66284400  |
| H | 0.73368200  | 0.05890000  | 2.39958000  |
| C | 3.49278300  | 2.52082100  | 1.24752100  |
| H | 1.99527800  | 3.32534300  | -0.08221400 |
| C | 3.77576500  | 1.57940700  | 2.23823100  |
| H | 2.97859900  | -0.02983700 | 3.43289600  |
| H | 4.26537800  | 3.20899800  | 0.91423300  |
| H | 4.77220900  | 1.51371600  | 2.66520800  |
| O | -5.83970600 | -3.96963800 | 0.59109200  |
| C | -5.94481700 | -4.65832400 | 1.82448700  |
| H | -5.87855300 | -3.97137200 | 2.67925300  |
| H | -6.92734600 | -5.13457700 | 1.82099900  |
| H | -5.16935200 | -5.42988600 | 1.92558200  |

### 37-L3

|   |             |             |             |
|---|-------------|-------------|-------------|
| C | -4.15408200 | 0.54974800  | -1.81131100 |
| C | -4.82369200 | -0.55781600 | -1.46296200 |
| C | -5.43087300 | -0.71267600 | -0.12019900 |
| C | -5.24807600 | 0.41986800  | 0.81723300  |
| C | -4.57679600 | 1.52512600  | 0.46483100  |
| C | -3.99453400 | 1.75542100  | -0.91204500 |
| H | -3.69357600 | 0.64213200  | -2.79404000 |
| H | -4.93969100 | -1.40190100 | -2.13752900 |

|    |             |             |             |              |             |             |             |
|----|-------------|-------------|-------------|--------------|-------------|-------------|-------------|
| H  | -5.67292700 | 0.29037600  | 1.80903200  | H            | -0.80992500 | -3.07039600 | -0.72816300 |
| H  | -4.42555100 | 2.34082500  | 1.17040400  | C            | -3.01840900 | -2.67103500 | 1.83412200  |
| O  | -6.03653600 | -1.73104000 | 0.20340400  | H            | -2.69928000 | -1.38197400 | 3.53473900  |
| O  | -2.62040200 | 2.15437700  | -0.82412200 | H            | -3.04587700 | -3.84627800 | 0.02883700  |
| C  | -4.69899000 | 2.96586000  | -1.56113400 | H            | -4.00183400 | -2.99949100 | 2.15693300  |
| H  | -4.55439600 | 3.85182300  | -0.93454700 | O            | 5.25320500  | 4.80578300  | 0.59615700  |
| H  | -4.25597900 | 3.16351800  | -2.54248400 | C            | 6.07690000  | 4.23830700  | 1.59913100  |
| H  | -5.77038400 | 2.77950100  | -1.67987800 | H            | 7.04474500  | 4.73566300  | 1.51187700  |
| C  | -1.71742400 | 1.17738200  | -0.27781700 | H            | 5.66965400  | 4.41338100  | 2.60432400  |
| H  | -2.11365600 | 0.79267600  | 0.67306200  | H            | 6.20990800  | 3.15779600  | 1.45001500  |
| H  | -1.65766400 | 0.31200900  | -0.95341000 |              |             |             |             |
| C  | -0.35717700 | 1.76020400  | -0.05558300 | <b>38-L3</b> |             |             |             |
| C  | -0.09136500 | 3.07638300  | -0.22040800 | C            | 3.75765600  | -2.95984100 | -2.61609800 |
| H  | -0.82949800 | 3.79098700  | -0.58604400 | C            | 4.43933400  | -2.21721600 | -3.49957000 |
| Rh | 1.38291200  | 0.75570800  | 0.21144000  | C            | 5.44203700  | -1.21486400 | -3.06519100 |
| C  | 1.27737400  | 3.55660600  | 0.03684900  | C            | 5.59947100  | -1.03669900 | -1.60240200 |
| C  | 2.05851800  | 2.98170700  | 1.06484600  | C            | 4.91230700  | -1.77798300 | -0.72163000 |
| C  | 1.88541900  | 4.56793900  | -0.74273100 | C            | 3.97622400  | -2.89750300 | -1.12066400 |
| C  | 3.39880000  | 3.35819500  | 1.27965500  | H            | 3.01484200  | -3.68604200 | -2.94340700 |
| H  | 1.56173900  | 2.35735900  | 1.81873300  | H            | 4.28828400  | -2.30547600 | -4.57227500 |
| C  | 3.19619700  | 4.95419100  | -0.52690300 | H            | 6.29156300  | -0.25959400 | -1.28925200 |
| H  | 1.31091800  | 5.03965700  | -1.53594000 | H            | 5.01538000  | -1.61810900 | 0.35051400  |
| C  | 3.97254400  | 4.34245000  | 0.47925100  | O            | 6.08977900  | -0.55553000 | -3.87298200 |
| H  | 3.95203800  | 2.89859300  | 2.09094000  | O            | 2.72872400  | -2.80258000 | -0.42396500 |
| H  | 3.65920300  | 5.73205800  | -1.12707600 | C            | 4.57047700  | -4.24167100 | -0.64456600 |
| C  | 3.30002100  | -0.38172200 | -0.47197000 | H            | 4.69826800  | -4.21865500 | 0.44230800  |
| H  | 4.05727700  | 0.30203500  | -0.84260500 | H            | 3.88009600  | -5.05416300 | -0.89285900 |
| C  | 3.12164500  | -0.67452400 | 0.85570300  | H            | 5.53762000  | -4.43241700 | -1.11837900 |
| H  | 3.73341500  | -0.25950500 | 1.65194100  | C            | 1.97335900  | -1.60576900 | -0.65258900 |
| C  | 2.47206100  | -1.25644600 | -1.40424000 | H            | 2.61380800  | -0.73140500 | -0.47169500 |
| C  | 1.05259600  | -0.99230200 | -0.91482700 | H            | 1.66120700  | -1.55955000 | -1.70787900 |
| C  | 0.83715500  | -1.31521500 | 0.45584400  | C            | 0.76790700  | -1.53354100 | 0.24297800  |
| C  | 2.14681900  | -1.81766100 | 1.13326300  | C            | 0.48302900  | -2.52669900 | 1.11290500  |
| H  | 0.23141700  | -0.97581300 | -1.62389300 | H            | 1.14241100  | -3.39446000 | 1.12475400  |
| H  | 2.60113300  | -0.99239900 | -2.45629400 | Rh           | -0.40660200 | 0.08152500  | 0.07698200  |
| C  | 2.62714400  | -3.07495300 | 0.33428700  | C            | -0.63620000 | -2.58056300 | 2.05797600  |
| C  | 2.81041100  | -2.76686400 | -1.18325700 | C            | -1.34137300 | -1.43675900 | 2.49315800  |
| H  | 3.56443600  | -3.43345600 | 0.77742400  | C            | -1.06286900 | -3.81267400 | 2.58414700  |
| H  | 1.88429000  | -3.87031100 | 0.46077800  | C            | -2.42807100 | -1.51967300 | 3.35546100  |
| C  | 2.04592000  | -2.13101400 | 2.62528600  | H            | -0.99782700 | -0.44272700 | 2.18679200  |
| H  | 3.01945900  | -2.46983900 | 3.00074600  | C            | -2.14635900 | -3.91747900 | 3.45829900  |
| H  | 1.75542200  | -1.24533900 | 3.20039700  | H            | -0.53955000 | -4.71865300 | 2.28739900  |
| H  | 1.31315500  | -2.91841400 | 2.82563900  | C            | -2.84435100 | -2.76599500 | 3.84492900  |
| C  | 4.23037100  | -3.07882800 | -1.67135700 | H            | -2.95660900 | -0.62987000 | 3.68493800  |
| H  | 4.51716100  | -4.11597700 | -1.46520100 | H            | -2.43557900 | -4.89497000 | 3.82818900  |
| H  | 4.31300600  | -2.90484900 | -2.75036500 | C            | -1.27440400 | 2.38358400  | -0.57161400 |
| H  | 4.95285200  | -2.43433200 | -1.15978300 | H            | -2.13849400 | 2.26127800  | -1.21557800 |
| O  | 1.82031700  | -3.44261100 | -1.98134400 | C            | -1.32591800 | 2.33757200  | 0.78038100  |
| C  | 1.93780700  | -4.84610400 | -2.11001500 | H            | -2.24446200 | 2.19687500  | 1.34453400  |
| H  | 1.97028000  | -5.35966400 | -1.13750500 | C            | 0.10782700  | 2.69206800  | -1.11777600 |
| H  | 1.04554700  | -5.18012100 | -2.64673500 | C            | 1.01572000  | 1.63581700  | -0.50230400 |
| H  | 2.82349400  | -5.14193800 | -2.68951000 | C            | 1.00077400  | 1.59318400  | 0.90775700  |
| C  | -0.49544400 | -1.76459300 | 0.95344200  | C            | -0.00596300 | 2.64089200  | 1.48754400  |
| C  | -1.04303500 | -1.30838400 | 2.16461400  | H            | 1.87337700  | 1.28842800  | -1.06754900 |
| C  | -1.23284100 | -2.69519200 | 0.19969300  | H            | 0.14565800  | 2.68539800  | -2.20951200 |
| C  | -2.28901200 | -1.75776000 | 2.60080200  | C            | 0.47363700  | 4.04440200  | 0.97832700  |
| H  | -0.49946000 | -0.56943300 | 2.74560900  | C            | 0.57352600  | 4.09006100  | -0.57655300 |
| C  | -2.48378700 | -3.13917800 | 0.63298500  | H            | -0.21727400 | 4.81067600  | 1.35004700  |

|                 |             |             |             |    |             |             |             |
|-----------------|-------------|-------------|-------------|----|-------------|-------------|-------------|
| H               | 1.45575800  | 4.25127400  | 1.41673700  | C  | 4.66731100  | 0.79224000  | 1.94155900  |
| C               | -0.15175600 | 2.64005400  | 3.00933900  | C  | 3.70707800  | 1.15150000  | 3.05394600  |
| H               | -0.87310300 | 3.40611700  | 3.31867100  | H  | 2.79442700  | 0.20609900  | 4.82754500  |
| H               | -0.51064400 | 1.67389500  | 3.38112700  | H  | 4.17828800  | -1.85663300 | 4.81017700  |
| H               | 0.80115500  | 2.85304400  | 3.50262800  | H  | 6.12110600  | -0.53796100 | 1.13986100  |
| C               | -0.27632900 | 5.21294700  | -1.18368000 | H  | 4.73452500  | 1.51735500  | 1.13200900  |
| H               | -0.01262300 | 6.19259000  | -0.77068800 | O  | 6.01828300  | -2.33885700 | 3.02739100  |
| H               | -0.14424400 | 5.24905300  | -2.27114000 | O  | 2.43303100  | 1.55078600  | 2.52716400  |
| H               | -1.33604700 | 5.04419300  | -0.96715400 | C  | 4.22543500  | 2.41210200  | 3.77974000  |
| O               | 1.94115400  | 4.17302400  | -1.01741200 | H  | 4.31315800  | 3.23627700  | 3.06457000  |
| C               | 2.61752200  | 5.39901600  | -0.81066200 | H  | 3.51381300  | 2.70590800  | 4.55800100  |
| H               | 2.59674400  | 5.72123200  | 0.24104900  | H  | 5.20188700  | 2.22617900  | 4.23588300  |
| H               | 3.65771100  | 5.22586500  | -1.09940400 | C  | 1.73425900  | 0.56079300  | 1.75726200  |
| H               | 2.21429300  | 6.21009900  | -1.43228400 | H  | 2.44406300  | 0.04619100  | 1.09559800  |
| C               | 2.22488000  | 1.21609700  | 1.68048400  | H  | 1.31346500  | -0.20002100 | 2.43037100  |
| C               | 2.19221400  | 0.35516700  | 2.79092000  | C  | 0.64023600  | 1.17906600  | 0.91529400  |
| C               | 3.46666900  | 1.75918100  | 1.30074800  | C  | 0.68075900  | 2.51397800  | 0.65303000  |
| C               | 3.35705100  | 0.04507800  | 3.49193000  | H  | 1.51005700  | 3.05299100  | 1.11244000  |
| H               | 1.25303500  | -0.09734700 | 3.09034900  | Rh | -0.48144800 | -0.21027100 | -0.18211600 |
| C               | 4.63407700  | 1.44667800  | 2.00086000  | C  | -0.22875500 | 3.38093400  | -0.09519900 |
| H               | 3.50331900  | 2.44024500  | 0.45517300  | C  | -1.13004700 | 2.95101500  | -1.09498000 |
| C               | 4.58389600  | 0.58769700  | 3.09985100  | C  | -0.20598700 | 4.76171400  | 0.18084600  |
| H               | 3.30693400  | -0.63145200 | 4.34114600  | C  | -1.98272300 | 3.83875200  | -1.73827100 |
| H               | 5.58093600  | 1.88061300  | 1.68884400  | H  | -1.13867900 | 1.90217400  | -1.37888800 |
| H               | 5.49037900  | 0.34451900  | 3.64820000  | C  | -1.05241200 | 5.66662800  | -0.45670300 |
| C               | -6.10164700 | -1.16446000 | -0.63190400 | H  | 0.48604500  | 5.13466200  | 0.93249200  |
| C               | -6.52453300 | 0.05807700  | -0.28027600 | C  | -1.95748600 | 5.20480300  | -1.42168400 |
| C               | -6.07768500 | 1.27413300  | -1.00196600 | H  | -2.66490800 | 3.50112800  | -2.51315200 |
| C               | -5.11968100 | 1.06172700  | -2.11185300 | H  | -0.99842400 | 6.71815200  | -0.19791700 |
| C               | -4.69059800 | -0.16197200 | -2.45463100 | C  | -1.28245600 | -2.19032100 | -0.98695600 |
| C               | -5.18160300 | -1.43314800 | -1.80136800 | H  | -2.17046300 | -2.52405600 | -0.46107200 |
| H               | -6.42335300 | -2.04993300 | -0.08596100 | C  | -1.29937900 | -1.26895300 | -2.01496800 |
| H               | -7.20477800 | 0.21970800  | 0.55166900  | H  | -2.20995700 | -0.81383600 | -2.39514000 |
| H               | -4.77977800 | 1.95815100  | -2.62424400 | C  | 0.04755300  | -2.91175600 | -0.84967600 |
| H               | -3.97639100 | -0.30109500 | -3.26279200 | C  | 1.03611300  | -1.76990000 | -0.68216700 |
| O               | -6.46761900 | 2.39419900  | -0.68664600 | C  | 1.06028500  | -0.84356300 | -1.72819000 |
| O               | -4.09016800 | -2.28108600 | -1.39573000 | C  | 0.00230000  | -1.18898000 | -2.81704100 |
| C               | -5.93109900 | -2.28040100 | -2.85143000 | H  | 1.86228100  | -1.86414200 | 0.01311200  |
| H               | -5.25800700 | -2.51398600 | -3.68222500 | H  | 0.06810500  | -3.60548300 | -0.00647900 |
| H               | -6.25676000 | -3.22157100 | -2.39748600 | C  | 0.32892800  | -2.62912500 | -3.33840500 |
| H               | -6.80373100 | -1.74316400 | -3.23366700 | C  | 0.39510700  | -3.66731200 | -2.17667000 |
| C               | -3.19969700 | -1.75704000 | -0.40213400 | H  | -0.43331300 | -2.91383300 | -4.07408600 |
| H               | -3.73713300 | -1.09635100 | 0.28921800  | H  | 1.29094200  | -2.60090900 | -3.86192500 |
| H               | -2.85846200 | -2.61976100 | 0.17801700  | C  | -0.09794400 | -0.20232700 | -3.97940600 |
| C               | -2.02203000 | -1.06742200 | -0.96918000 | H  | -0.85876000 | -0.54263600 | -4.69253200 |
| C               | -1.18842000 | -0.66119800 | -1.80437900 | H  | -0.38456200 | 0.79735400  | -3.63662700 |
| H               | -0.71883200 | -0.53913800 | -2.76197300 | H  | 0.85207600  | -0.11409600 | -4.51539700 |
| O               | -3.91813800 | -2.74775500 | 4.69202700  | C  | -0.56087600 | -4.84648000 | -2.39284500 |
| C               | -4.35371900 | -3.97772600 | 5.24418800  | H  | -0.38099700 | -5.34955200 | -3.34936900 |
| H               | -5.20172700 | -3.73526500 | 5.88774600  | H  | -0.45174700 | -5.58283100 | -1.58857100 |
| H               | -4.68073400 | -4.67957400 | 4.46475700  | H  | -1.59838000 | -4.49654400 | -2.40016800 |
| H               | -3.56723100 | -4.45315300 | 5.84591600  | O  | 1.74378800  | -4.11588300 | -1.94882900 |
|                 |             |             |             | C  | 2.31452800  | -4.97426500 | -2.91750700 |
|                 |             |             |             | H  | 2.28687700  | -4.54620600 | -3.93087400 |
|                 |             |             |             | H  | 3.36003500  | -5.10985500 | -2.62758100 |
|                 |             |             |             | H  | 1.82935300  | -5.95978100 | -2.94261100 |
|                 |             |             |             | C  | 2.28711400  | -0.05011800 | -2.03173400 |
|                 |             |             |             | C  | 2.26365300  | 1.32273700  | -2.33054700 |
| <b>39-ts-L3</b> |             |             |             |    |             |             |             |
| C               | 3.54787000  | 0.03383300  | 4.06007500  |    |             |             |             |
| C               | 4.29024600  | -1.08194200 | 4.05623200  |    |             |             |             |
| C               | 5.31258900  | -1.33514600 | 3.01204800  |    |             |             |             |
| C               | 5.41645000  | -0.31952100 | 1.93753500  |    |             |             |             |

|              |             |             |             |    |             |             |             |
|--------------|-------------|-------------|-------------|----|-------------|-------------|-------------|
| C            | 3.53022900  | -0.70993200 | -2.03949600 | C  | -2.92653800 | 2.53927800  | 0.81361300  |
| C            | 3.44127400  | 2.01089800  | -2.62038700 | H  | -2.59766900 | 3.26505100  | 1.55367400  |
| H            | 1.32266500  | 1.86104200  | -2.30570600 | Rh | 0.58985500  | -0.41248200 | -0.15351800 |
| C            | 4.70980700  | -0.02017900 | -2.32718400 | C  | -4.35757500 | 2.61006300  | 0.48760800  |
| H            | 3.55791400  | -1.77609700 | -1.83263100 | C  | -4.89509000 | 2.33791000  | -0.78203400 |
| C            | 4.66973900  | 1.34417700  | -2.61850200 | C  | -5.26162000 | 3.03610000  | 1.48571800  |
| H            | 3.39916300  | 3.07464600  | -2.84002900 | C  | -6.26385200 | 2.44036300  | -1.04165900 |
| H            | 5.65759100  | -0.55288300 | -2.32970000 | H  | -4.23227900 | 2.07326100  | -1.59904400 |
| H            | 5.58568300  | 1.88364600  | -2.84567500 | C  | -6.62329500 | 3.13925600  | 1.24560300  |
| C            | -5.94097300 | -1.26390300 | 1.34911300  | H  | -4.87856000 | 3.27741300  | 2.47462000  |
| C            | -5.93007000 | -2.50137000 | 0.83372100  | C  | -7.13988800 | 2.83410800  | -0.02321300 |
| C            | -4.84809200 | -3.46500700 | 1.14910800  | H  | -6.62791100 | 2.22960100  | -2.04103400 |
| C            | -3.77878700 | -2.97820100 | 2.05145000  | H  | -7.31106000 | 3.45708700  | 2.02327400  |
| C            | -3.78697000 | -1.73559600 | 2.55666600  | C  | 0.86003100  | -2.41622100 | 0.42116500  |
| C            | -4.89825000 | -0.74192800 | 2.31221700  | H  | -0.04578500 | -2.95069800 | 0.69240900  |
| H            | -6.72902200 | -0.55566000 | 1.09811300  | C  | 1.28792200  | -2.25334600 | -0.92486500 |
| H            | -6.70115600 | -2.85476200 | 0.15422200  | H  | 0.75114000  | -2.68679500 | -1.76450500 |
| H            | -2.98003500 | -3.68311700 | 2.26671800  | C  | 2.00028600  | -2.26162100 | 1.41827000  |
| H            | -2.98209300 | -1.38785000 | 3.19961200  | C  | 2.56383100  | -0.88689200 | 1.08724500  |
| O            | -4.82842500 | -4.59518900 | 0.67027400  | C  | 3.00292100  | -0.72555800 | -0.20396800 |
| O            | -4.39105400 | 0.52276000  | 1.84509200  | C  | 2.79077200  | -2.00076400 | -1.06442300 |
| C            | -5.57382100 | -0.39557500 | 3.65497200  | H  | 2.77752100  | -0.16325200 | 1.86696800  |
| H            | -4.83092800 | 0.02012900  | 4.34287300  | H  | 1.66681600  | -2.33120500 | 2.45589100  |
| H            | -6.35002900 | 0.35843200  | 3.49059000  | C  | 3.55184700  | -3.16796000 | -0.34702000 |
| H            | -6.02493200 | -1.28454100 | 4.10530500  | C  | 3.11782000  | -3.32197700 | 1.14208300  |
| C            | -3.61443000 | 0.49997100  | 0.63807500  | H  | 3.36691600  | -4.09324500 | -0.90654500 |
| H            | -3.92333600 | -0.33499400 | -0.00341800 | H  | 4.62824600  | -2.96968600 | -0.39859200 |
| H            | -3.87191400 | 1.42655300  | 0.11046800  | C  | 3.22662200  | -1.89681200 | -2.52521600 |
| C            | -2.14911000 | 0.48059800  | 0.85829200  | H  | 3.07517900  | -2.86101800 | -3.02539800 |
| C            | -1.18721400 | 0.69193900  | 1.67403800  | H  | 2.64384800  | -1.14605800 | -3.06775800 |
| H            | -0.89597600 | 0.85275000  | 2.69972300  | H  | 4.28521700  | -1.63284100 | -2.61417400 |
| O            | -2.82783600 | 5.99542400  | -2.11591800 | C  | 2.60790900  | -4.73327700 | 1.45794700  |
| C            | -2.82192000 | 7.38877800  | -1.85516300 | H  | 3.35219300  | -5.50023300 | 1.21746700  |
| H            | -3.57828400 | 7.82084800  | -2.51327700 | H  | 2.35149100  | -4.82130100 | 2.51973100  |
| H            | -3.08395700 | 7.60662800  | -0.81103900 | H  | 1.71219500  | -4.95480800 | 0.86855400  |
| H            | -1.84574500 | 7.83867800  | -2.08122000 | O  | 4.17065900  | -2.92718700 | 2.04023800  |
|              |             |             |             | C  | 5.28963200  | -3.78587300 | 2.14501300  |
|              |             |             |             | H  | 5.75392400  | -3.99753700 | 1.17007800  |
|              |             |             |             | H  | 6.01963700  | -3.26243500 | 2.76872800  |
|              |             |             |             | H  | 5.04213300  | -4.74197100 | 2.62674800  |
|              |             |             |             | C  | 3.90324200  | 0.38425800  | -0.61798900 |
|              |             |             |             | C  | 3.64131400  | 1.20740100  | -1.72663500 |
|              |             |             |             | C  | 5.08562700  | 0.60096300  | 0.11123600  |
|              |             |             |             | C  | 4.53189000  | 2.21493800  | -2.09539100 |
|              |             |             |             | H  | 2.72081800  | 1.07155200  | -2.28735000 |
|              |             |             |             | C  | 5.98068100  | 1.60636600  | -0.26056500 |
|              |             |             |             | H  | 5.30279500  | -0.04257400 | 0.95945300  |
|              |             |             |             | C  | 5.70755400  | 2.41438200  | -1.36588900 |
|              |             |             |             | H  | 4.29575100  | 2.86452500  | -2.93230500 |
|              |             |             |             | H  | 6.89262900  | 1.75404500  | 0.31239700  |
|              |             |             |             | H  | 6.40007600  | 3.20004400  | -1.65523500 |
|              |             |             |             | C  | -3.64932800 | -4.06452600 | -1.59904100 |
|              |             |             |             | C  | -3.31137600 | -5.08796000 | -0.80209600 |
|              |             |             |             | C  | -3.20375700 | -4.92597500 | 0.66786200  |
|              |             |             |             | C  | -3.45652000 | -3.56564400 | 1.19709400  |
|              |             |             |             | C  | -3.78689400 | -2.54098700 | 0.39640900  |
|              |             |             |             | C  | -3.98454900 | -2.67777500 | -1.09632500 |
|              |             |             |             | H  | -3.71020900 | -4.18746500 | -2.67928400 |
| <b>40-L3</b> |             |             |             |    |             |             |             |
| C            | 1.87176500  | 3.71799300  | 1.30656800  |    |             |             |             |
| C            | 2.63549300  | 4.07814100  | 0.26584600  |    |             |             |             |
| C            | 2.06757900  | 4.79233400  | -0.90207600 |    |             |             |             |
| C            | 0.60704500  | 5.04622600  | -0.87057500 |    |             |             |             |
| C            | -0.15339700 | 4.68543600  | 0.17301200  |    |             |             |             |
| C            | 0.40284500  | 4.04734200  | 1.42442500  |    |             |             |             |
| H            | 2.29338100  | 3.17933800  | 2.15352300  |    |             |             |             |
| H            | 3.69456000  | 3.84597300  | 0.21905700  |    |             |             |             |
| H            | 0.18934900  | 5.53398200  | -1.74725600 |    |             |             |             |
| H            | -1.22645300 | 4.86186100  | 0.17238500  |    |             |             |             |
| O            | 2.76060900  | 5.13884200  | -1.85443900 |    |             |             |             |
| O            | -0.33862000 | 2.86271300  | 1.79593700  |    |             |             |             |
| C            | 0.19137200  | 5.00031400  | 2.61900800  |    |             |             |             |
| H            | -0.87267800 | 5.23417300  | 2.72542600  |    |             |             |             |
| H            | 0.53201900  | 4.51524500  | 3.53919000  |    |             |             |             |
| H            | 0.74963500  | 5.92962200  | 2.47481700  |    |             |             |             |
| C            | -0.53442700 | 1.86074900  | 0.81007500  |    |             |             |             |
| H            | 0.08207300  | 2.07283500  | -0.08200100 |    |             |             |             |
| H            | -0.18058600 | 0.90738500  | 1.28085300  |    |             |             |             |
| C            | -1.97827100 | 1.66965000  | 0.37633400  |    |             |             |             |

|   |              |             |             |
|---|--------------|-------------|-------------|
| H | -3.09162200  | -6.07921600 | -1.19011800 |
| H | -3.34941100  | -3.44564900 | 2.27202300  |
| H | -3.95055800  | -1.54489200 | 0.79970400  |
| O | -2.90337900  | -5.86379400 | 1.40109300  |
| O | -3.22730200  | -1.70029500 | -1.83154900 |
| C | -5.45289700  | -2.35278600 | -1.44232100 |
| H | -5.69279600  | -1.33742600 | -1.11099300 |
| H | -5.59145300  | -2.40395900 | -2.52715500 |
| H | -6.13389500  | -3.05959600 | -0.95921400 |
| C | -1.81004700  | -1.65821500 | -1.58686000 |
| H | -1.48929300  | -2.60601700 | -1.13726800 |
| H | -1.34155700  | -1.60886400 | -2.57963400 |
| C | -1.33434800  | -0.48638200 | -0.75414700 |
| C | -2.22164200  | 0.50073800  | -0.45399800 |
| H | -3.23742000  | 0.38121900  | -0.81931100 |
| O | -8.49165900  | 2.96526200  | -0.16350500 |
| C | -9.06533000  | 2.67691500  | -1.42733400 |
| H | -10.13934900 | 2.83568700  | -1.31304700 |
| H | -8.68163500  | 3.34683800  | -2.20856600 |
| H | -8.88261700  | 1.63599400  | -1.72630100 |

#### 41-L3

|   |             |             |             |
|---|-------------|-------------|-------------|
| C | 4.02727900  | -1.24477000 | 0.30854200  |
| C | 3.60427200  | -2.11418400 | -0.62067100 |
| C | 2.90216400  | -1.66408700 | -1.84555700 |
| C | 2.50070000  | -0.23344300 | -1.89228200 |
| C | 2.89114700  | 0.65608100  | -0.89426000 |
| C | 3.88580800  | 0.25765100  | 0.18629100  |
| H | 4.56154700  | -1.58243700 | 1.19532300  |
| H | 3.78431800  | -3.18341300 | -0.54135800 |
| H | 2.15240100  | 0.12107200  | -2.85935200 |
| H | 2.83008300  | 1.72527100  | -1.07760800 |
| O | 2.66725000  | -2.43738900 | -2.77372100 |
| O | 3.60198600  | 0.84524800  | 1.45265500  |
| C | 5.26762900  | 0.84276100  | -0.19174500 |
| H | 5.19598900  | 1.93373500  | -0.24491800 |
| H | 5.99810500  | 0.58459700  | 0.58158700  |
| H | 5.61122600  | 0.45328000  | -1.15445000 |
| C | 2.27648800  | 0.60477100  | 1.96000900  |
| H | 2.14365300  | -0.47075300 | 2.13580300  |
| H | 2.27218900  | 1.11178800  | 2.93248900  |
| C | 1.22566500  | 1.17086400  | 1.03653300  |
| C | 0.74561500  | 2.40026200  | 1.32623000  |
| H | 1.04637400  | 2.82308700  | 2.29152300  |
| C | -0.11153900 | 3.31067500  | 0.55138200  |
| C | -0.76467300 | 4.36718400  | 1.20793200  |
| C | -0.28775200 | 3.22824900  | -0.84674100 |
| C | -1.57455000 | 5.28211400  | 0.53197900  |
| H | -0.64001500 | 4.47487400  | 2.28333700  |
| C | -1.08616100 | 4.12994600  | -1.53636500 |
| H | 0.21931700  | 2.43697000  | -1.39316700 |
| C | -1.74237100 | 5.16514300  | -0.85247900 |
| H | -2.06049100 | 6.07497700  | 1.08975700  |
| H | -1.20876500 | 4.06422200  | -2.61376100 |
| C | -0.76380400 | -0.61961000 | -2.25019500 |
| H | -0.42545200 | -0.27128300 | -3.22098500 |
| C | -0.34014600 | -1.79509500 | -1.67891000 |
| H | 0.38176300  | -2.45679000 | -2.14615300 |

|    |             |             |             |
|----|-------------|-------------|-------------|
| C  | -1.94136300 | 0.01301400  | -1.52793200 |
| C  | -1.42619000 | 0.16386500  | -0.10541100 |
| C  | -1.02698400 | -1.02910800 | 0.50917200  |
| C  | -1.14561200 | -2.23990300 | -0.45998900 |
| H  | -1.65857600 | 1.04895900  | 0.47226500  |
| H  | -2.24245100 | 0.97127500  | -1.95452300 |
| Rh | 0.71628400  | -0.03376200 | -0.56696000 |
| C  | -3.15426500 | -0.97715400 | -1.50367600 |
| C  | -2.65259200 | -2.31734800 | -0.88745500 |
| H  | -2.76339500 | -3.14315100 | -1.60032500 |
| H  | -3.25281800 | -2.56707600 | -0.00550800 |
| C  | -0.67020100 | -3.59388100 | 0.06659600  |
| H  | -0.85207400 | -4.36503200 | -0.69139200 |
| H  | 0.40394500  | -3.58958400 | 0.27836800  |
| H  | -1.19890100 | -3.88453000 | 0.97929000  |
| C  | -3.72680100 | -1.16175000 | -2.91417500 |
| H  | -4.53516700 | -1.90076300 | -2.93416200 |
| H  | -4.11628400 | -0.21158500 | -3.29714800 |
| H  | -2.94620000 | -1.51679100 | -3.59522600 |
| O  | -4.09263500 | -0.31739500 | -0.63534300 |
| C  | -5.37691200 | -0.89617200 | -0.50848400 |
| H  | -5.33715700 | -1.95099800 | -0.19790600 |
| H  | -5.89371600 | -0.32625200 | 0.26846500  |
| H  | -5.96121100 | -0.82861400 | -1.43662900 |
| C  | -1.05829400 | -1.19484600 | 1.98892300  |
| C  | -0.08683300 | -1.91975200 | 2.70052900  |
| C  | -2.13090200 | -0.63937000 | 2.70995100  |
| C  | -0.17477200 | -2.06863800 | 4.08389800  |
| H  | 0.75291600  | -2.35176900 | 2.16718900  |
| C  | -2.21984400 | -0.78966100 | 4.09432800  |
| H  | -2.90722100 | -0.10674600 | 2.16889500  |
| C  | -1.24069100 | -1.50249400 | 4.78749200  |
| H  | 0.59407800  | -2.62441800 | 4.61429400  |
| H  | -3.05850900 | -0.35194100 | 4.62959800  |
| H  | -1.30786500 | -1.61959500 | 5.86581500  |
| O  | -2.50293000 | 6.00061200  | -1.62259200 |
| C  | -3.17356100 | 7.07203000  | -0.98330000 |
| H  | -3.70890300 | 7.60547200  | -1.77142000 |
| H  | -3.89445000 | 6.71181800  | -0.23665600 |
| H  | -2.46800300 | 7.75913200  | -0.49653300 |

#### 42-ts-L3

|   |             |            |             |
|---|-------------|------------|-------------|
| C | 0.14188100  | 4.19157700 | 1.36536400  |
| C | -0.82261800 | 3.50342900 | 1.98720300  |
| C | -0.65199700 | 2.07339600 | 2.35308700  |
| C | 0.49238600  | 1.36770000 | 1.74463200  |
| C | 1.49683600  | 2.06959100 | 0.96790000  |
| C | 1.48407700  | 3.61666600 | 0.96485200  |
| H | 0.02294600  | 5.24870800 | 1.13230400  |
| H | -1.75269100 | 3.96914300 | 2.30415900  |
| H | 0.78754700  | 0.46093700 | 2.27040900  |
| H | 2.49679500  | 1.65086500 | 1.06294200  |
| O | -1.43793700 | 1.52966500 | 3.13088100  |
| O | 1.82643300  | 4.12334000 | -0.33207400 |
| C | 2.57339500  | 4.13804100 | 1.91629400  |
| H | 3.55482500  | 3.78631100 | 1.58135000  |
| H | 2.57961700  | 5.23292100 | 1.90966000  |
| H | 2.39388900  | 3.79436500 | 2.93960000  |

|    |             |             |             |                   |             |             |             |
|----|-------------|-------------|-------------|-------------------|-------------|-------------|-------------|
| C  | 1.20353200  | 3.32393800  | -1.34154100 | H                 | 5.90412000  | -5.10450900 | 0.50597800  |
| H  | 0.12772400  | 3.54826600  | -1.39517800 | H                 | 5.04419000  | -3.89286700 | 1.49674900  |
| H  | 1.67077000  | 3.61416400  | -2.28884100 |                   |             |             |             |
| C  | 1.47659900  | 1.88117400  | -0.98409900 | <b>42-ts-L3-b</b> |             |             |             |
| C  | 2.54857100  | 1.28443000  | -1.58159400 | C                 | -0.05281500 | 4.24681000  | 1.12189500  |
| H  | 3.01678800  | 1.84480400  | -2.39648000 | C                 | -1.02186000 | 3.57353800  | 1.75277400  |
| C  | 3.24154800  | 0.04050100  | -1.27020900 | C                 | -0.82562800 | 2.17753100  | 2.22327500  |
| C  | 4.46979500  | -0.23452400 | -1.91640900 | C                 | 0.35843800  | 1.46614200  | 1.70415900  |
| C  | 2.79323700  | -0.90544600 | -0.32981900 | C                 | 1.37475700  | 2.14500400  | 0.92236600  |
| C  | 5.20799500  | -1.37128400 | -1.63203300 | C                 | 1.32131700  | 3.68759200  | 0.81832100  |
| H  | 4.84876200  | 0.47295700  | -2.65045400 | H                 | -0.19165700 | 5.28126100  | 0.81092800  |
| C  | 3.52968800  | -2.04979900 | -0.02417700 | H                 | -1.97704000 | 4.03047100  | 2.00022400  |
| H  | 1.83251700  | -0.74906400 | 0.15529200  | H                 | 0.65577500  | 0.60202300  | 2.29622100  |
| C  | 4.74641700  | -2.29138000 | -0.67626500 | H                 | 2.38085900  | 1.76343900  | 1.08415300  |
| H  | 6.14995600  | -1.57280400 | -2.13263300 | O                 | -1.62531800 | 1.66525400  | 3.00823700  |
| H  | 3.14171800  | -2.74922300 | 0.70813200  | O                 | 1.70850600  | 4.11856200  | -0.49319700 |
| C  | -1.46141800 | 0.81861900  | -2.05054900 | C                 | 2.35230200  | 4.30099800  | 1.77965100  |
| H  | -1.22216800 | 1.64407600  | -2.71374700 | H                 | 3.35689400  | 3.95804200  | 1.51068300  |
| C  | -0.76663800 | -0.37814500 | -2.04430200 | H                 | 2.32919700  | 5.39292400  | 1.70225700  |
| H  | 0.07400000  | -0.58398200 | -2.70060000 | H                 | 2.13658800  | 4.01792300  | 2.81443600  |
| C  | -2.77202200 | 0.75781600  | -1.27942500 | C                 | 1.14727000  | 3.23979700  | -1.47254700 |
| C  | -2.32530100 | 0.30439300  | 0.10413000  | H                 | 0.07014600  | 3.43371400  | -1.58516900 |
| C  | -1.65026600 | -0.91871500 | 0.13139100  | H                 | 1.64734700  | 3.48010000  | -2.41710700 |
| C  | -1.46869600 | -1.51272100 | -1.29611200 | C                 | 1.43686900  | 1.83046500  | -1.00945900 |
| H  | -2.74376800 | 0.73952700  | 1.00540100  | C                 | 2.54672100  | 1.22360300  | -1.52154000 |
| H  | -3.29292900 | 1.71724200  | -1.25002500 | H                 | 3.03874100  | 1.74132000  | -2.35060200 |
| Rh | -0.19353900 | 0.77607900  | -0.19461800 | C                 | 3.25291500  | 0.02179700  | -1.09603700 |
| C  | -2.90401500 | -1.67994700 | -1.90260700 | C                 | 4.52454100  | -0.24688800 | -1.63790500 |
| C  | -3.70797400 | -0.34472800 | -1.87859000 | C                 | 2.76461600  | -0.88964200 | -0.13200700 |
| H  | -2.80533500 | -2.05977300 | -2.92682300 | C                 | 5.28612900  | -1.34451000 | -1.24172600 |
| H  | -3.43826100 | -2.44199000 | -1.32448000 | H                 | 4.93344300  | 0.43149100  | -2.38335100 |
| C  | -0.69231400 | -2.82583600 | -1.38834700 | C                 | 3.51351700  | -1.98092400 | 0.27991800  |
| H  | -0.67429100 | -3.17147400 | -2.42927700 | H                 | 1.76643200  | -0.73891600 | 0.27342500  |
| H  | 0.34602000  | -2.70290800 | -1.06479000 | C                 | 4.78376600  | -2.22035600 | -0.27001100 |
| H  | -1.15062400 | -3.61105000 | -0.77917700 | H                 | 6.26074800  | -1.50459100 | -1.68869000 |
| C  | -4.20104000 | 0.06318100  | -3.27221200 | H                 | 3.13264100  | -2.67839000 | 1.02011200  |
| H  | -4.80961500 | -0.72101400 | -3.73598300 | C                 | -1.43754200 | 0.63765600  | -2.11910900 |
| H  | -4.80185100 | 0.97799100  | -3.21343900 | H                 | -1.18771500 | 1.42416300  | -2.82443200 |
| H  | -3.34952600 | 0.24862700  | -3.93520700 | C                 | -0.72465200 | -0.54333300 | -2.01300200 |
| O  | -4.79200400 | -0.39727500 | -0.93391500 | H                 | 0.14312700  | -0.77448200 | -2.62432200 |
| C  | -5.89437500 | -1.22315600 | -1.25339200 | C                 | -2.77483200 | 0.60060800  | -1.39373000 |
| H  | -5.59772500 | -2.26028100 | -1.47019000 | C                 | -2.37246400 | 0.24193700  | 0.03059700  |
| H  | -6.54008000 | -1.22593600 | -0.37096100 | C                 | -1.68017100 | -0.96494900 | 0.15898100  |
| H  | -6.47262100 | -0.84144400 | -2.10663600 | C                 | -1.43545600 | -1.64201200 | -1.22118000 |
| C  | -1.61444800 | -1.76074100 | 1.36101400  | H                 | -2.83417500 | 0.72222600  | 0.88674700  |
| C  | -0.45953100 | -2.42898100 | 1.80124000  | H                 | -3.31234000 | 1.55004400  | -1.44412900 |
| C  | -2.79476900 | -1.91818000 | 2.10831600  | Rh                | -0.24007900 | 0.73619800  | -0.21771800 |
| C  | -0.48033100 | -3.21634000 | 2.95124200  | C                 | -2.84358000 | -1.87255200 | -1.86977700 |
| H  | 0.46655500  | -2.31319800 | 1.24753300  | C                 | -3.66950100 | -0.55393300 | -1.95654700 |
| C  | -2.81727200 | -2.70717300 | 3.25872100  | H                 | -2.69942200 | -2.31009800 | -2.86520200 |
| H  | -3.69929200 | -1.42169200 | 1.76997000  | H                 | -3.38642600 | -2.60944900 | -1.26763800 |
| C  | -1.66011400 | -3.35864400 | 3.68587900  | C                 | -0.63489000 | -2.94346700 | -1.19976900 |
| H  | 0.42844400  | -3.71471200 | 3.27946800  | H                 | -0.56086900 | -3.34891300 | -2.21625000 |
| H  | -3.74098500 | -2.80944100 | 3.82225700  | H                 | 0.38415600  | -2.78269000 | -0.83406200 |
| H  | -1.67476100 | -3.97034800 | 4.58402200  | H                 | -1.10968100 | -3.70001500 | -0.56747500 |
| O  | 5.53950000  | -3.37943200 | -0.46629400 | C                 | -4.11751200 | -0.24043800 | -3.38942600 |
| C  | 5.12792900  | -4.33721000 | 0.49620200  | H                 | -4.69788400 | -1.06120200 | -3.82514300 |
| H  | 4.16819600  | -4.79611600 | 0.22402400  | H                 | -4.73281600 | 0.66642300  | -3.40920200 |

|   |             |             |             |
|---|-------------|-------------|-------------|
| H | -3.24520500 | -0.08204300 | -4.03225300 |
| O | -4.78653100 | -0.56879700 | -1.04977700 |
| C | -5.86200500 | -1.43436300 | -1.35540200 |
| H | -5.54086100 | -2.47824700 | -1.48897900 |
| H | -6.54270600 | -1.38929500 | -0.50087300 |
| H | -6.41129600 | -1.12189500 | -2.25476300 |
| C | -1.68156100 | -1.73118200 | 1.43794700  |
| C | -0.53445000 | -2.34374300 | 1.97017800  |
| C | -2.89234900 | -1.87267600 | 2.13860600  |
| C | -0.59275700 | -3.06193900 | 3.16337900  |
| H | 0.41516000  | -2.24063300 | 1.45515000  |
| C | -2.95225700 | -2.59285700 | 3.33197200  |
| H | -3.79033900 | -1.41888700 | 1.72994400  |
| C | -1.80264000 | -3.18935500 | 3.85015400  |
| H | 0.31022900  | -3.51779600 | 3.56146800  |
| H | -3.89926700 | -2.68413800 | 3.85753700  |
| H | -1.84652900 | -3.74724400 | 4.78176600  |
| O | 5.43387200  | -3.32431700 | 0.19446900  |
| C | 6.71510200  | -3.62450700 | -0.33566300 |
| H | 7.43423100  | -2.81976100 | -0.13332000 |
| H | 7.04215800  | -4.53524600 | 0.16926100  |
| H | 6.67164000  | -3.80529200 | -1.41787900 |

**42-ts-L3-c**

|   |             |             |             |
|---|-------------|-------------|-------------|
| C | 0.49032800  | 4.36535300  | -0.43923900 |
| C | 1.09702400  | 3.93369600  | -1.55208700 |
| C | 0.49585200  | 2.87936500  | -2.40847900 |
| C | -0.63989300 | 2.13580300  | -1.83428300 |
| C | -1.24336800 | 2.50776500  | -0.57366900 |
| C | -0.84430100 | 3.85558600  | 0.06557700  |
| H | 0.92110800  | 5.16083200  | 0.16719300  |
| H | 2.02839900  | 4.36735800  | -1.90844800 |
| H | -1.25722100 | 1.62216700  | -2.57035000 |
| H | -2.30974500 | 2.30287700  | -0.51208800 |
| O | 0.93880500  | 2.65323600  | -3.53754700 |
| O | -0.78564900 | 3.73905500  | 1.49041900  |
| C | -1.93545100 | 4.90042000  | -0.22314200 |
| H | -2.88451500 | 4.56971500  | 0.21146400  |
| H | -1.66321000 | 5.85752800  | 0.23368800  |
| H | -2.06049800 | 5.04799500  | -1.30015900 |
| C | -0.15815400 | 2.50028700  | 1.84270100  |
| H | 0.92235300  | 2.56195600  | 1.66033400  |
| H | -0.32089200 | 2.37032900  | 2.91756800  |
| C | -0.82459200 | 1.41742800  | 1.02545500  |
| C | -1.85354200 | 0.74325700  | 1.61529800  |
| H | -1.99082700 | 0.92255600  | 2.68587400  |
| C | -2.86585700 | -0.14308300 | 1.05347900  |
| C | -3.93794100 | -0.54428700 | 1.87427600  |
| C | -2.87483400 | -0.61078700 | -0.28146700 |
| C | -4.97243100 | -1.35271100 | 1.40825500  |
| H | -3.96470300 | -0.20488800 | 2.90733100  |
| C | -3.90077300 | -1.40916600 | -0.76234300 |
| H | -2.04258200 | -0.35925000 | -0.93492200 |
| C | -4.96119900 | -1.78927200 | 0.07682600  |
| H | -5.77436700 | -1.63214800 | 2.08217100  |
| H | -3.90048100 | -1.76782600 | -1.78737400 |
| C | 0.83366800  | -0.83514300 | -2.20052900 |
| H | 0.27334900  | -0.70733200 | -3.12155500 |

|    |             |             |             |
|----|-------------|-------------|-------------|
| C  | 1.97169000  | -0.09683000 | -1.90051900 |
| H  | 2.36419200  | 0.67098200  | -2.56146200 |
| C  | 0.66405900  | -2.05680900 | -1.30759900 |
| C  | 0.68287400  | -1.45457600 | 0.09086600  |
| C  | 1.83716400  | -0.75046800 | 0.41855000  |
| C  | 2.82964300  | -0.68561000 | -0.77770700 |
| H  | -0.01888600 | -1.78680400 | 0.84767700  |
| H  | -0.25957700 | -2.60521400 | -1.50474300 |
| Rh | 0.29410900  | 0.62429600  | -0.64443300 |
| C  | 1.89690500  | -3.00957500 | -1.44849900 |
| C  | 3.17490200  | -2.16767000 | -1.15480000 |
| H  | 3.84395000  | -2.15570600 | -2.02380800 |
| H  | 3.72927300  | -2.61855100 | -0.32430100 |
| C  | 4.10918200  | 0.12150400  | -0.56271000 |
| H  | 4.74493600  | 0.04479900  | -1.45287100 |
| H  | 3.89156300  | 1.18290400  | -0.40588600 |
| H  | 4.68347700  | -0.24197200 | 0.29518800  |
| C  | 1.92703000  | -3.64756400 | -2.84252100 |
| H  | 2.81634400  | -4.27054300 | -2.98808600 |
| H  | 1.03880400  | -4.27053400 | -2.99854300 |
| H  | 1.94576800  | -2.87020200 | -3.61329500 |
| O  | 1.66704100  | -3.99470100 | -0.42421600 |
| C  | 2.55310300  | -5.09503000 | -0.37051300 |
| H  | 3.60662500  | -4.78751800 | -0.29103700 |
| H  | 2.28912100  | -5.65718700 | 0.52964400  |
| H  | 2.45043500  | -5.76110900 | -1.23876900 |
| C  | 2.25002500  | -0.54475800 | 1.83403400  |
| C  | 2.82778200  | 0.64837800  | 2.30365500  |
| C  | 2.08152600  | -1.59905400 | 2.75143100  |
| C  | 3.20442900  | 0.78829800  | 3.63886600  |
| H  | 2.96603400  | 1.48020100  | 1.62159900  |
| C  | 2.45698700  | -1.45938800 | 4.08803500  |
| H  | 1.67312100  | -2.54139800 | 2.39841600  |
| C  | 3.01832800  | -0.26393200 | 4.53871000  |
| H  | 3.64016400  | 1.72461000  | 3.97794900  |
| H  | 2.31677600  | -2.29005100 | 4.77506800  |
| H  | 3.31277000  | -0.15337000 | 5.57894300  |
| O  | -5.91300700 | -2.58304400 | -0.49034100 |
| C  | -6.99709000 | -3.01488700 | 0.31623900  |
| H  | -7.58709700 | -2.16648100 | 0.68768300  |
| H  | -7.62303900 | -3.63368800 | -0.32929500 |
| H  | -6.65178400 | -3.61396900 | 1.16927700  |

**42-ts-L3-d**

|   |             |            |             |
|---|-------------|------------|-------------|
| C | 0.21290000  | 4.30509700 | -0.76556400 |
| C | 0.70084200  | 3.80341900 | -1.90763900 |
| C | 0.04518800  | 2.66630500 | -2.60327000 |
| C | -0.98173500 | 1.93518900 | -1.83847400 |
| C | -1.44657700 | 2.39069700 | -0.54724400 |
| C | -1.03376000 | 3.79839800 | -0.06850700 |
| H | 0.68092400  | 5.15913000 | -0.27797800 |
| H | 1.56627200  | 4.23474700 | -2.40516800 |
| H | -1.65796700 | 1.33868100 | -2.44948600 |
| H | -2.48747900 | 2.15311400 | -0.33967100 |
| O | 0.35885600  | 2.36487200 | -3.75777900 |
| O | -0.81170900 | 3.80496800 | 1.34491300  |
| C | -2.19239500 | 4.78077200 | -0.31121400 |
| H | -3.07213000 | 4.45720000 | 0.25473400  |



|    |             |             |             |              |             |             |             |
|----|-------------|-------------|-------------|--------------|-------------|-------------|-------------|
| H  | -1.91005600 | 5.78046100  | 0.03473700  | C            | -6.11263500 | -3.34902700 | -0.68524900 |
| H  | -2.44354800 | 4.83456500  | -1.37486500 | H            | -5.25865900 | -3.98465600 | -0.95467900 |
| C  | -0.10071300 | 2.62143100  | 1.72816100  | H            | -7.01318900 | -3.96279100 | -0.62397300 |
| H  | 0.95369500  | 2.70401700  | 1.43498300  | H            | -6.24832900 | -2.58161100 | -1.45880500 |
| H  | -0.15241500 | 2.57617700  | 2.82092400  |              |             |             |             |
| C  | -0.79831100 | 1.45194600  | 1.07286700  | <b>43-L3</b> |             |             |             |
| C  | -1.72761800 | 0.78723300  | 1.81859900  | C            | 3.97458700  | -2.16311700 | 1.08140300  |
| H  | -1.76041300 | 1.04462900  | 2.88151500  | C            | 3.17457000  | -2.94195000 | 0.34345700  |
| C  | -2.75839900 | -0.17012200 | 1.43387900  | C            | 2.44466700  | -2.44614600 | -0.85497700 |
| C  | -3.73719800 | -0.52676600 | 2.39188300  | C            | 2.35404900  | -0.99473700 | -1.04347400 |
| C  | -2.88261900 | -0.74659700 | 0.15528300  | C            | 3.24248700  | -0.05774200 | -0.21374300 |
| C  | -4.77927300 | -1.38704400 | 2.09000600  | C            | 4.21256100  | -0.68969400 | 0.83919600  |
| H  | -3.67304000 | -0.10436600 | 3.39207400  | H            | 4.52553900  | -2.57508600 | 1.92672600  |
| C  | -3.93067700 | -1.60887200 | -0.16663500 | H            | 3.07006800  | -4.00536600 | 0.54823600  |
| H  | -2.12518600 | -0.53315400 | -0.59561300 | H            | 2.29078100  | -0.74051300 | -2.10504500 |
| C  | -4.88975200 | -1.93490500 | 0.80134200  | H            | 3.82311800  | 0.62682900  | -0.84244200 |
| H  | -5.52577500 | -1.65261500 | 2.83211200  | O            | 1.93303400  | -3.26552600 | -1.63054700 |
| H  | -3.98198100 | -2.02895600 | -1.16504400 | O            | 3.92636100  | 0.01656100  | 2.07127600  |
| C  | 0.56474300  | -1.01156900 | -2.11660800 | C            | 5.68679500  | -0.43443400 | 0.52493200  |
| H  | -0.11883200 | -1.00151200 | -2.96009900 | H            | 5.86839400  | 0.64275000  | 0.44381500  |
| C  | 1.69480000  | -0.20562300 | -2.05021700 | H            | 6.32603100  | -0.83266200 | 1.32030100  |
| H  | 1.95637800  | 0.50326700  | -2.83070000 | H            | 5.96649000  | -0.91644100 | -0.41785400 |
| C  | 0.57679700  | -2.13958300 | -1.09446900 | C            | 2.52645300  | 0.27488600  | 2.08991600  |
| C  | 0.75475500  | -1.39680600 | 0.22261400  | H            | 1.97300500  | -0.62587000 | 2.39568100  |
| C  | 1.90827800  | -0.62463700 | 0.31519900  | H            | 2.33474200  | 1.07079800  | 2.81517100  |
| C  | 2.72497200  | -0.64690200 | -1.00816200 | C            | 2.23090300  | 0.68842500  | 0.65632200  |
| H  | 0.17926300  | -1.67305800 | 1.09883000  | C            | 1.33947100  | 1.68868500  | 0.31497900  |
| H  | -0.33729100 | -2.73713300 | -1.10691800 | H            | 0.76179800  | 2.08270600  | 1.15058000  |
| Rh | 0.16470900  | 0.57769000  | -0.65018900 | C            | 1.20169600  | 2.51954800  | -0.90000300 |
| C  | 1.82452200  | -3.05931800 | -1.30785100 | C            | 0.29399700  | 3.60155500  | -0.83519200 |
| C  | 3.08724600  | -2.14678800 | -1.28818000 | C            | 1.90128100  | 2.35186700  | -2.10822500 |
| H  | 3.62113300  | -2.19959300 | -2.24468900 | C            | 0.09664200  | 4.46229100  | -1.90340500 |
| H  | 3.77976700  | -2.48979000 | -0.51144200 | H            | -0.26235000 | 3.76671400  | 0.08458200  |
| C  | 3.98267500  | 0.22013500  | -1.05155800 | C            | 1.71639800  | 3.21308100  | -3.19069500 |
| H  | 4.49371900  | 0.07667800  | -2.01112300 | H            | 2.60046600  | 1.53473000  | -2.22846700 |
| H  | 3.74144200  | 1.28444900  | -0.96502300 | C            | 0.80923600  | 4.27583800  | -3.09747400 |
| H  | 4.68457200  | -0.03837800 | -0.25263900 | H            | -0.60122500 | 5.29117100  | -1.83746600 |
| C  | 1.69488800  | -3.84465600 | -2.61857400 | H            | 2.28185100  | 3.04122900  | -4.09951900 |
| H  | 2.58419800  | -4.45106200 | -2.82258400 | C            | -0.83334900 | -1.60569800 | -1.59959600 |
| H  | 0.82404400  | -4.50944200 | -2.58318300 | H            | -0.29443400 | -2.00181000 | -2.45305900 |
| H  | 1.57185100  | -3.15517100 | -3.46027900 | C            | -0.76257900 | -2.19003000 | -0.33774700 |
| O  | 1.78458800  | -3.93268200 | -0.16412400 | H            | -0.16898200 | -3.07964200 | -0.15051700 |
| C  | 2.72086000  | -4.99136400 | -0.12218400 | C            | -1.97489300 | -0.60257800 | -1.71531700 |
| H  | 3.75940400  | -4.64325000 | -0.22644800 | C            | -1.69890500 | 0.36327900  | -0.57045100 |
| H  | 2.61067700  | -5.45883500 | 0.86025000  | C            | -1.66144400 | -0.20898800 | 0.69461600  |
| H  | 2.53065700  | -5.75184500 | -0.89256100 | C            | -1.85581200 | -1.75059300 | 0.63597600  |
| C  | 2.50206900  | -0.26561400 | 1.63191600  | H            | -1.78554600 | 1.43456100  | -0.71651700 |
| C  | 3.07240000  | 0.99059500  | 1.90384300  | H            | -2.00233400 | -0.09667000 | -2.68269400 |
| C  | 2.52401800  | -1.23464500 | 2.65236400  | Rh           | 0.42332200  | -0.33970700 | -0.33410100 |
| H  | 3.06288000  | 1.75839500  | 1.13769800  | C            | -3.34644600 | -1.30444300 | -1.43604200 |
| C  | 3.07868900  | -0.95320700 | 3.90140300  | C            | -3.24103800 | -2.00971600 | -0.04967500 |
| H  | 2.12153900  | -2.22181300 | 2.44492600  | H            | -3.37854800 | -3.09311800 | -0.15047900 |
| C  | 3.63173200  | 0.30230000  | 4.15708100  | H            | -4.03309600 | -1.64320800 | 0.61264100  |
| H  | 4.05450100  | 2.25392000  | 3.33985200  | C            | -1.76714200 | -2.49021700 | 1.97004400  |
| H  | 3.08422300  | -1.71969200 | 4.67218100  | H            | -1.96194000 | -3.55824800 | 1.81533100  |
| H  | 4.06530300  | 0.52326400  | 5.12877100  | H            | -0.77027100 | -2.39809900 | 2.41329100  |
| O  | -5.94731300 | -2.77080300 | 0.59954800  | H            | -2.49833700 | -2.11457300 | 2.69290200  |
|    |             |             |             | C            | -3.68340700 | -2.28691400 | -2.56403000 |

|   |             |             |             |
|---|-------------|-------------|-------------|
| H | -4.60360000 | -2.84536100 | -2.35993800 |
| H | -3.80534300 | -1.75334200 | -3.51366500 |
| H | -2.87759400 | -3.01914100 | -2.67954700 |
| O | -4.27585900 | -0.20524100 | -1.39758100 |
| C | -5.65070400 | -0.52279700 | -1.30661100 |
| H | -5.88031800 | -1.16750800 | -0.44486800 |
| H | -6.17703900 | 0.42709200  | -1.17751300 |
| H | -6.03044700 | -1.01026900 | -2.21539400 |
| C | -1.88837300 | 0.60167700  | 1.92238400  |
| C | -1.11103700 | 0.46829100  | 3.08655500  |
| C | -2.93343200 | 1.54420000  | 1.92991900  |
| C | -1.36160400 | 1.25443100  | 4.21071000  |
| H | -0.29243300 | -0.24350100 | 3.10014000  |
| C | -3.18320300 | 2.33281700  | 3.05437600  |
| H | -3.56108300 | 1.63499000  | 1.04788700  |
| C | -2.39770500 | 2.19212700  | 4.19921300  |
| H | -0.74249600 | 1.13810700  | 5.09659900  |
| H | -3.99719000 | 3.05308800  | 3.03612300  |
| H | -2.59107000 | 2.80447300  | 5.07588000  |
| O | 0.55155900  | 5.17126100  | -4.09226800 |
| C | 1.24735400  | 5.03132600  | -5.32067100 |
| H | 0.89160300  | 5.84108400  | -5.96030600 |
| H | 2.33244200  | 5.12810000  | -5.18304600 |
| H | 1.02960600  | 4.06788600  | -5.80041500 |

**60-L3**

|   |            |             |             |
|---|------------|-------------|-------------|
| C | 1.77635100 | -3.61791400 | -1.47746900 |
| C | 1.05327400 | -4.19823200 | -0.50913300 |
| C | 1.05813800 | -3.68308200 | 0.87985200  |
| C | 1.71114100 | -2.36614300 | 1.09631500  |
| C | 2.45288900 | -1.75934800 | 0.08625100  |
| C | 2.71807300 | -2.45646300 | -1.24412700 |
| H | 1.77605500 | -4.00801900 | -2.49395700 |
| H | 0.44975600 | -5.08485300 | -0.68645700 |
| H | 1.84207100 | -2.07734000 | 2.13703600  |
| H | 3.17319800 | -0.99105300 | 0.34935500  |
| O | 0.54371100 | -4.31434000 | 1.80229800  |
| O | 2.72158100 | -1.57352900 | -2.36563600 |
| C | 4.16315300 | -3.01144100 | -1.20973700 |
| H | 4.86542000 | -2.18263400 | -1.07543100 |
| H | 4.38925700 | -3.50219900 | -2.16164500 |
| H | 4.28900200 | -3.73215200 | -0.39652000 |
| C | 1.60925500 | -0.66089000 | -2.46310600 |
| H | 0.69123200 | -1.22115100 | -2.69086100 |
| H | 1.86000400 | -0.03824300 | -3.33069600 |
| C | 1.49803800 | 0.15437300  | -1.19827400 |
| C | 2.23458700 | 1.28372200  | -1.11301200 |
| H | 2.69290700 | 1.63737200  | -2.04300900 |
| C | 2.60994700 | 2.09165000  | 0.05269400  |
| C | 3.35002700 | 3.27811200  | -0.14460100 |
| C | 2.32603900 | 1.74233000  | 1.38497200  |
| C | 3.76881700 | 4.06961600  | 0.91477200  |
| H | 3.59719900 | 3.58012000  | -1.15984800 |
| C | 2.74202800 | 2.52504300  | 2.46485600  |
| H | 1.74825800 | 0.84008300  | 1.58205000  |
| C | 3.46867100 | 3.69989800  | 2.23452100  |
| H | 4.33541400 | 4.98079700  | 0.74796800  |
| H | 2.49752200 | 2.20895200  | 3.47328200  |

|    |             |             |             |
|----|-------------|-------------|-------------|
| C  | -1.31573300 | -0.84293900 | 1.87842600  |
| H  | -0.90365500 | -0.94287400 | 2.87887000  |
| C  | -1.52578800 | -1.91159300 | 1.04407000  |
| H  | -1.29320200 | -2.93300100 | 1.31748400  |
| C  | -1.98425400 | 0.45733400  | 1.43606100  |
| C  | -1.39357900 | 0.71408800  | 0.02119000  |
| C  | -1.53846000 | -0.41271000 | -0.80263500 |
| H  | -1.44136500 | -0.32845200 | -1.87970200 |
| C  | -2.32786600 | -1.56003700 | -0.19456000 |
| H  | -2.43537600 | -2.40080700 | -0.88286700 |
| Rh | 0.35550200  | -0.76491100 | 0.24348000  |
| C  | -3.50951100 | 0.15453100  | 1.22526300  |
| C  | -3.73720400 | -1.01600900 | 0.22096700  |
| H  | -3.95661600 | -0.07386100 | 2.20033100  |
| H  | -3.99383200 | 1.06313600  | 0.85094500  |
| C  | -1.79135700 | 1.57261200  | 2.46264500  |
| H  | -0.72954100 | 1.75951000  | 2.65385500  |
| H  | -2.24671900 | 2.51067600  | 2.13251400  |
| H  | -2.25844300 | 1.28467600  | 3.41249200  |
| C  | -4.58945400 | -2.14051800 | 0.82130000  |
| H  | -5.55541600 | -1.77174100 | 1.18306400  |
| H  | -4.77451400 | -2.92209200 | 0.07563400  |
| H  | -4.07334200 | -2.59193700 | 1.67500900  |
| O  | -4.28565000 | -0.54883300 | -1.02521600 |
| C  | -5.63290600 | -0.11601300 | -1.02003800 |
| H  | -5.82177900 | 0.66906300  | -0.27306200 |
| H  | -5.82488300 | 0.29856400  | -2.01334700 |
| H  | -6.33674900 | -0.94118400 | -0.84441400 |
| C  | -1.34719700 | 2.08494900  | -0.56671700 |
| C  | -0.57674500 | 3.13522600  | -0.04181500 |
| C  | -2.17051100 | 2.36146100  | -1.67583700 |
| C  | -0.60982200 | 4.40529400  | -0.61610600 |
| H  | 0.07928800  | 2.95186000  | 0.79895200  |
| C  | -2.20450500 | 3.63271200  | -2.24988500 |
| H  | -2.81129200 | 1.57533100  | -2.06351200 |
| C  | -1.42080100 | 4.66043600  | -1.72397900 |
| H  | 0.01183800  | 5.19370400  | -0.20036700 |
| H  | -2.85034200 | 3.81932400  | -3.10428200 |
| H  | -1.44388100 | 5.65144000  | -2.16984500 |
| O  | 3.92477200  | 4.54210900  | 3.20989400  |
| C  | 3.65420900  | 4.21015300  | 4.56015300  |
| H  | 4.10331200  | 5.00335700  | 5.16115800  |
| H  | 2.57451500  | 4.17278500  | 4.75999900  |
| H  | 4.10320500  | 3.24711700  | 4.83886400  |

**61-ts-L3**

|   |             |             |             |
|---|-------------|-------------|-------------|
| C | 0.70036900  | -4.14713400 | 0.22616900  |
| C | 1.59823400  | -3.60293300 | -0.60375800 |
| C | 1.22254800  | -2.51929800 | -1.54882600 |
| C | -0.06105100 | -1.84287300 | -1.29179800 |
| C | -1.04949900 | -2.39103200 | -0.38277100 |
| C | -0.76375000 | -3.76211700 | 0.27831000  |
| H | 0.96895300  | -4.96220300 | 0.89681500  |
| H | 2.62284500  | -3.95999400 | -0.66508200 |
| H | -0.42884500 | -1.28316700 | -2.15167600 |
| H | -2.07355100 | -2.29323300 | -0.73728400 |
| O | 1.94656300  | -2.22992900 | -2.49950900 |
| O | -1.18939100 | -3.76805200 | 1.64888000  |

|    |             |             |             |                   |             |             |             |
|----|-------------|-------------|-------------|-------------------|-------------|-------------|-------------|
| C  | -1.60168600 | -4.84678400 | -0.41925200 | H                 | 6.65853600  | -1.24802600 | -2.05198800 |
| H  | -2.66625600 | -4.61053000 | -0.31871900 | O                 | -6.16605700 | 1.91743400  | -1.91470800 |
| H  | -1.41884800 | -5.81819100 | 0.05180100  | C                 | -7.53641400 | 2.08772900  | -1.58993800 |
| H  | -1.34364000 | -4.91746600 | -1.48036300 | H                 | -7.96791300 | 2.66861300  | -2.40710500 |
| C  | -0.91894800 | -2.49916100 | 2.24826500  | H                 | -8.05650900 | 1.12346500  | -1.51665600 |
| H  | 0.15685900  | -2.39531600 | 2.45588200  | H                 | -7.66287600 | 2.63784800  | -0.64798600 |
| H  | -1.46152000 | -2.48929700 | 3.19998500  |                   |             |             |             |
| C  | -1.42499600 | -1.44812700 | 1.28668400  | <b>61-ts-L3-b</b> |             |             |             |
| C  | -2.69559600 | -0.98774600 | 1.47501000  | C                 | -0.61027300 | -4.16914900 | -0.12276000 |
| H  | -3.18534300 | -1.29471400 | 2.40377100  | C                 | -1.49102000 | -3.61293700 | 0.71757600  |
| C  | -3.55966900 | -0.20496200 | 0.60022400  | C                 | -1.10346000 | -2.49613500 | 1.61789900  |
| C  | -4.91598300 | -0.05297200 | 0.94977800  | C                 | 0.16239500  | -1.81052000 | 1.30243300  |
| C  | -3.14114400 | 0.39717900  | -0.61006200 | C                 | 1.13219800  | -2.37362600 | 0.38295900  |
| C  | -5.81904600 | 0.64189200  | 0.14837400  | C                 | 0.84610000  | -3.76656800 | -0.22966800 |
| H  | -5.27434800 | -0.50180400 | 1.87357000  | H                 | -0.88686600 | -5.00765300 | -0.76043900 |
| C  | -4.02957000 | 1.08580300  | -1.42142200 | H                 | -2.50795200 | -3.98225400 | 0.82026300  |
| H  | -2.09335900 | 0.34100700  | -0.89480400 | H                 | 0.54580400  | -1.22016000 | 2.13450000  |
| C  | -5.37850800 | 1.21519100  | -1.05226600 | H                 | 2.16468400  | -2.25072000 | 0.70383700  |
| H  | -6.85282200 | 0.72833800  | 0.46314700  | O                 | -1.80272000 | -2.18728600 | 2.58089800  |
| H  | -3.70126700 | 1.54771300  | -2.34773500 | O                 | 1.23272600  | -3.80843900 | -1.61104900 |
| C  | 0.64528200  | 1.01919600  | 1.97215800  | C                 | 1.71844000  | -4.81940700 | 0.47485100  |
| H  | 0.42014600  | 0.61673900  | 2.95586600  | H                 | 2.77633700  | -4.57245900 | 0.33680900  |
| C  | -0.30381200 | 1.62168400  | 1.16423500  | H                 | 1.53572700  | -5.80646800 | 0.03755500  |
| H  | -1.34724000 | 1.72646500  | 1.44047800  | H                 | 1.49150600  | -4.86222700 | 1.54454700  |
| C  | 2.08993700  | 1.27730500  | 1.54777000  | C                 | 0.93605500  | -2.56078900 | -2.24212200 |
| C  | 2.12442600  | 0.74262300  | 0.08682900  | H                 | -0.14479000 | -2.47384300 | -2.43069200 |
| C  | 1.13895100  | 1.33389200  | -0.70526300 | H                 | 1.45835200  | -2.57478000 | -3.20509400 |
| H  | 1.17513100  | 1.27827700  | -1.78802700 | C                 | 1.45241000  | -1.47574500 | -1.32494400 |
| C  | 0.30020100  | 2.39255000  | -0.00018000 | C                 | 2.71276900  | -1.00693600 | -1.55608300 |
| H  | -0.45720900 | 2.82596200  | -0.65694100 | H                 | 3.18410300  | -1.33442400 | -2.48725800 |
| Rh | 0.13123500  | -0.37604200 | 0.27322500  | C                 | 3.58838000  | -0.19296100 | -0.72223300 |
| C  | 2.30239700  | 2.82879200  | 1.46338300  | C                 | 4.94074700  | -0.03739800 | -1.11028800 |
| C  | 1.26348900  | 3.50964600  | 0.52250200  | C                 | 3.19506900  | 0.43341400  | 0.47644300  |
| H  | 2.24166000  | 3.24145000  | 2.47786000  | C                 | 5.84342400  | 0.68266700  | -0.34664700 |
| H  | 3.31593800  | 3.02201500  | 1.09480700  | H                 | 5.28125100  | -0.50573500 | -2.03103300 |
| C  | 3.08950500  | 0.65713400  | 2.52348100  | C                 | 4.09470000  | 1.15621900  | 1.26022700  |
| H  | 2.90552900  | -0.41300900 | 2.66293900  | H                 | 2.15439100  | 0.37533900  | 0.78653400  |
| H  | 4.12184100  | 0.78182000  | 2.18352800  | C                 | 5.42912000  | 1.28523000  | 0.85305100  |
| H  | 2.99414700  | 1.14068000  | 3.50348100  | H                 | 6.87916800  | 0.79454000  | -0.65198000 |
| C  | 0.47079600  | 4.61488700  | 1.23109000  | H                 | 3.74304600  | 1.62305300  | 2.17364100  |
| H  | 1.12719200  | 5.37824600  | 1.66329800  | C                 | -0.66259200 | 0.94362700  | -2.02874300 |
| H  | -0.21457600 | 5.10459000  | 0.52987100  | H                 | -0.45716500 | 0.51337500  | -3.00491600 |
| H  | -0.11730700 | 4.19054600  | 2.05148600  | C                 | 0.29862000  | 1.58118800  | -1.26330000 |
| O  | 1.88075500  | 3.99631200  | -0.68304700 | H                 | 1.33379100  | 1.68979100  | -1.56795000 |
| C  | 2.72753500  | 5.12320700  | -0.57004400 | C                 | -2.09937600 | 1.19531400  | -1.57472300 |
| H  | 3.52958500  | 4.97798300  | 0.16904100  | C                 | -2.08923500 | 0.70564600  | -0.09753400 |
| H  | 3.18541300  | 5.26165100  | -1.55333700 | C                 | -1.09221200 | 1.33322900  | 0.65077200  |
| H  | 2.17688400  | 6.03826700  | -0.31052100 | H                 | -1.10127200 | 1.31104100  | 1.73534300  |
| C  | 3.35626700  | 0.14578900  | -0.49868800 | C                 | -0.28656800 | 2.38007500  | -0.10820900 |
| C  | 3.93019100  | -1.04568500 | -0.02476300 | H                 | 0.48124600  | 2.84363700  | 0.51514100  |
| C  | 4.00741400  | 0.82621700  | -1.54268900 | Rh                | -0.08881600 | -0.39496500 | -0.30125000 |
| C  | 5.10801700  | -1.54227300 | -0.57946500 | C                 | -2.33214700 | 2.74528400  | -1.53089300 |
| H  | 3.43189200  | -1.60363000 | 0.76126100  | C                 | -1.27728900 | 3.46824800  | -0.64042200 |
| C  | 5.18623700  | 0.32865900  | -2.09883000 | H                 | -2.30603600 | 3.12805000  | -2.55843100 |
| H  | 3.58885400  | 1.76272700  | -1.89996300 | H                 | -3.33772800 | 2.93540200  | -1.13951800 |
| C  | 5.74158100  | -0.85743800 | -1.61875600 | C                 | -3.11403700 | 0.52953900  | -2.50329000 |
| H  | 5.52860000  | -2.47214500 | -0.20496900 | H                 | -2.91742700 | -0.54217200 | -2.61002500 |
| H  | 5.67063000  | 0.87105300  | -2.90672100 | H                 | -4.13910500 | 0.65155500  | -2.14120900 |

|   |             |             |             |
|---|-------------|-------------|-------------|
| H | -3.05032100 | 0.98021100  | -3.50133600 |
| C | -0.51810000 | 4.55915200  | -1.40573300 |
| H | -1.19588600 | 5.29938100  | -1.84506100 |
| H | 0.17890300  | 5.08043700  | -0.73962400 |
| H | 0.05375900  | 4.11537100  | -2.22731400 |
| O | -1.86806700 | 3.98663200  | 0.56529100  |
| C | -2.73233000 | 5.09879200  | 0.43886700  |
| H | -3.55264000 | 4.91911500  | -0.27202500 |
| H | -3.16454300 | 5.26463000  | 1.42951400  |
| H | -2.20104700 | 6.01115700  | 0.13347600  |
| C | -3.29840600 | 0.11204300  | 0.53640300  |
| C | -3.86099300 | -1.10532100 | 0.11872200  |
| C | -3.93999000 | 0.82108400  | 1.56708400  |
| C | -5.01925500 | -1.59974000 | 0.71491200  |
| H | -3.36747600 | -1.68261400 | -0.65627800 |
| C | -5.09958700 | 0.32605000  | 2.16444900  |
| H | -3.52968400 | 1.77673800  | 1.88075400  |
| C | -5.64401900 | -0.88615200 | 1.74020000  |
| H | -5.43141100 | -2.54965100 | 0.38392400  |
| H | -5.57756700 | 0.89057200  | 2.96093000  |
| H | -6.54578800 | -1.27464700 | 2.20593700  |
| O | 6.38828400  | 1.97376900  | 1.53333500  |
| C | 6.03191600  | 2.59200300  | 2.75971100  |
| H | 6.94180800  | 3.06692900  | 3.13107600  |
| H | 5.25689300  | 3.35657900  | 2.61611500  |
| H | 5.68014700  | 1.85637700  | 3.49493800  |

**61-ts-L3-c**

|   |             |             |             |
|---|-------------|-------------|-------------|
| C | -0.48226100 | 4.26011600  | 1.19877800  |
| C | -1.17299600 | 4.27819700  | 0.05197800  |
| C | -0.67960600 | 3.59223600  | -1.16932100 |
| C | 0.44003800  | 2.64891300  | -0.98890500 |
| C | 1.15946400  | 2.56263800  | 0.25877100  |
| C | 0.85996800  | 3.58245200  | 1.37594400  |
| H | -0.83959600 | 4.78598300  | 2.08284600  |
| H | -2.10262700 | 4.83229200  | -0.05393200 |
| H | 0.97189600  | 2.40360800  | -1.90739700 |
| H | 2.21778300  | 2.34267500  | 0.14658100  |
| O | -1.19718900 | 3.81061100  | -2.26698400 |
| O | 0.90521800  | 2.96043200  | 2.66667000  |
| C | 1.96835500  | 4.65030200  | 1.39834000  |
| H | 2.93376000  | 4.17315800  | 1.59655000  |
| H | 1.77165500  | 5.37296200  | 2.19695600  |
| H | 2.01587500  | 5.18478900  | 0.44460800  |
| C | 0.31409200  | 1.65508900  | 2.62548100  |
| H | -0.78206200 | 1.73533000  | 2.60282200  |
| H | 0.61035000  | 1.16471400  | 3.55946100  |
| C | 0.87225500  | 0.95523700  | 1.40921400  |
| C | 1.98352800  | 0.18368300  | 1.57876700  |
| H | 2.27244700  | -0.03291800 | 2.61119800  |
| C | 2.93603300  | -0.31410200 | 0.59294300  |
| C | 4.18354300  | -0.79164800 | 1.03838800  |
| C | 2.71799700  | -0.31001800 | -0.80513200 |
| C | 5.17555100  | -1.22018000 | 0.15833900  |
| H | 4.38684700  | -0.81419500 | 2.10657400  |
| C | 3.69742500  | -0.72739700 | -1.69416200 |
| H | 1.74664300  | -0.00123200 | -1.18894500 |
| C | 4.93909700  | -1.18370000 | -1.22229400 |

|    |             |             |             |
|----|-------------|-------------|-------------|
| H  | 6.12083600  | -1.57342600 | 0.55444800  |
| H  | 3.52125400  | -0.72494500 | -2.76569900 |
| C  | -1.59969900 | -0.01469200 | -1.96711100 |
| H  | -1.14346000 | 0.17902100  | -2.93448900 |
| C  | -2.41008000 | 0.90908300  | -1.32234300 |
| H  | -2.62616500 | 1.89056500  | -1.72985900 |
| C  | -1.72014600 | -1.44570000 | -1.44016300 |
| C  | -1.36047700 | -1.30112900 | 0.06545800  |
| C  | -2.13895700 | -0.32881700 | 0.68619800  |
| H  | -2.19051400 | -0.25302600 | 1.76735900  |
| C  | -3.21422900 | 0.29998700  | -0.18564100 |
| H  | -3.80965400 | 1.03759500  | 0.35668900  |
| Rh | -0.46205700 | 0.83313200  | -0.25560900 |
| C  | -3.23377600 | -1.85199400 | -1.49965400 |
| C  | -4.13607700 | -0.84712600 | -0.72155600 |
| H  | -3.53525200 | -1.91461100 | -2.55234700 |
| H  | -3.34281200 | -2.85412000 | -1.07040000 |
| C  | -0.86750900 | -2.42565900 | -2.24513400 |
| H  | 0.18235600  | -2.11548900 | -2.27384300 |
| H  | -0.91077600 | -3.43746900 | -1.83049600 |
| H  | -1.23028600 | -2.46757000 | -3.27939500 |
| C  | -5.25594900 | -0.27208800 | -1.59651400 |
| H  | -5.87691900 | -1.06076500 | -2.03532900 |
| H  | -5.90169400 | 0.38987500  | -1.00823800 |
| H  | -4.82993800 | 0.30544500  | -2.42341500 |
| O  | -4.66026000 | -1.43437100 | 0.48518000  |
| C  | -5.65564900 | -2.42919400 | 0.34505200  |
| H  | -5.33816900 | -3.25816800 | -0.30505600 |
| H  | -5.83444800 | -2.82671700 | 1.34798900  |
| H  | -6.60125900 | -2.02558200 | -0.04294200 |
| C  | -0.72671900 | -2.39600100 | 0.85254800  |
| C  | 0.56162400  | -2.89478100 | 0.59675700  |
| C  | -1.47150100 | -2.99175600 | 1.88895600  |
| C  | 1.08961900  | -3.93810000 | 1.35655600  |
| H  | 1.16768100  | -2.44697600 | -0.18124700 |
| C  | -0.94274000 | -4.03493100 | 2.64987400  |
| H  | -2.48418900 | -2.64421900 | 2.07166600  |
| C  | 0.34228600  | -4.51198400 | 2.38753300  |
| H  | 2.09405200  | -4.29612600 | 1.14607100  |
| H  | -1.53978100 | -4.47885300 | 3.44256400  |
| H  | 0.75696700  | -5.32488400 | 2.97798300  |
| O  | 5.83022300  | -1.57688400 | -2.17614800 |
| C  | 7.09740800  | -2.05707700 | -1.75664500 |
| H  | 7.63944200  | -2.30959100 | -2.66977400 |
| H  | 7.65645200  | -1.29074800 | -1.20340000 |
| H  | 7.00246000  | -2.95477900 | -1.13131800 |

**61-ts-L3-d**

|   |             |            |             |
|---|-------------|------------|-------------|
| C | -0.22721600 | 4.29405300 | 1.14761300  |
| C | -0.87709300 | 4.32872800 | -0.02262500 |
| C | -0.38601400 | 3.58705000 | -1.21183400 |
| C | 0.66695800  | 2.58141500 | -0.97241100 |
| C | 1.33835500  | 2.48028200 | 0.30019000  |
| C | 1.06496800  | 3.54131900 | 1.38473500  |
| H | -0.58094800 | 4.86002600 | 2.00802800  |
| H | -1.76698900 | 4.93565600 | -0.17156900 |
| H | 1.21287600  | 2.28293500 | -1.86674900 |
| H | 2.38376900  | 2.19158800 | 0.22935300  |

|    |             |             |             |              |             |             |             |
|----|-------------|-------------|-------------|--------------|-------------|-------------|-------------|
| O  | -0.85278800 | 3.80984500  | -2.33121300 | H            | 1.82772900  | -4.40411700 | 1.33704700  |
| O  | 1.03062700  | 2.94767100  | 2.68886800  | H            | -1.91469900 | -4.37746700 | 3.46003400  |
| C  | 2.23453900  | 4.54141900  | 1.42260300  | H            | 0.35108600  | -5.34973600 | 3.10521600  |
| H  | 3.16229200  | 4.01203400  | 1.66332900  | O            | 5.95670700  | -2.04245100 | -1.69850100 |
| H  | 2.05597000  | 5.29229700  | 2.19915900  | C            | 5.84972800  | -2.01108400 | -3.11276300 |
| H  | 2.34488800  | 5.05051100  | 0.46023800  | H            | 6.77412700  | -2.44964200 | -3.49296100 |
| C  | 0.36053500  | 1.68071600  | 2.65553200  | H            | 4.99555300  | -2.60368000 | -3.46665000 |
| H  | -0.72658900 | 1.82948100  | 2.59040700  | H            | 5.75433200  | -0.98330100 | -3.48711800 |
| H  | 0.59202000  | 1.19646700  | 3.61072400  |              |             |             |             |
| C  | 0.91588400  | 0.91758500  | 1.47662500  | <b>24-L4</b> |             |             |             |
| C  | 1.97232800  | 0.08577700  | 1.70154600  | C            | 2.41521500  | -1.91845400 | -1.02844300 |
| H  | 2.21023400  | -0.12546900 | 2.74794100  | C            | 2.76930200  | -2.21616400 | 0.30479900  |
| C  | 2.92657900  | -0.49084500 | 0.76147100  | C            | 3.37500100  | -0.88893300 | -1.64963100 |
| C  | 4.12048900  | -1.05654100 | 1.26770800  | C            | 3.22423900  | 0.27941700  | -0.68331400 |
| C  | 2.77105600  | -0.48691400 | -0.63827400 | C            | 3.60262500  | -0.02497000 | 0.64134200  |
| C  | 5.10365000  | -1.56155500 | 0.43298200  | C            | 4.02464400  | -1.49794700 | 0.78297000  |
| H  | 4.27475000  | -1.08354500 | 2.34387800  | H            | 4.26774100  | -1.74795100 | 1.81791700  |
| C  | 3.75571300  | -0.98460100 | -1.49308200 | Rh           | 1.48875500  | -0.48459900 | 0.33414800  |
| H  | 1.84237100  | -0.11332100 | -1.06712900 | C            | 4.82718900  | -1.44411300 | -1.62416900 |
| C  | 4.93446700  | -1.52346200 | -0.96100000 | C            | 5.22329100  | -1.79276100 | -0.16269600 |
| H  | 6.01818400  | -1.98907700 | 0.83234200  | H            | 4.88626600  | -2.32784400 | -2.27040500 |
| H  | 3.58679000  | -0.96137800 | -2.56398200 | H            | 5.50515200  | -0.69256600 | -2.04563700 |
| C  | -1.49692500 | 0.03805400  | -1.96743200 | H            | 3.07499000  | -0.61901400 | -2.66432800 |
| H  | -1.00109300 | 0.18987400  | -2.92279100 | H            | 5.49863200  | -2.85014900 | -0.07236900 |
| C  | -2.27044800 | 1.01774300  | -1.36024200 | H            | 6.09109000  | -1.20649100 | 0.16156800  |
| H  | -2.41484900 | 2.00380900  | -1.78788200 | C            | 1.54932100  | -2.76242400 | -1.88982500 |
| C  | -1.72151700 | -1.37580500 | -1.42777300 | C            | 0.81095700  | -2.19423600 | -2.94405600 |
| C  | -1.40528400 | -1.23295000 | 0.08726000  | C            | 1.46361600  | -4.15174200 | -1.69857900 |
| C  | -2.14287800 | -0.20797400 | 0.67025500  | C            | 0.00932600  | -2.98309400 | -3.76665800 |
| H  | -2.22439700 | -0.11493800 | 1.74823600  | H            | 0.84993200  | -1.11957500 | -3.09918100 |
| C  | -3.14748700 | 0.47326500  | -0.24517900 | C            | 0.66097100  | -4.94328800 | -2.52135600 |
| H  | -3.71612600 | 1.25186700  | 0.26777200  | H            | 2.04377800  | -4.61712200 | -0.90705300 |
| Rh | -0.36666100 | 0.84251400  | -0.23192100 | C            | -0.07086700 | -4.36319600 | -3.55837300 |
| C  | -3.25425800 | -1.69041500 | -1.53621200 | H            | -0.55648000 | -2.52035900 | -4.57136900 |
| C  | -4.11916700 | -0.62069200 | -0.80274600 | H            | 0.61437600  | -6.01647700 | -2.35489200 |
| H  | -3.52236600 | -1.74902100 | -2.59813200 | H            | -0.69400300 | -4.97902000 | -4.20131500 |
| H  | -3.44009200 | -2.67795700 | -1.09950100 | C            | 3.98439000  | 0.97219800  | 1.67248400  |
| C  | -0.90028800 | -2.41556700 | -2.18886800 | C            | 3.77523300  | 0.71017000  | 3.03868200  |
| H  | 0.16621100  | -2.16702200 | -2.17933500 | C            | 4.59347100  | 2.18787300  | 1.31713200  |
| H  | -1.01822400 | -3.41721200 | -1.76427000 | C            | 4.15305500  | 1.63299600  | 4.01126900  |
| H  | -1.22567800 | -2.45022500 | -3.23577100 | H            | 3.28536900  | -0.21362400 | 3.33372600  |
| C  | -5.16486200 | 0.01552000  | -1.72654700 | C            | 4.97396900  | 3.11249000  | 2.29135300  |
| H  | -5.81932800 | -0.73466500 | -2.18390500 | H            | 4.78416700  | 2.40153600  | 0.26919800  |
| H  | -5.78802300 | 0.72512700  | -1.17023100 | C            | 4.75485200  | 2.83953300  | 3.64210800  |
| H  | -4.67007400 | 0.55484400  | -2.54095900 | H            | 3.97225600  | 1.41307700  | 5.06022000  |
| O  | -4.72505100 | -1.15780200 | 0.38821400  | H            | 5.44767700  | 4.04413800  | 1.99254600  |
| C  | -5.77689700 | -2.08775000 | 0.21850300  | H            | 5.05147500  | 3.55817100  | 4.40140000  |
| H  | -5.48715900 | -2.94531600 | -0.40702800 | H            | 3.13377300  | 1.29942300  | -1.04659300 |
| H  | -6.02333500 | -2.45724300 | 1.21777300  | H            | 2.38703400  | -3.08491100 | 0.83371000  |
| H  | -6.67668600 | -1.62926500 | -0.21479700 | O            | 0.39802800  | 1.21309000  | 0.88144800  |
| C  | -0.86826200 | -2.35507800 | 0.90671000  | C            | 0.83964100  | 2.53563000  | 0.69456900  |
| C  | 0.40112100  | -2.92441600 | 0.71219400  | H            | 0.92438200  | 2.80901300  | -0.36752900 |
| C  | -1.69255600 | -2.90297600 | 1.90855100  | H            | 0.13671100  | 3.23654800  | 1.16861300  |
| C  | 0.83540100  | -3.99116900 | 1.49844800  | H            | 1.81986800  | 2.67378500  | 1.16960500  |
| H  | 1.06556600  | -2.51231400 | -0.03741100 | C            | -2.41567400 | 1.91913400  | -1.02687600 |
| C  | -1.25811300 | -3.97047900 | 2.69510000  | C            | -2.76941600 | 2.21567600  | 0.30669000  |
| H  | -2.69149000 | -2.49825800 | 2.04337000  | C            | -3.37538500 | 0.88978600  | -1.64846700 |
| C  | 0.00969400  | -4.51825300 | 2.49410200  | C            | -3.22399700 | -0.27919700 | -0.68300100 |

|    |             |             |             |
|----|-------------|-------------|-------------|
| C  | -3.60210000 | 0.02411300  | 0.64201200  |
| C  | -4.02442900 | 1.49690200  | 0.78476200  |
| H  | -4.26727500 | 1.74614500  | 1.81995500  |
| Rh | -1.48836200 | 0.48451000  | 0.33437600  |
| C  | -4.82773500 | 1.44448400  | -1.62215100 |
| C  | -5.22345800 | 1.79203000  | -0.16031800 |
| H  | -4.88732300 | 2.32861400  | -2.26778200 |
| H  | -5.50560800 | 0.69299500  | -2.04388100 |
| H  | -3.07566300 | 0.62058200  | -2.66343600 |
| H  | -5.49908100 | 2.84927000  | -0.06917100 |
| H  | -6.09097700 | 1.20528100  | 0.16384900  |
| C  | -1.55029800 | 2.76403200  | -1.88781900 |
| C  | -0.81290200 | 2.19711000  | -2.94339300 |
| C  | -1.46403700 | 4.15305200  | -1.69472200 |
| C  | -0.01169600 | 2.98686900  | -3.76553900 |
| H  | -0.85230100 | 1.12268600  | -3.10001800 |
| C  | -0.66183300 | 4.94551000  | -2.51702700 |
| H  | -2.04347900 | 4.61752600  | -0.90215200 |
| C  | 0.06903800  | 4.36665800  | -3.55542300 |
| H  | 0.55335500  | 2.52508400  | -4.57132500 |
| H  | -0.61483100 | 6.01846100  | -2.34914300 |
| H  | 0.69182400  | 4.98320800  | -4.19801000 |
| C  | -3.98366800 | -0.97382100 | 1.67250500  |
| C  | -3.77431900 | -0.71275800 | 3.03886900  |
| C  | -4.59283600 | -2.18926200 | 1.31639400  |
| C  | -4.15203800 | -1.63624900 | 4.01086300  |
| H  | -3.28440200 | 0.21082500  | 3.33448400  |
| C  | -4.97322400 | -3.11454400 | 2.29004200  |
| H  | -4.78367700 | -2.40218400 | 0.26832600  |
| C  | -4.75391800 | -2.84251200 | 3.64095600  |
| H  | -3.97109700 | -1.41705500 | 5.05993900  |
| H  | -5.44699300 | -4.04597500 | 1.99064800  |
| H  | -5.05045500 | -3.56167000 | 4.39978900  |
| H  | -3.13351900 | -1.29895000 | -1.04703700 |
| H  | -2.38715800 | 3.08405600  | 0.83620000  |
| O  | -0.39748100 | -1.21293700 | 0.88166400  |
| C  | -0.83877700 | -2.53560800 | 0.69422700  |
| H  | -0.91951900 | -2.80973700 | -0.36796500 |
| H  | -0.13771100 | -3.23619500 | 1.17156400  |
| H  | -1.82078100 | -2.67310300 | 1.16573300  |

#### 25-L4

|    |             |             |             |
|----|-------------|-------------|-------------|
| C  | 1.56746600  | 0.67595600  | 0.09345800  |
| C  | 0.78877700  | 0.73696900  | 1.26439000  |
| C  | 0.88004400  | 1.40127100  | -1.07312600 |
| C  | -0.42500000 | 0.61417200  | -1.14593400 |
| C  | -1.22672000 | 0.70675100  | 0.03620600  |
| C  | -0.50521900 | 1.52722900  | 1.11643200  |
| H  | -1.07080200 | 1.55454100  | 2.04994700  |
| Rh | 0.09630000  | -0.98352200 | 0.10906400  |
| C  | 0.60480200  | 2.88847500  | -0.71830100 |
| C  | -0.22462600 | 2.96423500  | 0.59343700  |
| H  | 1.55849200  | 3.41803400  | -0.61102800 |
| H  | 0.06823100  | 3.36169100  | -1.54919200 |
| H  | 1.44080700  | 1.30650700  | -2.00459800 |
| H  | 0.31472600  | 3.52325800  | 1.36651400  |
| H  | -1.17740500 | 3.48092600  | 0.42875400  |
| C  | 2.98639300  | 0.25227100  | 0.06284400  |

|   |             |             |             |
|---|-------------|-------------|-------------|
| C | 3.87623200  | 0.73287400  | -0.91406300 |
| C | 3.49545300  | -0.63949000 | 1.02961800  |
| C | 5.21592500  | 0.34262000  | -0.92417600 |
| H | 3.52760800  | 1.43151000  | -1.66816900 |
| C | 4.83097700  | -1.03151400 | 1.01693800  |
| H | 2.83075600  | -1.04125100 | 1.78980100  |
| C | 5.70127100  | -0.54222500 | 0.03864600  |
| H | 5.88115900  | 0.73438800  | -1.68928700 |
| H | 5.19281000  | -1.72592800 | 1.77070800  |
| H | 6.74320600  | -0.84977800 | 0.02735700  |
| C | -2.69283000 | 0.49110300  | 0.07773000  |
| C | -3.33618100 | 0.14904400  | 1.28178600  |
| C | -3.48473200 | 0.64268800  | -1.07377800 |
| C | -4.71533200 | -0.03812300 | 1.33059800  |
| H | -2.74423600 | 0.00366300  | 2.18094900  |
| C | -4.86704900 | 0.45827000  | -1.02493900 |
| H | -3.01748700 | 0.92699200  | -2.01183700 |
| C | -5.48875100 | 0.11708700  | 0.17663400  |
| H | -5.18784300 | -0.31022400 | 2.27066500  |
| H | -5.45792300 | 0.58714000  | -1.92798100 |
| H | -6.56506500 | -0.02653300 | 0.21542200  |
| H | -0.84486700 | 0.32830300  | -2.10681400 |
| H | 1.19837800  | 0.53108600  | 2.24958400  |
| O | -0.77723300 | -2.63335100 | -0.38372300 |
| C | -1.96387100 | -2.92300400 | -1.05723000 |
| H | -1.88686000 | -2.73322900 | -2.14261100 |
| H | -2.20174600 | -3.99095400 | -0.92838600 |
| H | -2.81975300 | -2.34481400 | -0.67093500 |

#### 26-L4

|    |             |             |             |
|----|-------------|-------------|-------------|
| C  | 0.72120100  | 1.77572200  | -0.03661700 |
| C  | 0.26126400  | 1.25644300  | 1.18657400  |
| C  | -0.34898400 | 2.64705600  | -0.71455500 |
| C  | -1.51140200 | 1.66892000  | -0.83035000 |
| C  | -1.97949500 | 1.18478700  | 0.41466600  |
| C  | -1.13509100 | 1.72731200  | 1.57770600  |
| H  | -1.45292000 | 1.31153600  | 2.53582600  |
| Rh | -0.39506000 | -0.09680500 | -0.36891700 |
| C  | -0.72040500 | 3.83293200  | 0.22103900  |
| C  | -1.20469000 | 3.28208300  | 1.58934100  |
| H  | 0.15556300  | 4.48018500  | 0.34278300  |
| H  | -1.50050900 | 4.43454200  | -0.25946600 |
| H  | -0.01900700 | 3.00356500  | -1.69190000 |
| H  | -0.58143900 | 3.65927400  | 2.40821200  |
| H  | -2.23433300 | 3.59369200  | 1.79941700  |
| C  | 2.14291100  | 1.86173900  | -0.45157100 |
| C  | 3.16400200  | 1.99921600  | 0.50291900  |
| C  | 2.49935500  | 1.84277800  | -1.81179500 |
| C  | 4.49940000  | 2.10347500  | 0.11310400  |
| H  | 2.90849400  | 2.03676500  | 1.55776800  |
| C  | 3.83325700  | 1.94164100  | -2.20120300 |
| H  | 1.72901200  | 1.71286200  | -2.56653000 |
| C  | 4.83965500  | 2.07285100  | -1.24026100 |
| H  | 5.27314200  | 2.21191000  | 0.86857400  |
| H  | 4.08830800  | 1.91060900  | -3.25710200 |
| H  | 5.87959100  | 2.15353800  | -1.54512600 |
| C  | -3.31723500 | 0.58719600  | 0.64447000  |
| C  | -3.52310500 | -0.33723000 | 1.68450500  |

|   |             |             |             |
|---|-------------|-------------|-------------|
| C | -4.41858100 | 0.94399600  | -0.15297700 |
| C | -4.77957200 | -0.89401700 | 1.90974100  |
| H | -2.68190700 | -0.64218800 | 2.30062400  |
| C | -5.67851000 | 0.38850000  | 0.07421800  |
| H | -4.29096200 | 1.67741600  | -0.94389500 |
| C | -5.86387800 | -0.53410400 | 1.10458100  |
| H | -4.91238900 | -1.61543000 | 2.71149900  |
| H | -6.51644400 | 0.68291500  | -0.55216300 |
| H | -6.84423800 | -0.96783300 | 1.28136400  |
| H | -2.10335500 | 1.61102300  | -1.73957400 |
| H | 0.92371300  | 0.79468500  | 1.91283100  |
| O | -1.32694100 | -1.64387400 | -1.41133200 |
| C | -2.36480800 | -1.52650700 | -2.36830800 |
| H | -2.01121000 | -1.01521700 | -3.27400100 |
| H | -2.71165000 | -2.53118300 | -2.63490300 |
| H | -3.19566400 | -0.96585700 | -1.92954500 |
| C | 0.58449500  | -2.32339900 | 0.77807400  |
| C | 1.48688600  | -2.25040100 | 1.85112100  |
| C | 2.81585900  | -1.89777900 | 1.59966300  |
| C | 3.22889700  | -1.61451600 | 0.28326000  |
| C | 2.32012000  | -1.68344800 | -0.75887900 |
| C | 0.96147900  | -2.05116300 | -0.56094400 |
| H | -0.42426900 | -2.67922700 | 0.97349100  |
| H | 1.14989300  | -2.49193400 | 2.85357800  |
| H | 4.26517800  | -1.33566900 | 0.11837200  |
| H | 2.64604200  | -1.46818400 | -1.77206900 |
| B | -0.04674500 | -2.42042800 | -1.82060300 |
| O | -0.46693200 | -3.80497600 | -1.90176000 |
| H | 0.30118200  | -4.34899000 | -2.12526000 |
| O | 0.52307200  | -1.89493600 | -3.04732100 |
| H | 0.15359500  | -2.40568100 | -3.78190400 |
| O | 3.78718800  | -1.80089600 | 2.55384900  |
| C | 3.44626400  | -2.10965100 | 3.89464400  |
| H | 4.36112600  | -1.97762700 | 4.47569000  |
| H | 2.67120000  | -1.43397200 | 4.28160900  |
| H | 3.09885300  | -3.14631500 | 3.99561600  |

**27-ts-L4**

|    |             |             |             |
|----|-------------|-------------|-------------|
| C  | -0.22001500 | 1.92767600  | -0.17333400 |
| C  | 0.14856900  | 1.22039600  | -1.33849200 |
| C  | 0.97946900  | 2.68695700  | 0.42041300  |
| C  | 1.99666800  | 1.57725900  | 0.64190000  |
| C  | 2.36709700  | 0.90021500  | -0.52312000 |
| C  | 1.60321900  | 1.42543800  | -1.75050800 |
| H  | 1.85350400  | 0.86583100  | -2.65385800 |
| Rh | 0.53567700  | -0.06190200 | 0.32727700  |
| C  | 1.51472500  | 3.70187100  | -0.63283400 |
| C  | 1.90413000  | 2.94256000  | -1.92997800 |
| H  | 0.74200700  | 4.45346500  | -0.83139300 |
| H  | 2.37794100  | 4.23061500  | -0.21244000 |
| H  | 0.71876500  | 3.19121400  | 1.35271100  |
| H  | 1.33876500  | 3.31810800  | -2.79059100 |
| H  | 2.96750200  | 3.07451300  | -2.16139300 |
| C  | -1.60343900 | 2.32468200  | 0.18813500  |
| C  | -2.58872700 | 2.50624400  | -0.79658000 |
| C  | -1.95481800 | 2.56671100  | 1.52866800  |
| C  | -3.88087700 | 2.90612500  | -0.45488100 |
| H  | -2.33546600 | 2.34700700  | -1.84045700 |

|   |             |             |             |
|---|-------------|-------------|-------------|
| C | -3.24533800 | 2.96521300  | 1.87135200  |
| H | -1.21648400 | 2.41062700  | 2.31010100  |
| C | -4.21575100 | 3.13739000  | 0.88028800  |
| H | -4.62404500 | 3.04566400  | -1.23591400 |
| H | -3.49520500 | 3.13861900  | 2.91490900  |
| H | -5.22092400 | 3.45317400  | 1.14689500  |
| C | 3.55926000  | 0.02778300  | -0.65575300 |
| C | 3.58525400  | -1.02106800 | -1.59294000 |
| C | 4.69903900  | 0.22937100  | 0.14307500  |
| C | 4.70251000  | -1.84397700 | -1.71763300 |
| H | 2.70909400  | -1.20867200 | -2.20704100 |
| C | 5.81826600  | -0.59456300 | 0.01842800  |
| H | 4.71504600  | 1.05252500  | 0.85181000  |
| C | 5.82479200  | -1.63546700 | -0.91153100 |
| H | 4.69504400  | -2.65418800 | -2.44190600 |
| H | 6.68952200  | -0.41584700 | 0.64331800  |
| H | 6.69666700  | -2.27632100 | -1.01044300 |
| H | 2.55052000  | 1.50196000  | 1.57331400  |
| H | -0.58257100 | 0.84352400  | -2.04777300 |
| O | 1.10182600  | -1.70738200 | 1.54538600  |
| C | 2.08638000  | -1.66287500 | 2.57823800  |
| H | 1.76044000  | -1.02006400 | 3.40198400  |
| H | 2.25769000  | -2.67897700 | 2.95161300  |
| H | 3.01163800  | -1.27996700 | 2.14125500  |
| C | -1.11100500 | -2.22877000 | -0.91376200 |
| C | -2.21442600 | -2.64395800 | -1.64697900 |
| C | -3.49827400 | -2.19646100 | -1.29042300 |
| C | -3.65223400 | -1.33828700 | -0.19453600 |
| C | -2.52059000 | -0.92329600 | 0.51525900  |
| C | -1.21605500 | -1.34500700 | 0.19440000  |
| H | -0.13377600 | -2.62009600 | -1.18836300 |
| H | -2.11902900 | -3.32131100 | -2.49126400 |
| H | -4.63290200 | -0.98403600 | 0.10498800  |
| H | -2.66249400 | -0.25819100 | 1.36248400  |
| B | -0.26690200 | -2.07201100 | 1.88623800  |
| O | -0.49441000 | -3.45764700 | 1.78904600  |
| H | -1.43116300 | -3.65374200 | 1.65478800  |
| O | -0.78324700 | -1.34540400 | 2.98119600  |
| H | -1.40208000 | -1.89978100 | 3.47531200  |
| O | -4.52307300 | -2.66340500 | -2.06294500 |
| C | -5.83995500 | -2.23274900 | -1.76437200 |
| H | -6.48728700 | -2.71247000 | -2.50134800 |
| H | -6.14911800 | -2.54099600 | -0.75651500 |
| H | -5.93859300 | -1.14231200 | -1.84988800 |

**28-L4**

|    |             |            |             |
|----|-------------|------------|-------------|
| C  | -0.37185600 | 2.03624500 | -0.04069200 |
| C  | 0.12591900  | 1.49155200 | -1.25501500 |
| C  | 0.75219100  | 2.73604700 | 0.74530600  |
| C  | 1.82388900  | 1.66630800 | 0.89310100  |
| C  | 2.31123200  | 1.16822800 | -0.29865100 |
| C  | 1.59966000  | 1.79543400 | -1.50759500 |
| H  | 1.94887400  | 1.36956400 | -2.45049600 |
| Rh | 0.31821100  | 0.01490200 | 0.23359600  |
| C  | 1.30736800  | 3.90583000 | -0.12484600 |
| C  | 1.82831000  | 3.33862200 | -1.47330900 |
| H  | 0.50951900  | 4.63972000 | -0.28610500 |
| H  | 2.10856600  | 4.41404000 | 0.42392000  |

|   |             |             |             |
|---|-------------|-------------|-------------|
| H | 0.40386100  | 3.09997800  | 1.71395900  |
| H | 1.30238200  | 3.79361200  | -2.32059700 |
| H | 2.89544300  | 3.55053400  | -1.60653500 |
| C | -1.78706900 | 2.41709100  | 0.20809700  |
| C | -2.65041700 | 2.74968000  | -0.84861100 |
| C | -2.28993500 | 2.49399100  | 1.51907500  |
| C | -3.97077700 | 3.13053800  | -0.60658100 |
| H | -2.28046600 | 2.72292100  | -1.86934600 |
| C | -3.60707200 | 2.87479100  | 1.76310000  |
| H | -1.64665100 | 2.22578500  | 2.35273900  |
| C | -4.45594700 | 3.19423000  | 0.69992400  |
| H | -4.61851400 | 3.38372300  | -1.44209600 |
| H | -3.97490700 | 2.91623000  | 2.78512900  |
| H | -5.48387100 | 3.49129800  | 0.88976600  |
| C | 3.52738700  | 0.33494900  | -0.44394600 |
| C | 3.64193800  | -0.60528700 | -1.48466900 |
| C | 4.60761700  | 0.46883300  | 0.44770100  |
| C | 4.78504300  | -1.39158400 | -1.61791500 |
| H | 2.81507200  | -0.73814400 | -2.17631800 |
| C | 5.75141500  | -0.31883900 | 0.31447800  |
| H | 4.55743000  | 1.21552800  | 1.23531100  |
| C | 5.84511900  | -1.25371700 | -0.71813000 |
| H | 4.84623800  | -2.11702500 | -2.42488600 |
| H | 6.57539200  | -0.19255200 | 1.01209700  |
| H | 6.73716400  | -1.86483500 | -0.82468500 |
| H | 2.28824700  | 1.46672900  | 1.85454600  |
| H | -0.52944200 | 1.25979900  | -2.09023000 |
| O | 1.14355400  | -1.86320900 | 1.29355800  |
| C | 1.93895300  | -1.67367500 | 2.47551800  |
| H | 1.39332200  | -0.99098400 | 3.13003300  |
| H | 2.09517500  | -2.63012400 | 2.97851000  |
| H | 2.90711000  | -1.24038800 | 2.20835400  |
| C | -2.14131200 | -1.08721900 | -1.25702000 |
| C | -3.36190900 | -1.76978400 | -1.37780900 |
| C | -3.95275500 | -2.33289100 | -0.24434200 |
| C | -3.30459600 | -2.21816400 | 0.99418100  |
| C | -2.08597500 | -1.55359700 | 1.08586000  |
| C | -1.46031300 | -0.95468700 | -0.03405100 |
| H | -1.72093700 | -0.65393800 | -2.16283200 |
| H | -3.83376700 | -1.84705900 | -2.35194700 |
| H | -3.77397300 | -2.66399400 | 1.86718700  |
| H | -1.60634700 | -1.50025700 | 2.06172700  |
| B | 1.28835000  | -3.03441500 | 0.54732000  |
| O | 0.52816200  | -3.25025200 | -0.55422400 |
| H | -0.16809700 | -2.56920600 | -0.66189000 |
| O | 2.21762400  | -3.95071800 | 0.96122900  |
| H | 2.19689900  | -4.72476300 | 0.38030000  |
| O | -5.14298200 | -3.01380000 | -0.23486000 |
| C | -5.83549000 | -3.15596400 | -1.46000600 |
| H | -5.24391400 | -3.71273900 | -2.20030800 |
| H | -6.74364200 | -3.71809300 | -1.23113000 |
| H | -6.11198600 | -2.18181900 | -1.88712500 |

**29-L4**

|   |             |            |             |
|---|-------------|------------|-------------|
| C | -0.10208100 | 1.77197200 | 0.04408400  |
| C | -0.53865000 | 1.03514500 | 1.19313100  |
| C | -1.30735200 | 2.30668500 | -0.75254400 |
| C | -2.13427500 | 1.06548800 | -1.04865500 |

|    |             |             |             |
|----|-------------|-------------|-------------|
| C  | -2.56012700 | 0.37660800  | 0.06818500  |
| C  | -2.05525100 | 1.02613600  | 1.36692000  |
| H  | -2.36039700 | 0.46267900  | 2.25048800  |
| Rh | -0.34121900 | -0.30512400 | -0.39359700 |
| C  | -2.12218000 | 3.26616600  | 0.16800100  |
| C  | -2.58300500 | 2.49267300  | 1.43333600  |
| H  | -1.49599000 | 4.12512200  | 0.43511500  |
| H  | -2.98154600 | 3.65407900  | -0.39040800 |
| H  | -0.99123900 | 2.81351600  | -1.66669800 |
| H  | -2.20097700 | 2.96661500  | 2.34492300  |
| H  | -3.67597900 | 2.47871300  | 1.51242600  |
| C  | 1.20528600  | 2.46919300  | -0.06237600 |
| C  | 1.86890500  | 2.94940900  | 1.07948000  |
| C  | 1.79429900  | 2.70484400  | -1.31778700 |
| C  | 3.08386700  | 3.62999500  | 0.97230000  |
| H  | 1.42136900  | 2.80285700  | 2.05835100  |
| C  | 3.00528000  | 3.38307900  | -1.42616800 |
| H  | 1.30772700  | 2.32386100  | -2.21153100 |
| C  | 3.65756900  | 3.84868400  | -0.28011200 |
| H  | 3.57686300  | 3.99416800  | 1.87004600  |
| H  | 3.44666700  | 3.54318000  | -2.40639700 |
| H  | 4.60267400  | 4.37815000  | -0.36531900 |
| C  | -3.54979300 | -0.72679700 | 0.06669600  |
| C  | -3.52516600 | -1.72408100 | 1.05962200  |
| C  | -4.54436600 | -0.80682800 | -0.92511500 |
| C  | -4.44973000 | -2.76721000 | 1.05205400  |
| H  | -2.75876200 | -1.69539200 | 1.82893500  |
| C  | -5.46865300 | -1.85049100 | -0.93273200 |
| H  | -4.60418000 | -0.03074600 | -1.68275900 |
| C  | -5.42574000 | -2.83663300 | 0.05526900  |
| H  | -4.40470500 | -3.52999300 | 1.82491300  |
| H  | -6.23082000 | -1.88721800 | -1.70681500 |
| H  | -6.14858600 | -3.64784700 | 0.05152400  |
| H  | -2.48212200 | 0.84786200  | -2.05418300 |
| H  | 0.10723400  | 0.87964000  | 2.05385300  |
| C  | 2.63625500  | -0.73863500 | 0.49677700  |
| C  | 3.75777500  | -1.57490400 | 0.55014600  |
| C  | 3.70280700  | -2.85459600 | -0.01693600 |
| C  | 2.52192500  | -3.28904600 | -0.63457100 |
| C  | 1.41716300  | -2.44154000 | -0.67308600 |
| C  | 1.44324600  | -1.14712200 | -0.11217700 |
| H  | 2.71375600  | 0.25434200  | 0.93253800  |
| H  | 4.66442600  | -1.21840900 | 1.02810200  |
| H  | 2.49505400  | -4.28467000 | -1.06841800 |
| H  | 0.50649500  | -2.81299700 | -1.15681800 |
| O  | 4.73983400  | -3.75143200 | -0.02157400 |
| C  | 5.95310300  | -3.36984500 | 0.59838600  |
| H  | 5.81429400  | -3.15597400 | 1.66730200  |
| H  | 6.62944400  | -4.22028500 | 0.48752700  |
| H  | 6.39881700  | -2.48935400 | 0.11502800  |

**33-L4**

|   |             |            |             |
|---|-------------|------------|-------------|
| C | -1.81069400 | 1.67365500 | 0.78127100  |
| C | -1.74047400 | 1.94879600 | -0.59542100 |
| C | -0.60833800 | 2.28733800 | 1.51436600  |
| C | 0.61942800  | 1.77049600 | 0.77873400  |
| C | 0.67051900  | 2.10656800 | -0.55841600 |
| C | -0.58963000 | 2.85856900 | -0.99918900 |



|    |             |             |             |                 |             |             |             |
|----|-------------|-------------|-------------|-----------------|-------------|-------------|-------------|
| H  | -0.58661000 | 3.06179900  | -2.07188800 | H               | 6.16899300  | -3.68286300 | -0.46591600 |
| Rh | -0.62879400 | 0.08903600  | -0.29784500 | C               | 2.37609100  | -1.22190500 | 0.16570200  |
| C  | -0.67806500 | 3.83859900  | 1.33815500  | H               | 2.33328800  | -1.36784000 | 1.25569700  |
| C  | -0.66946000 | 4.18340400  | -0.17512700 | H               | 2.80628800  | -0.22844400 | -0.01560800 |
| H  | -1.58592100 | 4.21168100  | 1.82504300  | C               | 1.01855800  | -1.30068000 | -0.39786800 |
| H  | 0.17638500  | 4.29486100  | 1.85108700  | C               | 0.09334700  | -1.80247100 | -1.06966700 |
| H  | -0.58830300 | 2.01674500  | 2.57069200  | H               | -0.44712300 | -2.54000300 | -1.62702100 |
| H  | -1.57878500 | 4.72329200  | -0.46193400 | O               | -5.89997000 | -3.24637300 | -0.98078000 |
| H  | 0.18139000  | 4.82491700  | -0.43157300 | C               | -6.68657900 | -3.15977500 | -2.15197100 |
| C  | -3.03475900 | 1.31289500  | 1.53669800  | H               | -7.54737300 | -3.81223800 | -1.98855600 |
| C  | -4.31393100 | 1.59683900  | 1.02883100  | H               | -7.04076700 | -2.13460400 | -2.33140500 |
| C  | -2.94957200 | 0.70237800  | 2.80108200  | H               | -6.13744500 | -3.50432500 | -3.03983600 |
| C  | -5.46224400 | 1.27080500  | 1.74875600  |                 |             |             |             |
| H  | -4.40990800 | 2.08854200  | 0.06588900  | <b>34-ts-L4</b> |             |             |             |
| C  | -4.09612100 | 0.38006500  | 3.52379300  | C               | 4.37478800  | -1.66488300 | -2.15787400 |
| H  | -1.97550500 | 0.45125500  | 3.21135300  | C               | 5.47525400  | -0.91505300 | -2.00649500 |
| C  | -5.36004100 | 0.66123600  | 3.00022100  | C               | 6.32397500  | -1.01140200 | -0.79412400 |
| H  | -6.43962400 | 1.50055700  | 1.33249900  | C               | 5.85569700  | -1.94047900 | 0.26238100  |
| H  | -4.00239600 | -0.09784000 | 4.49558500  | C               | 4.75392300  | -2.68764600 | 0.10698900  |
| H  | -6.25505800 | 0.40956000  | 3.56265600  | C               | 3.92083600  | -2.70116600 | -1.15477500 |
| C  | 1.87890600  | 2.06373600  | -1.41580200 | H               | 3.75208400  | -1.57932500 | -3.04728700 |
| C  | 1.78392000  | 1.77954700  | -2.79021700 | H               | 5.79731500  | -0.19825100 | -2.75711000 |
| C  | 3.14778900  | 2.35157400  | -0.88246400 | H               | 6.45524900  | -1.97207600 | 1.16814300  |
| C  | 2.91885300  | 1.76793800  | -3.59782000 | H               | 4.41255300  | -3.35871500 | 0.89387300  |
| H  | 0.81522000  | 1.53760000  | -3.21769600 | O               | 7.34900700  | -0.34968600 | -0.66718900 |
| C  | 4.28479200  | 2.34454100  | -1.69298100 | O               | 2.52395900  | -2.53990600 | -0.85125400 |
| H  | 3.23798400  | 2.60893700  | 0.16915700  | C               | 4.00038900  | -4.10067900 | -1.80008900 |
| C  | 4.17511200  | 2.05102900  | -3.05323500 | H               | 3.63310300  | -4.85122900 | -1.09309900 |
| H  | 2.82399300  | 1.53521500  | -4.65504200 | H               | 3.36716100  | -4.12954900 | -2.69245800 |
| H  | 5.25322100  | 2.58487000  | -1.26183600 | H               | 5.02980000  | -4.34168900 | -2.08016000 |
| H  | 5.05805000  | 2.05197100  | -3.68667500 | C               | 2.17404800  | -1.31078300 | -0.21164700 |
| H  | 1.47363000  | 1.38312500  | 1.32510700  | H               | 2.70262600  | -1.20639700 | 0.74601300  |
| H  | -2.59548400 | 1.82652100  | -1.25212300 | H               | 2.45853400  | -0.44969700 | -0.83163900 |
| C  | -2.80357200 | -1.91979200 | 0.40132000  | C               | 0.70155000  | -1.32192500 | 0.00543300  |
| C  | -3.99418700 | -2.62781500 | 0.25014400  | C               | -0.36299800 | -2.02962100 | -0.04227000 |
| C  | -4.74390000 | -2.50665100 | -0.92677300 | H               | -0.72664000 | -3.03255800 | -0.19892300 |
| C  | -4.28111800 | -1.67119700 | -1.94689500 | Rh              | -1.20317300 | -0.17454300 | -0.05946300 |
| C  | -3.08104300 | -0.96383500 | -1.77450900 | C               | 0.48112300  | 0.47689000  | 1.03892000  |
| C  | -2.32402300 | -1.05695500 | -0.59998900 | C               | 1.30978000  | 1.55680100  | 0.66232100  |
| H  | -2.24725200 | -2.03807700 | 1.32791400  | C               | 0.45100700  | 0.13278300  | 2.40127600  |
| H  | -4.36227800 | -3.28339200 | 1.03464000  | C               | 2.02256100  | 2.28259600  | 1.60739900  |
| H  | -4.83256200 | -1.56195000 | -2.87524600 | H               | 1.38203400  | 1.84894500  | -0.38111800 |
| H  | -2.74202000 | -0.33241600 | -2.59350800 | C               | 1.14671400  | 0.86952800  | 3.36791000  |
| C  | 5.29452200  | -1.09595000 | -0.06438800 | H               | -0.12303200 | -0.73277500 | 2.71989000  |
| C  | 5.98637900  | -0.52569400 | 0.93224500  | C               | 1.93960700  | 1.95116300  | 2.97042600  |
| C  | 5.98747600  | -1.08552900 | 2.30516000  | H               | 2.64812900  | 3.12144100  | 1.31650300  |
| C  | 5.14312000  | -2.28459100 | 2.52520200  | H               | 1.07806800  | 0.57733400  | 4.41026500  |
| C  | 4.45423900  | -2.85362500 | 1.52589700  | C               | -2.03723100 | 1.76692800  | -0.98894100 |
| C  | 4.50729200  | -2.37677900 | 0.09202500  | C               | -2.53442000 | 1.58495300  | 0.30236300  |
| H  | 5.28250900  | -0.66119200 | -1.06248400 | C               | -2.88669200 | 1.01303900  | -2.02363800 |
| H  | 6.57072900  | 0.37928400  | 0.78823800  | C               | -2.89633600 | -0.42466700 | -1.52879600 |
| H  | 5.11234200  | -2.66579300 | 3.54241800  | C               | -3.42818500 | -0.59021500 | -0.25177700 |
| H  | 3.82623400  | -3.72631900 | 1.69893100  | C               | -3.81731800 | 0.76413200  | 0.36641900  |
| O  | 6.63457900  | -0.57304600 | 3.21277600  | H               | -4.17679300 | 0.65715800  | 1.39112300  |
| O  | 3.17936300  | -2.23640300 | -0.44457800 | C               | -4.34006400 | 1.58106400  | -1.97742400 |
| C  | 5.14386300  | -3.47521900 | -0.78550000 | C               | -4.90173900 | 1.42569200  | -0.53854300 |
| H  | 4.54998700  | -4.39164000 | -0.71224100 | H               | -4.32422800 | 2.63264200  | -2.28580700 |
| H  | 5.14938600  | -3.15111900 | -1.83083600 | H               | -4.95967400 | 1.04156500  | -2.70296900 |

|              |             |             |             |                 |             |             |             |
|--------------|-------------|-------------|-------------|-----------------|-------------|-------------|-------------|
| H            | -2.47191700 | 1.08994300  | -3.02996600 | C               | 0.68040400  | -3.20481900 | 0.18742100  |
| H            | -5.17365000 | 2.39915000  | -0.11460100 | C               | -0.46089100 | -1.64735100 | -1.24952300 |
| H            | -5.80565500 | 0.80537700  | -0.53120500 | C               | -0.26952000 | -4.16935100 | -0.11207100 |
| C            | -1.08851900 | 2.82480800  | -1.40435700 | H               | 1.47851000  | -3.45651800 | 0.87982200  |
| C            | -0.94580400 | 4.01044600  | -0.66144900 | C               | -1.44053400 | -2.61195800 | -1.54000200 |
| C            | -0.30668900 | 2.68095400  | -2.56668200 | H               | -0.42615800 | -0.73535900 | -1.86578200 |
| C            | -0.05150000 | 5.00535600  | -1.05580900 | C               | -1.34927400 | -3.88017200 | -0.96662700 |
| H            | -1.55368800 | 4.15972700  | 0.22547600  | H               | -0.20876900 | -5.16567500 | 0.31594500  |
| C            | 0.58549700  | 3.67536500  | -2.96324000 | H               | -2.23858800 | -2.36186100 | -2.22923300 |
| H            | -0.38105900 | 1.76708800  | -3.14923000 | C               | -3.34052700 | 0.74395000  | 0.43668600  |
| C            | 0.71912900  | 4.84413800  | -2.20851400 | C               | -3.15408600 | 1.28286900  | -0.81515700 |
| H            | 0.03708900  | 5.91238000  | -0.46344500 | C               | -2.91419900 | 1.72100000  | 1.54400100  |
| H            | 1.18150400  | 3.53601800  | -3.86158800 | C               | -1.46122600 | 2.05094300  | 1.21121300  |
| H            | 1.41332600  | 5.62064500  | -2.51807300 | C               | -1.29107900 | 2.63970600  | -0.07638100 |
| C            | -3.91302700 | -1.87498400 | 0.31208800  | C               | -2.63463600 | 2.71288800  | -0.82369700 |
| C            | -4.02098500 | -2.06535300 | 1.70189300  | H               | -2.51547600 | 3.09405600  | -1.83976200 |
| C            | -4.29612400 | -2.93626300 | -0.52730200 | C               | -3.78062700 | 3.01282600  | 1.42087900  |
| C            | -4.47820900 | -3.27090900 | 2.22997300  | C               | -3.60763000 | 3.61350100  | -0.00028600 |
| H            | -3.71796100 | -1.26974800 | 2.37623000  | H               | -4.82979400 | 2.76693100  | 1.62154800  |
| C            | -4.74857000 | -4.14570100 | 0.00024800  | H               | -3.46455600 | 3.72637400  | 2.19055100  |
| H            | -4.25784600 | -2.80556100 | -1.60472700 | H               | -3.01341100 | 1.27897600  | 2.53743000  |
| C            | -4.84190100 | -4.32012400 | 1.38198100  | H               | -4.56970300 | 3.67494200  | -0.52158400 |
| H            | -4.54546500 | -3.39359700 | 3.30791700  | H               | -3.19983300 | 4.62970700  | 0.04599200  |
| H            | -5.04038800 | -4.94859400 | -0.67198900 | C               | -4.06506100 | -0.51404200 | 0.72742100  |
| H            | -5.19966800 | -5.25986400 | 1.79385500  | C               | -5.11579900 | -0.95009700 | -0.10021600 |
| H            | -2.74727500 | -1.24895400 | -2.21918300 | C               | -3.73800000 | -1.29907500 | 1.84820600  |
| H            | -2.22333700 | 2.18978800  | 1.14770700  | C               | -5.80271300 | -2.13310000 | 0.17313500  |
| O            | 2.67766500  | 2.73046700  | 3.81582300  | H               | -5.41248100 | -0.34065100 | -0.94928600 |
| C            | 2.64094100  | 2.43566300  | 5.20116400  | C               | -4.42235900 | -2.48225600 | 2.12047500  |
| H            | 3.02130000  | 1.42670300  | 5.41092300  | H               | -2.92199400 | -0.99236600 | 2.49636000  |
| H            | 3.28847400  | 3.17112900  | 5.68264000  | C               | -5.45779000 | -2.90657000 | 1.28431700  |
| H            | 1.62465500  | 2.52629700  | 5.60822100  | H               | -6.62088600 | -2.44140000 | -0.47316500 |
|              |             |             |             | H               | -4.14345900 | -3.07681800 | 2.98630800  |
|              |             |             |             | H               | -5.99554300 | -3.82549200 | 1.50121700  |
| <b>35-L4</b> |             |             |             | C               | -0.18296300 | 3.55625500  | -0.44954800 |
| C            | 5.55640700  | -1.14803600 | 1.67357500  | C               | 0.16141500  | 3.75556000  | -1.79943500 |
| C            | 6.47960500  | -2.06158700 | 1.34295300  | C               | 0.54172900  | 4.26553500  | 0.52363300  |
| C            | 7.09343100  | -2.09831200 | -0.00656400 | C               | 1.18960400  | 4.62247700  | -2.16059800 |
| C            | 6.58692700  | -1.10621500 | -0.98480500 | H               | -0.36843200 | 3.20417100  | -2.57118500 |
| C            | 5.66070600  | -0.19679100 | -0.65034400 | C               | 1.57516900  | 5.13218100  | 0.16386900  |
| C            | 5.09425700  | -0.04832200 | 0.74430100  | H               | 0.28245900  | 4.15168200  | 1.57188200  |
| H            | 5.10430000  | -1.13671400 | 2.66438700  | C               | 1.90391900  | 5.31618700  | -1.17940900 |
| H            | 6.81904200  | -2.82287800 | 2.04031100  | H               | 1.43854500  | 4.75370400  | -3.21057000 |
| H            | 7.00316800  | -1.16983300 | -1.98668200 | H               | 2.11698400  | 5.67099300  | 0.93710400  |
| H            | 5.28145000  | 0.51749900  | -1.37963200 | H               | 2.70538400  | 5.99403100  | -1.46070300 |
| O            | 7.95978200  | -2.91578800 | -0.30110400 | H               | -0.74896900 | 2.20937200  | 2.01657100  |
| O            | 3.66352900  | 0.03181400  | 0.70914300  | H               | -3.50357200 | 0.80619400  | -1.72632900 |
| C            | 5.53061700  | 1.31627100  | 1.32049500  | O               | -2.22322200 | -4.90545900 | -1.18340400 |
| H            | 5.15816000  | 2.11937200  | 0.67670500  | C               | -3.35213600 | -4.65528600 | -2.00540100 |
| H            | 5.09916300  | 1.44773900  | 2.31792700  | H               | -3.05486900 | -4.39271100 | -3.03003900 |
| H            | 6.62034500  | 1.38132300  | 1.38708600  | H               | -3.91938800 | -5.58793500 | -2.02616700 |
| C            | 2.98352200  | -1.12604700 | 0.23380400  | H               | -3.97947100 | -3.85545400 | -1.59159300 |
| H            | 3.44322200  | -1.48272100 | -0.70306600 |                 |             |             |             |
| H            | 3.09104800  | -1.94723000 | 0.96123300  | <b>36-ts-L4</b> |             |             |             |
| C            | 1.52493900  | -0.79888800 | 0.00346000  | C               | 4.80824100  | 2.32065600  | -0.29820900 |
| C            | 0.97348200  | 0.43154000  | 0.09564600  | C               | 5.73195100  | 1.61234800  | 0.36644800  |
| H            | 1.59399300  | 1.28652500  | 0.36251300  | C               | 6.31784100  | 0.37424300  | -0.19805500 |
| Rh           | -1.00267300 | 0.51152900  | -0.14208800 | C               | 5.85264100  | -0.01614900 | -1.55015200 |
| C            | 0.60810600  | -1.90630300 | -0.36030000 |                 |             |             |             |

|    |             |             |             |
|----|-------------|-------------|-------------|
| C  | 4.93081200  | 0.69666300  | -2.21243900 |
| C  | 4.30980300  | 1.96901800  | -1.68195700 |
| H  | 4.36083300  | 3.21126100  | 0.14068700  |
| H  | 6.07664100  | 1.89433400  | 1.35761600  |
| H  | 6.28932500  | -0.92306100 | -1.96007400 |
| H  | 4.57879000  | 0.38416800  | -3.19466200 |
| O  | 7.12847300  | -0.30400500 | 0.42751900  |
| O  | 2.87310700  | 1.87462600  | -1.68934400 |
| C  | 4.61521200  | 3.13104900  | -2.64721000 |
| H  | 4.22008100  | 2.89690200  | -3.64074000 |
| H  | 4.12599300  | 4.04236700  | -2.28921300 |
| H  | 5.69279700  | 3.30558200  | -2.72010500 |
| C  | 2.32799200  | 0.82544300  | -0.87522900 |
| H  | 2.60654900  | -0.15736000 | -1.27968700 |
| H  | 2.74721700  | 0.87162600  | 0.14026500  |
| C  | 0.86084300  | 0.94249800  | -0.81179400 |
| C  | -0.16685400 | 1.60977900  | -1.18223100 |
| H  | -0.54548000 | 2.39545000  | -1.81202100 |
| Rh | -0.68014100 | -0.24574100 | -0.14987100 |
| C  | -1.84429400 | 1.51267300  | 0.02578200  |
| C  | -3.07334500 | 1.72314300  | -0.63355800 |
| C  | -1.59057800 | 2.27015000  | 1.17897500  |
| C  | -4.01669900 | 2.60910000  | -0.13110400 |
| H  | -3.29906300 | 1.18020900  | -1.54655000 |
| C  | -2.54190100 | 3.15190500  | 1.70952200  |
| H  | -0.62961400 | 2.18027100  | 1.67787200  |
| C  | -3.76298900 | 3.32449600  | 1.05152000  |
| H  | -4.96724700 | 2.76168100  | -0.63416900 |
| H  | -2.30787000 | 3.70462300  | 2.61298500  |
| C  | -2.29142900 | -1.89345900 | -0.23681800 |
| C  | -2.01736200 | -1.53580800 | 1.08452000  |
| C  | -1.30927100 | -2.96262800 | -0.73795500 |
| C  | 0.06398400  | -2.35729500 | -0.49836400 |
| C  | 0.33210200  | -2.04272100 | 0.83074900  |
| C  | -0.88525900 | -2.33081800 | 1.72496000  |
| H  | -0.71117700 | -2.02573700 | 2.75824900  |
| C  | -1.47148800 | -4.23437100 | 0.15382600  |
| C  | -1.20818200 | -3.85440700 | 1.63614800  |
| H  | -2.48177600 | -4.63796700 | 0.02149800  |
| H  | -0.76940500 | -5.00443900 | -0.18604300 |
| H  | -1.46669100 | -3.20336200 | -1.79071900 |
| H  | -2.08337200 | -4.06971400 | 2.25978200  |
| H  | -0.36859100 | -4.42606800 | 2.04851000  |
| C  | -3.55893800 | -1.62926600 | -0.95511600 |
| C  | -4.76249800 | -1.42517500 | -0.25704700 |
| C  | -3.60133400 | -1.59365300 | -2.36196500 |
| C  | -5.95723100 | -1.18485500 | -0.93533100 |
| H  | -4.76338400 | -1.47139400 | 0.82766600  |
| C  | -4.79492800 | -1.35653900 | -3.04094400 |
| H  | -2.68321000 | -1.72583000 | -2.92730200 |
| C  | -5.98065900 | -1.14973900 | -2.33051400 |
| H  | -6.87340700 | -1.03258900 | -0.37064800 |
| H  | -4.79863600 | -1.32814700 | -4.12759200 |
| H  | -6.91207600 | -0.96696600 | -2.85952000 |
| C  | 1.68477300  | -1.82105700 | 1.40124600  |
| C  | 1.86941700  | -1.03233800 | 2.55175900  |
| C  | 2.82263600  | -2.40081000 | 0.81155700  |
| C  | 3.14312200  | -0.80924900 | 3.07298500  |

|   |             |             |             |
|---|-------------|-------------|-------------|
| H | 1.00921800  | -0.56579400 | 3.02373300  |
| C | 4.09852300  | -2.17093600 | 1.32743000  |
| H | 2.70377400  | -3.04632200 | -0.05409500 |
| C | 4.26637900  | -1.36931900 | 2.45814000  |
| H | 3.25938700  | -0.18763800 | 3.95719500  |
| H | 4.96608100  | -2.61620300 | 0.84851200  |
| H | 5.26277200  | -1.18341800 | 2.84811900  |
| H | 0.83790100  | -2.42123500 | -1.25730700 |
| H | -2.70593100 | -0.96406500 | 1.69780800  |
| O | -4.76026400 | 4.16710500  | 1.46079400  |
| C | -4.55595200 | 4.91708500  | 2.64449500  |
| H | -5.46338000 | 5.50736800  | 2.78793900  |
| H | -4.40640000 | 4.26614200  | 3.51689000  |
| H | -3.69536100 | 5.59393200  | 2.55315100  |

**37-L4**

|    |             |             |             |
|----|-------------|-------------|-------------|
| C  | -4.83006500 | 2.19950300  | -0.55888900 |
| C  | -5.82093000 | 1.29706600  | -0.55479700 |
| C  | -6.21870600 | 0.58397400  | 0.68066500  |
| C  | -5.46117900 | 0.92221800  | 1.90872200  |
| C  | -4.47242300 | 1.82709500  | 1.90012900  |
| C  | -4.06830300 | 2.62037800  | 0.67762900  |
| H  | -4.52529900 | 2.69641000  | -1.47869200 |
| H  | -6.36231800 | 1.02562600  | -1.45681400 |
| H  | -5.74569500 | 0.38106100  | 2.80741800  |
| H  | -3.90754100 | 2.05199500  | 2.80383600  |
| O  | -7.11232500 | -0.25934700 | 0.68451100  |
| O  | -2.65466900 | 2.54114700  | 0.45928800  |
| C  | -4.32700600 | 4.11906500  | 0.94275100  |
| H  | -3.74824800 | 4.44159700  | 1.81422500  |
| H  | -3.99981400 | 4.70436800  | 0.07750600  |
| H  | -5.38900400 | 4.30788600  | 1.12506100  |
| C  | -2.12662200 | 1.23070000  | 0.19075100  |
| H  | -2.29076000 | 0.58200100  | 1.06406300  |
| H  | -2.67736900 | 0.76822900  | -0.64115500 |
| C  | -0.66823900 | 1.29707600  | -0.13930300 |
| C  | 0.00541200  | 2.46717800  | -0.21467700 |
| H  | -0.45270600 | 3.42855300  | 0.01898400  |
| Rh | 0.62429000  | -0.25942500 | -0.27420300 |
| C  | 1.43562100  | 2.44048400  | -0.56617900 |
| C  | 2.38084600  | 3.30546200  | 0.01323800  |
| C  | 1.92336300  | 1.48164100  | -1.49093900 |
| C  | 3.73964300  | 3.20707500  | -0.27641600 |
| H  | 2.04388900  | 4.05988800  | 0.72004200  |
| C  | 3.28732100  | 1.36713800  | -1.77604900 |
| H  | 1.20310900  | 0.93299400  | -2.11276600 |
| C  | 4.20594800  | 2.22245100  | -1.16472000 |
| H  | 4.43158200  | 3.89452500  | 0.19788000  |
| H  | 3.65113600  | 0.63612500  | -2.49123900 |
| C  | 2.13059100  | -1.90732100 | 0.52091100  |
| C  | 1.76385400  | -2.24952100 | -0.76428300 |
| C  | 1.07622600  | -2.34679200 | 1.54891100  |
| C  | -0.20046200 | -1.66329000 | 1.06575900  |
| C  | -0.58508400 | -2.04626100 | -0.25221400 |
| C  | 0.44922400  | -3.00535700 | -0.86926800 |
| H  | 0.20179700  | -3.25114600 | -1.90405500 |
| C  | 0.90850100  | -3.89472400 | 1.46198800  |
| C  | 0.51898600  | -4.29011100 | 0.01185200  |

|              |             |             |             |    |             |             |             |
|--------------|-------------|-------------|-------------|----|-------------|-------------|-------------|
| H            | 1.84411400  | -4.37789900 | 1.76625600  | Rh | 0.06056900  | -0.32117500 | -0.43273500 |
| H            | 0.13795600  | -4.20875600 | 2.17557100  | C  | 0.18875300  | -2.10597800 | 2.39028300  |
| H            | 1.34256600  | -2.04124300 | 2.56238200  | C  | 0.18889700  | -3.18667500 | 3.28906900  |
| H            | 1.25304900  | -4.98071500 | -0.41860600 | C  | 1.44432900  | -1.71417200 | 1.87825700  |
| H            | -0.45355000 | -4.79475800 | -0.01365700 | C  | 1.35625200  | -3.86936800 | 3.63499000  |
| C            | 3.45990900  | -1.39349200 | 0.92489500  | H  | -0.75547000 | -3.51162000 | 3.72008100  |
| C            | 4.61554900  | -1.72396000 | 0.19451000  | C  | 2.61688700  | -2.38615600 | 2.20049300  |
| C            | 3.60593700  | -0.57106400 | 2.05674900  | H  | 1.51648300  | -0.82304400 | 1.24498100  |
| C            | 5.86695400  | -1.24043600 | 0.57216700  | C  | 2.58189400  | -3.47567000 | 3.08293200  |
| H            | 4.53278600  | -2.38306000 | -0.66477800 | H  | 1.29802400  | -4.70056300 | 4.32910400  |
| C            | 4.85749900  | -0.08894000 | 2.43623700  | H  | 3.57343300  | -2.07009800 | 1.79538000  |
| H            | 2.72760300  | -0.28545900 | 2.62815300  | C  | 2.20734200  | -1.18210200 | -1.99095100 |
| C            | 5.99467900  | -0.42111600 | 1.69604500  | C  | 1.39570400  | -0.49429800 | -2.83413300 |
| H            | 6.74535000  | -1.51372600 | -0.00652000 | C  | 1.64692600  | -2.57304700 | -1.69111500 |
| H            | 4.94363600  | 0.54941700  | 3.31173200  | C  | 0.20713200  | -2.39764900 | -1.20463300 |
| H            | 6.97196000  | -0.05343600 | 1.99770900  | C  | -0.62673700 | -1.73999800 | -2.11461100 |
| C            | -1.98148300 | -2.06706500 | -0.76107300 | C  | 0.17962900  | -1.25185600 | -3.32644700 |
| C            | -2.24575100 | -1.92622700 | -2.13577000 | H  | -0.41779800 | -0.65064700 | -4.01291000 |
| C            | -3.07099600 | -2.26674800 | 0.10365800  | C  | 1.57961800  | -3.35203100 | -3.04864300 |
| C            | -3.54974700 | -1.96833900 | -2.62408700 | C  | 0.70309400  | -2.54769300 | -4.04381500 |
| H            | -1.41850900 | -1.75627700 | -2.81995000 | H  | 2.59222600  | -3.49693000 | -3.44179800 |
| C            | -4.37921100 | -2.30580600 | -0.38272400 | H  | 1.15680900  | -4.34590700 | -2.86489500 |
| H            | -2.89021500 | -2.40390400 | 1.16598100  | H  | 2.23752200  | -3.10971500 | -0.94810500 |
| C            | -4.62370000 | -2.15517800 | -1.74846200 | H  | 1.27653500  | -2.25444700 | -4.92958200 |
| H            | -3.72951200 | -1.84833200 | -3.68947000 | H  | -0.15285700 | -3.13785900 | -4.38967600 |
| H            | -5.20954600 | -2.44547900 | 0.30333400  | C  | 3.53352500  | -0.72837400 | -1.51750400 |
| H            | -5.64260700 | -2.18238600 | -2.12435700 | C  | 3.86232100  | 0.64092300  | -1.47506800 |
| H            | -0.92160400 | -1.29485400 | 1.79119700  | C  | 4.52299300  | -1.65443300 | -1.14163900 |
| H            | 2.42579800  | -2.14905000 | -1.61888400 | C  | 5.13124700  | 1.06692000  | -1.08973300 |
| O            | 5.51641500  | 2.04412800  | -1.51042600 | H  | 3.10653200  | 1.37895300  | -1.72817100 |
| C            | 6.49208900  | 2.84866100  | -0.87225200 | C  | 5.79429800  | -1.22902500 | -0.75212400 |
| H            | 6.48535300  | 2.70144900  | 0.21611500  | H  | 4.31098600  | -2.71850600 | -1.17187900 |
| H            | 7.45542500  | 2.52726600  | -1.27343600 | C  | 6.10428400  | 0.13055400  | -0.72591400 |
| H            | 6.34930000  | 3.91523900  | -1.09371900 | H  | 5.36002500  | 2.12873200  | -1.06996800 |
|              |             |             |             | H  | 6.54258800  | -1.96603200 | -0.47264800 |
|              |             |             |             | H  | 7.09325700  | 0.46192500  | -0.42159700 |
|              |             |             |             | C  | -2.09362200 | -1.93360700 | -2.24176300 |
|              |             |             |             | C  | -2.88236700 | -1.04256700 | -2.99458200 |
|              |             |             |             | C  | -2.73770200 | -3.03698400 | -1.65171100 |
|              |             |             |             | C  | -4.25287500 | -1.24366300 | -3.15065200 |
|              |             |             |             | H  | -2.42235600 | -0.17187800 | -3.45231100 |
|              |             |             |             | C  | -4.10899500 | -3.23709800 | -1.80276200 |
|              |             |             |             | H  | -2.15588700 | -3.75472800 | -1.08304700 |
|              |             |             |             | C  | -4.87476700 | -2.34451800 | -2.55661600 |
|              |             |             |             | H  | -4.83548200 | -0.53847900 | -3.73749700 |
|              |             |             |             | H  | -4.57715400 | -4.10282800 | -1.34155900 |
|              |             |             |             | H  | -5.94099700 | -2.50929000 | -2.68722200 |
|              |             |             |             | H  | -0.17499600 | -3.07264000 | -0.44558100 |
|              |             |             |             | H  | 1.64536600  | 0.47719300  | -3.24886700 |
|              |             |             |             | C  | 2.51201700  | 4.90860800  | 1.64540200  |
|              |             |             |             | C  | 3.75145200  | 4.86096400  | 1.13697700  |
|              |             |             |             | C  | 3.98645500  | 4.69813400  | -0.31610500 |
|              |             |             |             | C  | 2.78221200  | 4.58124600  | -1.17014000 |
|              |             |             |             | C  | 1.54362100  | 4.62250600  | -0.65716600 |
|              |             |             |             | C  | 1.25468200  | 4.84558700  | 0.80854700  |
|              |             |             |             | H  | 2.34603700  | 5.00488400  | 2.71706200  |
|              |             |             |             | H  | 4.63895500  | 4.92125400  | 1.76105400  |
|              |             |             |             | H  | 2.96387000  | 4.44773700  | -2.23333600 |
| <b>38-L4</b> |             |             |             |    |             |             |             |
| C            | -4.62744700 | 1.66358500  | 2.21398200  |    |             |             |             |
| C            | -5.16302400 | 2.72226000  | 1.58993200  |    |             |             |             |
| C            | -5.98836700 | 2.57067100  | 0.36794100  |    |             |             |             |
| C            | -6.13900800 | 1.19185900  | -0.15385900 |    |             |             |             |
| C            | -5.60239400 | 0.13575500  | 0.47346100  |    |             |             |             |
| C            | -4.85600800 | 0.23070700  | 1.78487800  |    |             |             |             |
| H            | -4.00857300 | 1.78594800  | 3.10167800  |    |             |             |             |
| H            | -5.01045500 | 3.74011700  | 1.93887800  |    |             |             |             |
| H            | -6.69660400 | 1.09275200  | -1.08146300 |    |             |             |             |
| H            | -5.69574300 | -0.86895800 | 0.06505500  |    |             |             |             |
| O            | -6.50003800 | 3.53571400  | -0.19257800 |    |             |             |             |
| O            | -3.62084500 | -0.49172400 | 1.73144500  |    |             |             |             |
| C            | -5.67002900 | -0.49515400 | 2.87894400  |    |             |             |             |
| H            | -5.81371800 | -1.54198600 | 2.59308000  |    |             |             |             |
| H            | -5.11642100 | -0.46943300 | 3.82304100  |    |             |             |             |
| H            | -6.64592100 | -0.02185100 | 3.02008600  |    |             |             |             |
| C            | -2.67884900 | -0.04238600 | 0.74464100  |    |             |             |             |
| H            | -3.05781000 | -0.27425100 | -0.25899600 |    |             |             |             |
| H            | -2.57402200 | 1.05040500  | 0.80159400  |    |             |             |             |
| C            | -1.32955400 | -0.68106300 | 0.94901200  |    |             |             |             |
| C            | -1.07049300 | -1.44594200 | 2.03311000  |    |             |             |             |
| H            | -1.89676700 | -1.61932700 | 2.72262900  |    |             |             |             |

|                 |             |             |             |   |             |             |             |
|-----------------|-------------|-------------|-------------|---|-------------|-------------|-------------|
| H               | 0.66857600  | 4.51612800  | -1.29408500 | C | 0.16827900  | -2.00474300 | -2.58891400 |
| O               | 5.12098600  | 4.63556300  | -0.78482400 | H | 0.77108700  | -2.87344200 | -2.32151500 |
| O               | 0.36700600  | 3.84101900  | 1.33538100  | C | -1.18911200 | -0.86291600 | -4.40247100 |
| C               | 0.46519200  | 6.16022100  | 0.97577400  | C | -0.32266200 | -2.10608600 | -4.06897400 |
| H               | -0.46725700 | 6.10379100  | 0.40555400  | H | -2.19650700 | -1.15539700 | -4.72043700 |
| H               | 0.21442300  | 6.30446600  | 2.03137300  | H | -0.74765800 | -0.28114000 | -5.21965600 |
| H               | 1.05170700  | 7.01446400  | 0.62533400  | H | -1.89549000 | 0.93152100  | -3.33965800 |
| C               | 0.79034700  | 2.47515500  | 1.22541400  | H | -0.89494100 | -3.03212100 | -4.19350900 |
| H               | 1.88528400  | 2.40601200  | 1.18729200  | H | 0.54828000  | -2.17238100 | -4.73073700 |
| H               | 0.46767800  | 1.98675300  | 2.15207100  | C | -3.31010900 | -0.70147700 | -1.61714500 |
| C               | 0.18166600  | 1.75997300  | 0.08189900  | C | -4.05198500 | -1.85430300 | -1.29610800 |
| C               | -0.57372400 | 1.62901400  | -0.91935600 | C | -3.98369500 | 0.53386100  | -1.62195200 |
| H               | -1.25868900 | 1.98088800  | -1.67065200 | C | -5.40485300 | -1.76868200 | -0.96649200 |
| O               | 3.78590400  | -4.07029200 | 3.34714000  | H | -3.57371900 | -2.82889800 | -1.32339200 |
| C               | 3.80850500  | -5.15358600 | 4.25910800  | C | -5.33657800 | 0.61806600  | -1.29598800 |
| H               | 4.85219000  | -5.46678600 | 4.32950300  | H | -3.44111700 | 1.44139000  | -1.86846800 |
| H               | 3.45329600  | -4.85374200 | 5.25455000  | C | -6.05413700 | -0.53285100 | -0.96192200 |
| H               | 3.20158000  | -5.99748200 | 3.90302700  | H | -5.95483400 | -2.67513100 | -0.72740300 |
| <b>39-ts-L4</b> |             |             |             | H | -5.83149400 | 1.58580400  | -1.30424500 |
| C               | 4.43394100  | -0.59583700 | 2.31982900  | H | -7.10956900 | -0.46780600 | -0.71190700 |
| C               | 5.41607900  | -1.28183500 | 1.71936200  | C | 2.41921700  | -0.66475600 | -2.47419700 |
| C               | 6.43121300  | -0.60992500 | 0.87428100  | C | 3.18416900  | -1.70277700 | -1.90875800 |
| C               | 6.30838500  | 0.86034700  | 0.74383300  | C | 3.11068900  | 0.38040700  | -3.11641000 |
| C               | 5.32438600  | 1.54168000  | 1.34670800  | C | 4.57680400  | -1.68699100 | -1.96424500 |
| C               | 4.29281400  | 0.90752300  | 2.25132600  | H | 2.68468500  | -2.52043300 | -1.39722000 |
| H               | 3.67984700  | -1.10488500 | 2.91874500  | C | 4.50390200  | 0.39940700  | -3.16872900 |
| H               | 5.50553900  | -2.36164800 | 1.80385700  | H | 2.54923500  | 1.17571000  | -3.59688400 |
| H               | 7.04734000  | 1.34615300  | 0.11253000  | C | 5.24600900  | -0.63215400 | -2.58942500 |
| H               | 5.22861700  | 2.61919300  | 1.22080500  | H | 5.14747800  | -2.48952700 | -1.50582500 |
| O               | 7.31161600  | -1.24156000 | 0.29574300  | H | 5.00995200  | 1.21841000  | -3.67376100 |
| O               | 2.96276300  | 1.28173100  | 1.85245600  | H | 6.33154100  | -0.61918600 | -2.61695600 |
| C               | 4.43765200  | 1.49324300  | 3.67197000  | H | 0.48801800  | 1.41570900  | -2.82058800 |
| H               | 4.29351000  | 2.57767500  | 3.63768400  | H | -1.34686600 | -2.68889800 | -1.04562000 |
| H               | 3.67079500  | 1.06603200  | 4.32618600  | C | -3.50420100 | -3.27017400 | 2.88544700  |
| H               | 5.42593800  | 1.27356600  | 4.08629400  | C | -3.56403700 | -4.17722200 | 1.90049400  |
| C               | 2.55916400  | 0.87550100  | 0.52219800  | C | -2.35090900 | -4.59681000 | 1.16064100  |
| H               | 3.22527300  | 1.33713700  | -0.21866000 | C | -1.06370200 | -4.04594400 | 1.63989300  |
| H               | 2.65907000  | -0.20892500 | 0.42377400  | C | -1.00809100 | -3.12950800 | 2.61728600  |
| C               | 1.12555700  | 1.32405900  | 0.30420300  | C | -2.22302200 | -2.61853800 | 3.35548700  |
| C               | 0.90209800  | 2.66541200  | 0.38093100  | H | -4.40581800 | -2.93164200 | 3.39313100  |
| H               | 1.79891500  | 3.27082400  | 0.54521300  | H | -4.50161800 | -4.61735400 | 1.57139900  |
| Rh              | -0.22280200 | -0.07061700 | -0.51774600 | H | -0.17351300 | -4.39204800 | 1.12157200  |
| C               | -0.31387000 | 3.47609500  | 0.36413300  | H | -0.05878300 | -2.69598100 | 2.92249700  |
| C               | -0.20653600 | 4.83883100  | 0.70100700  | O | -2.41541200 | -5.33162100 | 0.17713900  |
| C               | -1.60786800 | 3.00086300  | 0.05500200  | O | -2.34164800 | -1.18537400 | 3.23537600  |
| C               | -1.31165400 | 5.68775600  | 0.75286000  | C | -2.04728600 | -2.85459500 | 4.86671200  |
| H               | 0.77340300  | 5.24486000  | 0.94241400  | H | -1.14378100 | -2.34531400 | 5.21626600  |
| C               | -2.71869200 | 3.82895400  | 0.11252800  | H | -2.90519700 | -2.44009900 | 5.40539100  |
| H               | -1.72885400 | 1.96385300  | -0.24024500 | H | -1.96646600 | -3.92318900 | 5.08815700  |
| C               | -2.58408000 | 5.18147200  | 0.46272600  | C | -2.42200600 | -0.66260300 | 1.89847700  |
| H               | -1.17047800 | 6.72868300  | 1.02154100  | H | -2.90438800 | -1.38053700 | 1.22824000  |
| H               | -3.71019500 | 3.45175300  | -0.12054700 | H | -3.08736800 | 0.20638200  | 1.96672200  |
| C               | -1.87713600 | -0.80075900 | -1.99420100 | C | -1.11911100 | -0.21145400 | 1.35017200  |
| C               | -1.04048700 | -1.86315100 | -1.67949100 | C | 0.05603300  | 0.20019000  | 1.63661200  |
| C               | -1.29404300 | 0.04431900  | -3.13582000 | H | 0.81737500  | 0.32878700  | 2.38777200  |
| C               | 0.10740700  | 0.41166800  | -2.66535300 | O | -3.73854900 | 5.91182900  | 0.48020800  |
| C               | 0.93806300  | -0.68791900 | -2.43088400 | C | -3.65602100 | 7.28491500  | 0.82092600  |
|                 |             |             |             | H | -4.67711800 | 7.66860500  | 0.77397500  |

|   |             |            |            |
|---|-------------|------------|------------|
| H | -3.26258200 | 7.42714500 | 1.83654000 |
| H | -3.02748700 | 7.84117000 | 0.11233900 |

**40-L4**

|    |             |             |             |
|----|-------------|-------------|-------------|
| C  | 5.30949600  | -0.01363400 | -2.29703800 |
| C  | 5.99566800  | 1.09931400  | -2.59180700 |
| C  | 6.41474900  | 2.05777300  | -1.54036300 |
| C  | 5.98916700  | 1.74011000  | -0.15616600 |
| C  | 5.30218000  | 0.62655500  | 0.13501700  |
| C  | 4.94268800  | -0.42514500 | -0.88865400 |
| H  | 4.99355500  | -0.70514200 | -3.07674800 |
| H  | 6.27296900  | 1.35809300  | -3.61024900 |
| H  | 6.26171600  | 2.46837200  | 0.60317900  |
| H  | 4.98203300  | 0.40645300  | 1.15164600  |
| O  | 7.06321200  | 3.06504100  | -1.80439800 |
| O  | 3.54576500  | -0.76214200 | -0.81662400 |
| C  | 5.66298800  | -1.74350400 | -0.53807800 |
| H  | 5.36499300  | -2.06528800 | 0.46466700  |
| H  | 5.37238600  | -2.52033300 | -1.25270600 |
| H  | 6.74856500  | -1.61380600 | -0.57071200 |
| C  | 2.63290500  | 0.31042800  | -1.01100800 |
| H  | 2.63590500  | 0.98188900  | -0.14055300 |
| H  | 2.92993400  | 0.92001300  | -1.88109200 |
| C  | 1.23056500  | -0.19498400 | -1.28480500 |
| C  | 0.91257700  | -1.52482900 | -1.07088400 |
| H  | 1.69908200  | -2.09415500 | -0.58166700 |
| Rh | -0.52897300 | -0.40572400 | 0.48460900  |
| C  | -0.12222100 | -2.39768100 | -1.67627100 |
| C  | -0.08729700 | -3.76141800 | -1.33486500 |
| C  | -1.07509600 | -2.00832700 | -2.64453800 |
| C  | -0.95805100 | -4.69873000 | -1.89404700 |
| H  | 0.65581900  | -4.10457600 | -0.61817300 |
| C  | -1.93832600 | -2.92967900 | -3.21685000 |
| H  | -1.13708600 | -0.96988900 | -2.94443200 |
| C  | -1.89740600 | -4.28349500 | -2.84333400 |
| H  | -0.88377500 | -5.73801400 | -1.59413900 |
| H  | -2.66307600 | -2.62279700 | -3.96504000 |
| C  | -2.41852000 | -0.43747200 | 1.57438400  |
| C  | -1.53512200 | 0.49732600  | 2.15836000  |
| C  | -2.23177500 | -1.83298200 | 2.19434300  |
| C  | -0.74889600 | -2.12289000 | 2.02241300  |
| C  | 0.09506400  | -1.21546500 | 2.63517800  |
| C  | -0.69689900 | -0.07573100 | 3.29537100  |
| H  | -0.04708400 | 0.68120900  | 3.73622200  |
| C  | -2.56576600 | -1.74368400 | 3.71534800  |
| C  | -1.63922400 | -0.68831200 | 4.37755700  |
| H  | -3.62160400 | -1.47518300 | 3.83544600  |
| H  | -2.42939500 | -2.73058000 | 4.17209900  |
| H  | -2.85031200 | -2.58065200 | 1.69409800  |
| H  | -2.22410000 | 0.11745000  | 4.83575700  |
| H  | -1.03215400 | -1.13731500 | 5.17199700  |
| C  | -3.69782500 | -0.10044300 | 0.89785800  |
| C  | -4.45186200 | 1.01744000  | 1.29295800  |
| C  | -4.20789700 | -0.91730000 | -0.12778600 |
| C  | -5.66690500 | 1.31884300  | 0.67472200  |
| H  | -4.08936800 | 1.64697900  | 2.10073300  |
| C  | -5.42113500 | -0.61766200 | -0.74383600 |
| H  | -3.62937600 | -1.77281300 | -0.46507500 |

|   |             |             |             |
|---|-------------|-------------|-------------|
| C | -6.15627300 | 0.50357000  | -0.34635900 |
| H | -6.23354000 | 2.18788100  | 0.99903700  |
| H | -5.79129500 | -1.25719900 | -1.54094700 |
| H | -7.10304400 | 0.73569300  | -0.82666500 |
| C | 1.53828300  | -1.42197300 | 2.89884300  |
| C | 2.38577700  | -0.34173000 | 3.20920500  |
| C | 2.10058800  | -2.71299000 | 2.89718100  |
| C | 3.73198700  | -0.54401600 | 3.51190000  |
| H | 1.99145300  | 0.66967700  | 3.20753500  |
| C | 3.44880600  | -2.91528900 | 3.18679900  |
| H | 1.46578000  | -3.57110600 | 2.69753600  |
| C | 4.27325500  | -1.83203800 | 3.50148000  |
| H | 4.35764600  | 0.30800100  | 3.76681400  |
| H | 3.85141400  | -3.92494800 | 3.18851600  |
| H | 5.31907400  | -1.99111200 | 3.74991200  |
| H | -0.41696500 | -3.07104600 | 1.61232900  |
| H | -1.69508800 | 1.56990600  | 2.08771700  |
| C | -2.73672100 | 4.78856500  | -1.28165500 |
| C | -2.84808900 | 5.38823000  | -0.08787600 |
| C | -1.69333900 | 5.50871500  | 0.83342600  |
| C | -0.42283500 | 4.90043700  | 0.37375800  |
| C | -0.31653800 | 4.29647500  | -0.81895800 |
| C | -1.44457800 | 4.21700500  | -1.82205800 |
| H | -3.59502300 | 4.68756000  | -1.94390100 |
| H | -3.78713500 | 5.80407700  | 0.26783300  |
| H | 0.41306300  | 4.96549800  | 1.06539700  |
| H | 0.61755300  | 3.83622000  | -1.13224000 |
| O | -1.78982000 | 6.06417400  | 1.92401300  |
| O | -1.65438700 | 2.87055300  | -2.27788500 |
| C | -1.04465300 | 4.98900300  | -3.09647500 |
| H | -0.12847900 | 4.55972800  | -3.51447400 |
| H | -1.83920100 | 4.89667400  | -3.84377100 |
| H | -0.87773600 | 6.04759200  | -2.87704100 |
| C | -1.94569500 | 1.88545500  | -1.26558400 |
| H | -2.24652300 | 2.37720400  | -0.33347900 |
| H | -2.82764400 | 1.33381800  | -1.61771300 |
| C | -0.82839300 | 0.91958000  | -1.02358700 |
| C | 0.29145500  | 0.83913300  | -1.77191200 |
| H | 0.57225700  | 1.50826800  | -2.58947700 |
| O | -2.79921400 | -5.10065600 | -3.46208900 |
| C | -2.79930300 | -6.47643900 | -3.12146900 |
| H | -3.02038500 | -6.62961100 | -2.05638300 |
| H | -3.58712900 | -6.93507700 | -3.72207200 |
| H | -1.83870100 | -6.95247400 | -3.36029200 |

**41-L4**

|   |             |            |             |
|---|-------------|------------|-------------|
| C | -2.63800400 | 2.94233200 | -1.10460900 |
| C | -3.36350700 | 2.41196100 | -0.10948100 |
| C | -2.72955700 | 1.94815100 | 1.14783900  |
| C | -1.24928300 | 1.85071800 | 1.13935700  |
| C | -0.49539100 | 2.43370100 | 0.12419800  |
| C | -1.15004100 | 3.20685100 | -1.01638400 |
| H | -3.10842300 | 3.29258500 | -2.02217100 |
| H | -4.44387400 | 2.31721500 | -0.16202900 |
| H | -0.79970400 | 1.63965900 | 2.10726600  |
| H | 0.53735100  | 2.70062700 | 0.32198000  |
| O | -3.38585100 | 1.68684100 | 2.15180300  |
| O | -0.52097200 | 3.00424100 | -2.28505100 |

|    |             |             |             |                 |             |             |             |
|----|-------------|-------------|-------------|-----------------|-------------|-------------|-------------|
| C  | -0.94684300 | 4.71754100  | -0.74655000 | H               | -7.53499400 | -0.33877400 | 1.22080300  |
| H  | 0.12486200  | 4.93749600  | -0.71012200 | O               | 6.17703400  | 1.10235300  | 2.22094000  |
| H  | -1.38915800 | 5.29776700  | -1.56266300 | C               | 5.93148000  | 0.92679000  | 3.60417600  |
| H  | -1.41342800 | 5.01567800  | 0.19690500  | H               | 5.47531000  | -0.05039800 | 3.81557400  |
| C  | -0.19176600 | 1.64552800  | -2.63122600 | H               | 6.90647000  | 0.98026100  | 4.09299700  |
| H  | -1.11311200 | 1.07675900  | -2.82473700 | H               | 5.28221300  | 1.71716600  | 4.00495800  |
| H  | 0.35897100  | 1.74467000  | -3.57554800 |                 |             |             |             |
| C  | 0.66022400  | 1.02439700  | -1.54780500 | <b>42-ts-L4</b> |             |             |             |
| C  | 1.99389200  | 1.22963700  | -1.60152700 | C               | 2.32717600  | -3.00550700 | -1.52035100 |
| H  | 2.38008500  | 1.63709700  | -2.54262800 | C               | 3.06421900  | -2.59668200 | -0.48017800 |
| C  | 3.02800600  | 1.11738200  | -0.56594300 | C               | 2.43246800  | -2.18835800 | 0.80045800  |
| C  | 4.37890500  | 1.31445100  | -0.92532700 | C               | 0.98575100  | -1.90375000 | 0.75540300  |
| C  | 2.76145300  | 0.91054900  | 0.79827900  | C               | 0.16911100  | -2.33871200 | -0.34935400 |
| C  | 5.39977000  | 1.29789900  | 0.01324400  | C               | 0.81917800  | -3.14212600 | -1.49480000 |
| H  | 4.62493000  | 1.48740800  | -1.97072500 | H               | 2.79059300  | -3.33218500 | -2.45023000 |
| C  | 3.77504100  | 0.90068700  | 1.75851700  | H               | 4.15010200  | -2.58848300 | -0.50375600 |
| H  | 1.73507400  | 0.73971600  | 1.11377000  | H               | 0.52261100  | -1.87030600 | 1.74149000  |
| C  | 5.10597200  | 1.09283500  | 1.36926500  | H               | -0.81163600 | -2.70802400 | -0.06059800 |
| H  | 6.43523600  | 1.44981800  | -0.27637400 | O               | 3.08559800  | -2.11868800 | 1.83995700  |
| H  | 3.51589400  | 0.74309600  | 2.80009200  | O               | 0.28827700  | -2.75289300 | -2.76947600 |
| C  | -0.60580000 | -1.70093900 | -1.34412700 | C               | 0.44987500  | -4.62874000 | -1.33898900 |
| C  | 0.40912800  | -1.93346600 | -0.40068300 | H               | -0.63808200 | -4.74391900 | -1.38614600 |
| C  | -1.96831500 | -2.24953100 | -0.94961400 | H               | 0.89296700  | -5.20833700 | -2.15540600 |
| C  | -2.35446700 | -1.51699600 | 0.33399500  | H               | 0.81710500  | -5.02502500 | -0.38736800 |
| C  | -1.34343500 | -1.58795900 | 1.27044800  | C               | 0.05616800  | -1.34091100 | -2.82096600 |
| C  | -0.19087100 | -2.50703200 | 0.88875200  | H               | 1.00772500  | -0.80401000 | -2.94777700 |
| H  | -2.70282400 | -2.11206400 | -1.74370100 | H               | -0.56246800 | -1.17352400 | -3.71013000 |
| Rh | -0.53940700 | 0.13068800  | -0.14312300 | C               | -0.66139500 | -0.96206600 | -1.54593200 |
| C  | -0.77688800 | -3.91706800 | 0.54539300  | C               | -2.02386200 | -0.97923300 | -1.55907300 |
| C  | -1.81449500 | -3.76653200 | -0.59634300 | H               | -2.49791900 | -1.06309800 | -2.54107100 |
| H  | 0.04163100  | -4.58450400 | 0.25424500  | C               | -2.97193700 | -1.02650100 | -0.45246500 |
| H  | -1.23778500 | -4.33846400 | 1.44581600  | C               | -4.32877800 | -1.31185800 | -0.73107200 |
| H  | -2.79016700 | -4.17119900 | -0.30487100 | C               | -2.62367100 | -0.85932200 | 0.90090700  |
| H  | -1.49500500 | -4.30579700 | -1.49514900 | C               | -5.27261700 | -1.43641200 | 0.27495900  |
| H  | 0.53758300  | -2.57595800 | 1.69647500  | H               | -4.63705000 | -1.44485800 | -1.76548600 |
| H  | -0.38823900 | -1.54303400 | -2.39531500 | C               | -3.55984300 | -0.99174700 | 1.92680000  |
| H  | -1.47032700 | -1.25601800 | 2.29636400  | H               | -1.60213300 | -0.58341500 | 1.15206000  |
| C  | 1.84015000  | -2.15774400 | -0.72799900 | C               | -4.89503300 | -1.28303800 | 1.61898200  |
| C  | 2.79964600  | -2.34916100 | 0.28216100  | H               | -6.31156100 | -1.65753000 | 0.05045200  |
| C  | 2.27483700  | -2.26105800 | -2.06312500 | H               | -3.24207200 | -0.85195100 | 2.95424100  |
| C  | 4.12982300  | -2.62985300 | -0.02394600 | C               | 0.76840200  | 1.95753500  | -1.28643800 |
| H  | 2.51504700  | -2.25584500 | 1.32447900  | C               | -0.27699400 | 2.18475300  | -0.39369900 |
| C  | 3.60477200  | -2.53498400 | -2.37221500 | C               | 2.14515300  | 2.31766900  | -0.75376900 |
| H  | 1.56354500  | -2.13905300 | -2.87261400 | C               | 2.34330300  | 1.41279600  | 0.46649000  |
| C  | 4.54113600  | -2.72340800 | -1.35360200 | C               | 1.27316900  | 1.53205300  | 1.35508200  |
| H  | 4.84771000  | -2.76462400 | 0.78037400  | C               | 0.26263500  | 2.60953500  | 0.97803800  |
| H  | 3.90799000  | -2.61046600 | -3.41329200 | H               | 2.91964200  | 2.17046900  | -1.50737500 |
| H  | 5.57811100  | -2.94168200 | -1.59374100 | Rh              | 0.58855100  | 0.03048700  | -0.13641500 |
| C  | -3.76226000 | -1.13640900 | 0.58294100  | C               | 1.01224500  | 3.96987100  | 0.80284800  |
| C  | -4.60797700 | -0.74273700 | -0.47043200 | C               | 2.13021100  | 3.80019900  | -0.25823800 |
| C  | -4.31694700 | -1.23530000 | 1.87152900  | H               | 0.29383500  | 4.74129300  | 0.50332600  |
| C  | -5.95305600 | -0.45663600 | -0.24342100 | H               | 1.42872400  | 4.27284200  | 1.77021300  |
| H  | -4.20540300 | -0.63521200 | -1.47293500 | H               | 3.11344400  | 4.05001300  | 0.15595200  |
| C  | -5.66011600 | -0.94677100 | 2.09983500  | H               | 1.96301200  | 4.45974700  | -1.11733200 |
| H  | -3.69269200 | -1.55688400 | 2.69880400  | H               | -0.52513300 | 2.69654100  | 1.72715100  |
| C  | -6.48570400 | -0.55841900 | 1.04355800  | H               | 0.61224100  | 1.84766500  | -2.35505100 |
| H  | -6.58557100 | -0.15275200 | -1.07352200 | H               | 1.31897100  | 1.15554700  | 2.37275700  |
| H  | -6.06277200 | -1.02917800 | 3.10550400  | C               | -1.68911100 | 2.42589100  | -0.77826500 |

|   |             |             |             |    |             |             |             |
|---|-------------|-------------|-------------|----|-------------|-------------|-------------|
| C | -2.71777900 | 2.44529000  | 0.18061700  | H  | -6.29572000 | -1.52882100 | 0.14805900  |
| C | -2.04080400 | 2.69762000  | -2.11431500 | H  | -3.22715400 | -0.71019200 | 3.04900500  |
| C | -4.03729900 | 2.71517300  | -0.17785900 | C  | 0.83787900  | 1.93488900  | -1.28100300 |
| H | -2.49365200 | 2.22118400  | 1.21797800  | C  | -0.18495900 | 2.19976000  | -0.37237400 |
| C | -3.35976900 | 2.96223700  | -2.47621700 | C  | 2.23253500  | 2.26751600  | -0.77794300 |
| H | -1.26987900 | 2.72568600  | -2.87763000 | C  | 2.43064900  | 1.37405600  | 0.45048900  |
| C | -4.36706800 | 2.97349500  | -1.50887900 | C  | 1.38070200  | 1.53157500  | 1.35670700  |
| H | -4.81072600 | 2.71229800  | 0.58529200  | C  | 0.39003900  | 2.62877600  | 0.98368800  |
| H | -3.59855800 | 3.17347300  | -3.51545700 | H  | 2.98964300  | 2.09157100  | -1.54301500 |
| H | -5.39529300 | 3.18574900  | -1.78895900 | Rh | 0.63066000  | 0.02815700  | -0.10301100 |
| C | 3.69382800  | 0.89753800  | 0.79380100  | C  | 1.16984800  | 3.96765300  | 0.77669800  |
| C | 4.58597500  | 0.50711200  | -0.22176200 | C  | 2.26343600  | 3.75622600  | -0.30192300 |
| C | 4.14751000  | 0.84412800  | 2.12301600  | H  | 0.46525500  | 4.75277600  | 0.47991900  |
| C | 5.87717600  | 0.07869400  | 0.08007600  | H  | 1.61119300  | 4.27260600  | 1.73233000  |
| H | 4.25887000  | 0.51649900  | -1.25724400 | H  | 3.26005700  | 3.98646200  | 0.09110300  |
| C | 5.43679500  | 0.41256500  | 2.42643500  | H  | 2.09713400  | 4.40878200  | -1.16653300 |
| H | 3.48870600  | 1.15760400  | 2.92652700  | H  | -0.38102700 | 2.74457700  | 1.74611400  |
| C | 6.30942100  | 0.02996800  | 1.40709500  | H  | 0.65922400  | 1.81408000  | -2.34487400 |
| H | 6.54650300  | -0.21887900 | -0.72321000 | H  | 1.43468300  | 1.16578800  | 2.37786900  |
| H | 5.76072700  | 0.37878400  | 3.46306500  | C  | -1.59801200 | 2.46998100  | -0.73389400 |
| H | 7.31661400  | -0.30230600 | 1.64351600  | C  | -2.60563900 | 2.53803200  | 0.24497600  |
| O | -5.89414800 | -1.42455700 | 2.53750800  | C  | -1.97045200 | 2.72138700  | -2.06843200 |
| C | -5.56728600 | -1.29529400 | 3.91117400  | C  | -3.92458300 | 2.83641600  | -0.09261800 |
| H | -5.18307200 | -0.29270000 | 4.14288600  | H  | -2.36676800 | 2.33128000  | 1.28255400  |
| H | -6.49787200 | -1.45879900 | 4.45792100  | C  | -3.28901000 | 3.01406900  | -2.40923000 |
| H | -4.82706000 | -2.04408100 | 4.22278600  | H  | -1.21540500 | 2.71094100  | -2.84787500 |

#### 42-ts-L4-b

|   |             |             |             |
|---|-------------|-------------|-------------|
| C | 2.27189600  | -3.07883800 | -1.46384300 |
| C | 3.03322600  | -2.67184100 | -0.44072300 |
| C | 2.42989600  | -2.22391100 | 0.84040800  |
| C | 0.99048100  | -1.90311700 | 0.81010000  |
| C | 0.14750500  | -2.33537200 | -0.27603200 |
| C | 0.76123600  | -3.17339600 | -1.41719200 |
| H | 2.71403400  | -3.43411200 | -2.39360700 |
| H | 4.11852500  | -2.69356400 | -0.47830500 |
| H | 0.54182700  | -1.84095200 | 1.80147400  |
| H | -0.83722800 | -2.67687600 | 0.03245500  |
| O | 3.09952200  | -2.15243000 | 1.86924600  |
| O | 0.22562200  | -2.78748900 | -2.69124200 |
| C | 0.35348200  | -4.64676900 | -1.23543600 |
| H | -0.73767800 | -4.73289900 | -1.26817700 |
| H | 0.77094500  | -5.24988500 | -2.04834200 |
| H | 0.72118200  | -5.03929300 | -0.28245300 |
| C | 0.03355700  | -1.37028600 | -2.75871700 |
| H | 0.99892100  | -0.86251800 | -2.90053300 |
| H | -0.58830300 | -1.19592800 | -3.64430000 |
| C | -0.66045000 | -0.95600700 | -1.48164000 |
| C | -2.02298300 | -0.93933700 | -1.48183200 |
| H | -2.50909800 | -1.02645400 | -2.45769900 |
| C | -2.95980900 | -0.94874500 | -0.36502900 |
| C | -4.31713700 | -1.22003700 | -0.62025800 |
| C | -2.59067500 | -0.75808100 | 0.98659500  |
| C | -5.26277700 | -1.31542900 | 0.39906200  |
| H | -4.63928500 | -1.37036700 | -1.64813200 |
| C | -3.51713500 | -0.85932100 | 2.01303400  |
| H | -1.56210600 | -0.49225000 | 1.21987200  |
| C | -4.86366400 | -1.14037300 | 1.73058300  |

|    |             |             |             |
|----|-------------|-------------|-------------|
| H  | -6.29572000 | -1.52882100 | 0.14805900  |
| H  | -3.22715400 | -0.71019200 | 3.04900500  |
| C  | 0.83787900  | 1.93488900  | -1.28100300 |
| C  | -0.18495900 | 2.19976000  | -0.37237400 |
| C  | 2.23253500  | 2.26751600  | -0.77794300 |
| C  | 2.43064900  | 1.37405600  | 0.45048900  |
| C  | 1.38070200  | 1.53157500  | 1.35670700  |
| C  | 0.39003900  | 2.62877600  | 0.98368800  |
| H  | 2.98964300  | 2.09157100  | -1.54301500 |
| Rh | 0.63066000  | 0.02815700  | -0.10301100 |
| C  | 1.16984800  | 3.96765300  | 0.77669800  |
| C  | 2.26343600  | 3.75622600  | -0.30192300 |
| H  | 0.46525500  | 4.75277600  | 0.47991900  |
| H  | 1.61119300  | 4.27260600  | 1.73233000  |
| H  | 3.26005700  | 3.98646200  | 0.09110300  |
| H  | 2.09713400  | 4.40878200  | -1.16653300 |
| H  | -0.38102700 | 2.74457700  | 1.74611400  |
| H  | 0.65922400  | 1.81408000  | -2.34487400 |
| H  | 1.43468300  | 1.16578800  | 2.37786900  |
| C  | -1.59801200 | 2.46998100  | -0.73389400 |
| C  | -2.60563900 | 2.53803200  | 0.24497600  |
| C  | -1.97045200 | 2.72138700  | -2.06843200 |
| C  | -3.92458300 | 2.83641600  | -0.09261800 |
| H  | -2.36676800 | 2.33128000  | 1.28255400  |
| C  | -3.28901000 | 3.01406900  | -2.40923000 |
| H  | -1.21540500 | 2.71094100  | -2.84787500 |
| C  | -4.27512500 | 3.07465600  | -1.42201200 |
| H  | -4.68077400 | 2.87258200  | 0.68684900  |
| H  | -3.54366100 | 3.20897200  | -3.44791700 |
| H  | -5.30266100 | 3.30999500  | -1.68598100 |
| C  | 3.77367000  | 0.82893500  | 0.76006100  |
| C  | 4.63594900  | 0.40080300  | -0.26596000 |
| C  | 4.25061400  | 0.78275700  | 2.08139400  |
| C  | 5.92128100  | -0.05642800 | 0.01818000  |
| H  | 4.28932700  | 0.40373400  | -1.29513600 |
| C  | 5.53393300  | 0.32225400  | 2.36720600  |
| H  | 3.61511400  | 1.12413100  | 2.89223200  |
| C  | 6.37702200  | -0.09730500 | 1.33759900  |
| H  | 6.56750700  | -0.38278200 | -0.79281000 |
| H  | 5.87629600  | 0.29461100  | 3.39808800  |
| H  | 7.37968200  | -0.45205100 | 1.56030500  |
| O  | -5.69583400 | -1.21056100 | 2.80968700  |
| C  | -7.06799900 | -1.48716800 | 2.58339500  |
| H  | -7.20956000 | -2.46386500 | 2.10169000  |
| H  | -7.53801600 | -1.50017200 | 3.56858000  |
| H  | -7.54085900 | -0.71102600 | 1.96666900  |

#### 43-L4

|   |             |            |             |
|---|-------------|------------|-------------|
| C | -2.93564100 | 3.22210000 | -0.21232200 |
| C | -3.25084200 | 2.37514200 | 0.77569100  |
| C | -2.22652900 | 1.63960700 | 1.56243800  |
| C | -0.86380200 | 1.60053800 | 1.02410200  |
| C | -0.43830100 | 2.61489800 | -0.04710900 |
| C | -1.53103900 | 3.53867100 | -0.67290500 |
| H | -3.71736000 | 3.76004400 | -0.74849200 |
| H | -4.28195400 | 2.21546600 | 1.07960500  |
| H | -0.14336300 | 1.48266500 | 1.84071500  |
| H | 0.40579600  | 3.23358100 | 0.27861600  |



|    |             |             |             |              |             |             |             |
|----|-------------|-------------|-------------|--------------|-------------|-------------|-------------|
| O  | -2.54567300 | 1.08524200  | 2.62169500  | H            | 4.81681600  | -2.12177400 | 1.62557900  |
| O  | -1.45227200 | 3.29157300  | -2.10075100 | H            | 4.41900900  | -3.55456100 | -2.41049200 |
| C  | -1.23437900 | 5.02696300  | -0.48076700 | H            | 5.85864800  | -3.00551200 | -0.45439300 |
| H  | -0.24464100 | 5.26338500  | -0.88612300 | O            | 6.33847500  | 1.68549000  | 0.78122700  |
| H  | -1.97658600 | 5.63865100  | -1.00512700 | C            | 6.57820400  | 2.22465100  | 2.07017500  |
| H  | -1.25759200 | 5.28984900  | 0.58215700  | H            | 6.15857000  | 1.58761500  | 2.86055300  |
| C  | -1.09777100 | 1.92288600  | -2.28092100 | H            | 7.66347100  | 2.26699900  | 2.18107000  |
| H  | -1.98356000 | 1.28100700  | -2.17425100 | H            | 6.16446100  | 3.23723200  | 2.16891500  |
| H  | -0.69291700 | 1.80640600  | -3.29107100 |              |             |             |             |
| C  | -0.05968100 | 1.68961800  | -1.19353700 | <b>60-L4</b> |             |             |             |
| C  | 1.11983300  | 0.97485400  | -1.34131600 | C            | -3.33174600 | 1.39638200  | 2.27560600  |
| H  | 1.21556700  | 0.44054200  | -2.28673400 | C            | -3.15241400 | 2.44591200  | 1.46079500  |
| C  | 2.42930800  | 1.15552200  | -0.66895900 | C            | -1.80086100 | 2.94278900  | 1.11770900  |
| C  | 3.58233600  | 0.82377100  | -1.41295100 | C            | -0.65063400 | 2.11728500  | 1.56812100  |
| C  | 2.63786700  | 1.66380300  | 0.62410200  | C            | -0.84474300 | 0.99420700  | 2.36694200  |
| C  | 4.86123300  | 1.01083600  | -0.91263500 | C            | -2.20392100 | 0.65974800  | 2.96522700  |
| H  | 3.46548800  | 0.41480900  | -2.41326800 | H            | -4.33012700 | 1.04592300  | 2.53260600  |
| C  | 3.92005700  | 1.85796500  | 1.14326800  | H            | -3.98479600 | 2.99885400  | 1.03274800  |
| H  | 1.79621900  | 1.89705100  | 1.26288300  | H            | 0.32868000  | 2.58049600  | 1.48171700  |
| C  | 5.04364900  | 1.53632600  | 0.37446900  | H            | 0.00001100  | 0.56609800  | 2.90010700  |
| H  | 5.73763700  | 0.75523500  | -1.49989200 | O            | -1.64904800 | 3.99571900  | 0.49301200  |
| H  | 4.02439200  | 2.25254600  | 2.14776900  | O            | -2.46866400 | -0.73895000 | 3.01228600  |
| Rh | -0.39393800 | -0.22057800 | -0.04045400 | C            | -2.19107700 | 1.08538100  | 4.45324100  |
| C  | -1.33072600 | -1.69028800 | 1.27792900  | H            | -1.40795400 | 0.53175400  | 4.98090100  |
| C  | -2.21109500 | -1.60487700 | 0.18922900  | H            | -3.15372200 | 0.83874700  | 4.91237500  |
| C  | -0.24573400 | -2.75245100 | 1.10149600  | H            | -2.00916100 | 2.15920100  | 4.55524700  |
| C  | 0.51773700  | -2.33919600 | -0.16769400 | C            | -2.35024500 | -1.42964200 | 1.75432500  |
| C  | -0.34197200 | -2.18028500 | -1.24582700 | H            | -3.09096800 | -1.03378500 | 1.04585100  |
| C  | -1.78784800 | -2.53799300 | -0.95062500 | H            | -2.62520700 | -2.46326800 | 1.99586900  |
| H  | 0.40981800  | -2.80720100 | 1.97176400  | C            | -0.94469600 | -1.34306200 | 1.21451200  |
| C  | -1.85071700 | -4.00518100 | -0.41109800 | C            | -0.10711100 | -2.37262700 | 1.46838600  |
| C  | -0.92123100 | -4.13349100 | 0.82344100  | H            | -0.55423200 | -3.25588700 | 1.93867100  |
| H  | -2.88813600 | -4.24830600 | -0.15533900 | C            | 1.33793500  | -2.52222800 | 1.23768400  |
| H  | -1.54498200 | -4.68999400 | -1.21009200 | C            | 1.91081400  | -3.81206900 | 1.28024300  |
| H  | -0.14368900 | -4.88813600 | 0.65847900  | C            | 2.21713900  | -1.44941100 | 1.01369000  |
| H  | -1.48509100 | -4.43597600 | 1.71293800  | C            | 3.26885400  | -4.02099300 | 1.08599800  |
| H  | -2.42216500 | -2.42464500 | -1.83072000 | H            | 1.26636200  | -4.66813400 | 1.46885900  |
| H  | -1.56836200 | -1.27847000 | 2.25397100  | C            | 3.58702600  | -1.63932100 | 0.81931100  |
| H  | 0.00644300  | -2.07946000 | -2.26941800 | H            | 1.81933000  | -0.43761500 | 0.99286200  |
| C  | -3.60103500 | -1.09014700 | 0.22466400  | C            | 4.12249900  | -2.93292500 | 0.85113900  |
| C  | -4.24924200 | -0.67634000 | -0.95544600 | H            | 3.69621600  | -5.01872300 | 1.11711600  |
| C  | -4.33516200 | -1.06527700 | 1.42350300  | H            | 4.22154900  | -0.77376100 | 0.66106400  |
| C  | -5.57626600 | -0.25511000 | -0.93863200 | C            | 0.81079800  | 1.50009100  | -1.53606000 |
| H  | -3.70118200 | -0.66478000 | -1.89345300 | C            | -0.52233300 | 1.83338000  | -1.69176100 |
| C  | -5.66522000 | -0.64532800 | 1.44071500  | C            | 1.10990000  | 0.14208300  | -2.18219500 |
| H  | -3.86280400 | -1.38333100 | 2.34519900  | C            | 0.10535800  | -0.81835700 | -1.55838700 |
| C  | -6.29267800 | -0.24087300 | 0.26153700  | C            | -1.23811800 | -0.48324400 | -1.78878100 |
| H  | -6.05141200 | 0.06525800  | -1.86213500 | C            | -1.33744200 | 0.85692900  | -2.52488100 |
| H  | -6.21078300 | -0.63767400 | 2.38037600  | H            | -2.36792400 | 1.19567800  | -2.63766500 |
| H  | -7.33043800 | 0.08166800  | 0.27549500  | Rh           | -0.51249900 | 0.37734700  | 0.16917300  |
| C  | 1.98976800  | -2.48580300 | -0.25679600 | C            | 0.82045500  | 0.25152100  | -3.71243000 |
| C  | 2.81773600  | -2.18696400 | 0.83992200  | C            | -0.65148000 | 0.69321100  | -3.91988100 |
| C  | 2.59535100  | -2.97989800 | -1.42611700 | H            | 1.51678100  | 0.96628600  | -4.16559900 |
| C  | 4.19697100  | -2.36903000 | 0.76814400  | H            | 1.00902100  | -0.72321200 | -4.17629000 |
| H  | 2.37831200  | -1.78393800 | 1.74756700  | H            | 2.12462400  | -0.20588700 | -1.99621700 |
| C  | 3.97595600  | -3.16171600 | -1.49886400 | H            | -0.70644500 | 1.64897800  | -4.45248300 |
| H  | 1.97468300  | -3.25296300 | -2.27462600 | H            | -1.20877500 | -0.04146300 | -4.51196300 |
| C  | 4.78334700  | -2.85886100 | -0.40113200 | C            | 1.88040000  | 2.41820700  | -1.07189600 |

|   |             |             |             |    |             |             |             |
|---|-------------|-------------|-------------|----|-------------|-------------|-------------|
| C | 3.23756300  | 2.04989800  | -1.13600500 | H  | -1.76748800 | 0.61330600  | -0.10136600 |
| C | 1.57606300  | 3.70761300  | -0.58376000 | C  | -4.13120400 | 2.85802900  | -1.05731800 |
| C | 4.24660300  | 2.92586500  | -0.73288400 | H  | -3.74571900 | 4.88873600  | -1.63810400 |
| H | 3.52215400  | 1.07276000  | -1.50970400 | H  | -4.18018300 | 0.77467000  | -0.44718200 |
| C | 2.58494100  | 4.57602300  | -0.17566200 | C  | -0.58102400 | -2.18705400 | -0.60650300 |
| H | 0.54332600  | 4.02869700  | -0.49289000 | C  | 0.68401000  | -2.53572200 | -0.11633700 |
| C | 3.92742000  | 4.19372500  | -0.24907900 | C  | -0.48616600 | -1.68987100 | -2.05591400 |
| H | 5.28524300  | 2.61265300  | -0.80122400 | C  | 0.53911700  | -0.56616400 | -1.99798300 |
| H | 2.31790600  | 5.56014200  | 0.20026400  | C  | 1.80444400  | -0.95884200 | -1.56527100 |
| H | 4.71198400  | 4.87627200  | 0.06596100  | C  | 1.80429100  | -2.43500900 | -1.14725500 |
| C | -2.37918800 | -1.43106100 | -1.78159900 | H  | 2.75995300  | -2.75050200 | -0.72720400 |
| C | -3.70453200 | -0.96684000 | -1.68937200 | Rh | 0.50011500  | -0.35506900 | 0.22829900  |
| C | -2.17405300 | -2.81766900 | -1.89779400 | C  | 0.06398900  | -2.84588000 | -2.94795700 |
| C | -4.78052900 | -1.85284600 | -1.70619200 | C  | 1.43829500  | -3.30295600 | -2.39251300 |
| H | -3.89440900 | 0.09647000  | -1.57756300 | H  | -0.65495500 | -3.67311000 | -2.95483600 |
| C | -3.24955100 | -3.70437400 | -1.91320900 | H  | 0.15426300  | -2.48695600 | -3.97957500 |
| H | -1.16411800 | -3.20312200 | -1.99120300 | H  | -1.43676000 | -1.31315500 | -2.43297200 |
| C | -4.55843400 | -3.22711700 | -1.81763300 | H  | 1.41109600  | -4.35605500 | -2.09125600 |
| H | -5.79419800 | -1.46866900 | -1.62827000 | H  | 2.22572000  | -3.20253300 | -3.14828200 |
| H | -3.06359600 | -4.77097400 | -2.00797100 | C  | -1.87951600 | -2.59395200 | -0.00733800 |
| H | -5.39663400 | -3.91836700 | -1.83348100 | C  | -3.05739100 | -2.61352900 | -0.77833000 |
| H | 0.42045100  | -1.81684300 | -1.28009200 | C  | -1.96988800 | -3.01075800 | 1.33744600  |
| H | -0.92586700 | 2.80956700  | -1.44979700 | C  | -4.27392500 | -3.03083700 | -0.23405200 |
| O | 5.44453600  | -3.23646600 | 0.67637000  | H  | -3.03422800 | -2.32103300 | -1.82247300 |
| C | 6.35091100  | -2.16973700 | 0.46184800  | C  | -3.18643000 | -3.41948000 | 1.87773100  |
| H | 6.36655100  | -1.47379000 | 1.31156800  | H  | -1.09495600 | -2.98058100 | 1.98043100  |
| H | 7.33607500  | -2.62794600 | 0.35363300  | C  | -4.34694300 | -3.43453100 | 1.09810800  |
| H | 6.11030700  | -1.61050800 | -0.45302800 | H  | -5.16281200 | -3.04409500 | -0.85998200 |

#### 61-ts-L4

|   |             |             |             |
|---|-------------|-------------|-------------|
| C | 2.47726000  | 0.69423100  | 3.27547100  |
| C | 2.19115200  | -0.61176800 | 3.33669900  |
| C | 0.84730900  | -1.13334200 | 2.98579700  |
| C | -0.06821000 | -0.20628500 | 2.29610600  |
| C | 0.27825700  | 1.18388200  | 2.09596900  |
| C | 1.49800000  | 1.76524900  | 2.84470400  |
| H | 3.45476600  | 1.07390300  | 3.56892900  |
| H | 2.90673200  | -1.34548800 | 3.69981900  |
| H | -1.12199700 | -0.47082800 | 2.35217600  |
| H | -0.57762800 | 1.85469400  | 2.08541500  |
| O | 0.53868100  | -2.29300800 | 3.28701000  |
| O | 2.18955500  | 2.71451800  | 2.02835400  |
| C | 1.01399100  | 2.54724000  | 4.07750300  |
| H | 0.36683200  | 3.37103700  | 3.75898800  |
| H | 1.87292700  | 2.97005600  | 4.60880200  |
| H | 0.46251800  | 1.89603700  | 4.76257000  |
| C | 2.27822200  | 2.21500300  | 0.68668900  |
| H | 3.01914800  | 1.40739400  | 0.62949000  |
| H | 2.62737900  | 3.05270000  | 0.07469800  |
| C | 0.89138300  | 1.76000000  | 0.30071500  |
| C | 0.10084200  | 2.66082700  | -0.35278900 |
| H | 0.59989000  | 3.57361600  | -0.69235500 |
| C | -1.33440800 | 2.66479400  | -0.61336100 |
| C | -1.93251700 | 3.86272400  | -1.07263800 |
| C | -2.19156200 | 1.56705500  | -0.40714000 |
| C | -3.29628800 | 3.96379800  | -1.29011500 |
| H | -1.30314800 | 4.73251400  | -1.24728400 |
| C | -3.56773300 | 1.65356400  | -0.61592000 |

|    |             |             |             |
|----|-------------|-------------|-------------|
| H  | -1.76748800 | 0.61330600  | -0.10136600 |
| C  | -4.13120400 | 2.85802900  | -1.05731800 |
| H  | -3.74571900 | 4.88873600  | -1.63810400 |
| H  | -4.18018300 | 0.77467000  | -0.44718200 |
| C  | -0.58102400 | -2.18705400 | -0.60650300 |
| C  | 0.68401000  | -2.53572200 | -0.11633700 |
| C  | -0.48616600 | -1.68987100 | -2.05591400 |
| C  | 0.53911700  | -0.56616400 | -1.99798300 |
| C  | 1.80444400  | -0.95884200 | -1.56527100 |
| C  | 1.80429100  | -2.43500900 | -1.14725500 |
| H  | 2.75995300  | -2.75050200 | -0.72720400 |
| Rh | 0.50011500  | -0.35506900 | 0.22829900  |
| C  | 0.06398900  | -2.84588000 | -2.94795700 |
| C  | 1.43829500  | -3.30295600 | -2.39251300 |
| H  | -0.65495500 | -3.67311000 | -2.95483600 |
| H  | 0.15426300  | -2.48695600 | -3.97957500 |
| H  | -1.43676000 | -1.31315500 | -2.43297200 |
| H  | 1.41109600  | -4.35605500 | -2.09125600 |
| H  | 2.22572000  | -3.20253300 | -3.14828200 |
| C  | -1.87951600 | -2.59395200 | -0.00733800 |
| C  | -3.05739100 | -2.61352900 | -0.77833000 |
| C  | -1.96988800 | -3.01075800 | 1.33744600  |
| C  | -4.27392500 | -3.03083700 | -0.23405200 |
| H  | -3.03422800 | -2.32103300 | -1.82247300 |
| C  | -3.18643000 | -3.41948000 | 1.87773100  |
| H  | -1.09495600 | -2.98058100 | 1.98043100  |
| C  | -4.34694300 | -3.43453100 | 1.09810800  |
| H  | -5.16281200 | -3.04409500 | -0.85998200 |
| H  | -3.22540900 | -3.72758500 | 2.91938100  |
| H  | -5.29291600 | -3.75803600 | 1.52430000  |
| C  | 3.06154000  | -0.20627000 | -1.78949500 |
| C  | 4.22788300  | -0.49994200 | -1.05781800 |
| C  | 3.13405000  | 0.81753900  | -2.75282300 |
| C  | 5.41121100  | 0.20514600  | -1.27263900 |
| H  | 4.20538300  | -1.27230300 | -0.29525800 |
| C  | 4.31541800  | 1.52608800  | -2.96483800 |
| H  | 2.26072900  | 1.04864100  | -3.35440200 |
| C  | 5.46149700  | 1.22432100  | -2.22587100 |
| H  | 6.29501200  | -0.04046700 | -0.68975500 |
| H  | 4.34314400  | 2.30874200  | -3.71857400 |
| H  | 6.38404800  | 1.77275100  | -2.39505100 |
| H  | 0.35187200  | 0.37101700  | -2.51119400 |
| H  | 0.82192500  | -3.11855600 | 0.78910800  |
| O  | -5.45796500 | 3.05416900  | -1.30068400 |
| C  | -6.35116100 | 1.97808300  | -1.06118600 |
| H  | -7.34695600 | 2.35694900  | -1.29869300 |
| H  | -6.12784500 | 1.11703300  | -1.70500500 |
| H  | -6.32446300 | 1.65787500  | -0.01142000 |

#### 61-ts-L4-b

|   |             |             |            |
|---|-------------|-------------|------------|
| C | -2.53415300 | -0.48116500 | 3.31063600 |
| C | -2.41240600 | 0.84606100  | 3.19023600 |
| C | -1.12990200 | 1.48022600  | 2.79772400 |
| C | -0.07749800 | 0.58932700  | 2.27604400 |
| C | -0.24436700 | -0.84849300 | 2.26384200 |
| C | -1.41770800 | -1.47074900 | 3.05462200 |
| H | -3.46885800 | -0.93660200 | 3.63428200 |
| H | -3.22613100 | 1.52657200  | 3.42899600 |

|    |             |             |             |   |             |             |             |
|----|-------------|-------------|-------------|---|-------------|-------------|-------------|
| H  | 0.93349700  | 0.98816000  | 2.33139000  | H | -0.18834800 | 1.91343900  | -4.26454400 |
| H  | 0.68594700  | -1.40036700 | 2.37582800  | H | 1.42469800  | 1.18145900  | -2.48586800 |
| O  | -0.98133100 | 2.70102900  | 2.93271900  | H | -1.76979700 | 3.86820100  | -2.74317500 |
| O  | -1.95992000 | -2.59696500 | 2.35840800  | H | -2.37699800 | 2.48049600  | -3.64732300 |
| C  | -0.89568300 | -2.01845400 | 4.39361900  | C | 1.56343000  | 2.84597800  | -0.26578100 |
| H  | -0.14444100 | -2.79261400 | 4.20573300  | C | 2.77827000  | 2.89623800  | -0.97549700 |
| H  | -1.71978000 | -2.46854300 | 4.95678800  | C | 1.51929600  | 3.46051300  | 1.00328800  |
| H  | -0.45186700 | -1.22065800 | 4.99695800  | C | 3.90260700  | 3.53128800  | -0.44404800 |
| C  | -2.04382600 | -2.29571900 | 0.95917800  | H | 2.85604900  | 2.45331700  | -1.96231900 |
| H  | -2.86866800 | -1.59705700 | 0.76794300  | C | 2.64462300  | 4.08762300  | 1.53164200  |
| H  | -2.26764300 | -3.24288800 | 0.45812500  | H | 0.61465100  | 3.41483400  | 1.60244700  |
| C  | -0.70176000 | -1.73462100 | 0.55538900  | C | 3.84352300  | 4.12956300  | 0.81355700  |
| C  | 0.21133700  | -2.61374700 | 0.04852900  | H | 4.82371300  | 3.55782100  | -1.02069500 |
| H  | -0.16715900 | -3.61586000 | -0.17549900 | H | 2.58212700  | 4.54496800  | 2.51574400  |
| C  | 1.64418500  | -2.48108500 | -0.19150200 | H | 4.71838900  | 4.62155200  | 1.23026100  |
| C  | 2.38230200  | -3.63875600 | -0.50736500 | C | -2.94991000 | -0.36247500 | -1.89084700 |
| C  | 2.36846500  | -1.26889400 | -0.10415500 | C | -4.18299600 | -0.11606100 | -1.25786100 |
| C  | 3.76017600  | -3.61210300 | -0.71303600 | C | -2.84697100 | -1.51082400 | -2.69821800 |
| H  | 1.86087100  | -4.59036500 | -0.58443000 | C | -5.26230600 | -0.98381500 | -1.41793700 |
| C  | 3.73991000  | -1.22622000 | -0.29989700 | H | -4.29328200 | 0.75100900  | -0.61395600 |
| H  | 1.83431600  | -0.34246200 | 0.09351500  | C | -3.92415300 | -2.38138900 | -2.85507700 |
| C  | 4.45155900  | -2.39776800 | -0.60588900 | H | -1.91893200 | -1.71361100 | -3.22328200 |
| H  | 4.28003000  | -4.53277300 | -0.95274800 | C | -5.13862900 | -2.12343100 | -2.21545400 |
| H  | 4.28285000  | -0.28797700 | -0.23579200 | H | -6.20110300 | -0.77064900 | -0.91350700 |
| C  | 0.36053800  | 2.20075100  | -0.85520100 | H | -3.81700400 | -3.25820400 | -3.48848700 |
| C  | -0.96485700 | 2.45763600  | -0.48167000 | H | -5.98016400 | -2.79899900 | -2.34178500 |
| C  | 0.41529600  | 1.49013100  | -2.21518800 | H | -0.14994400 | -0.70173900 | -2.39016700 |
| C  | -0.47654000 | 0.26976500  | -2.03487200 | H | -1.22585100 | 3.14437200  | 0.31771100  |
| C  | -1.80361400 | 0.56178000  | -1.72313600 | O | 5.79405100  | -2.24761500 | -0.79011800 |
| C  | -1.99874400 | 2.07187100  | -1.53517600 | C | 6.56227500  | -3.39491100 | -1.11449700 |
| H  | -3.00889500 | 2.32589100  | -1.21188200 | H | 7.59219100  | -3.04744500 | -1.21479900 |
| Rh | -0.55348300 | 0.38513000  | 0.19143400  | H | 6.51144600  | -4.15284300 | -0.32152000 |
| C  | -0.20582500 | 2.42715900  | -3.29659300 | H | 6.23720400  | -3.84384300 | -2.06254700 |
| C  | -1.65610900 | 2.78714300  | -2.88073300 |   |             |             |             |
| H  | 0.41221400  | 3.32674900  | -3.39604400 |   |             |             |             |
